# Supplementary material for: Baseline susceptibility of different European lepidopteran and coleopteran pests to Bt proteins expressed in Bt maize: a systematic review
Source: Springer Nature journal article supplement (doi:10.1186/s13750-016-0077-4), 2016-12-03
Supplement: MOESM7 [file 13750_2016_77_MOESM7_ESM.xlsx]

## Sheet: Tabelle1
article_id	author	publication_year	citation	title	was_peer_reviewed	country	target_order	target_family	target_genus	target_species	generation	stage	test_method	test_duration	no_test_organisms	no_doses	no_replicates	control_no_test_ organism	dose_no_test_ organism	model_used	population	endpoint type	endpoint type LC50/EC50	Cry	Cry angepasst	endpoint_50	unit	factor	adjusted endpoint_50	resistant	range	variability_ endpoint_50	endpoint type	endpoint_90	variability_ endpoint_90	slope	X_2	df	All inclusion criteria positive	qualitiy: toxin source	quality: toxin activity, + control	quality: toxin con-centration checked	qualitiy: ≤ 10 larvae per con-centration	qualitiy: ≤ 2 repli-cations	qualitiy: ≤ 5 toxin concentra-tions	quality: dose response with CIs
809	Avilla, C,, Vargas-Osuna, E,, Gonz+ílez-Cabrera, J,, Ferr+®, J,, & Gonz+ílez-Zamora, J, E,	2005	Journal of Invertebrate Pathology, 90(1): 51-54	Toxicity of several +¦-endotoxins of Bacillus thuringiensis against Helicoverpa armigera (Lepidoptera: Noctuidae) from Spain	y	Spain	Lepidoptera	Noctuidae	Helicoverpa	Helicoverpa armigera	1st	neonate	incorporation	7 days	1800 (1980?)	5 per toxin	30 per toxin	30 per toxin	150 per toxin	probit analysis		LC50	LC50	Cry1Ac4	Cry1Ac4	3.5	µg/ml	1000	3500						Box on the left				x	y	N	Y	y	y	y	y
809	Avilla, C,, Vargas-Osuna, E,, Gonz+ílez-Cabrera, J,, Ferr+®, J,, & Gonz+ílez-Zamora, J, E,	2005	Journal of Invertebrate Pathology, 90(1): 51-69	Toxicity of several +¦-endotoxins of Bacillus thuringiensis against Helicoverpa armigera (Lepidoptera: Noctuidae) from Spain	y	Spain	Lepidoptera	Noctuidae	Helicoverpa	Helicoverpa armigera	1st	neonate	incorporation	22 days	1815 (1980?)	5 per toxin	30 per toxin	30 per toxin	150 per toxin	probit analysis		EC50	EC50	Cry2Ab2	Cry2Ab2	2.3	µg/ml	1000	2300			± 0,5		> 16					x	y	N	Y	y	y	y	y
339	Bird, L, J, & Akhurst, R, J,	2007	Journal of Invertebrate Pathology, 94(2): 84-94	Variation in susceptibility of Helicoverpa armigera (Hübner) and Helicoverpa punctigera (Wallengren) (Lepidoptera: Noctuidae) in Australia to two Bacillus thuringiensis toxins	y	Australia	Lepidoptera	Noctuidae	Helicoverpa	Helicoverpa armigera	New South Wales (F1, F2, F3), Queensland F1, F2), Western Australia (F2, F3), Northern Territory (F2), lab strain	neonate 3rd	surface	7 d		6	3 x 18 strains	?	?	probit analysis	Boggabilla NSW (F2)	LC50	LC50	Cry1Ac, HD73, MVP protoxin, encapsulated in Pseudomonas fluorescens	Cry1Ac	23.3	ng/cm2	1	23.3										x	y	N	y	n	y	y	y
339	Bird, L, J, & Akhurst, R, J,	2007	Journal of Invertebrate Pathology, 94(2): 84-94	Variation in susceptibility of Helicoverpa armigera (Hübner) and Helicoverpa punctigera (Wallengren) (Lepidoptera: Noctuidae) in Australia to two Bacillus thuringiensis toxins	y	Australia	Lepidoptera	Noctuidae	Helicoverpa	Helicoverpa armigera	New South Wales (F1, F2, F3), Queensland F1, F2), Western Australia (F2, F3), Northern Territory (F2), lab strain	neonate 3rd	surface	7 d		6	3 x 18 strains	?	?	probit analysis	Burren Junction NSW (F1)	LC50	LC50	Cry1Ac, HD73, MVP protoxin, encapsulated in Pseudomonas fluorescens	Cry1Ac	24.4	ng/cm2	1	24.4										x	y	N	y	n	y	y	y
339	Bird, L, J, & Akhurst, R, J,	2007	Journal of Invertebrate Pathology, 94(2): 84-94	Variation in susceptibility of Helicoverpa armigera (Hübner) and Helicoverpa punctigera (Wallengren) (Lepidoptera: Noctuidae) in Australia to two Bacillus thuringiensis toxins	y	Australia	Lepidoptera	Noctuidae	Helicoverpa	Helicoverpa armigera	New South Wales (F1, F2, F3), Queensland F1, F2), Western Australia (F2, F3), Northern Territory (F2), lab strain	neonate 3rd	surface	7 d		6	3 x 18 strains	?	?	probit analysis	St, George QLD (F2)	LC50	LC50	Cry1Ac, HD73, MVP protoxin, encapsulated in Pseudomonas fluorescens	Cry1Ac	25.4	ng/cm2	1	25.4										x	y	N	y	n	y	y	y
339	Bird, L, J, & Akhurst, R, J,	2007	Journal of Invertebrate Pathology, 94(2): 84-94	Variation in susceptibility of Helicoverpa armigera (Hübner) and Helicoverpa punctigera (Wallengren) (Lepidoptera: Noctuidae) in Australia to two Bacillus thuringiensis toxins	y	Australia	Lepidoptera	Noctuidae	Helicoverpa	Helicoverpa armigera	New South Wales (F1, F2, F3), Queensland F1, F2), Western Australia (F2, F3), Northern Territory (F2), lab strain	neonate 3rd	surface	7 d		6	3 x 18 strains	?	?	probit analysis	Jimbour QLD (F1)	LC50	LC50	Cry1Ac, HD73, MVP protoxin, encapsulated in Pseudomonas fluorescens	Cry1Ac	33.1	ng/cm2	1	33.1										x	y	N	y	n	y	y	y
339	Bird, L, J, & Akhurst, R, J,	2007	Journal of Invertebrate Pathology, 94(2): 84-94	Variation in susceptibility of Helicoverpa armigera (Hübner) and Helicoverpa punctigera (Wallengren) (Lepidoptera: Noctuidae) in Australia to two Bacillus thuringiensis toxins	y	Australia	Lepidoptera	Noctuidae	Helicoverpa	Helicoverpa armigera	New South Wales (F1, F2, F3), Queensland F1, F2), Western Australia (F2, F3), Northern Territory (F2), lab strain	neonate 3rd	surface	7 d		6	3 x 18 strains	?	?	probit analysis	Wee Waa NSW (F1)	LC50	LC50	Cry1Ac, HD73, MVP protoxin, encapsulated in Pseudomonas fluorescens	Cry1Ac	37.6	ng/cm2	1	37.6										x	y	N	y	n	y	y	y
339	Bird, L, J, & Akhurst, R, J,	2007	Journal of Invertebrate Pathology, 94(2): 84-94	Variation in susceptibility of Helicoverpa armigera (Hübner) and Helicoverpa punctigera (Wallengren) (Lepidoptera: Noctuidae) in Australia to two Bacillus thuringiensis toxins	y	Australia	Lepidoptera	Noctuidae	Helicoverpa	Helicoverpa armigera	New South Wales (F1, F2, F3), Queensland F1, F2), Western Australia (F2, F3), Northern Territory (F2), lab strain	neonate 3rd	surface	7 d		6	3 x 18 strains	?	?	probit analysis	Hillston NSW (F1)	LC50	LC50	Cry1Ac, HD73, MVP protoxin, encapsulated in Pseudomonas fluorescens	Cry1Ac	43	ng/cm2	1	43										x	y	N	y	n	y	y	y
339	Bird, L, J, & Akhurst, R, J,	2007	Journal of Invertebrate Pathology, 94(2): 84-94	Variation in susceptibility of Helicoverpa armigera (Hübner) and Helicoverpa punctigera (Wallengren) (Lepidoptera: Noctuidae) in Australia to two Bacillus thuringiensis toxins	y	Australia	Lepidoptera	Noctuidae	Helicoverpa	Helicoverpa armigera	New South Wales (F1, F2, F3), Queensland F1, F2), Western Australia (F2, F3), Northern Territory (F2), lab strain	neonate 3rd	surface	7 d		6	3 x 18 strains	?	?	probit analysis	Edgeroi NSW (F2)	LC50	LC50	Cry1Ac, HD73, MVP protoxin, encapsulated in Pseudomonas fluorescens	Cry1Ac	50.2	ng/cm2	1	50.2										x	y	N	y	n	y	y	y
339	Bird, L, J, & Akhurst, R, J,	2007	Journal of Invertebrate Pathology, 94(2): 84-94	Variation in susceptibility of Helicoverpa armigera (Hübner) and Helicoverpa punctigera (Wallengren) (Lepidoptera: Noctuidae) in Australia to two Bacillus thuringiensis toxins	y	Australia	Lepidoptera	Noctuidae	Helicoverpa	Helicoverpa armigera	New South Wales (F1, F2, F3), Queensland F1, F2), Western Australia (F2, F3), Northern Territory (F2), lab strain	neonate 3rd	surface	7 d		6	3 x 18 strains	?	?	probit analysis	Emerald QLD (F1)	LC50	LC50	Cry1Ac, HD73, MVP protoxin, encapsulated in Pseudomonas fluorescens	Cry1Ac	59.8	ng/cm2	1	59.8										x	y	N	y	n	y	y	y
339	Bird, L, J, & Akhurst, R, J,	2007	Journal of Invertebrate Pathology, 94(2): 84-94	Variation in susceptibility of Helicoverpa armigera (Hübner) and Helicoverpa punctigera (Wallengren) (Lepidoptera: Noctuidae) in Australia to two Bacillus thuringiensis toxins	y	Australia	Lepidoptera	Noctuidae	Helicoverpa	Helicoverpa armigera	New South Wales (F1, F2, F3), Queensland F1, F2), Western Australia (F2, F3), Northern Territory (F2), lab strain	neonate 3rd	surface	7 d		6	3 x 18 strains	?	?	probit analysis	Wee Waa NSW (F1)	LC50	LC50	Cry1Ac, HD73, MVP protoxin, encapsulated in Pseudomonas fluorescens	Cry1Ac	60.1	ng/cm2	1	60.1										x	y	N	y	n	y	y	y
339	Bird, L, J, & Akhurst, R, J,	2007	Journal of Invertebrate Pathology, 94(2): 84-94	Variation in susceptibility of Helicoverpa armigera (Hübner) and Helicoverpa punctigera (Wallengren) (Lepidoptera: Noctuidae) in Australia to two Bacillus thuringiensis toxins	y	Australia	Lepidoptera	Noctuidae	Helicoverpa	Helicoverpa armigera	New South Wales (F1, F2, F3), Queensland F1, F2), Western Australia (F2, F3), Northern Territory (F2), lab strain	neonate 3rd	surface	7 d		6	3 x 18 strains	?	?	probit analysis	Kununurra WA (F2)	LC50	LC50	Cry1Ac, HD73, MVP protoxin, encapsulated in Pseudomonas fluorescens	Cry1Ac	62.2	ng/cm2	1	62.2										x	y	N	y	n	y	y	y
339	Bird, L, J, & Akhurst, R, J,	2007	Journal of Invertebrate Pathology, 94(2): 84-94	Variation in susceptibility of Helicoverpa armigera (Hübner) and Helicoverpa punctigera (Wallengren) (Lepidoptera: Noctuidae) in Australia to two Bacillus thuringiensis toxins	y	Australia	Lepidoptera	Noctuidae	Helicoverpa	Helicoverpa armigera	New South Wales (F1, F2, F3), Queensland F1, F2), Western Australia (F2, F3), Northern Territory (F2), lab strain	neonate 3rd	surface	7 d		6	3 x 18 strains	?	?	probit analysis	GriYth NSW (F2)	LC50	LC50	Cry1Ac, HD73, MVP protoxin, encapsulated in Pseudomonas fluorescens	Cry1Ac	63	ng/cm2	1	63										x	y	N	y	n	y	y	y
339	Bird, L, J, & Akhurst, R, J,	2007	Journal of Invertebrate Pathology, 94(2): 84-94	Variation in susceptibility of Helicoverpa armigera (Hübner) and Helicoverpa punctigera (Wallengren) (Lepidoptera: Noctuidae) in Australia to two Bacillus thuringiensis toxins	y	Australia	Lepidoptera	Noctuidae	Helicoverpa	Helicoverpa armigera	New South Wales (F1, F2, F3), Queensland F1, F2), Western Australia (F2, F3), Northern Territory (F2), lab strain	neonate 3rd	surface	7 d		6	3 x 18 strains	?	?	probit analysis	Goondiwindi QLD (F2)	LC50	LC50	Cry1Ac, HD73, MVP protoxin, encapsulated in Pseudomonas fluorescens	Cry1Ac	68.3	ng/cm2	1	68.3										x	y	N	y	n	y	y	y
339	Bird, L, J, & Akhurst, R, J,	2007	Journal of Invertebrate Pathology, 94(2): 84-94	Variation in susceptibility of Helicoverpa armigera (Hübner) and Helicoverpa punctigera (Wallengren) (Lepidoptera: Noctuidae) in Australia to two Bacillus thuringiensis toxins	y	Australia	Lepidoptera	Noctuidae	Helicoverpa	Helicoverpa armigera	New South Wales (F1, F2, F3), Queensland F1, F2), Western Australia (F2, F3), Northern Territory (F2), lab strain	neonate 3rd	surface	7 d		6	3 x 18 strains	?	?	probit analysis	Mareeba QLD (F1)	LC50	LC50	Cry1Ac, HD73, MVP protoxin, encapsulated in Pseudomonas fluorescens	Cry1Ac	72.3	ng/cm2	1	72.3										x	y	N	y	n	y	y	y
339	Bird, L, J, & Akhurst, R, J,	2007	Journal of Invertebrate Pathology, 94(2): 84-94	Variation in susceptibility of Helicoverpa armigera (Hübner) and Helicoverpa punctigera (Wallengren) (Lepidoptera: Noctuidae) in Australia to two Bacillus thuringiensis toxins	y	Australia	Lepidoptera	Noctuidae	Helicoverpa	Helicoverpa armigera	New South Wales (F1, F2, F3), Queensland F1, F2), Western Australia (F2, F3), Northern Territory (F2), lab strain	neonate 3rd	surface	7 d		6	3 x 18 strains	?	?	probit analysis	Bundaberg QLD (F1)	LC50	LC50	Cry1Ac, HD73, MVP protoxin, encapsulated in Pseudomonas fluorescens	Cry1Ac	82.8	ng/cm2	1	82.8										x	y	N	y	n	y	y	y
339	Bird, L, J, & Akhurst, R, J,	2007	Journal of Invertebrate Pathology, 94(2): 84-94	Variation in susceptibility of Helicoverpa armigera (Hübner) and Helicoverpa punctigera (Wallengren) (Lepidoptera: Noctuidae) in Australia to two Bacillus thuringiensis toxins	y	Australia	Lepidoptera	Noctuidae	Helicoverpa	Helicoverpa armigera	New South Wales (F1, F2, F3), Queensland F1, F2), Western Australia (F2, F3), Northern Territory (F2), lab strain	neonate 3rd	surface	7 d		6	3 x 18 strains	?	?	probit analysis	Emerald QLD (F2)	LC50	LC50	Cry1Ac, HD73, MVP protoxin, encapsulated in Pseudomonas fluorescens	Cry1Ac	83	ng/cm2	1	83										x	y	N	y	n	y	y	y
339	Bird, L, J, & Akhurst, R, J,	2007	Journal of Invertebrate Pathology, 94(2): 84-94	Variation in susceptibility of Helicoverpa armigera (Hübner) and Helicoverpa punctigera (Wallengren) (Lepidoptera: Noctuidae) in Australia to two Bacillus thuringiensis toxins	y	Australia	Lepidoptera	Noctuidae	Helicoverpa	Helicoverpa armigera	New South Wales (F1, F2, F3), Queensland F1, F2), Western Australia (F2, F3), Northern Territory (F2), lab strain	neonate 3rd	surface	7 d		6	3 x 18 strains	?	?	probit analysis	Moree NSW (F1)	LC50	LC50	Cry1Ac, HD73, MVP protoxin, encapsulated in Pseudomonas fluorescens	Cry1Ac	91.6	ng/cm2	1	91.6										x	y	N	y	n	y	y	y
339	Bird, L, J, & Akhurst, R, J,	2007	Journal of Invertebrate Pathology, 94(2): 84-94	Variation in susceptibility of Helicoverpa armigera (Hübner) and Helicoverpa punctigera (Wallengren) (Lepidoptera: Noctuidae) in Australia to two Bacillus thuringiensis toxins	y	Australia	Lepidoptera	Noctuidae	Helicoverpa	Helicoverpa armigera	New South Wales (F1, F2, F3), Queensland F1, F2), Western Australia (F2, F3), Northern Territory (F2), lab strain	neonate 3rd	surface	7 d		6	3 x 18 strains	?	?	probit analysis	Kingaroy QLD (F1)	LC50	LC50	Cry1Ac, HD73, MVP protoxin, encapsulated in Pseudomonas fluorescens	Cry1Ac	107.6	ng/cm2	1	107.6										x	y	N	y	n	y	y	y
339	Bird, L, J, & Akhurst, R, J,	2007	Journal of Invertebrate Pathology, 94(2): 84-94	Variation in susceptibility of Helicoverpa armigera (Hübner) and Helicoverpa punctigera (Wallengren) (Lepidoptera: Noctuidae) in Australia to two Bacillus thuringiensis toxins	y	Australia	Lepidoptera	Noctuidae	Helicoverpa	Helicoverpa armigera	New South Wales (F1, F2, F3), Queensland F1, F2), Western Australia (F2, F3), Northern Territory (F2), lab strain	neonate 3rd	surface	7 d		6	3 x 18 strains	?	?	probit analysis	Burren Junction NSW (F1)	IC50	EC50	Cry1Ac, HD73, MVP protoxin, encapsulated in Pseudomonas fluorescens	Cry1Ac	0.39	µg/ml	1000	390										x	y	N	y	n	y	y	y
339	Bird, L, J, & Akhurst, R, J,	2007	Journal of Invertebrate Pathology, 94(2): 84-94	Variation in susceptibility of Helicoverpa armigera (Hübner) and Helicoverpa punctigera (Wallengren) (Lepidoptera: Noctuidae) in Australia to two Bacillus thuringiensis toxins	y	Australia	Lepidoptera	Noctuidae	Helicoverpa	Helicoverpa armigera	New South Wales (F1, F2, F3), Queensland F1, F2), Western Australia (F2, F3), Northern Territory (F2), lab strain	neonate 3rd	surface	7 d		6	3 x 18 strains	?	?	probit analysis	Hillston NSW (F1)	IC50	EC50	Cry1Ac, HD73, MVP protoxin, encapsulated in Pseudomonas fluorescens	Cry1Ac	0.53	µg/ml	1000	530										x	y	N	y	n	y	y	y
339	Bird, L, J, & Akhurst, R, J,	2007	Journal of Invertebrate Pathology, 94(2): 84-94	Variation in susceptibility of Helicoverpa armigera (Hübner) and Helicoverpa punctigera (Wallengren) (Lepidoptera: Noctuidae) in Australia to two Bacillus thuringiensis toxins	y	Australia	Lepidoptera	Noctuidae	Helicoverpa	Helicoverpa armigera	New South Wales (F1, F2, F3), Queensland F1, F2), Western Australia (F2, F3), Northern Territory (F2), lab strain	neonate 3rd	surface	7 d		6	3 x 18 strains	?	?	probit analysis	Breeza NSW (F2)	IC50	EC50	Cry1Ac, HD73, MVP protoxin, encapsulated in Pseudomonas fluorescens	Cry1Ac	0.61	µg/ml	1000	610										x	y	N	y	n	y	y	y
339	Bird, L, J, & Akhurst, R, J,	2007	Journal of Invertebrate Pathology, 94(2): 84-94	Variation in susceptibility of Helicoverpa armigera (Hübner) and Helicoverpa punctigera (Wallengren) (Lepidoptera: Noctuidae) in Australia to two Bacillus thuringiensis toxins	y	Australia	Lepidoptera	Noctuidae	Helicoverpa	Helicoverpa armigera	New South Wales (F1, F2, F3), Queensland F1, F2), Western Australia (F2, F3), Northern Territory (F2), lab strain	neonate 3rd	surface	7 d		6	3 x 18 strains	?	?	probit analysis	Wee Waa NSW (F1)	IC50	EC50	Cry1Ac, HD73, MVP protoxin, encapsulated in Pseudomonas fluorescens	Cry1Ac	0.81	µg/ml	1000	810										x	y	N	y	n	y	y	y
339	Bird, L, J, & Akhurst, R, J,	2007	Journal of Invertebrate Pathology, 94(2): 84-94	Variation in susceptibility of Helicoverpa armigera (Hübner) and Helicoverpa punctigera (Wallengren) (Lepidoptera: Noctuidae) in Australia to two Bacillus thuringiensis toxins	y	Australia	Lepidoptera	Noctuidae	Helicoverpa	Helicoverpa armigera	New South Wales (F1, F2, F3), Queensland F1, F2), Western Australia (F2, F3), Northern Territory (F2), lab strain	neonate 3rd	surface	7 d		6	3 x 18 strains	?	?	probit analysis	Emerald QLD (F2)	IC50	EC50	Cry1Ac, HD73, MVP protoxin, encapsulated in Pseudomonas fluorescens	Cry1Ac	0.91	µg/ml	1000	910										x	y	N	y	n	y	y	y
339	Bird, L, J, & Akhurst, R, J,	2007	Journal of Invertebrate Pathology, 94(2): 84-94	Variation in susceptibility of Helicoverpa armigera (Hübner) and Helicoverpa punctigera (Wallengren) (Lepidoptera: Noctuidae) in Australia to two Bacillus thuringiensis toxins	y	Australia	Lepidoptera	Noctuidae	Helicoverpa	Helicoverpa armigera	New South Wales (F1, F2, F3), Queensland F1, F2), Western Australia (F2, F3), Northern Territory (F2), lab strain	neonate 3rd	surface	7 d		6	3 x 18 strains	?	?	probit analysis	Kingaroy QLD (F1)	IC50	EC50	Cry1Ac, HD73, MVP protoxin, encapsulated in Pseudomonas fluorescens	Cry1Ac	0.94	µg/ml	1000	940										x	y	N	y	n	y	y	y
339	Bird, L, J, & Akhurst, R, J,	2007	Journal of Invertebrate Pathology, 94(2): 84-94	Variation in susceptibility of Helicoverpa armigera (Hübner) and Helicoverpa punctigera (Wallengren) (Lepidoptera: Noctuidae) in Australia to two Bacillus thuringiensis toxins	y	Australia	Lepidoptera	Noctuidae	Helicoverpa	Helicoverpa armigera	New South Wales (F1, F2, F3), Queensland F1, F2), Western Australia (F2, F3), Northern Territory (F2), lab strain	neonate 3rd	surface	7 d		6	3 x 18 strains	?	?	probit analysis	Moree NSW (F1)	IC50	EC50	Cry1Ac, HD73, MVP protoxin, encapsulated in Pseudomonas fluorescens	Cry1Ac	1	µg/ml	1000	1000										x	y	N	y	n	y	y	y
339	Bird, L, J, & Akhurst, R, J,	2007	Journal of Invertebrate Pathology, 94(2): 84-94	Variation in susceptibility of Helicoverpa armigera (Hübner) and Helicoverpa punctigera (Wallengren) (Lepidoptera: Noctuidae) in Australia to two Bacillus thuringiensis toxins	y	Australia	Lepidoptera	Noctuidae	Helicoverpa	Helicoverpa armigera	New South Wales (F1, F2, F3), Queensland F1, F2), Western Australia (F2, F3), Northern Territory (F2), lab strain	neonate 3rd	surface	7 d		6	3 x 18 strains	?	?	probit analysis	Goondiwindi QLD (F2)	IC50	EC50	Cry1Ac, HD73, MVP protoxin, encapsulated in Pseudomonas fluorescens	Cry1Ac	1.3	µg/ml	1000	1300										x	y	N	y	n	y	y	y
339	Bird, L, J, & Akhurst, R, J,	2007	Journal of Invertebrate Pathology, 94(2): 84-94	Variation in susceptibility of Helicoverpa armigera (Hübner) and Helicoverpa punctigera (Wallengren) (Lepidoptera: Noctuidae) in Australia to two Bacillus thuringiensis toxins	y	Australia	Lepidoptera	Noctuidae	Helicoverpa	Helicoverpa armigera	New South Wales (F1, F2, F3), Queensland F1, F2), Western Australia (F2, F3), Northern Territory (F2), lab strain	neonate 3rd	surface	7 d		6	3 x 20 strains	?	?	probit analysis	Boggabilla NSW (F2)	LC50	LC50	Cry2Ab	Cry2Ab	63.5	ng/cm2	1	63.5										x	y	N	y	n	y	y	y
339	Bird, L, J, & Akhurst, R, J,	2007	Journal of Invertebrate Pathology, 94(2): 84-94	Variation in susceptibility of Helicoverpa armigera (Hübner) and Helicoverpa punctigera (Wallengren) (Lepidoptera: Noctuidae) in Australia to two Bacillus thuringiensis toxins	y	Australia	Lepidoptera	Noctuidae	Helicoverpa	Helicoverpa armigera	New South Wales (F1, F2, F3), Queensland F1, F2), Western Australia (F2, F3), Northern Territory (F2), lab strain	neonate 3rd	surface	7 d		6	3 x 20 strains	?	?	probit analysis	Kununurra WA (F3)	LC50	LC50	Cry2Ab	Cry2Ab	89.9	ng/cm2	1	89.9										x	y	N	y	n	y	y	y
339	Bird, L, J, & Akhurst, R, J,	2007	Journal of Invertebrate Pathology, 94(2): 84-94	Variation in susceptibility of Helicoverpa armigera (Hübner) and Helicoverpa punctigera (Wallengren) (Lepidoptera: Noctuidae) in Australia to two Bacillus thuringiensis toxins	y	Australia	Lepidoptera	Noctuidae	Helicoverpa	Helicoverpa armigera	New South Wales (F1, F2, F3), Queensland F1, F2), Western Australia (F2, F3), Northern Territory (F2), lab strain	neonate 3rd	surface	7 d		6	3 x 20 strains	?	?	probit analysis	St George QLD (F2)	LC50	LC50	Cry2Ab	Cry2Ab	94.3	ng/cm2	1	94.3										x	y	N	y	n	y	y	y
339	Bird, L, J, & Akhurst, R, J,	2007	Journal of Invertebrate Pathology, 94(2): 84-94	Variation in susceptibility of Helicoverpa armigera (Hübner) and Helicoverpa punctigera (Wallengren) (Lepidoptera: Noctuidae) in Australia to two Bacillus thuringiensis toxins	y	Australia	Lepidoptera	Noctuidae	Helicoverpa	Helicoverpa armigera	New South Wales (F1, F2, F3), Queensland F1, F2), Western Australia (F2, F3), Northern Territory (F2), lab strain	neonate 3rd	surface	7 d		6	3 x 20 strains	?	?	probit analysis	Burren Junction (F1)	LC50	LC50	Cry2Ab	Cry2Ab	94.9	ng/cm2	1	94.9										x	y	N	y	n	y	y	y
339	Bird, L, J, & Akhurst, R, J,	2007	Journal of Invertebrate Pathology, 94(2): 84-94	Variation in susceptibility of Helicoverpa armigera (Hübner) and Helicoverpa punctigera (Wallengren) (Lepidoptera: Noctuidae) in Australia to two Bacillus thuringiensis toxins	y	Australia	Lepidoptera	Noctuidae	Helicoverpa	Helicoverpa armigera	New South Wales (F1, F2, F3), Queensland F1, F2), Western Australia (F2, F3), Northern Territory (F2), lab strain	neonate 3rd	surface	7 d		6	3 x 20 strains	?	?	probit analysis	Bundaberg QLD (F1)	LC50	LC50	Cry2Ab	Cry2Ab	115.8	ng/cm2	1	115.8										x	y	N	y	n	y	y	y
339	Bird, L, J, & Akhurst, R, J,	2007	Journal of Invertebrate Pathology, 94(2): 84-94	Variation in susceptibility of Helicoverpa armigera (Hübner) and Helicoverpa punctigera (Wallengren) (Lepidoptera: Noctuidae) in Australia to two Bacillus thuringiensis toxins	y	Australia	Lepidoptera	Noctuidae	Helicoverpa	Helicoverpa armigera	New South Wales (F1, F2, F3), Queensland F1, F2), Western Australia (F2, F3), Northern Territory (F2), lab strain	neonate 3rd	surface	7 d		6	3 x 20 strains	?	?	probit analysis	Goondiwindi QLD (F2)	LC50	LC50	Cry2Ab	Cry2Ab	130.3	ng/cm2	1	130.3										x	y	N	y	n	y	y	y
339	Bird, L, J, & Akhurst, R, J,	2007	Journal of Invertebrate Pathology, 94(2): 84-94	Variation in susceptibility of Helicoverpa armigera (Hübner) and Helicoverpa punctigera (Wallengren) (Lepidoptera: Noctuidae) in Australia to two Bacillus thuringiensis toxins	y	Australia	Lepidoptera	Noctuidae	Helicoverpa	Helicoverpa armigera	New South Wales (F1, F2, F3), Queensland F1, F2), Western Australia (F2, F3), Northern Territory (F2), lab strain	neonate 3rd	surface	7 d		6	3 x 20 strains	?	?	probit analysis	Moree NSW (F1)	LC50	LC50	Cry2Ab	Cry2Ab	132.3	ng/cm2	1	132.3										x	y	N	y	n	y	y	y
339	Bird, L, J, & Akhurst, R, J,	2007	Journal of Invertebrate Pathology, 94(2): 84-94	Variation in susceptibility of Helicoverpa armigera (Hübner) and Helicoverpa punctigera (Wallengren) (Lepidoptera: Noctuidae) in Australia to two Bacillus thuringiensis toxins	y	Australia	Lepidoptera	Noctuidae	Helicoverpa	Helicoverpa armigera	New South Wales (F1, F2, F3), Queensland F1, F2), Western Australia (F2, F3), Northern Territory (F2), lab strain	neonate 3rd	surface	7 d		6	3 x 20 strains	?	?	probit analysis	Hillston NSW (F1)	LC50	LC50	Cry2Ab	Cry2Ab	133.8	ng/cm2	1	133.8										x	y	N	y	n	y	y	y
339	Bird, L, J, & Akhurst, R, J,	2007	Journal of Invertebrate Pathology, 94(2): 84-94	Variation in susceptibility of Helicoverpa armigera (Hübner) and Helicoverpa punctigera (Wallengren) (Lepidoptera: Noctuidae) in Australia to two Bacillus thuringiensis toxins	y	Australia	Lepidoptera	Noctuidae	Helicoverpa	Helicoverpa armigera	New South Wales (F1, F2, F3), Queensland F1, F2), Western Australia (F2, F3), Northern Territory (F2), lab strain	neonate 3rd	surface	7 d		6	3 x 20 strains	?	?	probit analysis	Katherine NT (F2)	LC50	LC50	Cry2Ab	Cry2Ab	139.7	ng/cm2	1	139.7										x	y	N	y	n	y	y	y
339	Bird, L, J, & Akhurst, R, J,	2007	Journal of Invertebrate Pathology, 94(2): 84-94	Variation in susceptibility of Helicoverpa armigera (Hübner) and Helicoverpa punctigera (Wallengren) (Lepidoptera: Noctuidae) in Australia to two Bacillus thuringiensis toxins	y	Australia	Lepidoptera	Noctuidae	Helicoverpa	Helicoverpa armigera	New South Wales (F1, F2, F3), Queensland F1, F2), Western Australia (F2, F3), Northern Territory (F2), lab strain	neonate 3rd	surface	7 d		6	3 x 20 strains	?	?	probit analysis	Jimbour QLD (F2)	LC50	LC50	Cry2Ab	Cry2Ab	151.5	ng/cm2	1	151.5										x	y	N	y	n	y	y	y
339	Bird, L, J, & Akhurst, R, J,	2007	Journal of Invertebrate Pathology, 94(2): 84-94	Variation in susceptibility of Helicoverpa armigera (Hübner) and Helicoverpa punctigera (Wallengren) (Lepidoptera: Noctuidae) in Australia to two Bacillus thuringiensis toxins	y	Australia	Lepidoptera	Noctuidae	Helicoverpa	Helicoverpa armigera	New South Wales (F1, F2, F3), Queensland F1, F2), Western Australia (F2, F3), Northern Territory (F2), lab strain	neonate 3rd	surface	7 d		6	3 x 20 strains	?	?	probit analysis	Maules Ck, NSW (F3)	LC50	LC50	Cry2Ab	Cry2Ab	168	ng/cm2	1	168										x	y	N	y	n	y	y	y
339	Bird, L, J, & Akhurst, R, J,	2007	Journal of Invertebrate Pathology, 94(2): 84-94	Variation in susceptibility of Helicoverpa armigera (Hübner) and Helicoverpa punctigera (Wallengren) (Lepidoptera: Noctuidae) in Australia to two Bacillus thuringiensis toxins	y	Australia	Lepidoptera	Noctuidae	Helicoverpa	Helicoverpa armigera	New South Wales (F1, F2, F3), Queensland F1, F2), Western Australia (F2, F3), Northern Territory (F2), lab strain	neonate 3rd	surface	7 d		6	3 x 20 strains	?	?	probit analysis	Griffith NSW (F1)	LC50	LC50	Cry2Ab	Cry2Ab	171.6	ng/cm2	1	171.6										x	y	N	y	n	y	y	y
339	Bird, L, J, & Akhurst, R, J,	2007	Journal of Invertebrate Pathology, 94(2): 84-94	Variation in susceptibility of Helicoverpa armigera (Hübner) and Helicoverpa punctigera (Wallengren) (Lepidoptera: Noctuidae) in Australia to two Bacillus thuringiensis toxins	y	Australia	Lepidoptera	Noctuidae	Helicoverpa	Helicoverpa armigera	New South Wales (F1, F2, F3), Queensland F1, F2), Western Australia (F2, F3), Northern Territory (F2), lab strain	neonate 3rd	surface	7 d		6	3 x 20 strains	?	?	probit analysis	Wee Waa NSW (F1)	LC50	LC50	Cry2Ab	Cry2Ab	179.3	ng/cm2	1	179.3										x	y	N	y	n	y	y	y
339	Bird, L, J, & Akhurst, R, J,	2007	Journal of Invertebrate Pathology, 94(2): 84-94	Variation in susceptibility of Helicoverpa armigera (Hübner) and Helicoverpa punctigera (Wallengren) (Lepidoptera: Noctuidae) in Australia to two Bacillus thuringiensis toxins	y	Australia	Lepidoptera	Noctuidae	Helicoverpa	Helicoverpa armigera	New South Wales (F1, F2, F3), Queensland F1, F2), Western Australia (F2, F3), Northern Territory (F2), lab strain	neonate 3rd	surface	7 d		6	3 x 20 strains	?	?	probit analysis	Emerald QLD (F1)	LC50	LC50	Cry2Ab	Cry2Ab	193.6	ng/cm2	1	193.6										x	y	N	y	n	y	y	y
339	Bird, L, J, & Akhurst, R, J,	2007	Journal of Invertebrate Pathology, 94(2): 84-94	Variation in susceptibility of Helicoverpa armigera (Hübner) and Helicoverpa punctigera (Wallengren) (Lepidoptera: Noctuidae) in Australia to two Bacillus thuringiensis toxins	y	Australia	Lepidoptera	Noctuidae	Helicoverpa	Helicoverpa armigera	New South Wales (F1, F2, F3), Queensland F1, F2), Western Australia (F2, F3), Northern Territory (F2), lab strain	neonate 3rd	surface	7 d		6	3 x 20 strains	?	?	probit analysis	Edgeroi NSW (F2)	LC50	LC50	Cry2Ab	Cry2Ab	199.2	ng/cm2	1	199.2										x	y	N	y	n	y	y	y
339	Bird, L, J, & Akhurst, R, J,	2007	Journal of Invertebrate Pathology, 94(2): 84-94	Variation in susceptibility of Helicoverpa armigera (Hübner) and Helicoverpa punctigera (Wallengren) (Lepidoptera: Noctuidae) in Australia to two Bacillus thuringiensis toxins	y	Australia	Lepidoptera	Noctuidae	Helicoverpa	Helicoverpa armigera	New South Wales (F1, F2, F3), Queensland F1, F2), Western Australia (F2, F3), Northern Territory (F2), lab strain	neonate 3rd	surface	7 d		6	3 x 20 strains	?	?	probit analysis	Wee Waa NSW (F1)	LC50	LC50	Cry2Ab	Cry2Ab	230	ng/cm2	1	230										x	y	N	y	n	y	y	y
339	Bird, L, J, & Akhurst, R, J,	2007	Journal of Invertebrate Pathology, 94(2): 84-94	Variation in susceptibility of Helicoverpa armigera (Hübner) and Helicoverpa punctigera (Wallengren) (Lepidoptera: Noctuidae) in Australia to two Bacillus thuringiensis toxins	y	Australia	Lepidoptera	Noctuidae	Helicoverpa	Helicoverpa armigera	New South Wales (F1, F2, F3), Queensland F1, F2), Western Australia (F2, F3), Northern Territory (F2), lab strain	neonate 3rd	surface	7 d		6	3 x 20 strains	?	?	probit analysis	Kingaroy QLD (F1)	LC50	LC50	Cry2Ab	Cry2Ab	232.7	ng/cm2	1	232.7										x	y	N	y	n	y	y	y
339	Bird, L, J, & Akhurst, R, J,	2007	Journal of Invertebrate Pathology, 94(2): 84-94	Variation in susceptibility of Helicoverpa armigera (Hübner) and Helicoverpa punctigera (Wallengren) (Lepidoptera: Noctuidae) in Australia to two Bacillus thuringiensis toxins	y	Australia	Lepidoptera	Noctuidae	Helicoverpa	Helicoverpa armigera	New South Wales (F1, F2, F3), Queensland F1, F2), Western Australia (F2, F3), Northern Territory (F2), lab strain	neonate 3rd	surface	7 d		6	3 x 20 strains	?	?	probit analysis	Emerald QLD (F1)	LC50	LC50	Cry2Ab	Cry2Ab	237.8	ng/cm2	1	237.8										x	y	N	y	n	y	y	y
339	Bird, L, J, & Akhurst, R, J,	2007	Journal of Invertebrate Pathology, 94(2): 84-94	Variation in susceptibility of Helicoverpa armigera (Hübner) and Helicoverpa punctigera (Wallengren) (Lepidoptera: Noctuidae) in Australia to two Bacillus thuringiensis toxins	y	Australia	Lepidoptera	Noctuidae	Helicoverpa	Helicoverpa armigera	New South Wales (F1, F2, F3), Queensland F1, F2), Western Australia (F2, F3), Northern Territory (F2), lab strain	neonate 3rd	surface	7 d		6	3 x 20 strains	?	?	probit analysis	Griffith NSW (F1)	LC50	LC50	Cry2Ab	Cry2Ab	420.2	ng/cm2	1	420.2										x	y	N	y	n	y	y	y
339	Bird, L, J, & Akhurst, R, J,	2007	Journal of Invertebrate Pathology, 94(2): 84-94	Variation in susceptibility of Helicoverpa armigera (Hübner) and Helicoverpa punctigera (Wallengren) (Lepidoptera: Noctuidae) in Australia to two Bacillus thuringiensis toxins	y	Australia	Lepidoptera	Noctuidae	Helicoverpa	Helicoverpa armigera	New South Wales (F1, F2, F3), Queensland F1, F2), Western Australia (F2, F3), Northern Territory (F2), lab strain	neonate 3rd	surface	7 d		6	3 x 20 strains	?	?	probit analysis	Wee Waa NSW (F1)	IC50	EC50	Cry2Ab	Cry2Ab	0.14	µg/ml	1000	140										x	y	N	y	n	y	y	y
339	Bird, L, J, & Akhurst, R, J,	2007	Journal of Invertebrate Pathology, 94(2): 84-94	Variation in susceptibility of Helicoverpa armigera (Hübner) and Helicoverpa punctigera (Wallengren) (Lepidoptera: Noctuidae) in Australia to two Bacillus thuringiensis toxins	y	Australia	Lepidoptera	Noctuidae	Helicoverpa	Helicoverpa armigera	New South Wales (F1, F2, F3), Queensland F1, F2), Western Australia (F2, F3), Northern Territory (F2), lab strain	neonate 3rd	surface	7 d		6	3 x 20 strains	?	?	probit analysis	Moree NSW (F1)	IC50	EC50	Cry2Ab	Cry2Ab	0.2	µg/ml	1000	200										x	y	N	y	n	y	y	y
339	Bird, L, J, & Akhurst, R, J,	2007	Journal of Invertebrate Pathology, 94(2): 84-94	Variation in susceptibility of Helicoverpa armigera (Hübner) and Helicoverpa punctigera (Wallengren) (Lepidoptera: Noctuidae) in Australia to two Bacillus thuringiensis toxins	y	Australia	Lepidoptera	Noctuidae	Helicoverpa	Helicoverpa armigera	New South Wales (F1, F2, F3), Queensland F1, F2), Western Australia (F2, F3), Northern Territory (F2), lab strain	neonate 3rd	surface	7 d		6	3 x 20 strains	?	?	probit analysis	Goondiwindi QLD (F1)	IC50	EC50	Cry2Ab	Cry2Ab	0.23	µg/ml	1000	230										x	y	N	y	n	y	y	y
339	Bird, L, J, & Akhurst, R, J,	2007	Journal of Invertebrate Pathology, 94(2): 84-94	Variation in susceptibility of Helicoverpa armigera (Hübner) and Helicoverpa punctigera (Wallengren) (Lepidoptera: Noctuidae) in Australia to two Bacillus thuringiensis toxins	y	Australia	Lepidoptera	Noctuidae	Helicoverpa	Helicoverpa armigera	New South Wales (F1, F2, F3), Queensland F1, F2), Western Australia (F2, F3), Northern Territory (F2), lab strain	neonate 3rd	surface	7 d		6	3 x 20 strains	?	?	probit analysis	Katherine NT (F3)	IC50	EC50	Cry2Ab	Cry2Ab	0.24	µg/ml	1000	240										x	y	N	y	n	y	y	y
339	Bird, L, J, & Akhurst, R, J,	2007	Journal of Invertebrate Pathology, 94(2): 84-94	Variation in susceptibility of Helicoverpa armigera (Hübner) and Helicoverpa punctigera (Wallengren) (Lepidoptera: Noctuidae) in Australia to two Bacillus thuringiensis toxins	y	Australia	Lepidoptera	Noctuidae	Helicoverpa	Helicoverpa armigera	New South Wales (F1, F2, F3), Queensland F1, F2), Western Australia (F2, F3), Northern Territory (F2), lab strain	neonate 3rd	surface	7 d		6	3 x 20 strains	?	?	probit analysis	Hillston NSW (F1)	IC50	EC50	Cry2Ab	Cry2Ab	0.26	µg/ml	1000	260										x	y	N	y	n	y	y	y
339	Bird, L, J, & Akhurst, R, J,	2007	Journal of Invertebrate Pathology, 94(2): 84-94	Variation in susceptibility of Helicoverpa armigera (Hübner) and Helicoverpa punctigera (Wallengren) (Lepidoptera: Noctuidae) in Australia to two Bacillus thuringiensis toxins	y	Australia	Lepidoptera	Noctuidae	Helicoverpa	Helicoverpa armigera	New South Wales (F1, F2, F3), Queensland F1, F2), Western Australia (F2, F3), Northern Territory (F2), lab strain	neonate 3rd	surface	7 d		6	3 x 20 strains	?	?	probit analysis	GriYth NSW (F1)	IC50	EC50	Cry2Ab	Cry2Ab	0.31	µg/ml	1000	310										x	y	N	y	n	y	y	y
339	Bird, L, J, & Akhurst, R, J,	2007	Journal of Invertebrate Pathology, 94(2): 84-94	Variation in susceptibility of Helicoverpa armigera (Hübner) and Helicoverpa punctigera (Wallengren) (Lepidoptera: Noctuidae) in Australia to two Bacillus thuringiensis toxins	y	Australia	Lepidoptera	Noctuidae	Helicoverpa	Helicoverpa armigera	New South Wales (F1, F2, F3), Queensland F1, F2), Western Australia (F2, F3), Northern Territory (F2), lab strain	neonate 3rd	surface	7 d		6	3 x 20 strains	?	?	probit analysis	Breeza NSW (F1)	IC50	EC50	Cry2Ab	Cry2Ab	0.33	µg/ml	1000	330										x	y	N	y	n	y	y	y
339	Bird, L, J, & Akhurst, R, J,	2007	Journal of Invertebrate Pathology, 94(2): 84-94	Variation in susceptibility of Helicoverpa armigera (Hübner) and Helicoverpa punctigera (Wallengren) (Lepidoptera: Noctuidae) in Australia to two Bacillus thuringiensis toxins	y	Australia	Lepidoptera	Noctuidae	Helicoverpa	Helicoverpa armigera	New South Wales (F1, F2, F3), Queensland F1, F2), Western Australia (F2, F3), Northern Territory (F2), lab strain	neonate 3rd	surface	7 d		6	3 x 20 strains	?	?	probit analysis	Goondiwindi QLD (F1)	IC50	EC50	Cry2Ab	Cry2Ab	0.34	µg/ml	1000	340										x	y	N	y	n	y	y	y
339	Bird, L, J, & Akhurst, R, J,	2007	Journal of Invertebrate Pathology, 94(2): 84-94	Variation in susceptibility of Helicoverpa armigera (Hübner) and Helicoverpa punctigera (Wallengren) (Lepidoptera: Noctuidae) in Australia to two Bacillus thuringiensis toxins	y	Australia	Lepidoptera	Noctuidae	Helicoverpa	Helicoverpa armigera	New South Wales (F1, F2, F3), Queensland F1, F2), Western Australia (F2, F3), Northern Territory (F2), lab strain	neonate 3rd	surface	7 d		6	3 x 20 strains	?	?	probit analysis	Wee Waa NSW (F1)	IC50	EC50	Cry2Ab	Cry2Ab	0.34	µg/ml	1000	340										x	y	N	y	n	y	y	y
339	Bird, L, J, & Akhurst, R, J,	2007	Journal of Invertebrate Pathology, 94(2): 84-94	Variation in susceptibility of Helicoverpa armigera (Hübner) and Helicoverpa punctigera (Wallengren) (Lepidoptera: Noctuidae) in Australia to two Bacillus thuringiensis toxins	y	Australia	Lepidoptera	Noctuidae	Helicoverpa	Helicoverpa armigera	New South Wales (F1, F2, F3), Queensland F1, F2), Western Australia (F2, F3), Northern Territory (F2), lab strain	neonate 3rd	surface	7 d		6	3 x 20 strains	?	?	probit analysis	St George QLD (F2)	IC50	EC50	Cry2Ab	Cry2Ab	0.35	µg/ml	1000	350										x	y	N	y	n	y	y	y
339	Bird, L, J, & Akhurst, R, J,	2007	Journal of Invertebrate Pathology, 94(2): 84-94	Variation in susceptibility of Helicoverpa armigera (Hübner) and Helicoverpa punctigera (Wallengren) (Lepidoptera: Noctuidae) in Australia to two Bacillus thuringiensis toxins	y	Australia	Lepidoptera	Noctuidae	Helicoverpa	Helicoverpa armigera	New South Wales (F1, F2, F3), Queensland F1, F2), Western Australia (F2, F3), Northern Territory (F2), lab strain	neonate 3rd	surface	7 d		6	3 x 20 strains	?	?	probit analysis	Warren NSW (F1)	IC50	EC50	Cry2Ab	Cry2Ab	0.44	µg/ml	1000	440										x	y	N	y	n	y	y	y
339	Bird, L, J, & Akhurst, R, J,	2007	Journal of Invertebrate Pathology, 94(2): 84-94	Variation in susceptibility of Helicoverpa armigera (Hübner) and Helicoverpa punctigera (Wallengren) (Lepidoptera: Noctuidae) in Australia to two Bacillus thuringiensis toxins	y	Australia	Lepidoptera	Noctuidae	Helicoverpa	Helicoverpa armigera	New South Wales (F1, F2, F3), Queensland F1, F2), Western Australia (F2, F3), Northern Territory (F2), lab strain	neonate 3rd	surface	7 d		6	3 x 20 strains	?	?	probit analysis	Emerald QLD (F1)	IC50	EC50	Cry2Ab	Cry2Ab	0.56	µg/ml	1000	560										x	y	N	y	n	y	y	y
339	Bird, L, J, & Akhurst, R, J,	2007	Journal of Invertebrate Pathology, 94(2): 84-94	Variation in susceptibility of Helicoverpa armigera (Hübner) and Helicoverpa punctigera (Wallengren) (Lepidoptera: Noctuidae) in Australia to two Bacillus thuringiensis toxins	y	Australia	Lepidoptera	Noctuidae	Helicoverpa	Helicoverpa armigera	New South Wales (F1, F2, F3), Queensland F1, F2), Western Australia (F2, F3), Northern Territory (F2), lab strain	neonate 3rd	surface	7 d		6	3 x 20 strains	?	?	probit analysis	Moree NSW (F1)	IC50	EC50	Cry2Ab	Cry2Ab	0.6	µg/ml	1000	600										x	y	N	y	n	y	y	y
7408	Brevault, T,, Prudent, P,, & Vaissayre, M,	2008	IOBC/WPRS Bulletin, 33: 37-42	Baseline susceptibility of Helicoverpa armigera (Hübner) to Bt toxins Cry1Ac and Cry2Ab2 in West Africa	n	Cameroon	Lepidoptera	Noctuidae	Helicoverpa	Helicoverpa armigera	1st, 2nd	1st instar, neonates ??	incorporation	7 d		7 each toxin	3 - 6	24 each toxin	2016 each toxin and locality = 56448	WinDL V2,0		LC50	LC50	Cry1Ac, MVPII protoxin	Cry1Ac	1.1	µg/ml	1000	1100			0,2 - 2,28,							x	y	N	n	y	y	y	y
7408	Brevault, T,, Prudent, P,, & Vaissayre, M,	2008	IOBC/WPRS Bulletin, 33: 37-43	Baseline susceptibility of Helicoverpa armigera (Hübner) to Bt toxins Cry1Ac and Cry2Ab2 in West Africa	n	Cameroon	Lepidoptera	Noctuidae	Helicoverpa	Helicoverpa armigera	1st, 2nd	1st instar, neonates ??	incorporation	7 d		7 each toxin	3 - 6	24 each toxin	2016 each toxin and locality = 56448	WinDL V2,0		GI50	EC50	Cry1Ac, MVPII protoxin	Cry1Ac	0.15	µg/ml	1000	150			0,05-0,38							x	y	N	n	y	y	y	y
7408	Brevault, T,, Prudent, P,, & Vaissayre, M,	2008	IOBC/WPRS Bulletin, 33: 37-44	Baseline susceptibility of Helicoverpa armigera (Hübner) to Bt toxins Cry1Ac and Cry2Ab2 in West Africa	n	Cameroon	Lepidoptera	Noctuidae	Helicoverpa	Helicoverpa armigera	1st, 2nd	1st instar, neonates ??	incorporation	7 d		7 each toxin	3 - 6	24 each toxin	2016 each toxin and locality = 56448	WinDL V2,0		LC50	LC50	Cry2Ab	Cry2Ab	2.14	µg/ml	1000	2140			0,65 - 5,9							x	y	N	n	y	y	y	y
7408	Brevault, T,, Prudent, P,, & Vaissayre, M,	2008	IOBC/WPRS Bulletin, 33: 37-45	Baseline susceptibility of Helicoverpa armigera (Hübner) to Bt toxins Cry1Ac and Cry2Ab2 in West Africa	n	Cameroon	Lepidoptera	Noctuidae	Helicoverpa	Helicoverpa armigera	1st, 2nd	1st instar, neonates ??	incorporation	7 d		7 each toxin	3 - 6	24 each toxin	2016 each toxin and locality = 56448	WinDL V2,0		GI50	EC50	Cry2Ab	Cry2Ab	0.26	µg/ml	1000	260			0,04-0,55							x	y	N	n	y	y	y	y
1196	Brevault, T,, Prudent, P,, Vaissayre, M,, & Carriere, Y,	2009	Journal of Economic Entomology, 102(6): 2301-2309	Susceptibility of Helicoverpa armigera (Lepidoptera: Noctuidae) to Cry1Ac and Cry2Ab2 Insecticidal Proteins in Four Countries of the West African Cotton Belt	y	Benin	Lepidoptera	Noctuidae	Helicoverpa	Helicoverpa armigera	1st, 2nd	neonates	incorporation	7 d		7 (8) each toxin	up to 5	24 each toxin	7870	probit analysis	Benin Gomparou	LC50	LC50	Cry1Ac, MVPII protoxin	Cry1Ac	0.38	µg/ml	1000	380			0,04 - 1,10				1	10.8		x	y	N	n	y	y	y	y
1196	Brevault, T,, Prudent, P,, Vaissayre, M,, & Carriere, Y,	2009	Journal of Economic Entomology, 102(6): 2301-2309	Susceptibility of Helicoverpa armigera (Lepidoptera: Noctuidae) to Cry1Ac and Cry2Ab2 Insecticidal Proteins in Four Countries of the West African Cotton Belt	y	Benin	Lepidoptera	Noctuidae	Helicoverpa	Helicoverpa armigera	1st, 2nd	neonates	incorporation	7 d		7 (8) each toxin	up to 5	24 each toxin	7870		Benin Attogon	LC50	LC50	Cry1Ac, MVPII protoxin	Cry1Ac	1.8	µg/ml	1000	1800			1,14 - 2,60				1.4	8.1		x	y	N	n	y	y	y	y
1196	Brevault, T,, Prudent, P,, Vaissayre, M,, & Carriere, Y,	2009	Journal of Economic Entomology, 102(6): 2301-2309	Susceptibility of Helicoverpa armigera (Lepidoptera: Noctuidae) to Cry1Ac and Cry2Ab2 Insecticidal Proteins in Four Countries of the West African Cotton Belt	y	Benin	Lepidoptera	Noctuidae	Helicoverpa	Helicoverpa armigera	1st, 2nd	neonates	incorporation	7 d		7 (8) each toxin	up to 5	24 each toxin	7870		Benin Sehoue	LC50	LC50	Cry1Ac, MVPII protoxin	Cry1Ac	16.71	µg/ml	1000	16710			5,34 - 390				0.8	6.7		x	y	N	n	y	y	y	y
1196	Brevault, T,, Prudent, P,, Vaissayre, M,, & Carriere, Y,	2009	Journal of Economic Entomology, 102(6): 2301-2309	Susceptibility of Helicoverpa armigera (Lepidoptera: Noctuidae) to Cry1Ac and Cry2Ab2 Insecticidal Proteins in Four Countries of the West African Cotton Belt	y	Cameroon	Lepidoptera	Noctuidae	Helicoverpa	Helicoverpa armigera	1st, 2nd	neonates	incorporation	7 d		7 (8) each toxin	up to 5	24 each toxin	7870		Cameroon Djalingo	LC50	LC50	Cry1Ac, MVPII protoxin	Cry1Ac	6.86	µg/ml	1000	6860			4,35 - 9,36				2.2	2.6		x	y	N	n	y	y	y	y
1196	Brevault, T,, Prudent, P,, Vaissayre, M,, & Carriere, Y,	2009	Journal of Economic Entomology, 102(6): 2301-2309	Susceptibility of Helicoverpa armigera (Lepidoptera: Noctuidae) to Cry1Ac and Cry2Ab2 Insecticidal Proteins in Four Countries of the West African Cotton Belt	y	Cameroon	Lepidoptera	Noctuidae	Helicoverpa	Helicoverpa armigera	1st, 2nd	neonates	incorporation	7 d		7 (8) each toxin	up to 5	24 each toxin	7870		Cameroon Gaschiga	LC50	LC50	Cry1Ac, MVPII protoxin	Cry1Ac	4.57	µg/ml	1000	4570			0,58 - 9,48				0.9	2.2		x	y	N	n	y	y	y	y
1196	Brevault, T,, Prudent, P,, Vaissayre, M,, & Carriere, Y,	2009	Journal of Economic Entomology, 102(6): 2301-2309	Susceptibility of Helicoverpa armigera (Lepidoptera: Noctuidae) to Cry1Ac and Cry2Ab2 Insecticidal Proteins in Four Countries of the West African Cotton Belt	y	Cameroon	Lepidoptera	Noctuidae	Helicoverpa	Helicoverpa armigera	1st, 2nd	neonates	incorporation	7 d		7 (8) each toxin	up to 5	24 each toxin	7870		Cameroon Guider	LC50	LC50	Cry1Ac, MVPII protoxin	Cry1Ac	5.31	µg/ml	1000	5310			3,45 - 8,76				0.9	3.4		x	y	N	n	y	y	y	y
1196	Brevault, T,, Prudent, P,, Vaissayre, M,, & Carriere, Y,	2009	Journal of Economic Entomology, 102(6): 2301-2309	Susceptibility of Helicoverpa armigera (Lepidoptera: Noctuidae) to Cry1Ac and Cry2Ab2 Insecticidal Proteins in Four Countries of the West African Cotton Belt	y	Cameroon	Lepidoptera	Noctuidae	Helicoverpa	Helicoverpa armigera	1st, 2nd	neonates	incorporation	7 d		7 (8) each toxin	up to 5	24 each toxin	7870		Cameroon Mokong	LC50	LC50	Cry1Ac, MVPII protoxin	Cry1Ac	6.2	µg/ml	1000	6200			4,11 - 9,40				1.9	1.4		x	y	N	n	y	y	y	y
1196	Brevault, T,, Prudent, P,, Vaissayre, M,, & Carriere, Y,	2009	Journal of Economic Entomology, 102(6): 2301-2309	Susceptibility of Helicoverpa armigera (Lepidoptera: Noctuidae) to Cry1Ac and Cry2Ab2 Insecticidal Proteins in Four Countries of the West African Cotton Belt	y	Cameroon	Lepidoptera	Noctuidae	Helicoverpa	Helicoverpa armigera	1st, 2nd	neonates	incorporation	7 d		7 (8) each toxin	up to 5	24 each toxin	7870		Cameroon Tchatibali	LC50	LC50	Cry1Ac, MVPII protoxin	Cry1Ac	4.67	µg/ml	1000	4670			1,94 - 7,50				1.6	4.8		x	y	N	n	y	y	y	y
1196	Brevault, T,, Prudent, P,, Vaissayre, M,, & Carriere, Y,	2009	Journal of Economic Entomology, 102(6): 2301-2309	Susceptibility of Helicoverpa armigera (Lepidoptera: Noctuidae) to Cry1Ac and Cry2Ab2 Insecticidal Proteins in Four Countries of the West African Cotton Belt	y	Cameroon	Lepidoptera	Noctuidae	Helicoverpa	Helicoverpa armigera	1st, 2nd	neonates	incorporation	7 d		7 (8) each toxin	up to 5	24 each toxin	7870		Cameroon Tchollire	LC50	LC50	Cry1Ac, MVPII protoxin	Cry1Ac	7.71	µg/ml	1000	7710			0,77 - 28,15				0.5	4		x	y	N	n	y	y	y	y
1196	Brevault, T,, Prudent, P,, Vaissayre, M,, & Carriere, Y,	2009	Journal of Economic Entomology, 102(6): 2301-2309	Susceptibility of Helicoverpa armigera (Lepidoptera: Noctuidae) to Cry1Ac and Cry2Ab2 Insecticidal Proteins in Four Countries of the West African Cotton Belt	y	Cameroon	Lepidoptera	Noctuidae	Helicoverpa	Helicoverpa armigera	1st, 2nd	neonates	incorporation	7 d		7 (8) each toxin	up to 5	24 each toxin	7870		Cameroon Mokong	LC50	LC50	Cry1Ac, MVPII protoxin	Cry1Ac	6.88	µg/ml	1000	6880			4,54 - 9,02				3.1	4.7		x	y	N	n	y	y	y	y
1196	Brevault, T,, Prudent, P,, Vaissayre, M,, & Carriere, Y,	2009	Journal of Economic Entomology, 102(6): 2301-2309	Susceptibility of Helicoverpa armigera (Lepidoptera: Noctuidae) to Cry1Ac and Cry2Ab2 Insecticidal Proteins in Four Countries of the West African Cotton Belt	y	Cameroon	Lepidoptera	Noctuidae	Helicoverpa	Helicoverpa armigera	1st, 2nd	neonates	incorporation	7 d		7 (8) each toxin	up to 5	24 each toxin	7870		Cameroon Tchollire	LC50	LC50	Cry1Ac, MVPII protoxin	Cry1Ac	8.31	µg/ml	1000	8310			5,37 - 11,41				2.6	10.9		x	y	N	n	y	y	y	y
1196	Brevault, T,, Prudent, P,, Vaissayre, M,, & Carriere, Y,	2009	Journal of Economic Entomology, 102(6): 2301-2309	Susceptibility of Helicoverpa armigera (Lepidoptera: Noctuidae) to Cry1Ac and Cry2Ab2 Insecticidal Proteins in Four Countries of the West African Cotton Belt	y	Cameroon	Lepidoptera	Noctuidae	Helicoverpa	Helicoverpa armigera	1st, 2nd	neonates	incorporation	7 d		7 (8) each toxin	up to 5	24 each toxin	7870		Cameroon Gaschiga	LC50	LC50	Cry1Ac, MVPII protoxin	Cry1Ac	5.29	µg/ml	1000	5290			4,54 - 7,34				2.8	5		x	y	N	n	y	y	y	y
1196	Brevault, T,, Prudent, P,, Vaissayre, M,, & Carriere, Y,	2009	Journal of Economic Entomology, 102(6): 2301-2309	Susceptibility of Helicoverpa armigera (Lepidoptera: Noctuidae) to Cry1Ac and Cry2Ab2 Insecticidal Proteins in Four Countries of the West African Cotton Belt	y	Chad	Lepidoptera	Noctuidae	Helicoverpa	Helicoverpa armigera	1st, 2nd	neonates	incorporation	7 d		7 (8) each toxin	up to 5	24 each toxin	7870		Chad Doba	LC50	LC50	Cry1Ac, MVPII protoxin	Cry1Ac	2.87	µg/ml	1000	2870			1,99 - 4,14				1.1	5.9		x	y	N	n	y	y	y	y
1196	Brevault, T,, Prudent, P,, Vaissayre, M,, & Carriere, Y,	2009	Journal of Economic Entomology, 102(6): 2301-2309	Susceptibility of Helicoverpa armigera (Lepidoptera: Noctuidae) to Cry1Ac and Cry2Ab2 Insecticidal Proteins in Four Countries of the West African Cotton Belt	y	Chad	Lepidoptera	Noctuidae	Helicoverpa	Helicoverpa armigera	1st, 2nd	neonates	incorporation	7 d		7 (8) each toxin	up to 5	24 each toxin	7870		Chad Sorga	LC50	LC50	Cry1Ac, MVPII protoxin	Cry1Ac	3.26	µg/ml	1000	3260			1,72 - 5,67				0.9	0.9		x	y	N	n	y	y	y	y
1196	Brevault, T,, Prudent, P,, Vaissayre, M,, & Carriere, Y,	2009	Journal of Economic Entomology, 102(6): 2301-2309	Susceptibility of Helicoverpa armigera (Lepidoptera: Noctuidae) to Cry1Ac and Cry2Ab2 Insecticidal Proteins in Four Countries of the West African Cotton Belt	y	Nigeria	Lepidoptera	Noctuidae	Helicoverpa	Helicoverpa armigera	1st, 2nd	neonates	incorporation	7 d		7 (8) each toxin	up to 5	24 each toxin	7870		Nigeria Gombe	LC50	LC50	Cry1Ac, MVPII protoxin	Cry1Ac	8.64	µg/ml	1000	8640			6,24 - 11,56				2.1	0.1		x	y	N	n	y	y	y	y
1196	Brevault, T,, Prudent, P,, Vaissayre, M,, & Carriere, Y,	2009	Journal of Economic Entomology, 102(6): 2301-2309	Susceptibility of Helicoverpa armigera (Lepidoptera: Noctuidae) to Cry1Ac and Cry2Ab2 Insecticidal Proteins in Four Countries of the West African Cotton Belt	y	Benin	Lepidoptera	Noctuidae	Helicoverpa	Helicoverpa armigera	1st, 2nd	neonates	incorporation	7 d		7 (8) each toxin	up to 5	24 each toxin	6912		Benin Gomparou	LC50	LC50	Cry2Ab2	Cry2Ab2	6.15	µg/ml	1000	6150			3,37 - 9,54				2.2	1		x	y	N	n	y	y	y	y
1196	Brevault, T,, Prudent, P,, Vaissayre, M,, & Carriere, Y,	2009	Journal of Economic Entomology, 102(6): 2301-2309	Susceptibility of Helicoverpa armigera (Lepidoptera: Noctuidae) to Cry1Ac and Cry2Ab2 Insecticidal Proteins in Four Countries of the West African Cotton Belt	y	Benin	Lepidoptera	Noctuidae	Helicoverpa	Helicoverpa armigera	1st, 2nd	neonates	incorporation	7 d		7 (8) each toxin	up to 5	24 each toxin	6912		Benin Attogon	LC50	LC50	Cry2Ab2	Cry2Ab2	50.71	µg/ml	1000	50710	Ausreißer, aber nicht resistent		21,84 - 936				0.9	4.9		x	y	N	n	y	y	y	y
1196	Brevault, T,, Prudent, P,, Vaissayre, M,, & Carriere, Y,	2009	Journal of Economic Entomology, 102(6): 2301-2309	Susceptibility of Helicoverpa armigera (Lepidoptera: Noctuidae) to Cry1Ac and Cry2Ab2 Insecticidal Proteins in Four Countries of the West African Cotton Belt	y	Benin	Lepidoptera	Noctuidae	Helicoverpa	Helicoverpa armigera	1st, 2nd	neonates	incorporation	7 d		7 (8) each toxin	up to 5	24 each toxin	6912		Benin Sehoue	LC50	LC50	Cry2Ab2	Cry2Ab2	34	µg/ml	1000	34000	Ausreißer, aber nicht resistent		0,68 - 179				0.4	2.1		x	y	N	n	y	y	y	y
1196	Brevault, T,, Prudent, P,, Vaissayre, M,, & Carriere, Y,	2009	Journal of Economic Entomology, 102(6): 2301-2309	Susceptibility of Helicoverpa armigera (Lepidoptera: Noctuidae) to Cry1Ac and Cry2Ab2 Insecticidal Proteins in Four Countries of the West African Cotton Belt	y	Cameroon	Lepidoptera	Noctuidae	Helicoverpa	Helicoverpa armigera	1st, 2nd	neonates	incorporation	7 d		7 (8) each toxin	up to 5	24 each toxin	6912		Cameroon Djalingo	LC50	LC50	Cry2Ab2	Cry2Ab2	8.48	µg/ml	1000	8480			5,86 - 11,07				2.1	4		x	y	N	n	y	y	y	y
1196	Brevault, T,, Prudent, P,, Vaissayre, M,, & Carriere, Y,	2009	Journal of Economic Entomology, 102(6): 2301-2309	Susceptibility of Helicoverpa armigera (Lepidoptera: Noctuidae) to Cry1Ac and Cry2Ab2 Insecticidal Proteins in Four Countries of the West African Cotton Belt	y	Cameroon	Lepidoptera	Noctuidae	Helicoverpa	Helicoverpa armigera	1st, 2nd	neonates	incorporation	7 d		7 (8) each toxin	up to 5	24 each toxin	6912		Cameroon Gaschiga	LC50	LC50	Cry2Ab2	Cry2Ab2	11.42	µg/ml	1000	11420			8,51 - 14,81				2.5	3.8		x	y	N	n	y	y	y	y
1196	Brevault, T,, Prudent, P,, Vaissayre, M,, & Carriere, Y,	2009	Journal of Economic Entomology, 102(6): 2301-2309	Susceptibility of Helicoverpa armigera (Lepidoptera: Noctuidae) to Cry1Ac and Cry2Ab2 Insecticidal Proteins in Four Countries of the West African Cotton Belt	y	Cameroon	Lepidoptera	Noctuidae	Helicoverpa	Helicoverpa armigera	1st, 2nd	neonates	incorporation	7 d		7 (8) each toxin	up to 5	24 each toxin	6912		Cameroon Guider	LC50	LC50	Cry2Ab2	Cry2Ab2	7.03	µg/ml	1000	7030			4,77 - 11,46				1	9.1		x	y	N	n	y	y	y	y
1196	Brevault, T,, Prudent, P,, Vaissayre, M,, & Carriere, Y,	2009	Journal of Economic Entomology, 102(6): 2301-2309	Susceptibility of Helicoverpa armigera (Lepidoptera: Noctuidae) to Cry1Ac and Cry2Ab2 Insecticidal Proteins in Four Countries of the West African Cotton Belt	y	Cameroon	Lepidoptera	Noctuidae	Helicoverpa	Helicoverpa armigera	1st, 2nd	neonates	incorporation	7 d		7 (8) each toxin	up to 5	24 each toxin	6912		Cameroon Mokong	LC50	LC50	Cry2Ab2	Cry2Ab2	6.97	µg/ml	1000	6970			4,54 - 9,02				3.1	4.7		x	y	N	n	y	y	y	y
1196	Brevault, T,, Prudent, P,, Vaissayre, M,, & Carriere, Y,	2009	Journal of Economic Entomology, 102(6): 2301-2309	Susceptibility of Helicoverpa armigera (Lepidoptera: Noctuidae) to Cry1Ac and Cry2Ab2 Insecticidal Proteins in Four Countries of the West African Cotton Belt	y	Cameroon	Lepidoptera	Noctuidae	Helicoverpa	Helicoverpa armigera	1st, 2nd	neonates	incorporation	7 d		7 (8) each toxin	up to 5	24 each toxin	6912		Cameroon Tchatibali	LC50	LC50	Cry2Ab2	Cry2Ab2	5.12	µg/ml	1000	5120			3,23 - 6,92				2.2	3.9		x	y	N	n	y	y	y	y
1196	Brevault, T,, Prudent, P,, Vaissayre, M,, & Carriere, Y,	2009	Journal of Economic Entomology, 102(6): 2301-2309	Susceptibility of Helicoverpa armigera (Lepidoptera: Noctuidae) to Cry1Ac and Cry2Ab2 Insecticidal Proteins in Four Countries of the West African Cotton Belt	y	Cameroon	Lepidoptera	Noctuidae	Helicoverpa	Helicoverpa armigera	1st, 2nd	neonates	incorporation	7 d		7 (8) each toxin	up to 5	24 each toxin	6912		Cameroon Tchollire	LC50	LC50	Cry2Ab2	Cry2Ab2	20.91	µg/ml	1000	20910			12,61 - 60,82				1.2	5.1		x	y	N	n	y	y	y	y
1196	Brevault, T,, Prudent, P,, Vaissayre, M,, & Carriere, Y,	2009	Journal of Economic Entomology, 102(6): 2301-2309	Susceptibility of Helicoverpa armigera (Lepidoptera: Noctuidae) to Cry1Ac and Cry2Ab2 Insecticidal Proteins in Four Countries of the West African Cotton Belt	y	Cameroon	Lepidoptera	Noctuidae	Helicoverpa	Helicoverpa armigera	1st, 2nd	neonates	incorporation	7 d		7 (8) each toxin	up to 5	24 each toxin	6912		Cameroon Mokong	LC50	LC50	Cry2Ab2	Cry2Ab2	13.9	µg/ml	1000	13900			9,99 - 21,47				1.6	4		x	y	N	n	y	y	y	y
1196	Brevault, T,, Prudent, P,, Vaissayre, M,, & Carriere, Y,	2009	Journal of Economic Entomology, 102(6): 2301-2309	Susceptibility of Helicoverpa armigera (Lepidoptera: Noctuidae) to Cry1Ac and Cry2Ab2 Insecticidal Proteins in Four Countries of the West African Cotton Belt	y	Cameroon	Lepidoptera	Noctuidae	Helicoverpa	Helicoverpa armigera	1st, 2nd	neonates	incorporation	7 d		7 (8) each toxin	up to 5	24 each toxin	6912		Cameroon Tchollire	LC50	LC50	Cry2Ab2	Cry2Ab2	6.72	µg/ml	1000	6720			3,96 - 10,18				1.5	7.9		x	y	N	n	y	y	y	y
1196	Brevault, T,, Prudent, P,, Vaissayre, M,, & Carriere, Y,	2009	Journal of Economic Entomology, 102(6): 2301-2309	Susceptibility of Helicoverpa armigera (Lepidoptera: Noctuidae) to Cry1Ac and Cry2Ab2 Insecticidal Proteins in Four Countries of the West African Cotton Belt	y	Cameroon	Lepidoptera	Noctuidae	Helicoverpa	Helicoverpa armigera	1st, 2nd	neonates	incorporation	7 d		7 (8) each toxin	up to 5	24 each toxin	6912		Cameroon Gaschiga	LC50	LC50	Cry2Ab2	Cry2Ab2	9.75	µg/ml	1000	9750			3,60 - 1084				1	9.3		x	y	N	n	y	y	y	y
1196	Brevault, T,, Prudent, P,, Vaissayre, M,, & Carriere, Y,	2009	Journal of Economic Entomology, 102(6): 2301-2309	Susceptibility of Helicoverpa armigera (Lepidoptera: Noctuidae) to Cry1Ac and Cry2Ab2 Insecticidal Proteins in Four Countries of the West African Cotton Belt	y	Chad	Lepidoptera	Noctuidae	Helicoverpa	Helicoverpa armigera	1st, 2nd	neonates	incorporation	7 d		7 (8) each toxin	up to 5	24 each toxin	6912		Chad Doba	LC50	LC50	Cry2Ab2	Cry2Ab2	7.85	µg/ml	1000	7850			0,43 - 18,27				2.3	19.8		x	y	N	n	y	y	y	y
1196	Brevault, T,, Prudent, P,, Vaissayre, M,, & Carriere, Y,	2009	Journal of Economic Entomology, 102(6): 2301-2309	Susceptibility of Helicoverpa armigera (Lepidoptera: Noctuidae) to Cry1Ac and Cry2Ab2 Insecticidal Proteins in Four Countries of the West African Cotton Belt	y	Chad	Lepidoptera	Noctuidae	Helicoverpa	Helicoverpa armigera	1st, 2nd	neonates	incorporation	7 d		7 (8) each toxin	up to 5	24 each toxin	6912		Chad Sorga	LC50	LC50	Cry2Ab2	Cry2Ab2	9.02	µg/ml	1000	9020			6,43 - 12,34				1.8	4.2		x	y	N	n	y	y	y	y
1196	Brevault, T,, Prudent, P,, Vaissayre, M,, & Carriere, Y,	2009	Journal of Economic Entomology, 102(6): 2301-2309	Susceptibility of Helicoverpa armigera (Lepidoptera: Noctuidae) to Cry1Ac and Cry2Ab2 Insecticidal Proteins in Four Countries of the West African Cotton Belt	y	Benin	Lepidoptera	Noctuidae	Helicoverpa	Helicoverpa armigera	1st, 2nd	neonates	incorporation	7 d		7 (8) each toxin	up to 5	24 each toxin	7870	probit analysis	Benin Gomparou	IC50	EC50	Cry1Ac, MVPII protoxin	Cry1Ac	0.13	µg/ml	1000	130										x	y	N	n	y	y	y	y
1196	Brevault, T,, Prudent, P,, Vaissayre, M,, & Carriere, Y,	2009	Journal of Economic Entomology, 102(6): 2301-2309	Susceptibility of Helicoverpa armigera (Lepidoptera: Noctuidae) to Cry1Ac and Cry2Ab2 Insecticidal Proteins in Four Countries of the West African Cotton Belt	y	Benin	Lepidoptera	Noctuidae	Helicoverpa	Helicoverpa armigera	1st, 2nd	neonates	incorporation	7 d		7 (8) each toxin	up to 5	24 each toxin	7870		Benin Attogon	IC50	EC50	Cry1Ac, MVPII protoxin	Cry1Ac	0.91	µg/ml	1000	910										x	y	N	n	y	y	y	y
1196	Brevault, T,, Prudent, P,, Vaissayre, M,, & Carriere, Y,	2009	Journal of Economic Entomology, 102(6): 2301-2309	Susceptibility of Helicoverpa armigera (Lepidoptera: Noctuidae) to Cry1Ac and Cry2Ab2 Insecticidal Proteins in Four Countries of the West African Cotton Belt	y	Benin	Lepidoptera	Noctuidae	Helicoverpa	Helicoverpa armigera	1st, 2nd	neonates	incorporation	7 d		7 (8) each toxin	up to 5	24 each toxin	7870		Benin Sehoue	IC50	EC50	Cry1Ac, MVPII protoxin	Cry1Ac	3	µg/ml	1000	3000										x	y	N	n	y	y	y	y
1196	Brevault, T,, Prudent, P,, Vaissayre, M,, & Carriere, Y,	2009	Journal of Economic Entomology, 102(6): 2301-2309	Susceptibility of Helicoverpa armigera (Lepidoptera: Noctuidae) to Cry1Ac and Cry2Ab2 Insecticidal Proteins in Four Countries of the West African Cotton Belt	y	Cameroon	Lepidoptera	Noctuidae	Helicoverpa	Helicoverpa armigera	1st, 2nd	neonates	incorporation	7 d		7 (8) each toxin	up to 5	24 each toxin	7870		Cameroon Djalingo	IC50	EC50	Cry1Ac, MVPII protoxin	Cry1Ac	1.52	µg/ml	1000	1520										x	y	N	n	y	y	y	y
1196	Brevault, T,, Prudent, P,, Vaissayre, M,, & Carriere, Y,	2009	Journal of Economic Entomology, 102(6): 2301-2309	Susceptibility of Helicoverpa armigera (Lepidoptera: Noctuidae) to Cry1Ac and Cry2Ab2 Insecticidal Proteins in Four Countries of the West African Cotton Belt	y	Cameroon	Lepidoptera	Noctuidae	Helicoverpa	Helicoverpa armigera	1st, 2nd	neonates	incorporation	7 d		7 (8) each toxin	up to 5	24 each toxin	7870		Cameroon Gaschiga	IC50	EC50	Cry1Ac, MVPII protoxin	Cry1Ac	0.62	µg/ml	1000	620										x	y	N	n	y	y	y	y
1196	Brevault, T,, Prudent, P,, Vaissayre, M,, & Carriere, Y,	2009	Journal of Economic Entomology, 102(6): 2301-2309	Susceptibility of Helicoverpa armigera (Lepidoptera: Noctuidae) to Cry1Ac and Cry2Ab2 Insecticidal Proteins in Four Countries of the West African Cotton Belt	y	Cameroon	Lepidoptera	Noctuidae	Helicoverpa	Helicoverpa armigera	1st, 2nd	neonates	incorporation	7 d		7 (8) each toxin	up to 5	24 each toxin	7870		Cameroon Guider	IC50	EC50	Cry1Ac, MVPII protoxin	Cry1Ac	1.05	µg/ml	1000	1050										x	y	N	n	y	y	y	y
1196	Brevault, T,, Prudent, P,, Vaissayre, M,, & Carriere, Y,	2009	Journal of Economic Entomology, 102(6): 2301-2309	Susceptibility of Helicoverpa armigera (Lepidoptera: Noctuidae) to Cry1Ac and Cry2Ab2 Insecticidal Proteins in Four Countries of the West African Cotton Belt	y	Cameroon	Lepidoptera	Noctuidae	Helicoverpa	Helicoverpa armigera	1st, 2nd	neonates	incorporation	7 d		7 (8) each toxin	up to 5	24 each toxin	7870		Cameroon Mokong	IC50	EC50	Cry1Ac, MVPII protoxin	Cry1Ac	1.59	µg/ml	1000	1590										x	y	N	n	y	y	y	y
1196	Brevault, T,, Prudent, P,, Vaissayre, M,, & Carriere, Y,	2009	Journal of Economic Entomology, 102(6): 2301-2309	Susceptibility of Helicoverpa armigera (Lepidoptera: Noctuidae) to Cry1Ac and Cry2Ab2 Insecticidal Proteins in Four Countries of the West African Cotton Belt	y	Cameroon	Lepidoptera	Noctuidae	Helicoverpa	Helicoverpa armigera	1st, 2nd	neonates	incorporation	7 d		7 (8) each toxin	up to 5	24 each toxin	7870		Cameroon Tchatibali	IC50	EC50	Cry1Ac, MVPII protoxin	Cry1Ac	1.41	µg/ml	1000	1410										x	y	N	n	y	y	y	y
1196	Brevault, T,, Prudent, P,, Vaissayre, M,, & Carriere, Y,	2009	Journal of Economic Entomology, 102(6): 2301-2309	Susceptibility of Helicoverpa armigera (Lepidoptera: Noctuidae) to Cry1Ac and Cry2Ab2 Insecticidal Proteins in Four Countries of the West African Cotton Belt	y	Cameroon	Lepidoptera	Noctuidae	Helicoverpa	Helicoverpa armigera	1st, 2nd	neonates	incorporation	7 d		7 (8) each toxin	up to 5	24 each toxin	7870		Cameroon Tchollire	IC50	EC50	Cry1Ac, MVPII protoxin	Cry1Ac	1.24	µg/ml	1000	1240										x	y	N	n	y	y	y	y
1196	Brevault, T,, Prudent, P,, Vaissayre, M,, & Carriere, Y,	2009	Journal of Economic Entomology, 102(6): 2301-2309	Susceptibility of Helicoverpa armigera (Lepidoptera: Noctuidae) to Cry1Ac and Cry2Ab2 Insecticidal Proteins in Four Countries of the West African Cotton Belt	y	Cameroon	Lepidoptera	Noctuidae	Helicoverpa	Helicoverpa armigera	1st, 2nd	neonates	incorporation	7 d		7 (8) each toxin	up to 5	24 each toxin	7870		Cameroon Mokong	IC50	EC50	Cry1Ac, MVPII protoxin	Cry1Ac	0.93	µg/ml	1000	930										x	y	N	n	y	y	y	y
1196	Brevault, T,, Prudent, P,, Vaissayre, M,, & Carriere, Y,	2009	Journal of Economic Entomology, 102(6): 2301-2309	Susceptibility of Helicoverpa armigera (Lepidoptera: Noctuidae) to Cry1Ac and Cry2Ab2 Insecticidal Proteins in Four Countries of the West African Cotton Belt	y	Cameroon	Lepidoptera	Noctuidae	Helicoverpa	Helicoverpa armigera	1st, 2nd	neonates	incorporation	7 d		7 (8) each toxin	up to 5	24 each toxin	7870		Cameroon Tchollire	IC50	EC50	Cry1Ac, MVPII protoxin	Cry1Ac	0.65	µg/ml	1000	650										x	y	N	n	y	y	y	y
1196	Brevault, T,, Prudent, P,, Vaissayre, M,, & Carriere, Y,	2009	Journal of Economic Entomology, 102(6): 2301-2309	Susceptibility of Helicoverpa armigera (Lepidoptera: Noctuidae) to Cry1Ac and Cry2Ab2 Insecticidal Proteins in Four Countries of the West African Cotton Belt	y	Cameroon	Lepidoptera	Noctuidae	Helicoverpa	Helicoverpa armigera	1st, 2nd	neonates	incorporation	7 d		7 (8) each toxin	up to 5	24 each toxin	7870		Cameroon Gaschiga	IC50	EC50	Cry1Ac, MVPII protoxin	Cry1Ac	0.34	µg/ml	1000	340										x	y	N	n	y	y	y	y
1196	Brevault, T,, Prudent, P,, Vaissayre, M,, & Carriere, Y,	2009	Journal of Economic Entomology, 102(6): 2301-2309	Susceptibility of Helicoverpa armigera (Lepidoptera: Noctuidae) to Cry1Ac and Cry2Ab2 Insecticidal Proteins in Four Countries of the West African Cotton Belt	y	Chad	Lepidoptera	Noctuidae	Helicoverpa	Helicoverpa armigera	1st, 2nd	neonates	incorporation	7 d		7 (8) each toxin	up to 5	24 each toxin	7870		Chad Doba	IC50	EC50	Cry1Ac, MVPII protoxin	Cry1Ac	0.53	µg/ml	1000	530										x	y	N	n	y	y	y	y
1196	Brevault, T,, Prudent, P,, Vaissayre, M,, & Carriere, Y,	2009	Journal of Economic Entomology, 102(6): 2301-2309	Susceptibility of Helicoverpa armigera (Lepidoptera: Noctuidae) to Cry1Ac and Cry2Ab2 Insecticidal Proteins in Four Countries of the West African Cotton Belt	y	Chad	Lepidoptera	Noctuidae	Helicoverpa	Helicoverpa armigera	1st, 2nd	neonates	incorporation	7 d		7 (8) each toxin	up to 5	24 each toxin	7870		Chad Sorga	IC50	EC50	Cry1Ac, MVPII protoxin	Cry1Ac	1.08	µg/ml	1000	1080										x	y	N	n	y	y	y	y
1196	Brevault, T,, Prudent, P,, Vaissayre, M,, & Carriere, Y,	2009	Journal of Economic Entomology, 102(6): 2301-2309	Susceptibility of Helicoverpa armigera (Lepidoptera: Noctuidae) to Cry1Ac and Cry2Ab2 Insecticidal Proteins in Four Countries of the West African Cotton Belt	y	Nigeria	Lepidoptera	Noctuidae	Helicoverpa	Helicoverpa armigera	1st, 2nd	neonates	incorporation	7 d		7 (8) each toxin	up to 5	24 each toxin	7870		Nigeria Gombe	IC50	EC50	Cry1Ac, MVPII protoxin	Cry1Ac	1.14	µg/ml	1000	1140										x	y	N	n	y	y	y	y
1196	Brevault, T,, Prudent, P,, Vaissayre, M,, & Carriere, Y,	2009	Journal of Economic Entomology, 102(6): 2301-2309	Susceptibility of Helicoverpa armigera (Lepidoptera: Noctuidae) to Cry1Ac and Cry2Ab2 Insecticidal Proteins in Four Countries of the West African Cotton Belt	y	Benin	Lepidoptera	Noctuidae	Helicoverpa	Helicoverpa armigera	1st, 2nd	neonates	incorporation	7 d		7 (8) each toxin	up to 5	24 each toxin	6912		Benin Gomparou	IC50	EC50	Cry2Ab2	Cry2Ab2	2.88	µg/ml	1000	2880										x	y	N	n	y	y	y	y
1196	Brevault, T,, Prudent, P,, Vaissayre, M,, & Carriere, Y,	2009	Journal of Economic Entomology, 102(6): 2301-2309	Susceptibility of Helicoverpa armigera (Lepidoptera: Noctuidae) to Cry1Ac and Cry2Ab2 Insecticidal Proteins in Four Countries of the West African Cotton Belt	y	Benin	Lepidoptera	Noctuidae	Helicoverpa	Helicoverpa armigera	1st, 2nd	neonates	incorporation	7 d		7 (8) each toxin	up to 5	24 each toxin	6912		Benin Attogon	IC50	EC50	Cry2Ab2	Cry2Ab2	8.72	µg/ml	1000	8720										x	y	N	n	y	y	y	y
1196	Brevault, T,, Prudent, P,, Vaissayre, M,, & Carriere, Y,	2009	Journal of Economic Entomology, 102(6): 2301-2309	Susceptibility of Helicoverpa armigera (Lepidoptera: Noctuidae) to Cry1Ac and Cry2Ab2 Insecticidal Proteins in Four Countries of the West African Cotton Belt	y	Benin	Lepidoptera	Noctuidae	Helicoverpa	Helicoverpa armigera	1st, 2nd	neonates	incorporation	7 d		7 (8) each toxin	up to 5	24 each toxin	6912		Benin Sehoue	IC50	EC50	Cry2Ab2	Cry2Ab2	3.23	µg/ml	1000	3230										x	y	N	n	y	y	y	y
1196	Brevault, T,, Prudent, P,, Vaissayre, M,, & Carriere, Y,	2009	Journal of Economic Entomology, 102(6): 2301-2309	Susceptibility of Helicoverpa armigera (Lepidoptera: Noctuidae) to Cry1Ac and Cry2Ab2 Insecticidal Proteins in Four Countries of the West African Cotton Belt	y	Cameroon	Lepidoptera	Noctuidae	Helicoverpa	Helicoverpa armigera	1st, 2nd	neonates	incorporation	7 d		7 (8) each toxin	up to 5	24 each toxin	6912		Cameroon Djalingo	IC50	EC50	Cry2Ab2	Cry2Ab2	2.92	µg/ml	1000	2920										x	y	N	n	y	y	y	y
1196	Brevault, T,, Prudent, P,, Vaissayre, M,, & Carriere, Y,	2009	Journal of Economic Entomology, 102(6): 2301-2309	Susceptibility of Helicoverpa armigera (Lepidoptera: Noctuidae) to Cry1Ac and Cry2Ab2 Insecticidal Proteins in Four Countries of the West African Cotton Belt	y	Cameroon	Lepidoptera	Noctuidae	Helicoverpa	Helicoverpa armigera	1st, 2nd	neonates	incorporation	7 d		7 (8) each toxin	up to 5	24 each toxin	6912		Cameroon Gaschiga	IC50	EC50	Cry2Ab2	Cry2Ab2	2.17	µg/ml	1000	2170										x	y	N	n	y	y	y	y
1196	Brevault, T,, Prudent, P,, Vaissayre, M,, & Carriere, Y,	2009	Journal of Economic Entomology, 102(6): 2301-2309	Susceptibility of Helicoverpa armigera (Lepidoptera: Noctuidae) to Cry1Ac and Cry2Ab2 Insecticidal Proteins in Four Countries of the West African Cotton Belt	y	Cameroon	Lepidoptera	Noctuidae	Helicoverpa	Helicoverpa armigera	1st, 2nd	neonates	incorporation	7 d		7 (8) each toxin	up to 5	24 each toxin	6912		Cameroon Guider	IC50	EC50	Cry2Ab2	Cry2Ab2	0.32	µg/ml	1000	320										x	y	N	n	y	y	y	y
1196	Brevault, T,, Prudent, P,, Vaissayre, M,, & Carriere, Y,	2009	Journal of Economic Entomology, 102(6): 2301-2309	Susceptibility of Helicoverpa armigera (Lepidoptera: Noctuidae) to Cry1Ac and Cry2Ab2 Insecticidal Proteins in Four Countries of the West African Cotton Belt	y	Cameroon	Lepidoptera	Noctuidae	Helicoverpa	Helicoverpa armigera	1st, 2nd	neonates	incorporation	7 d		7 (8) each toxin	up to 5	24 each toxin	6912		Cameroon Mokong	IC50	EC50	Cry2Ab2	Cry2Ab2	1.18	µg/ml	1000	1180										x	y	N	n	y	y	y	y
1196	Brevault, T,, Prudent, P,, Vaissayre, M,, & Carriere, Y,	2009	Journal of Economic Entomology, 102(6): 2301-2309	Susceptibility of Helicoverpa armigera (Lepidoptera: Noctuidae) to Cry1Ac and Cry2Ab2 Insecticidal Proteins in Four Countries of the West African Cotton Belt	y	Cameroon	Lepidoptera	Noctuidae	Helicoverpa	Helicoverpa armigera	1st, 2nd	neonates	incorporation	7 d		7 (8) each toxin	up to 5	24 each toxin	6912		Cameroon Tchatibali	IC50	EC50	Cry2Ab2	Cry2Ab2	0.91	µg/ml	1000	910										x	y	N	n	y	y	y	y
1196	Brevault, T,, Prudent, P,, Vaissayre, M,, & Carriere, Y,	2009	Journal of Economic Entomology, 102(6): 2301-2309	Susceptibility of Helicoverpa armigera (Lepidoptera: Noctuidae) to Cry1Ac and Cry2Ab2 Insecticidal Proteins in Four Countries of the West African Cotton Belt	y	Cameroon	Lepidoptera	Noctuidae	Helicoverpa	Helicoverpa armigera	1st, 2nd	neonates	incorporation	7 d		7 (8) each toxin	up to 5	24 each toxin	6912		Cameroon Tchollire	IC50	EC50	Cry2Ab2	Cry2Ab2	2.99	µg/ml	1000	2990										x	y	N	n	y	y	y	y
1196	Brevault, T,, Prudent, P,, Vaissayre, M,, & Carriere, Y,	2009	Journal of Economic Entomology, 102(6): 2301-2309	Susceptibility of Helicoverpa armigera (Lepidoptera: Noctuidae) to Cry1Ac and Cry2Ab2 Insecticidal Proteins in Four Countries of the West African Cotton Belt	y	Cameroon	Lepidoptera	Noctuidae	Helicoverpa	Helicoverpa armigera	1st, 2nd	neonates	incorporation	7 d		7 (8) each toxin	up to 5	24 each toxin	6912		Cameroon Mokong	IC50	EC50	Cry2Ab2	Cry2Ab2	5.26	µg/ml	1000	5260										x	y	N	n	y	y	y	y
1196	Brevault, T,, Prudent, P,, Vaissayre, M,, & Carriere, Y,	2009	Journal of Economic Entomology, 102(6): 2301-2309	Susceptibility of Helicoverpa armigera (Lepidoptera: Noctuidae) to Cry1Ac and Cry2Ab2 Insecticidal Proteins in Four Countries of the West African Cotton Belt	y	Cameroon	Lepidoptera	Noctuidae	Helicoverpa	Helicoverpa armigera	1st, 2nd	neonates	incorporation	7 d		7 (8) each toxin	up to 5	24 each toxin	6912		Cameroon Tchollire	IC50	EC50	Cry2Ab2	Cry2Ab2	0.29	µg/ml	1000	290										x	y	N	n	y	y	y	y
1196	Brevault, T,, Prudent, P,, Vaissayre, M,, & Carriere, Y,	2009	Journal of Economic Entomology, 102(6): 2301-2309	Susceptibility of Helicoverpa armigera (Lepidoptera: Noctuidae) to Cry1Ac and Cry2Ab2 Insecticidal Proteins in Four Countries of the West African Cotton Belt	y	Cameroon	Lepidoptera	Noctuidae	Helicoverpa	Helicoverpa armigera	1st, 2nd	neonates	incorporation	7 d		7 (8) each toxin	up to 5	24 each toxin	6912		Cameroon Gaschiga	IC50	EC50	Cry2Ab2	Cry2Ab2	0.22	µg/ml	1000	220										x	y	N	n	y	y	y	y
1196	Brevault, T,, Prudent, P,, Vaissayre, M,, & Carriere, Y,	2009	Journal of Economic Entomology, 102(6): 2301-2309	Susceptibility of Helicoverpa armigera (Lepidoptera: Noctuidae) to Cry1Ac and Cry2Ab2 Insecticidal Proteins in Four Countries of the West African Cotton Belt	y	Chad	Lepidoptera	Noctuidae	Helicoverpa	Helicoverpa armigera	1st, 2nd	neonates	incorporation	7 d		7 (8) each toxin	up to 5	24 each toxin	6912		Chad Doba	IC50	EC50	Cry2Ab2	Cry2Ab2	0.74	µg/ml	1000	740										x	y	N	n	y	y	y	y
1196	Brevault, T,, Prudent, P,, Vaissayre, M,, & Carriere, Y,	2009	Journal of Economic Entomology, 102(6): 2301-2309	Susceptibility of Helicoverpa armigera (Lepidoptera: Noctuidae) to Cry1Ac and Cry2Ab2 Insecticidal Proteins in Four Countries of the West African Cotton Belt	y	Chad	Lepidoptera	Noctuidae	Helicoverpa	Helicoverpa armigera	1st, 2nd	neonates	incorporation	7 d		7 (8) each toxin	up to 5	24 each toxin	6912		Chad Sorga	IC50	EC50	Cry2Ab2	Cry2Ab2	3.68	µg/ml	1000	3680										x	y	N	n	y	y	y	y
1196	Brevault, T,, Prudent, P,, Vaissayre, M,, & Carriere, Y,	2009	Journal of Economic Entomology, 102(6): 2301-2309	Susceptibility of Helicoverpa armigera (Lepidoptera: Noctuidae) to Cry1Ac and Cry2Ab2 Insecticidal Proteins in Four Countries of the West African Cotton Belt	y	Benin	Lepidoptera	Noctuidae	Helicoverpa	Helicoverpa armigera	1st, 2nd	neonates	incorporation	7 d		7 (8) each toxin	up to 5	24 each toxin	7870	probit analysis	Benin Gomparou	EC50	EC50	Cry1Ac, MVPII protoxin	Cry1Ac	0.01	µg/ml	1000	10										x	y	N	n	y	y	y	y
1196	Brevault, T,, Prudent, P,, Vaissayre, M,, & Carriere, Y,	2009	Journal of Economic Entomology, 102(6): 2301-2309	Susceptibility of Helicoverpa armigera (Lepidoptera: Noctuidae) to Cry1Ac and Cry2Ab2 Insecticidal Proteins in Four Countries of the West African Cotton Belt	y	Benin	Lepidoptera	Noctuidae	Helicoverpa	Helicoverpa armigera	1st, 2nd	neonates	incorporation	7 d		7 (8) each toxin	up to 5	24 each toxin	7870		Benin Attogon	EC50	EC50	Cry1Ac, MVPII protoxin	Cry1Ac	0.02	µg/ml	1000	20										x	y	N	n	y	y	y	y
1196	Brevault, T,, Prudent, P,, Vaissayre, M,, & Carriere, Y,	2009	Journal of Economic Entomology, 102(6): 2301-2309	Susceptibility of Helicoverpa armigera (Lepidoptera: Noctuidae) to Cry1Ac and Cry2Ab2 Insecticidal Proteins in Four Countries of the West African Cotton Belt	y	Benin	Lepidoptera	Noctuidae	Helicoverpa	Helicoverpa armigera	1st, 2nd	neonates	incorporation	7 d		7 (8) each toxin	up to 5	24 each toxin	7870		Benin Sehoue	EC50	EC50	Cry1Ac, MVPII protoxin	Cry1Ac	0.01	µg/ml	1000	10										x	y	N	n	y	y	y	y
1196	Brevault, T,, Prudent, P,, Vaissayre, M,, & Carriere, Y,	2009	Journal of Economic Entomology, 102(6): 2301-2309	Susceptibility of Helicoverpa armigera (Lepidoptera: Noctuidae) to Cry1Ac and Cry2Ab2 Insecticidal Proteins in Four Countries of the West African Cotton Belt	y	Cameroon	Lepidoptera	Noctuidae	Helicoverpa	Helicoverpa armigera	1st, 2nd	neonates	incorporation	7 d		7 (8) each toxin	up to 5	24 each toxin	7870		Cameroon Djalingo	EC50	EC50	Cry1Ac, MVPII protoxin	Cry1Ac	0.37	µg/ml	1000	370										x	y	N	n	y	y	y	y
1196	Brevault, T,, Prudent, P,, Vaissayre, M,, & Carriere, Y,	2009	Journal of Economic Entomology, 102(6): 2301-2309	Susceptibility of Helicoverpa armigera (Lepidoptera: Noctuidae) to Cry1Ac and Cry2Ab2 Insecticidal Proteins in Four Countries of the West African Cotton Belt	y	Cameroon	Lepidoptera	Noctuidae	Helicoverpa	Helicoverpa armigera	1st, 2nd	neonates	incorporation	7 d		7 (8) each toxin	up to 5	24 each toxin	7870		Cameroon Gaschiga	EC50	EC50	Cry1Ac, MVPII protoxin	Cry1Ac	0.19	µg/ml	1000	190										x	y	N	n	y	y	y	y
1196	Brevault, T,, Prudent, P,, Vaissayre, M,, & Carriere, Y,	2009	Journal of Economic Entomology, 102(6): 2301-2309	Susceptibility of Helicoverpa armigera (Lepidoptera: Noctuidae) to Cry1Ac and Cry2Ab2 Insecticidal Proteins in Four Countries of the West African Cotton Belt	y	Cameroon	Lepidoptera	Noctuidae	Helicoverpa	Helicoverpa armigera	1st, 2nd	neonates	incorporation	7 d		7 (8) each toxin	up to 5	24 each toxin	7870		Cameroon Guider	EC50	EC50	Cry1Ac, MVPII protoxin	Cry1Ac	0.05	µg/ml	1000	50										x	y	N	n	y	y	y	y
1196	Brevault, T,, Prudent, P,, Vaissayre, M,, & Carriere, Y,	2009	Journal of Economic Entomology, 102(6): 2301-2309	Susceptibility of Helicoverpa armigera (Lepidoptera: Noctuidae) to Cry1Ac and Cry2Ab2 Insecticidal Proteins in Four Countries of the West African Cotton Belt	y	Cameroon	Lepidoptera	Noctuidae	Helicoverpa	Helicoverpa armigera	1st, 2nd	neonates	incorporation	7 d		7 (8) each toxin	up to 5	24 each toxin	7870		Cameroon Mokong	EC50	EC50	Cry1Ac, MVPII protoxin	Cry1Ac	0.09	µg/ml	1000	90										x	y	N	n	y	y	y	y
1196	Brevault, T,, Prudent, P,, Vaissayre, M,, & Carriere, Y,	2009	Journal of Economic Entomology, 102(6): 2301-2309	Susceptibility of Helicoverpa armigera (Lepidoptera: Noctuidae) to Cry1Ac and Cry2Ab2 Insecticidal Proteins in Four Countries of the West African Cotton Belt	y	Cameroon	Lepidoptera	Noctuidae	Helicoverpa	Helicoverpa armigera	1st, 2nd	neonates	incorporation	7 d		7 (8) each toxin	up to 5	24 each toxin	7870		Cameroon Tchatibali	EC50	EC50	Cry1Ac, MVPII protoxin	Cry1Ac	0.07	µg/ml	1000	70										x	y	N	n	y	y	y	y
1196	Brevault, T,, Prudent, P,, Vaissayre, M,, & Carriere, Y,	2009	Journal of Economic Entomology, 102(6): 2301-2309	Susceptibility of Helicoverpa armigera (Lepidoptera: Noctuidae) to Cry1Ac and Cry2Ab2 Insecticidal Proteins in Four Countries of the West African Cotton Belt	y	Cameroon	Lepidoptera	Noctuidae	Helicoverpa	Helicoverpa armigera	1st, 2nd	neonates	incorporation	7 d		7 (8) each toxin	up to 5	24 each toxin	7870		Cameroon Tchollire	EC50	EC50	Cry1Ac, MVPII protoxin	Cry1Ac	0.07	µg/ml	1000	70										x	y	N	n	y	y	y	y
1196	Brevault, T,, Prudent, P,, Vaissayre, M,, & Carriere, Y,	2009	Journal of Economic Entomology, 102(6): 2301-2309	Susceptibility of Helicoverpa armigera (Lepidoptera: Noctuidae) to Cry1Ac and Cry2Ab2 Insecticidal Proteins in Four Countries of the West African Cotton Belt	y	Cameroon	Lepidoptera	Noctuidae	Helicoverpa	Helicoverpa armigera	1st, 2nd	neonates	incorporation	7 d		7 (8) each toxin	up to 5	24 each toxin	7870		Cameroon Mokong	EC50	EC50	Cry1Ac, MVPII protoxin	Cry1Ac	0.01	µg/ml	1000	10										x	y	N	n	y	y	y	y
1196	Brevault, T,, Prudent, P,, Vaissayre, M,, & Carriere, Y,	2009	Journal of Economic Entomology, 102(6): 2301-2309	Susceptibility of Helicoverpa armigera (Lepidoptera: Noctuidae) to Cry1Ac and Cry2Ab2 Insecticidal Proteins in Four Countries of the West African Cotton Belt	y	Cameroon	Lepidoptera	Noctuidae	Helicoverpa	Helicoverpa armigera	1st, 2nd	neonates	incorporation	7 d		7 (8) each toxin	up to 5	24 each toxin	7870		Cameroon Tchollire	EC50	EC50	Cry1Ac, MVPII protoxin	Cry1Ac	0.1	µg/ml	1000	100										x	y	N	n	y	y	y	y
1196	Brevault, T,, Prudent, P,, Vaissayre, M,, & Carriere, Y,	2009	Journal of Economic Entomology, 102(6): 2301-2309	Susceptibility of Helicoverpa armigera (Lepidoptera: Noctuidae) to Cry1Ac and Cry2Ab2 Insecticidal Proteins in Four Countries of the West African Cotton Belt	y	Cameroon	Lepidoptera	Noctuidae	Helicoverpa	Helicoverpa armigera	1st, 2nd	neonates	incorporation	7 d		7 (8) each toxin	up to 5	24 each toxin	7870		Cameroon Gaschiga	EC50	EC50	Cry1Ac, MVPII protoxin	Cry1Ac	0.01	µg/ml	1000	10										x	y	N	n	y	y	y	y
1196	Brevault, T,, Prudent, P,, Vaissayre, M,, & Carriere, Y,	2009	Journal of Economic Entomology, 102(6): 2301-2309	Susceptibility of Helicoverpa armigera (Lepidoptera: Noctuidae) to Cry1Ac and Cry2Ab2 Insecticidal Proteins in Four Countries of the West African Cotton Belt	y	Chad	Lepidoptera	Noctuidae	Helicoverpa	Helicoverpa armigera	1st, 2nd	neonates	incorporation	7 d		7 (8) each toxin	up to 5	24 each toxin	7870		Chad Doba	EC50	EC50	Cry1Ac, MVPII protoxin	Cry1Ac	0.08	µg/ml	1000	80										x	y	N	n	y	y	y	y
1196	Brevault, T,, Prudent, P,, Vaissayre, M,, & Carriere, Y,	2009	Journal of Economic Entomology, 102(6): 2301-2309	Susceptibility of Helicoverpa armigera (Lepidoptera: Noctuidae) to Cry1Ac and Cry2Ab2 Insecticidal Proteins in Four Countries of the West African Cotton Belt	y	Chad	Lepidoptera	Noctuidae	Helicoverpa	Helicoverpa armigera	1st, 2nd	neonates	incorporation	7 d		7 (8) each toxin	up to 5	24 each toxin	7870		Chad Sorga	EC50	EC50	Cry1Ac, MVPII protoxin	Cry1Ac	0.14	µg/ml	1000	140										x	y	N	n	y	y	y	y
1196	Brevault, T,, Prudent, P,, Vaissayre, M,, & Carriere, Y,	2009	Journal of Economic Entomology, 102(6): 2301-2309	Susceptibility of Helicoverpa armigera (Lepidoptera: Noctuidae) to Cry1Ac and Cry2Ab2 Insecticidal Proteins in Four Countries of the West African Cotton Belt	y	Nigeria	Lepidoptera	Noctuidae	Helicoverpa	Helicoverpa armigera	1st, 2nd	neonates	incorporation	7 d		7 (8) each toxin	up to 5	24 each toxin	7870		Nigeria Gombe	EC50	EC50	Cry1Ac, MVPII protoxin	Cry1Ac	0.06	µg/ml	1000	60										x	y	N	n	y	y	y	y
1196	Brevault, T,, Prudent, P,, Vaissayre, M,, & Carriere, Y,	2009	Journal of Economic Entomology, 102(6): 2301-2309	Susceptibility of Helicoverpa armigera (Lepidoptera: Noctuidae) to Cry1Ac and Cry2Ab2 Insecticidal Proteins in Four Countries of the West African Cotton Belt	y	Benin	Lepidoptera	Noctuidae	Helicoverpa	Helicoverpa armigera	1st, 2nd	neonates	incorporation	7 d		7 (8) each toxin	up to 5	24 each toxin	6912		Benin Gomparou	EC50	EC50	Cry2Ab2	Cry2Ab2	0.08	µg/ml	1000	80										x	y	N	n	y	y	y	y
1196	Brevault, T,, Prudent, P,, Vaissayre, M,, & Carriere, Y,	2009	Journal of Economic Entomology, 102(6): 2301-2309	Susceptibility of Helicoverpa armigera (Lepidoptera: Noctuidae) to Cry1Ac and Cry2Ab2 Insecticidal Proteins in Four Countries of the West African Cotton Belt	y	Benin	Lepidoptera	Noctuidae	Helicoverpa	Helicoverpa armigera	1st, 2nd	neonates	incorporation	7 d		7 (8) each toxin	up to 5	24 each toxin	6912		Benin Attogon	EC50	EC50	Cry2Ab2	Cry2Ab2	0.15	µg/ml	1000	150										x	y	N	n	y	y	y	y
1196	Brevault, T,, Prudent, P,, Vaissayre, M,, & Carriere, Y,	2009	Journal of Economic Entomology, 102(6): 2301-2309	Susceptibility of Helicoverpa armigera (Lepidoptera: Noctuidae) to Cry1Ac and Cry2Ab2 Insecticidal Proteins in Four Countries of the West African Cotton Belt	y	Benin	Lepidoptera	Noctuidae	Helicoverpa	Helicoverpa armigera	1st, 2nd	neonates	incorporation	7 d		7 (8) each toxin	up to 5	24 each toxin	6912		Benin Sehoue	EC50	EC50	Cry2Ab2	Cry2Ab2	0.05	µg/ml	1000	50										x	y	N	n	y	y	y	y
1196	Brevault, T,, Prudent, P,, Vaissayre, M,, & Carriere, Y,	2009	Journal of Economic Entomology, 102(6): 2301-2309	Susceptibility of Helicoverpa armigera (Lepidoptera: Noctuidae) to Cry1Ac and Cry2Ab2 Insecticidal Proteins in Four Countries of the West African Cotton Belt	y	Cameroon	Lepidoptera	Noctuidae	Helicoverpa	Helicoverpa armigera	1st, 2nd	neonates	incorporation	7 d		7 (8) each toxin	up to 5	24 each toxin	6912		Cameroon Djalingo	EC50	EC50	Cry2Ab2	Cry2Ab2	0.99	µg/ml	1000	990										x	y	N	n	y	y	y	y
1196	Brevault, T,, Prudent, P,, Vaissayre, M,, & Carriere, Y,	2009	Journal of Economic Entomology, 102(6): 2301-2309	Susceptibility of Helicoverpa armigera (Lepidoptera: Noctuidae) to Cry1Ac and Cry2Ab2 Insecticidal Proteins in Four Countries of the West African Cotton Belt	y	Cameroon	Lepidoptera	Noctuidae	Helicoverpa	Helicoverpa armigera	1st, 2nd	neonates	incorporation	7 d		7 (8) each toxin	up to 5	24 each toxin	6912		Cameroon Gaschiga	EC50	EC50	Cry2Ab2	Cry2Ab2	0.22	µg/ml	1000	220										x	y	N	n	y	y	y	y
1196	Brevault, T,, Prudent, P,, Vaissayre, M,, & Carriere, Y,	2009	Journal of Economic Entomology, 102(6): 2301-2309	Susceptibility of Helicoverpa armigera (Lepidoptera: Noctuidae) to Cry1Ac and Cry2Ab2 Insecticidal Proteins in Four Countries of the West African Cotton Belt	y	Cameroon	Lepidoptera	Noctuidae	Helicoverpa	Helicoverpa armigera	1st, 2nd	neonates	incorporation	7 d		7 (8) each toxin	up to 5	24 each toxin	6912		Cameroon Guider	EC50	EC50	Cry2Ab2	Cry2Ab2	0.04	µg/ml	1000	40										x	y	N	n	y	y	y	y
1196	Brevault, T,, Prudent, P,, Vaissayre, M,, & Carriere, Y,	2009	Journal of Economic Entomology, 102(6): 2301-2309	Susceptibility of Helicoverpa armigera (Lepidoptera: Noctuidae) to Cry1Ac and Cry2Ab2 Insecticidal Proteins in Four Countries of the West African Cotton Belt	y	Cameroon	Lepidoptera	Noctuidae	Helicoverpa	Helicoverpa armigera	1st, 2nd	neonates	incorporation	7 d		7 (8) each toxin	up to 5	24 each toxin	6912		Cameroon Mokong	EC50	EC50	Cry2Ab2	Cry2Ab2	0.29	µg/ml	1000	290										x	y	N	n	y	y	y	y
1196	Brevault, T,, Prudent, P,, Vaissayre, M,, & Carriere, Y,	2009	Journal of Economic Entomology, 102(6): 2301-2309	Susceptibility of Helicoverpa armigera (Lepidoptera: Noctuidae) to Cry1Ac and Cry2Ab2 Insecticidal Proteins in Four Countries of the West African Cotton Belt	y	Cameroon	Lepidoptera	Noctuidae	Helicoverpa	Helicoverpa armigera	1st, 2nd	neonates	incorporation	7 d		7 (8) each toxin	up to 5	24 each toxin	6912		Cameroon Tchatibali	EC50	EC50	Cry2Ab2	Cry2Ab2	0.23	µg/ml	1000	230										x	y	N	n	y	y	y	y
1196	Brevault, T,, Prudent, P,, Vaissayre, M,, & Carriere, Y,	2009	Journal of Economic Entomology, 102(6): 2301-2309	Susceptibility of Helicoverpa armigera (Lepidoptera: Noctuidae) to Cry1Ac and Cry2Ab2 Insecticidal Proteins in Four Countries of the West African Cotton Belt	y	Cameroon	Lepidoptera	Noctuidae	Helicoverpa	Helicoverpa armigera	1st, 2nd	neonates	incorporation	7 d		7 (8) each toxin	up to 5	24 each toxin	6912		Cameroon Tchollire	EC50	EC50	Cry2Ab2	Cry2Ab2	0.16	µg/ml	1000	160										x	y	N	n	y	y	y	y
1196	Brevault, T,, Prudent, P,, Vaissayre, M,, & Carriere, Y,	2009	Journal of Economic Entomology, 102(6): 2301-2309	Susceptibility of Helicoverpa armigera (Lepidoptera: Noctuidae) to Cry1Ac and Cry2Ab2 Insecticidal Proteins in Four Countries of the West African Cotton Belt	y	Cameroon	Lepidoptera	Noctuidae	Helicoverpa	Helicoverpa armigera	1st, 2nd	neonates	incorporation	7 d		7 (8) each toxin	up to 5	24 each toxin	6912		Cameroon Mokong	EC50	EC50	Cry2Ab2	Cry2Ab2	0.94	µg/ml	1000	940										x	y	N	n	y	y	y	y
1196	Brevault, T,, Prudent, P,, Vaissayre, M,, & Carriere, Y,	2009	Journal of Economic Entomology, 102(6): 2301-2309	Susceptibility of Helicoverpa armigera (Lepidoptera: Noctuidae) to Cry1Ac and Cry2Ab2 Insecticidal Proteins in Four Countries of the West African Cotton Belt	y	Cameroon	Lepidoptera	Noctuidae	Helicoverpa	Helicoverpa armigera	1st, 2nd	neonates	incorporation	7 d		7 (8) each toxin	up to 5	24 each toxin	6912		Cameroon Tchollire	EC50	EC50	Cry2Ab2	Cry2Ab2	0.11	µg/ml	1000	110										x	y	N	n	y	y	y	y
1196	Brevault, T,, Prudent, P,, Vaissayre, M,, & Carriere, Y,	2009	Journal of Economic Entomology, 102(6): 2301-2309	Susceptibility of Helicoverpa armigera (Lepidoptera: Noctuidae) to Cry1Ac and Cry2Ab2 Insecticidal Proteins in Four Countries of the West African Cotton Belt	y	Cameroon	Lepidoptera	Noctuidae	Helicoverpa	Helicoverpa armigera	1st, 2nd	neonates	incorporation	7 d		7 (8) each toxin	up to 5	24 each toxin	6912		Cameroon Gaschiga	EC50	EC50	Cry2Ab2	Cry2Ab2	0.01	µg/ml	1000	10										x	y	N	n	y	y	y	y
1196	Brevault, T,, Prudent, P,, Vaissayre, M,, & Carriere, Y,	2009	Journal of Economic Entomology, 102(6): 2301-2309	Susceptibility of Helicoverpa armigera (Lepidoptera: Noctuidae) to Cry1Ac and Cry2Ab2 Insecticidal Proteins in Four Countries of the West African Cotton Belt	y	Chad	Lepidoptera	Noctuidae	Helicoverpa	Helicoverpa armigera	1st, 2nd	neonates	incorporation	7 d		7 (8) each toxin	up to 5	24 each toxin	6912		Chad Doba	EC50	EC50	Cry2Ab2	Cry2Ab2	0.23	µg/ml	1000	230										x	y	N	n	y	y	y	y
1196	Brevault, T,, Prudent, P,, Vaissayre, M,, & Carriere, Y,	2009	Journal of Economic Entomology, 102(6): 2301-2309	Susceptibility of Helicoverpa armigera (Lepidoptera: Noctuidae) to Cry1Ac and Cry2Ab2 Insecticidal Proteins in Four Countries of the West African Cotton Belt	y	Chad	Lepidoptera	Noctuidae	Helicoverpa	Helicoverpa armigera	1st, 2nd	neonates	incorporation	7 d		7 (8) each toxin	up to 5	24 each toxin	6912		Chad Sorga	EC50	EC50	Cry2Ab2	Cry2Ab2	0.32	µg/ml	1000	320										x	y	N	n	y	y	y	y
2267	Chandrashekar, K,, Kumari, A,, Kalia, V,, & Gujar, G, T,	2005	Current Science, 88(1): 167-175	Baseline susceptibility of the American bollworm, Helicoverpa armigera (Hubner) to Bacillus thuringiensis Berl var, kurstaki and its endotoxins in India	y	India	Lepidoptera	Noctuidae	Helicoverpa	Helicoverpa armigera	F1	neonates	incorporation	4 d		6	5	10	≥ 350	maximum likelihood programme	Delhi 691	LC50	LC50	Cry1Ab	Cry1Ab	691	µg/l	1	691			482 - 1356				1,6 ± 0,5			x	y	n	y	y	y	y	y
2267	Chandrashekar, K,, Kumari, A,, Kalia, V,, & Gujar, G, T,	2005	Current Science, 88(1): 167-175	Baseline susceptibility of the American bollworm, Helicoverpa armigera (Hubner) to Bacillus thuringiensis Berl var, kurstaki and its endotoxins in India	y	India	Lepidoptera	Noctuidae	Helicoverpa	Helicoverpa armigera	F1	neonates	incorporation	4 d		6	5	10	≥ 350	maximum likelihood programme	Palam	LC50	LC50	Cry1Ab	Cry1Ab	54	µg/l	1	54			38 - 71				2,4 ± 0,4			x	y	n	y	y	y	y	y
2267	Chandrashekar, K,, Kumari, A,, Kalia, V,, & Gujar, G, T,	2005	Current Science, 88(1): 167-175	Baseline susceptibility of the American bollworm, Helicoverpa armigera (Hubner) to Bacillus thuringiensis Berl var, kurstaki and its endotoxins in India	y	India	Lepidoptera	Noctuidae	Helicoverpa	Helicoverpa armigera	F1	neonates	incorporation	4 d		6	5	10	≥ 350	maximum likelihood programme	Amravati	LC50	LC50	Cry1Ab	Cry1Ab	291	µg/l	1	291			198 - 375				2,0 ± 0,4			x	y	n	y	y	y	y	y
2267	Chandrashekar, K,, Kumari, A,, Kalia, V,, & Gujar, G, T,	2005	Current Science, 88(1): 167-175	Baseline susceptibility of the American bollworm, Helicoverpa armigera (Hubner) to Bacillus thuringiensis Berl var, kurstaki and its endotoxins in India	y	India	Lepidoptera	Noctuidae	Helicoverpa	Helicoverpa armigera	F1	neonates	incorporation	4 d		6	5	10	≥ 350	maximum likelihood programme	Akola	LC50	LC50	Cry1Ab	Cry1Ab	431	µg/l	1	431			242 - 4106				0,7 ± 0,2			x	y	n	y	y	y	y	y
2267	Chandrashekar, K,, Kumari, A,, Kalia, V,, & Gujar, G, T,	2005	Current Science, 88(1): 167-175	Baseline susceptibility of the American bollworm, Helicoverpa armigera (Hubner) to Bacillus thuringiensis Berl var, kurstaki and its endotoxins in India	y	India	Lepidoptera	Noctuidae	Helicoverpa	Helicoverpa armigera	F1	neonates	incorporation	4 d		6	5	10	≥ 350	maximum likelihood programme	Delhi	LC50	LC50	Cry1Ac	Cry1Ac	206	µg/l	1	206			51 - 354				1,1 ± 0,4			x	y	n	y	y	y	y	y
2267	Chandrashekar, K,, Kumari, A,, Kalia, V,, & Gujar, G, T,	2005	Current Science, 88(1): 167-175	Baseline susceptibility of the American bollworm, Helicoverpa armigera (Hubner) to Bacillus thuringiensis Berl var, kurstaki and its endotoxins in India	y	India	Lepidoptera	Noctuidae	Helicoverpa	Helicoverpa armigera	F1	neonates	incorporation	4 d		6	5	10	≥ 350	maximum likelihood programme	Palam	LC50	LC50	Cry1Ac	Cry1Ac	23	µg/l	1	23			16132				1,6 ± 0,4			x	y	n	y	y	y	y	y
2267	Chandrashekar, K,, Kumari, A,, Kalia, V,, & Gujar, G, T,	2005	Current Science, 88(1): 167-175	Baseline susceptibility of the American bollworm, Helicoverpa armigera (Hubner) to Bacillus thuringiensis Berl var, kurstaki and its endotoxins in India	y	India	Lepidoptera	Noctuidae	Helicoverpa	Helicoverpa armigera	F1	neonates	incorporation	4 d		6	5	10	≥ 350	maximum likelihood programme	Amravati	LC50	LC50	Cry1Ac	Cry1Ac	263	µg/l	1	263			194 - 338				2,8 ± 0,5			x	y	n	y	y	y	y	y
2267	Chandrashekar, K,, Kumari, A,, Kalia, V,, & Gujar, G, T,	2005	Current Science, 88(1): 167-175	Baseline susceptibility of the American bollworm, Helicoverpa armigera (Hubner) to Bacillus thuringiensis Berl var, kurstaki and its endotoxins in India	y	India	Lepidoptera	Noctuidae	Helicoverpa	Helicoverpa armigera	F1	neonates	incorporation	4 d		6	5	10	≥ 350	maximum likelihood programme	Akola	LC50	LC50	Cry1Ac	Cry1Ac	372	µg/l	1	372			233 - 470				3,0 ± 0,6			x	y	n	y	y	y	y	y
2267	Chandrashekar, K,, Kumari, A,, Kalia, V,, & Gujar, G, T,	2005	Current Science, 88(1): 167-175	Baseline susceptibility of the American bollworm, Helicoverpa armigera (Hubner) to Bacillus thuringiensis Berl var, kurstaki and its endotoxins in India	y	India	Lepidoptera	Noctuidae	Helicoverpa	Helicoverpa armigera	F1	neonates	incorporation	4 d		6	5	10	≥ 350	maximum likelihood programme	Delhi	LC50	LC50	spore-crystal-complex HD-73	Cry1Ac	31	µg/l	1	31			19480				1,3 ± 0,4			x	y	n	y	y	y	y	y
2267	Chandrashekar, K,, Kumari, A,, Kalia, V,, & Gujar, G, T,	2005	Current Science, 88(1): 167-175	Baseline susceptibility of the American bollworm, Helicoverpa armigera (Hubner) to Bacillus thuringiensis Berl var, kurstaki and its endotoxins in India	y	India	Lepidoptera	Noctuidae	Helicoverpa	Helicoverpa armigera	F1	neonates	incorporation	4 d		6	5	10	≥ 350	maximum likelihood programme	Delhi	LC50	LC50	spore-crystal-complex HD-73	Cry1Ac	113	µg/l	1	113			89 - 140				1,8 ± 0,2			x	y	n	y	y	y	y	y
2267	Chandrashekar, K,, Kumari, A,, Kalia, V,, & Gujar, G, T,	2005	Current Science, 88(1): 167-175	Baseline susceptibility of the American bollworm, Helicoverpa armigera (Hubner) to Bacillus thuringiensis Berl var, kurstaki and its endotoxins in India	y	India	Lepidoptera	Noctuidae	Helicoverpa	Helicoverpa armigera	F1	neonates	incorporation	4 d		6	5	10	≥ 350	maximum likelihood programme	Palam	LC50	LC50	spore-crystal-complex HD-73	Cry1Ac	22	µg/l	1	22			15 - 27				2,2 ± 0,4			x	y	n	y	y	y	y	y
2267	Chandrashekar, K,, Kumari, A,, Kalia, V,, & Gujar, G, T,	2005	Current Science, 88(1): 167-175	Baseline susceptibility of the American bollworm, Helicoverpa armigera (Hubner) to Bacillus thuringiensis Berl var, kurstaki and its endotoxins in India	y	India	Lepidoptera	Noctuidae	Helicoverpa	Helicoverpa armigera	F1	neonates	incorporation	4 d		6	5	10	≥ 350	maximum likelihood programme	Delhi	LC50	LC50	spore-crystal-complex HD-73	Cry1Ac	123	µg/l	1	123			90 - 157				1,6 ± 0,2			x	y	n	y	y	y	y	y
2267	Chandrashekar, K,, Kumari, A,, Kalia, V,, & Gujar, G, T,	2005	Current Science, 88(1): 167-175	Baseline susceptibility of the American bollworm, Helicoverpa armigera (Hubner) to Bacillus thuringiensis Berl var, kurstaki and its endotoxins in India	y	India	Lepidoptera	Noctuidae	Helicoverpa	Helicoverpa armigera	F1	neonates	incorporation	4 d		6	5	10	≥ 350	maximum likelihood programme	Guntur	LC50	LC50	spore-crystal-complex HD-73	Cry1Ac	72	µg/l	1	72			46 - 99				1,6 ± 0,3			x	y	n	y	y	y	y	y
2267	Chandrashekar, K,, Kumari, A,, Kalia, V,, & Gujar, G, T,	2005	Current Science, 88(1): 167-175	Baseline susceptibility of the American bollworm, Helicoverpa armigera (Hubner) to Bacillus thuringiensis Berl var, kurstaki and its endotoxins in India	y	India	Lepidoptera	Noctuidae	Helicoverpa	Helicoverpa armigera	F1	neonates	incorporation	4 d		6	5	10	≥ 350	maximum likelihood programme	Bhatinda	LC50	LC50	spore-crystal-complex HD-73	Cry1Ac	43	µg/l	1	43			19 - 68				1,5 ± 0,3			x	y	n	y	y	y	y	y
2267	Chandrashekar, K,, Kumari, A,, Kalia, V,, & Gujar, G, T,	2005	Current Science, 88(1): 167-175	Baseline susceptibility of the American bollworm, Helicoverpa armigera (Hubner) to Bacillus thuringiensis Berl var, kurstaki and its endotoxins in India	y	India	Lepidoptera	Noctuidae	Helicoverpa	Helicoverpa armigera	F1	neonates	incorporation	4 d		6	5	10	≥ 350	maximum likelihood programme	Akola	LC50	LC50	spore-crystal-complex HD-73	Cry1Ac	81	µg/l	1	81			62 - 100				1,7 ± 0,2			x	y	n	y	y	y	y	y
2267	Chandrashekar, K,, Kumari, A,, Kalia, V,, & Gujar, G, T,	2005	Current Science, 88(1): 167-175	Baseline susceptibility of the American bollworm, Helicoverpa armigera (Hubner) to Bacillus thuringiensis Berl var, kurstaki and its endotoxins in India	y	India	Lepidoptera	Noctuidae	Helicoverpa	Helicoverpa armigera	F1	neonates	incorporation	4 d		6	5	10	≥ 350	maximum likelihood programme	Muktsar	LC50	LC50	spore-crystal-complex HD-73	Cry1Ac	50	µg/l	1	50			39 - 60				3,3 ± 0,4			x	y	n	y	y	y	y	y
2267	Chandrashekar, K,, Kumari, A,, Kalia, V,, & Gujar, G, T,	2005	Current Science, 88(1): 167-175	Baseline susceptibility of the American bollworm, Helicoverpa armigera (Hubner) to Bacillus thuringiensis Berl var, kurstaki and its endotoxins in India	y	India	Lepidoptera	Noctuidae	Helicoverpa	Helicoverpa armigera	F1	neonates	incorporation	4 d		6	5	10	≥ 350	maximum likelihood programme	Navsari -I	LC50	LC50	spore-crystal-complex HD-73	Cry1Ac	40	µg/l	1	40			29 - 49				2,9 ± 0,4			x	y	n	y	y	y	y	y
2267	Chandrashekar, K,, Kumari, A,, Kalia, V,, & Gujar, G, T,	2005	Current Science, 88(1): 167-175	Baseline susceptibility of the American bollworm, Helicoverpa armigera (Hubner) to Bacillus thuringiensis Berl var, kurstaki and its endotoxins in India	y	India	Lepidoptera	Noctuidae	Helicoverpa	Helicoverpa armigera	F1	neonates	incorporation	4 d		6	5	10	≥ 350	maximum likelihood programme	Amravati	LC50	LC50	spore-crystal-complex HD-73	Cry1Ac	63	µg/l	1	63			53 - 72				3,5 ± 0,4			x	y	n	y	y	y	y	y
2267	Chandrashekar, K,, Kumari, A,, Kalia, V,, & Gujar, G, T,	2005	Current Science, 88(1): 167-175	Baseline susceptibility of the American bollworm, Helicoverpa armigera (Hubner) to Bacillus thuringiensis Berl var, kurstaki and its endotoxins in India	y	India	Lepidoptera	Noctuidae	Helicoverpa	Helicoverpa armigera	F1	neonates	incorporation	4 d		6	5	10	≥ 350	maximum likelihood programme	Mansa	LC50	LC50	spore-crystal-complex HD-73	Cry1Ac	69	µg/l	1	69			45 - 93				1,7 ± 0,3			x	y	n	y	y	y	y	y
2267	Chandrashekar, K,, Kumari, A,, Kalia, V,, & Gujar, G, T,	2005	Current Science, 88(1): 167-175	Baseline susceptibility of the American bollworm, Helicoverpa armigera (Hubner) to Bacillus thuringiensis Berl var, kurstaki and its endotoxins in India	y	India	Lepidoptera	Noctuidae	Helicoverpa	Helicoverpa armigera	F1	neonates	incorporation	4 d		6	5	10	≥ 350	maximum likelihood programme	Bharuch	LC50	LC50	spore-crystal-complex HD-73	Cry1Ac	91	µg/l	1	91			73 - 112				2,6 ± 0,4			x	y	n	y	y	y	y	y
2267	Chandrashekar, K,, Kumari, A,, Kalia, V,, & Gujar, G, T,	2005	Current Science, 88(1): 167-175	Baseline susceptibility of the American bollworm, Helicoverpa armigera (Hubner) to Bacillus thuringiensis Berl var, kurstaki and its endotoxins in India	y	India	Lepidoptera	Noctuidae	Helicoverpa	Helicoverpa armigera	F1	neonates	incorporation	4 d		6	5	10	≥ 350	maximum likelihood programme	Delhi	LC50	LC50	spore-crystal-complex HD-1	Cry1Ac	54	µg/l	1	54			37 - 74				1,6 ± 0,2			x	y	n	y	y	y	y	y
2267	Chandrashekar, K,, Kumari, A,, Kalia, V,, & Gujar, G, T,	2005	Current Science, 88(1): 167-175	Baseline susceptibility of the American bollworm, Helicoverpa armigera (Hubner) to Bacillus thuringiensis Berl var, kurstaki and its endotoxins in India	y	India	Lepidoptera	Noctuidae	Helicoverpa	Helicoverpa armigera	F1	neonates	incorporation	4 d		6	5	10	≥ 350	maximum likelihood programme	Guntur	LC50	LC50	spore-crystal-complex HD-1	Cry1Ac	175	µg/l	1	175			115 - 250				1,5 ± 0,3			x	y	n	y	y	y	y	y
2267	Chandrashekar, K,, Kumari, A,, Kalia, V,, & Gujar, G, T,	2005	Current Science, 88(1): 167-175	Baseline susceptibility of the American bollworm, Helicoverpa armigera (Hubner) to Bacillus thuringiensis Berl var, kurstaki and its endotoxins in India	y	India	Lepidoptera	Noctuidae	Helicoverpa	Helicoverpa armigera	F1	neonates	incorporation	4 d		6	5	10	≥ 350	maximum likelihood programme	Delhi	LC50	LC50	spore-crystal-complex HD-1	Cry1Ac	35	µg/l	1	35			22 - 50				1,5 ± 0,2			x	y	n	y	y	y	y	y
2267	Chandrashekar, K,, Kumari, A,, Kalia, V,, & Gujar, G, T,	2005	Current Science, 88(1): 167-175	Baseline susceptibility of the American bollworm, Helicoverpa armigera (Hubner) to Bacillus thuringiensis Berl var, kurstaki and its endotoxins in India	y	India	Lepidoptera	Noctuidae	Helicoverpa	Helicoverpa armigera	F1	neonates	incorporation	4 d		6	5	10	≥ 350	maximum likelihood programme	Akola	LC50	LC50	spore-crystal-complex HD-1	Cry1Ac	253	µg/l	1	253			149 - 574				0,8 ± 0,3			x	y	n	y	y	y	y	y
2267	Chandrashekar, K,, Kumari, A,, Kalia, V,, & Gujar, G, T,	2005	Current Science, 88(1): 167-175	Baseline susceptibility of the American bollworm, Helicoverpa armigera (Hubner) to Bacillus thuringiensis Berl var, kurstaki and its endotoxins in India	y	India	Lepidoptera	Noctuidae	Helicoverpa	Helicoverpa armigera	F1	neonates	incorporation	4 d		6	5	10	≥ 350	maximum likelihood programme	Amravati	LC50	LC50	spore-crystal-complex HD-1	Cry1Ac	494	µg/l	1	494			304 - 804				1,2 ± 0,3			x	y	n	y	y	y	y	y
2267	Chandrashekar, K,, Kumari, A,, Kalia, V,, & Gujar, G, T,	2005	Current Science, 88(1): 167-175	Baseline susceptibility of the American bollworm, Helicoverpa armigera (Hubner) to Bacillus thuringiensis Berl var, kurstaki and its endotoxins in India	y	India	Lepidoptera	Noctuidae	Helicoverpa	Helicoverpa armigera	F1	neonates	incorporation	4 d		6	5	10	≥ 350	maximum likelihood programme	Palam	LC50	LC50	spore-crystal-complex HD-1	Cry1Ac	105	µg/l	1	105			75 - 148				1,1 ± 0,2			x	y	n	y	y	y	y	y
7791	Fakrudin, B,, Badariprasad, Krishnareddy, K, B,, Prakash, S, H,, Patil, B, V,, & Kuruvinashetti, M, S,	2003	Resistant Pest Management Newsletter, 12(2): 10-13	Baseline resistance to Cry1Ac toxin in cotton bollworm, Helicoverpa armigera (Hubner) in South Indian cotton ecosystem	y	India	Lepidoptera	Noctuidae	Helicoverpa	Helicoverpa armigera	F1	6d-old larvae	leaf surface	6 d		different	3		90 per dose	probit analysis	ICRISAT	LC50	LC50	Cry1Ac	Cry1Ac	0.13	µg/ml	1000	130			0,080 - 0,180				42005			x	y	n	y	y	y	n	y
7791	Fakrudin, B,, Badariprasad, Krishnareddy, K, B,, Prakash, S, H,, Patil, B, V,, & Kuruvinashetti, M, S,	2003	Resistant Pest Management Newsletter, 12(2): 10-13	Baseline resistance to Cry1Ac toxin in cotton bollworm, Helicoverpa armigera (Hubner) in South Indian cotton ecosystem	y	India	Lepidoptera	Noctuidae	Helicoverpa	Helicoverpa armigera	F1	6d-old larvae	leaf surface	6 d		different	3		90 per dose	probit analysis	Nagpur	LC50	LC50	Cry1Ac	Cry1Ac	0.927	µg/ml	1000	927			0,688 - 1,087				15797			x	y	n	y	y	y	n	y
7791	Fakrudin, B,, Badariprasad, Krishnareddy, K, B,, Prakash, S, H,, Patil, B, V,, & Kuruvinashetti, M, S,	2003	Resistant Pest Management Newsletter, 12(2): 10-13	Baseline resistance to Cry1Ac toxin in cotton bollworm, Helicoverpa armigera (Hubner) in South Indian cotton ecosystem	y	India	Lepidoptera	Noctuidae	Helicoverpa	Helicoverpa armigera	F1	6d-old larvae	leaf surface	6 d		different	3		90 per dose	probit analysis	Nanded	LC50	LC50	Cry1Ac	Cry1Ac	1.095	µg/ml	1000	1095			1,032 - 1,479				41365			x	y	n	y	y	y	n	y
7791	Fakrudin, B,, Badariprasad, Krishnareddy, K, B,, Prakash, S, H,, Patil, B, V,, & Kuruvinashetti, M, S,	2003	Resistant Pest Management Newsletter, 12(2): 10-13	Baseline resistance to Cry1Ac toxin in cotton bollworm, Helicoverpa armigera (Hubner) in South Indian cotton ecosystem	y	India	Lepidoptera	Noctuidae	Helicoverpa	Helicoverpa armigera	F1	6d-old larvae	leaf surface	6 d		different	3		90 per dose	probit analysis	Guntur	LC50	LC50	Cry1Ac	Cry1Ac	1.044	µg/ml	1000	1044			0,980 - 1,154				24685			x	y	n	y	y	y	n	y
7791	Fakrudin, B,, Badariprasad, Krishnareddy, K, B,, Prakash, S, H,, Patil, B, V,, & Kuruvinashetti, M, S,	2003	Resistant Pest Management Newsletter, 12(2): 10-13	Baseline resistance to Cry1Ac toxin in cotton bollworm, Helicoverpa armigera (Hubner) in South Indian cotton ecosystem	y	India	Lepidoptera	Noctuidae	Helicoverpa	Helicoverpa armigera	F1	6d-old larvae	leaf surface	6 d		different	3		90 per dose	probit analysis	Nalgonda	LC50	LC50	Cry1Ac	Cry1Ac	1.001	µg/ml	1000	1001			0,909 - 1,204				36251			x	y	n	y	y	y	n	y
7791	Fakrudin, B,, Badariprasad, Krishnareddy, K, B,, Prakash, S, H,, Patil, B, V,, & Kuruvinashetti, M, S,	2003	Resistant Pest Management Newsletter, 12(2): 10-13	Baseline resistance to Cry1Ac toxin in cotton bollworm, Helicoverpa armigera (Hubner) in South Indian cotton ecosystem	y	India	Lepidoptera	Noctuidae	Helicoverpa	Helicoverpa armigera	F1	6d-old larvae	leaf surface	6 d		different	3		90 per dose	probit analysis	Madhira	LC50	LC50	Cry1Ac	Cry1Ac	0.927	µg/ml	1000	927			0,688 - 1,087				15797			x	y	n	y	y	y	n	y
7791	Fakrudin, B,, Badariprasad, Krishnareddy, K, B,, Prakash, S, H,, Patil, B, V,, & Kuruvinashetti, M, S,	2003	Resistant Pest Management Newsletter, 12(2): 10-13	Baseline resistance to Cry1Ac toxin in cotton bollworm, Helicoverpa armigera (Hubner) in South Indian cotton ecosystem	y	India	Lepidoptera	Noctuidae	Helicoverpa	Helicoverpa armigera	F1	6d-old larvae	leaf surface	6 d		different	3		90 per dose	probit analysis	Raichur	LC50	LC50	Cry1Ac	Cry1Ac	0.884	µg/ml	1000	884			0,647 - 0,975				20911			x	y	n	y	y	y	n	y
7791	Fakrudin, B,, Badariprasad, Krishnareddy, K, B,, Prakash, S, H,, Patil, B, V,, & Kuruvinashetti, M, S,	2003	Resistant Pest Management Newsletter, 12(2): 10-13	Baseline resistance to Cry1Ac toxin in cotton bollworm, Helicoverpa armigera (Hubner) in South Indian cotton ecosystem	y	India	Lepidoptera	Noctuidae	Helicoverpa	Helicoverpa armigera	F1	6d-old larvae	leaf surface	6 d		different	3		90 per dose	probit analysis	Dharwad	LC50	LC50	Cry1Ac	Cry1Ac	0.191	µg/ml	1000	191			0,094 - 0,277				42186			x	y	n	y	y	y	n	y
7791	Fakrudin, B,, Badariprasad, Krishnareddy, K, B,, Prakash, S, H,, Patil, B, V,, & Kuruvinashetti, M, S,	2003	Resistant Pest Management Newsletter, 12(2): 10-13	Baseline resistance to Cry1Ac toxin in cotton bollworm, Helicoverpa armigera (Hubner) in South Indian cotton ecosystem	y	India	Lepidoptera	Noctuidae	Helicoverpa	Helicoverpa armigera	F1	6d-old larvae	leaf surface	6 d		different	3		90 per dose	probit analysis	Mysore	LC50	LC50	Cry1Ac	Cry1Ac	0.26	µg/ml	1000	260			0,121 - 0,408				0.87			x	y	n	y	y	y	n	y
7791	Fakrudin, B,, Badariprasad, Krishnareddy, K, B,, Prakash, S, H,, Patil, B, V,, & Kuruvinashetti, M, S,	2003	Resistant Pest Management Newsletter, 12(2): 10-13	Baseline resistance to Cry1Ac toxin in cotton bollworm, Helicoverpa armigera (Hubner) in South Indian cotton ecosystem	y	India	Lepidoptera	Noctuidae	Helicoverpa	Helicoverpa armigera	F1	6d-old larvae	leaf surface	6 d		different	3		90 per dose	probit analysis	Coimbatore	LC50	LC50	Cry1Ac	Cry1Ac	0.191	µg/ml	1000	191			0,094 - 0,277				42186			x	y	n	y	y	y	n	y
7791	Fakrudin, B,, Badariprasad, Krishnareddy, K, B,, Prakash, S, H,, Patil, B, V,, & Kuruvinashetti, M, S,	2003	Resistant Pest Management Newsletter, 12(2): 10-13	Baseline resistance to Cry1Ac toxin in cotton bollworm, Helicoverpa armigera (Hubner) in South Indian cotton ecosystem	y	India	Lepidoptera	Noctuidae	Helicoverpa	Helicoverpa armigera	F1	6d-old larvae	leaf surface	6 d		different	3		90 per dose	probit analysis	Madurai	LC50	LC50	Cry1Ac	Cry1Ac	0.177	µg/ml	1000	177			0,061 - 0,302				0.77			x	y	n	y	y	y	n	y
7791	Fakrudin, B,, Badariprasad, Krishnareddy, K, B,, Prakash, S, H,, Patil, B, V,, & Kuruvinashetti, M, S,	2003	Resistant Pest Management Newsletter, 12(2): 10-13	Baseline resistance to Cry1Ac toxin in cotton bollworm, Helicoverpa armigera (Hubner) in South Indian cotton ecosystem	y	India	Lepidoptera	Noctuidae	Helicoverpa	Helicoverpa armigera	F1	6d-old larvae	leaf surface	6 d		different	3		90 per dose	probit analysis	Kovilpatti	LC50	LC50	Cry1Ac	Cry1Ac	0.147	µg/ml	1000	147			0,057 - 0,306				0.54			x	y	n	y	y	y	n	y
7801	Farinos, G, P,, Poza, M, d, l,, Gonzalez-Núñez, M,, Hernandez-Crespo, P,, Ortego, F,, & Castanera, P,	2004	Bulletin OILB/SROP, 27(3): 73-77	Research programme to monitor corn borer resistance to Bt-maize in Spain	n	Spain	Lepidoptera	Noctuidae	Sesamia	Sesamia nonagrioides	F1	neonates	surface	7 d		9		48	432		1998 Madrid	LC50	LC50	Cry1Ab batch 1	Cry1Ab	23	ng/cm2	1	23			16-30							x	y	n	n	y	n	y	y
7801	Farinos, G, P,, Poza, M, d, l,, Gonzalez-Núñez, M,, Hernandez-Crespo, P,, Ortego, F,, & Castanera, P,	2004	Bulletin OILB/SROP, 27(3): 73-77	Research programme to monitor corn borer resistance to Bt-maize in Spain	n	Spain	Lepidoptera	Noctuidae	Sesamia	Sesamia nonagrioides	F1	neonates	surface	7 d		9		48	432		1998 Andalucia	LC50	LC50	Cry1Ab batch 1	Cry1Ab	27	ng/cm2	1	27			16-39							x	y	n	n	y	n	y	y
7801	Farinos, G, P,, Poza, M, d, l,, Gonzalez-Núñez, M,, Hernandez-Crespo, P,, Ortego, F,, & Castanera, P,	2004	Bulletin OILB/SROP, 27(3): 73-77	Research programme to monitor corn borer resistance to Bt-maize in Spain	n	Spain	Lepidoptera	Noctuidae	Sesamia	Sesamia nonagrioides	F1	neonates	surface	7 d		9		48	432		1998 Galicia	LC50	LC50	Cry1Ab batch 1	Cry1Ab	55	ng/cm2	1	55			19-115							x	y	n	n	y	n	y	y
7801	Farinos, G, P,, Poza, M, d, l,, Gonzalez-Núñez, M,, Hernandez-Crespo, P,, Ortego, F,, & Castanera, P,	2004	Bulletin OILB/SROP, 27(3): 73-77	Research programme to monitor corn borer resistance to Bt-maize in Spain	n	Spain	Lepidoptera	Noctuidae	Sesamia	Sesamia nonagrioides	F1	neonates	surface	7 d		9		48	432		1998 Ebro	LC50	LC50	Cry1Ab batch 1	Cry1Ab	70	ng/cm2	1	70			56-87							x	y	n	n	y	n	y	y
7801	Farinos, G, P,, Poza, M, d, l,, Gonzalez-Núñez, M,, Hernandez-Crespo, P,, Ortego, F,, & Castanera, P,	2004	Bulletin OILB/SROP, 27(3): 73-77	Research programme to monitor corn borer resistance to Bt-maize in Spain	n	Spain	Lepidoptera	Noctuidae	Sesamia	Sesamia nonagrioides	F1	neonates	surface	7 d		9		48	432		1999 Madrid	LC50	LC50	Cry1Ab batch 1	Cry1Ab	32	ng/cm2	1	32			19-45							x	y	n	n	y	n	y	y
7801	Farinos, G, P,, Poza, M, d, l,, Gonzalez-Núñez, M,, Hernandez-Crespo, P,, Ortego, F,, & Castanera, P,	2004	Bulletin OILB/SROP, 27(3): 73-77	Research programme to monitor corn borer resistance to Bt-maize in Spain	n	Spain	Lepidoptera	Noctuidae	Sesamia	Sesamia nonagrioides	F1	neonates	surface	7 d		9		48	432		1999 Andalucia	LC50	LC50	Cry1Ab batch 1	Cry1Ab	36	ng/cm2	1	36			13-87							x	y	n	n	y	n	y	y
7801	Farinos, G, P,, Poza, M, d, l,, Gonzalez-Núñez, M,, Hernandez-Crespo, P,, Ortego, F,, & Castanera, P,	2004	Bulletin OILB/SROP, 27(3): 73-77	Research programme to monitor corn borer resistance to Bt-maize in Spain	n	Spain	Lepidoptera	Noctuidae	Sesamia	Sesamia nonagrioides	F1	neonates	surface	7 d		9		48	432		1999 Madrid	LC50	LC50	Cry1Ab batch 2	Cry1Ab	5	ng/cm2	1	5			1-9							x	y	n	n	y	n	y	y
7801	Farinos, G, P,, Poza, M, d, l,, Gonzalez-Núñez, M,, Hernandez-Crespo, P,, Ortego, F,, & Castanera, P,	2004	Bulletin OILB/SROP, 27(3): 73-77	Research programme to monitor corn borer resistance to Bt-maize in Spain	n	Spain	Lepidoptera	Noctuidae	Sesamia	Sesamia nonagrioides	F1	neonates	surface	7 d		9		48	432		1999 Andalucia	LC50	LC50	Cry1Ab batch 2	Cry1Ab	3	ng/cm2	1	3			2-4							x	y	n	n	y	n	y	y
7801	Farinos, G, P,, Poza, M, d, l,, Gonzalez-Núñez, M,, Hernandez-Crespo, P,, Ortego, F,, & Castanera, P,	2004	Bulletin OILB/SROP, 27(3): 73-77	Research programme to monitor corn borer resistance to Bt-maize in Spain	n	Spain	Lepidoptera	Noctuidae	Sesamia	Sesamia nonagrioides	F1	neonates	surface	7 d		9		48	432		1999 Ebro	LC50	LC50	Cry1Ab batch 2	Cry1Ab	23	ng/cm2	1	23			14-31							x	y	n	n	y	n	y	y
7801	Farinos, G, P,, Poza, M, d, l,, Gonzalez-Núñez, M,, Hernandez-Crespo, P,, Ortego, F,, & Castanera, P,	2004	Bulletin OILB/SROP, 27(3): 73-77	Research programme to monitor corn borer resistance to Bt-maize in Spain	n	Spain	Lepidoptera	Noctuidae	Sesamia	Sesamia nonagrioides	F1	neonates	surface	7 d		9		48	432		1999 Albacete	LC50	LC50	Cry1Ab batch 2	Cry1Ab	15	ng/cm2	1	15			10-20							x	y	n	n	y	n	y	y
7801	Farinos, G, P,, Poza, M, d, l,, Gonzalez-Núñez, M,, Hernandez-Crespo, P,, Ortego, F,, & Castanera, P,	2004	Bulletin OILB/SROP, 27(3): 73-77	Research programme to monitor corn borer resistance to Bt-maize in Spain	n	Spain	Lepidoptera	Noctuidae	Sesamia	Sesamia nonagrioides	F1	neonates	surface	7 d		9		48	432		2000 Madrid	LC50	LC50	Cry1Ab batch 2	Cry1Ab	10	ng/cm2	1	10			5-15							x	y	n	n	y	n	y	y
7801	Farinos, G, P,, Poza, M, d, l,, Gonzalez-Núñez, M,, Hernandez-Crespo, P,, Ortego, F,, & Castanera, P,	2004	Bulletin OILB/SROP, 27(3): 73-77	Research programme to monitor corn borer resistance to Bt-maize in Spain	n	Spain	Lepidoptera	Noctuidae	Sesamia	Sesamia nonagrioides	F1	neonates	surface	7 d		9		48	432		2000 Ebro	LC50	LC50	Cry1Ab batch 2	Cry1Ab	20	ng/cm2	1	20			15-25							x	y	n	n	y	n	y	y
7801	Farinos, G, P,, Poza, M, d, l,, Gonzalez-Núñez, M,, Hernandez-Crespo, P,, Ortego, F,, & Castanera, P,	2004	Bulletin OILB/SROP, 27(3): 73-77	Research programme to monitor corn borer resistance to Bt-maize in Spain	n	Spain	Lepidoptera	Noctuidae	Sesamia	Sesamia nonagrioides	F1	neonates	surface	7 d		9		48	432		2000 Albacete	LC50	LC50	Cry1Ab batch 2	Cry1Ab	9	ng/cm2	1	9			6-12							x	y	n	n	y	n	y	y
7801	Farinos, G, P,, Poza, M, d, l,, Gonzalez-Núñez, M,, Hernandez-Crespo, P,, Ortego, F,, & Castanera, P,	2004	Bulletin OILB/SROP, 27(3): 73-77	Research programme to monitor corn borer resistance to Bt-maize in Spain	n	Spain	Lepidoptera	Noctuidae	Sesamia	Sesamia nonagrioides	F1	neonates	surface	7 d		9		48	432		2000 Badajoz	LC50	LC50	Cry1Ab batch 2	Cry1Ab	18	ng/cm2	1	18			6-28							x	y	n	n	y	n	y	y
7801	Farinos, G, P,, Poza, M, d, l,, Gonzalez-Núñez, M,, Hernandez-Crespo, P,, Ortego, F,, & Castanera, P,	2004	Bulletin OILB/SROP, 27(3): 73-77	Research programme to monitor corn borer resistance to Bt-maize in Spain	n	Spain	Lepidoptera	Noctuidae	Sesamia	Sesamia nonagrioides	F1	neonates	surface	7 d		9		48	432		2001 Madrid	LC50	LC50	Cry1Ab batch 2	Cry1Ab	19	ng/cm2	1	19			13-26							x	y	n	n	y	n	y	y
7801	Farinos, G, P,, Poza, M, d, l,, Gonzalez-Núñez, M,, Hernandez-Crespo, P,, Ortego, F,, & Castanera, P,	2004	Bulletin OILB/SROP, 27(3): 73-77	Research programme to monitor corn borer resistance to Bt-maize in Spain	n	Spain	Lepidoptera	Noctuidae	Sesamia	Sesamia nonagrioides	F1	neonates	surface	7 d		9		48	432		2001 Ebro	LC50	LC50	Cry1Ab batch 2	Cry1Ab	34	ng/cm2	1	34			27-42							x	y	n	n	y	n	y	y
7801	Farinos, G, P,, Poza, M, d, l,, Gonzalez-Núñez, M,, Hernandez-Crespo, P,, Ortego, F,, & Castanera, P,	2004	Bulletin OILB/SROP, 27(3): 73-77	Research programme to monitor corn borer resistance to Bt-maize in Spain	n	Spain	Lepidoptera	Noctuidae	Sesamia	Sesamia nonagrioides	F1	neonates	surface	7 d		9		48	432		2002 Madrid	LC50	LC50	Cry1Ab batch 2	Cry1Ab	15	ng/cm2	1	15			9-23							x	y	n	n	y	n	y	y
7801	Farinos, G, P,, Poza, M, d, l,, Gonzalez-Núñez, M,, Hernandez-Crespo, P,, Ortego, F,, & Castanera, P,	2004	Bulletin OILB/SROP, 27(3): 73-77	Research programme to monitor corn borer resistance to Bt-maize in Spain	n	Spain	Lepidoptera	Noctuidae	Sesamia	Sesamia nonagrioides	F1	neonates	surface	7 d		9		48	432		2002 Ebro	LC50	LC50	Cry1Ab batch 2	Cry1Ab	11	ng/cm2	1	11			7-16							x	y	n	n	y	n	y	y
7801	Farinos, G, P,, Poza, M, d, l,, Gonzalez-Núñez, M,, Hernandez-Crespo, P,, Ortego, F,, & Castanera, P,	2004	Bulletin OILB/SROP, 27(3): 73-77	Research programme to monitor corn borer resistance to Bt-maize in Spain	n	Spain	Lepidoptera	Noctuidae	Sesamia	Sesamia nonagrioides	F1	neonates	surface	7 d		9		48	432		2002 Badajoz	LC50	LC50	Cry1Ab batch 2	Cry1Ab	22	ng/cm2	1	22			16-32							x	y	n	n	y	n	y	y
7801	Farinos, G, P,, Poza, M, d, l,, Gonzalez-Núñez, M,, Hernandez-Crespo, P,, Ortego, F,, & Castanera, P,	2004	Bulletin OILB/SROP, 27(3): 73-77	Research programme to monitor corn borer resistance to Bt-maize in Spain	n	Spain	Lepidoptera	Crambidae	Ostrinia	Ostrinia nubilalis	F2	neonates	surface	8 d		9		48	432		1998 Ebro	LC50	LC50	Cry1Ab batch 1	Cry1Ab	109	ng/cm2	1	109			77-162							x	y	n	n	y	n	y	y
7801	Farinos, G, P,, Poza, M, d, l,, Gonzalez-Núñez, M,, Hernandez-Crespo, P,, Ortego, F,, & Castanera, P,	2004	Bulletin OILB/SROP, 27(3): 73-77	Research programme to monitor corn borer resistance to Bt-maize in Spain	n	Spain	Lepidoptera	Crambidae	Ostrinia	Ostrinia nubilalis	F2	neonates	surface	8 d		9		48	432		1998 Madrid	LC50	LC50	Cry1Ab batch 1	Cry1Ab	104	ng/cm2	1	104			82-140							x	y	n	n	y	n	y	y
7801	Farinos, G, P,, Poza, M, d, l,, Gonzalez-Núñez, M,, Hernandez-Crespo, P,, Ortego, F,, & Castanera, P,	2004	Bulletin OILB/SROP, 27(3): 73-77	Research programme to monitor corn borer resistance to Bt-maize in Spain	n	Spain	Lepidoptera	Crambidae	Ostrinia	Ostrinia nubilalis	F2	neonates	surface	8 d		9		48	432		1999 Ebro	LC50	LC50	Cry1Ab batch 1	Cry1Ab	81	ng/cm2	1	81			51-122							x	y	n	n	y	n	y	y
7801	Farinos, G, P,, Poza, M, d, l,, Gonzalez-Núñez, M,, Hernandez-Crespo, P,, Ortego, F,, & Castanera, P,	2004	Bulletin OILB/SROP, 27(3): 73-77	Research programme to monitor corn borer resistance to Bt-maize in Spain	n	Spain	Lepidoptera	Crambidae	Ostrinia	Ostrinia nubilalis	F2	neonates	surface	8 d		9		48	432		1999 Badajoz	LC50	LC50	Cry1Ab batch 2	Cry1Ab	4	ng/cm2	1	4			2-6							x	y	n	n	y	n	y	y
7801	Farinos, G, P,, Poza, M, d, l,, Gonzalez-Núñez, M,, Hernandez-Crespo, P,, Ortego, F,, & Castanera, P,	2004	Bulletin OILB/SROP, 27(3): 73-77	Research programme to monitor corn borer resistance to Bt-maize in Spain	n	Spain	Lepidoptera	Crambidae	Ostrinia	Ostrinia nubilalis	F2	neonates	surface	8 d		9		48	432		2000 Badajoz	LC50	LC50	Cry1Ab batch 2	Cry1Ab	3	ng/cm2	1	3			2-5							x	y	n	n	y	n	y	y
7801	Farinos, G, P,, Poza, M, d, l,, Gonzalez-Núñez, M,, Hernandez-Crespo, P,, Ortego, F,, & Castanera, P,	2004	Bulletin OILB/SROP, 27(3): 73-77	Research programme to monitor corn borer resistance to Bt-maize in Spain	n	Spain	Lepidoptera	Crambidae	Ostrinia	Ostrinia nubilalis	F2	neonates	surface	8 d		9		48	432		2001 Ebro	LC50	LC50	Cry1Ab batch 2	Cry1Ab	34	ng/cm2	1	34			28-41							x	y	n	n	y	n	y	y
7801	Farinos, G, P,, Poza, M, d, l,, Gonzalez-Núñez, M,, Hernandez-Crespo, P,, Ortego, F,, & Castanera, P,	2004	Bulletin OILB/SROP, 27(3): 73-77	Research programme to monitor corn borer resistance to Bt-maize in Spain	n	Spain	Lepidoptera	Crambidae	Ostrinia	Ostrinia nubilalis	F2	neonates	surface	8 d		9		48	432		2002 Ebro	LC50	LC50	Cry1Ab batch 2	Cry1Ab	9	ng/cm2	1	9			6-12							x	y	n	n	y	n	y	y
7801	Farinos, G, P,, Poza, M, d, l,, Gonzalez-Núñez, M,, Hernandez-Crespo, P,, Ortego, F,, & Castanera, P,	2004	Bulletin OILB/SROP, 27(3): 73-77	Research programme to monitor corn borer resistance to Bt-maize in Spain	n	Spain	Lepidoptera	Crambidae	Ostrinia	Ostrinia nubilalis	F2	neonates	surface	8 d		9		48	432		2002 Badajoz	LC50	LC50	Cry1Ab batch 2	Cry1Ab	6	ng/cm2	1	6			5-7							x	y	n	n	y	n	y	y
4268	Farinos, G,, de la Poza, M,, Ortego, F,, & Castanera, P,	2012	Journal of Economic Entomology, 105(1): 214-221	Susceptibility to the Cry1F Toxin of Field Populations of Sesamia nonagrioides (Lepidoptera: Noctuidae) in Mediterranean Maize Cultivation Regions	y	Spain	Lepidoptera	Noctuidae	Sesamia	Sesamia nonagrioides	F1	neonates	surface	7 d	4055	7	3	96	3959	probit analysis	Ebro (SP)	LC50	LC50	Cry1F	Cry1F	11.5	ng/cm2	1	11.5			18,8-44,0		39.3	24,3-126,2	2,40 ± 0,39	24.2	8	x	y	y	n	y	y	y	y
4268	Farinos, G,, de la Poza, M,, Ortego, F,, & Castanera, P,	2012	Journal of Economic Entomology, 105(1): 214-221	Susceptibility to the Cry1F Toxin of Field Populations of Sesamia nonagrioides (Lepidoptera: Noctuidae) in Mediterranean Maize Cultivation Regions	y	Spain	Lepidoptera	Noctuidae	Sesamia	Sesamia nonagrioides	F1	neonates	surface	7 d	4055	7	3	96	3959	probit analysis	Albacete (SP)	LC50	LC50	Cry1F	Cry1F	29.6	ng/cm2	1	29.6			4,5-15,6		157.7	91,8-468,9	1,76 ± 0,20	31.2	12	x	y	y	n	y	y	y	y
4268	Farinos, G,, de la Poza, M,, Ortego, F,, & Castanera, P,	2012	Journal of Economic Entomology, 105(1): 214-221	Susceptibility to the Cry1F Toxin of Field Populations of Sesamia nonagrioides (Lepidoptera: Noctuidae) in Mediterranean Maize Cultivation Regions	y	Spain	Lepidoptera	Noctuidae	Sesamia	Sesamia nonagrioides	F1	neonates	surface	7 d	4055	7	3	96	3959	probit analysis	Badajoz (SP)	LC50	LC50	Cry1F	Cry1F	10	ng/cm2	1	10			11,2-27,0		40.3	25,2-103,7	2,12 ± 0,20	94.9	16	x	y	y	n	y	y	y	y
4268	Farinos, G,, de la Poza, M,, Ortego, F,, & Castanera, P,	2012	Journal of Economic Entomology, 105(1): 214-221	Susceptibility to the Cry1F Toxin of Field Populations of Sesamia nonagrioides (Lepidoptera: Noctuidae) in Mediterranean Maize Cultivation Regions	y	France	Lepidoptera	Noctuidae	Sesamia	Sesamia nonagrioides	F1	neonates	surface	7 d	4055	7	3	96	3959	probit analysis	Toulouse (FR)	LC50	LC50	Cry1F	Cry1F	18.8	ng/cm2	1	18.8			2,6-25,5		81.9	54,6-159,5	2,00 ± 0,22	20.3	10	x	y	y	n	y	y	y	y
4268	Farinos, G,, de la Poza, M,, Ortego, F,, & Castanera, P,	2012	Journal of Economic Entomology, 105(1): 214-221	Susceptibility to the Cry1F Toxin of Field Populations of Sesamia nonagrioides (Lepidoptera: Noctuidae) in Mediterranean Maize Cultivation Regions	y	France	Lepidoptera	Noctuidae	Sesamia	Sesamia nonagrioides	F1	neonates	surface	7 d	4055	7	3	96	3959	probit analysis	Landes (FR)	LC50	LC50	Cry1F	Cry1F	12.8	ng/cm2	1	12.8			9,1-15,9		106.7	48,5-1376,1	1,39 ± 0,17	55.4	10	x	y	y	n	y	y	y	y
4268	Farinos, G,, de la Poza, M,, Ortego, F,, & Castanera, P,	2012	Journal of Economic Entomology, 105(1): 214-221	Susceptibility to the Cry1F Toxin of Field Populations of Sesamia nonagrioides (Lepidoptera: Noctuidae) in Mediterranean Maize Cultivation Regions	y	Italy	Lepidoptera	Noctuidae	Sesamia	Sesamia nonagrioides	F1	neonates	surface	7 d	4055	7	3	96	3959	probit analysis	Sardinia (IT)	LC50	LC50	Cry1F	Cry1F	12.4	ng/cm2	1	12.4			3,4-18,5		68.9	53,2-96,4	1,72 ± 0,17	14	16	x	y	y	n	y	y	y	y
4268	Farinos, G,, de la Poza, M,, Ortego, F,, & Castanera, P,	2012	Journal of Economic Entomology, 105(1): 214-221	Susceptibility to the Cry1F Toxin of Field Populations of Sesamia nonagrioides (Lepidoptera: Noctuidae) in Mediterranean Maize Cultivation Regions	y	Italy	Lepidoptera	Noctuidae	Sesamia	Sesamia nonagrioides	F1	neonates	surface	7 d	4055	7	3	96	3959	probit analysis	Metaponto (IT)	LC50	LC50	Cry1F	Cry1F	10.9	ng/cm2	1	10.9			3,0-18,9		40.7	23,0-302,5	2,24 ± 0,26	65.7	10	x	y	y	n	y	y	y	y
4268	Farinos, G,, de la Poza, M,, Ortego, F,, & Castanera, P,	2012	Journal of Economic Entomology, 105(1): 214-221	Susceptibility to the Cry1F Toxin of Field Populations of Sesamia nonagrioides (Lepidoptera: Noctuidae) in Mediterranean Maize Cultivation Regions	y	Greece	Lepidoptera	Noctuidae	Sesamia	Sesamia nonagrioides	F1	neonates	surface	7 d	4055	7	3	96	3959	probit analysis	Nigrita-Serres (GR)	LC50	LC50	Cry1F	Cry1F	11.2	ng/cm2	1	11.2			21,2-34,4		43.6	24,6-359	2,17 ± 0,28	54.4	10	x	y	y	n	y	y	y	y
4268	Farinos, G,, de la Poza, M,, Ortego, F,, & Castanera, P,	2012	Journal of Economic Entomology, 105(1): 214-221	Susceptibility to the Cry1F Toxin of Field Populations of Sesamia nonagrioides (Lepidoptera: Noctuidae) in Mediterranean Maize Cultivation Regions	y	Turkey	Lepidoptera	Noctuidae	Sesamia	Sesamia nonagrioides	F1	neonates	surface	7 d	4055	7	3	96	3959	probit analysis	Adana (TU)	LC50	LC50	Cry1F	Cry1F	27.4	ng/cm2	1	27.4					114.2	85,1-172,3	2,07 ± 0,17	25.1	16	x	y	y	n	y	y	y	y
	C, Gaspers, B, D, Siegfried2, T, Spencer2, A, P, Alves3, N, P, Storer4, I, Schuphan1 & S, Eber	2011	J, Appl, Entomol, 135: 7–16	Susceptibility of European and North American populations of the European corn borer to the Cry1F insecticidal protein	y	Germany	Lepidoptera	Crambidae	Ostrinia	Ostrinia nubilalis	F2, F3, Spain partly F5 - F11	neonates	surface	7 d		6	4	?	4928	probit analysis	Heilbronn (Germany) F2	LC50	LC50	Cry1F	Cry1F	3.08	ng/cm2	1	3.08			2,57–3,70	LC90 (ng/cm2)	10.82	8,08–14,49	2,35 ± 0,07	1.53	3	x	y	n	n	y	y	y	y
	C, Gaspers, B, D, Siegfried2, T, Spencer2, A, P, Alves3, N, P, Storer4, I, Schuphan1 & S, Eber	2011	J, Appl, Entomol, 135: 7–16	Susceptibility of European and North American populations of the European corn borer to the Cry1F insecticidal protein	y	Germany	Lepidoptera	Crambidae	Ostrinia	Ostrinia nubilalis	F2, F3, Spain partly F5 - F12	neonates	surface	7 d		6	4	?	4929	probit analysis	Upper Rhine Valley (Germany) F3	LC50	LC50	Cry1F	Cry1F	3.18	ng/cm2	1	3.18			2,63–3,84		12.52	9,11–71,21	2,15 ± 0,06	4.26	3		y	n	n	y	y	y	y
	C, Gaspers, B, D, Siegfried2, T, Spencer2, A, P, Alves3, N, P, Storer4, I, Schuphan1 & S, Eber	2011	J, Appl, Entomol, 135: 7–16	Susceptibility of European and North American populations of the European corn borer to the Cry1F insecticidal protein	y	Germany	Lepidoptera	Crambidae	Ostrinia	Ostrinia nubilalis	F2, F3, Spain partly F5 - F13	neonates	surface	7 d		6	4	?	4930	probit analysis	Oderbruch (Germany) F2	LC50	LC50	Cry1F	Cry1F	3.59	ng/cm2	1	3.59			2,86–4,52		16.04	11,64–22,11	1,76 ± 0,05	0.74	4		y	n	n	y	y	y	y
	C, Gaspers, B, D, Siegfried2, T, Spencer2, A, P, Alves3, N, P, Storer4, I, Schuphan1 & S, Eber	2011	J, Appl, Entomol, 135: 7–16	Susceptibility of European and North American populations of the European corn borer to the Cry1F insecticidal protein	y	Spain	Lepidoptera	Crambidae	Ostrinia	Ostrinia nubilalis	F2, F3, Spain partly F5 - F14	neonates	surface	7 d		6	4	?	4931	probit analysis	Badajoz (Spain) F2	LC50	LC50	Cry1F	Cry1F	4.15	ng/cm2	1	4.15			3,60–4,79		10.67	8,52–13,37	3,12 ± 0,10	4.74	3		y	n	n	y	y	y	y
	C, Gaspers, B, D, Siegfried2, T, Spencer2, A, P, Alves3, N, P, Storer4, I, Schuphan1 & S, Eber	2011	J, Appl, Entomol, 135: 7–16	Susceptibility of European and North American populations of the European corn borer to the Cry1F insecticidal protein	y	Spain	Lepidoptera	Crambidae	Ostrinia	Ostrinia nubilalis	F2, F3, Spain partly F5 - F15	neonates	surface	7 d		6	4	?	4932	probit analysis	Ebro (Spain) F3/4	LC50	LC50	Cry1F	Cry1F	3.78	ng/cm2	1	3.78			3,22–4,43		10.42	8,15–13,32	2,91 ± 0,10	2.07	3		y	n	n	y	y	y	y
	C, Gaspers, B, D, Siegfried2, T, Spencer2, A, P, Alves3, N, P, Storer4, I, Schuphan1 & S, Eber	2011	J, Appl, Entomol, 135: 7–16	Susceptibility of European and North American populations of the European corn borer to the Cry1F insecticidal protein	y	Italy	Lepidoptera	Crambidae	Ostrinia	Ostrinia nubilalis	F2, F3, Spain partly F5 - F17	neonates	surface	7 d		6	4	?	4934	probit analysis	Padua (Italy) F2	LC50	LC50	Cry1F	Cry1F	2.72	ng/cm2	1	2.72			2,30–3,20		9.18	7,19–11,73	2,42 ± 0,05	4.22	4		y	n	n	y	y	y	y
	C, Gaspers, B, D, Siegfried2, T, Spencer2, A, P, Alves3, N, P, Storer4, I, Schuphan1 & S, Eber	2011	J, Appl, Entomol, 135: 7–16	Susceptibility of European and North American populations of the European corn borer to the Cry1F insecticidal protein	y	Italy	Lepidoptera	Crambidae	Ostrinia	Ostrinia nubilalis	F2, F3, Spain partly F5 - F18	neonates	surface	7 d		6	4	?	4935	probit analysis	Lacchiarella (Italy) F3	LC50	LC50	Cry1F	Cry1F	5.93	ng/cm2	1	5.93			5,06–6,94		18.41	14,37–23,57	2,60 ± 0,06	5	4		y	n	n	y	y	y	y
	C, Gaspers, B, D, Siegfried2, T, Spencer2, A, P, Alves3, N, P, Storer4, I, Schuphan1 & S, Eber	2011	J, Appl, Entomol, 135: 7–16	Susceptibility of European and North American populations of the European corn borer to the Cry1F insecticidal protein	y	France	Lepidoptera	Crambidae	Ostrinia	Ostrinia nubilalis	F2, F3, Spain partly F5 - F20	neonates	surface	7 d		6	4	?	4937	probit analysis	Grignon (France) F 3	LC50	LC50	Cry1F	Cry1F	4.68	ng/cm2	1	4.68			4,09–5,35		11.64	9,47–14,27	3,23 ± 0,09	0.62	4		y	n	n	y	y	y	y
	C, Gaspers, B, D, Siegfried2, T, Spencer2, A, P, Alves3, N, P, Storer4, I, Schuphan1 & S, Eber	2011	J, Appl, Entomol, 135: 7–16	Susceptibility of European and North American populations of the European corn borer to the Cry1F insecticidal protein	y	France	Lepidoptera	Crambidae	Ostrinia	Ostrinia nubilalis	F2, F3, Spain partly F5 - F21	neonates	surface	7 d		6	4	?	4938	probit analysis	Poitiers (France) F3	LC50	LC50	Cry1F	Cry1F	6.11	ng/cm2	1	6.11			5,31–7,03		14.99	12,23–18,37	3,29 ± 0,10	4.96	4		y	n	n	y	y	y	y
	C, Gaspers, B, D, Siegfried2, T, Spencer2, A, P, Alves3, N, P, Storer4, I, Schuphan1 & S, Eber	2011	J, Appl, Entomol, 135: 7–16	Susceptibility of European and North American populations of the European corn borer to the Cry1F insecticidal protein	y	USA	Lepidoptera	Crambidae	Ostrinia	Ostrinia nubilalis	F1, partly F1 + F2	neonates	surface	7 d		5	6	?	18975	probit analysis	Nobles Co, MN 2000	LC50	LC50	Cry1F	Cry1F	2.37	ng/cm2	1	2.37			1,51–3,33	LC90 (ng/cm2)	10.37	7,12–18,19	2,00 ± 0,16	10.67	5		y	n	n	y	y	y	y
	C, Gaspers, B, D, Siegfried2, T, Spencer2, A, P, Alves3, N, P, Storer4, I, Schuphan1 & S, Eber	2011	J, Appl, Entomol, 135: 7–16	Susceptibility of European and North American populations of the European corn borer to the Cry1F insecticidal protein	y	USA	Lepidoptera	Crambidae	Ostrinia	Ostrinia nubilalis	F1, partly F1 + F2	neonates	surface	7 d		5	6	?	18975	probit analysis	Saunders Co, 2000 NE	LC50	LC50	Cry1F	Cry1F	3.79	ng/cm2	1	3.79			3,07–4,53		12.51	10,28–16,13	2,47 ± 0,25	2.14	5		y	n	n	y	y	y	y
	C, Gaspers, B, D, Siegfried2, T, Spencer2, A, P, Alves3, N, P, Storer4, I, Schuphan1 & S, Eber	2011	J, Appl, Entomol, 135: 7–16	Susceptibility of European and North American populations of the European corn borer to the Cry1F insecticidal protein	y	USA	Lepidoptera	Crambidae	Ostrinia	Ostrinia nubilalis	F1, partly F1 + F2	neonates	surface	7 d		5	6	?	18975	probit analysis	Hamilton Co, NE 2000	LC50	LC50	Cry1F	Cry1F	2.88	ng/cm2	1	2.88			1,94–3,84		9.8	7,25–15,20	2,41 ± 0,22	8.07	5		y	n	n	y	y	y	y
	C, Gaspers, B, D, Siegfried2, T, Spencer2, A, P, Alves3, N, P, Storer4, I, Schuphan1 & S, Eber	2011	J, Appl, Entomol, 135: 7–16	Susceptibility of European and North American populations of the European corn borer to the Cry1F insecticidal protein	y	USA	Lepidoptera	Crambidae	Ostrinia	Ostrinia nubilalis	F1, partly F1 + F2	neonates	surface	7 d		5	6	?	18975	probit analysis	Scott Co, KS 2000	LC50	LC50	Cry1F	Cry1F	2.55	ng/cm2	1	2.55			2,22–2,91		8.33	7,00–10,34	2,49 ± 0,18	1.36	5		y	n	n	y	y	y	y
	C, Gaspers, B, D, Siegfried2, T, Spencer2, A, P, Alves3, N, P, Storer4, I, Schuphan1 & S, Eber	2011	J, Appl, Entomol, 135: 7–16	Susceptibility of European and North American populations of the European corn borer to the Cry1F insecticidal protein	y	USA	Lepidoptera	Crambidae	Ostrinia	Ostrinia nubilalis	F1, partly F1 + F2	neonates	surface	7 d		5	6	?	18975	probit analysis	Finney Co, KS #1 2000	LC50	LC50	Cry1F	Cry1F	8.7	ng/cm2	1	8.7			4,20–12,28		23.28	16,11–60,41	3,0 ± 0,16	16.68	5		y	n	n	y	y	y	y
	C, Gaspers, B, D, Siegfried2, T, Spencer2, A, P, Alves3, N, P, Storer4, I, Schuphan1 & S, Eber	2011	J, Appl, Entomol, 135: 7–16	Susceptibility of European and North American populations of the European corn borer to the Cry1F insecticidal protein	y	USA	Lepidoptera	Crambidae	Ostrinia	Ostrinia nubilalis	F1, partly F1 + F2	neonates	surface	7 d		5	6	?	18975	probit analysis	Finney Co, KS #2 2000	LC50	LC50	Cry1F	Cry1F	4.96	ng/cm2	1	4.96			4,25–5,67		12.48	10,66–15,29	3,20 ± 0,31	2.59	5		y	n	n	y	y	y	y
	C, Gaspers, B, D, Siegfried2, T, Spencer2, A, P, Alves3, N, P, Storer4, I, Schuphan1 & S, Eber	2011	J, Appl, Entomol, 135: 7–16	Susceptibility of European and North American populations of the European corn borer to the Cry1F insecticidal protein	y	USA	Lepidoptera	Crambidae	Ostrinia	Ostrinia nubilalis	F1, partly F1 + F2	neonates	surface	7 d		5	6	?	18975	probit analysis	Marion Co, IA 2000	LC50	LC50	Cry1F	Cry1F	2.56	ng/cm2	1	2.56			2,14–3,00		8.1	6,75–10,20	2,12 ± 0,17	1.47	5		y	n	n	y	y	y	y
	C, Gaspers, B, D, Siegfried2, T, Spencer2, A, P, Alves3, N, P, Storer4, I, Schuphan1 & S, Eber	2011	J, Appl, Entomol, 135: 7–16	Susceptibility of European and North American populations of the European corn borer to the Cry1F insecticidal protein	y	USA	Lepidoptera	Crambidae	Ostrinia	Ostrinia nubilalis	F1, partly F1 + F2	neonates	surface	7 d		5	6	?	18975	probit analysis	Story Co, IA 2000	LC50	LC50	Cry1F	Cry1F	3.24	ng/cm2	1	3.24			2,40–3,70		10.05	7,64–15,54	2,80 ± 0,34	7.66	5		y	n	n	y	y	y	y
	C, Gaspers, B, D, Siegfried2, T, Spencer2, A, P, Alves3, N, P, Storer4, I, Schuphan1 & S, Eber	2011	J, Appl, Entomol, 135: 7–16	Susceptibility of European and North American populations of the European corn borer to the Cry1F insecticidal protein	y	USA	Lepidoptera	Crambidae	Ostrinia	Ostrinia nubilalis	F1, partly F1 + F2	neonates	surface	7 d		5	6	?	18975	probit analysis	Polk/Tama Co, IA 2000	LC50	LC50	Cry1F	Cry1F	4.74	ng/cm2	1	4.74			3,30–6,26		16.83	12,21–27,62	2,33 ± 0,20	9.75	5		y	n	n	y	y	y	y
	C, Gaspers, B, D, Siegfried2, T, Spencer2, A, P, Alves3, N, P, Storer4, I, Schuphan1 & S, Eber	2011	J, Appl, Entomol, 135: 7–16	Susceptibility of European and North American populations of the European corn borer to the Cry1F insecticidal protein	y	USA	Lepidoptera	Crambidae	Ostrinia	Ostrinia nubilalis	F1, partly F1 + F2	neonates	surface	7 d		5	6	?	18975	probit analysis	Sioux Co, IA 2000	LC50	LC50	Cry1F	Cry1F	3.17	ng/cm2	1	3.17			2,65–3,71		11.18	9,29–14,03	2,38 ± 0,20	1.53	5		y	n	n	y	y	y	y
	C, Gaspers, B, D, Siegfried2, T, Spencer2, A, P, Alves3, N, P, Storer4, I, Schuphan1 & S, Eber	2011	J, Appl, Entomol, 135: 7–16	Susceptibility of European and North American populations of the European corn borer to the Cry1F insecticidal protein	y	USA	Lepidoptera	Crambidae	Ostrinia	Ostrinia nubilalis	F1, partly F1 + F2	neonates	surface	7 d		5	6	?	18975	probit analysis	Linn Co, IA 2000	LC50	LC50	Cry1F	Cry1F	3.04	ng/cm2	1	3.04			2,40–3,70		8.51	6,80–11,61	2,86 ± 0,26c	5.56	5		y	n	n	y	y	y	y
	C, Gaspers, B, D, Siegfried2, T, Spencer2, A, P, Alves3, N, P, Storer4, I, Schuphan1 & S, Eber	2011	J, Appl, Entomol, 135: 7–16	Susceptibility of European and North American populations of the European corn borer to the Cry1F insecticidal protein	y	USA	Lepidoptera	Crambidae	Ostrinia	Ostrinia nubilalis	F1, partly F1 + F2	neonates	surface	7 d		5	6	?	18975	probit analysis	Warren Co, IL 2000	LC50	LC50	Cry1F	Cry1F	2.32	ng/cm2	1	2.32			1,44–3,33		11.5	7,62–21,92	1,84 ± 0,14	12.12	5		y	n	n	y	y	y	y
	C, Gaspers, B, D, Siegfried2, T, Spencer2, A, P, Alves3, N, P, Storer4, I, Schuphan1 & S, Eber	2011	J, Appl, Entomol, 135: 7–16	Susceptibility of European and North American populations of the European corn borer to the Cry1F insecticidal protein	y	USA	Lepidoptera	Crambidae	Ostrinia	Ostrinia nubilalis	F1, partly F1 + F2	neonates	surface	7 d		5	6	?	18975	probit analysis	Henderson Co, IL 2000	LC50	LC50	Cry1F	Cry1F	6.22	ng/cm2	1	6.22			(5,43–7,06		17.67	14,98–21,74	2,86 ± 0,22	4.76	5		y	n	n	y	y	y	y
	C, Gaspers, B, D, Siegfried2, T, Spencer2, A, P, Alves3, N, P, Storer4, I, Schuphan1 & S, Eber	2011	J, Appl, Entomol, 135: 7–16	Susceptibility of European and North American populations of the European corn borer to the Cry1F insecticidal protein	y	USA	Lepidoptera	Crambidae	Ostrinia	Ostrinia nubilalis	F1, partly F1 + F2	neonates	surface	7 d		5	6	?	18975	probit analysis	Moody Co, SD 2000	LC50	LC50	Cry1F	Cry1F	2.78	ng/cm2	1	2.78			1,76–3,79		8.69	6,28–14,58	2,64 ± 0,28	10.33	5		y	n	n	y	y	y	y
	C, Gaspers, B, D, Siegfried2, T, Spencer2, A, P, Alves3, N, P, Storer4, I, Schuphan1 & S, Eber	2011	J, Appl, Entomol, 135: 7–16	Susceptibility of European and North American populations of the European corn borer to the Cry1F insecticidal protein	y	USA	Lepidoptera	Crambidae	Ostrinia	Ostrinia nubilalis	F1, partly F1 + F2	neonates	surface	7 d		5	6	?	18975	probit analysis	Beadle Co, SD 2000	LC50	LC50	Cry1F	Cry1F	4.11	ng/cm2	1	4.11			3,51–4,62		7.87	6,90–9,54	4,54 ± 0,62	4.64	5		y	n	n	y	y	y	y
	C, Gaspers, B, D, Siegfried2, T, Spencer2, A, P, Alves3, N, P, Storer4, I, Schuphan1 & S, Eber	2011	J, Appl, Entomol, 135: 7–16	Susceptibility of European and North American populations of the European corn borer to the Cry1F insecticidal protein	y	USA	Lepidoptera	Crambidae	Ostrinia	Ostrinia nubilalis	F1, partly F1 + F2	neonates	surface	7 d		5	6	?	18975	probit analysis	Hamilton Co, NE 2001	LC50	LC50	Cry1F	Cry1F	3.65	ng/cm2	1	3.65			2,52–4,88		14.4	10,44–22,94	2,18 ± 0,17	8.38	5		y	n	n	y	y	y	y
	C, Gaspers, B, D, Siegfried2, T, Spencer2, A, P, Alves3, N, P, Storer4, I, Schuphan1 & S, Eber	2011	J, Appl, Entomol, 135: 7–16	Susceptibility of European and North American populations of the European corn borer to the Cry1F insecticidal protein	y	USA	Lepidoptera	Crambidae	Ostrinia	Ostrinia nubilalis	F1, partly F1 + F2	neonates	surface	7 d		5	6	?	18975	probit analysis	Champaign Co,2001	LC50	LC50	Cry1F	Cry1F	1.06	ng/cm2	1	1.06			0,86–1,27		3.09	2,59–3,87	2,88 ± 0,33	1.64	5		y	n	n	y	y	y	y
	C, Gaspers, B, D, Siegfried2, T, Spencer2, A, P, Alves3, N, P, Storer4, I, Schuphan1 & S, Eber	2011	J, Appl, Entomol, 135: 7–16	Susceptibility of European and North American populations of the European corn borer to the Cry1F insecticidal protein	y	USA	Lepidoptera	Crambidae	Ostrinia	Ostrinia nubilalis	F1, partly F1 + F2	neonates	surface	7 d		5	6	?	18975	probit analysis	Clinton Co, IA 2001	LC50	LC50	Cry1F	Cry1F	2.26	ng/cm2	1	2.26			1,38–3,06		8.05	5,99–12,80	2,32 ± 0,25	7.97	5		y	n	n	y	y	y	y
	C, Gaspers, B, D, Siegfried2, T, Spencer2, A, P, Alves3, N, P, Storer4, I, Schuphan1 & S, Eber	2011	J, Appl, Entomol, 135: 7–16	Susceptibility of European and North American populations of the European corn borer to the Cry1F insecticidal protein	y	USA	Lepidoptera	Crambidae	Ostrinia	Ostrinia nubilalis	F1, partly F1 + F2	neonates	surface	7 d		5	6	?	18975	probit analysis	Dakota Co, MN 2001	LC50	LC50	Cry1F	Cry1F	2.51	ng/cm2	1	2.51			1,84–3,16		7.92	6,11–11,70	2,59 ± 0,24	7.31	5		y	n	n	y	y	y	y
	C, Gaspers, B, D, Siegfried2, T, Spencer2, A, P, Alves3, N, P, Storer4, I, Schuphan1 & S, Eber	2011	J, Appl, Entomol, 135: 7–16	Susceptibility of European and North American populations of the European corn borer to the Cry1F insecticidal protein	y	USA	Lepidoptera	Crambidae	Ostrinia	Ostrinia nubilalis	F1, partly F1 + F2	neonates	surface	7 d		5	6	?	18975	probit analysis	DeKalb Co, IL #1 2001	LC50	LC50	Cry1F	Cry1F	1.44	ng/cm2	1	1.44			0,97–1,94		6.14	6,49–15,35	2,07 ± 0,18	6.84	5		y	n	n	y	y	y	y
	C, Gaspers, B, D, Siegfried2, T, Spencer2, A, P, Alves3, N, P, Storer4, I, Schuphan1 & S, Eber	2011	J, Appl, Entomol, 135: 7–16	Susceptibility of European and North American populations of the European corn borer to the Cry1F insecticidal protein	y	USA	Lepidoptera	Crambidae	Ostrinia	Ostrinia nubilalis	F1, partly F1 + F2	neonates	surface	7 d		5	6	?	18975	probit analysis	DeKalb Co, IL #2 2001	LC50	LC50	Cry1F	Cry1F	2.92	ng/cm2	1	2.92			(2,17–3,71		9.42	7,11–14,31	2,52 ± 0,20	8.77	5		y	n	n	y	y	y	y
	C, Gaspers, B, D, Siegfried2, T, Spencer2, A, P, Alves3, N, P, Storer4, I, Schuphan1 & S, Eber	2011	J, Appl, Entomol, 135: 7–16	Susceptibility of European and North American populations of the European corn borer to the Cry1F insecticidal protein	y	USA	Lepidoptera	Crambidae	Ostrinia	Ostrinia nubilalis	F1, partly F1 + F2	neonates	surface	7 d		5	6	?	18975	probit analysis	Goodhue Co, MN 2001	LC50	LC50	Cry1F	Cry1F	2.03	ng/cm2	1	2.03			1,00–3,29		13.08	7,68–32,34	1,67 ± 0,13	16.94	5		y	n	n	y	y	y	y
	C, Gaspers, B, D, Siegfried2, T, Spencer2, A, P, Alves3, N, P, Storer4, I, Schuphan1 & S, Eber	2011	J, Appl, Entomol, 135: 7–16	Susceptibility of European and North American populations of the European corn borer to the Cry1F insecticidal protein	y	USA	Lepidoptera	Crambidae	Ostrinia	Ostrinia nubilalis	F1, partly F1 + F2	neonates	surface	7 d		5	6	?	18975	probit analysis	Henry Co, IA 2001	LC50	LC50	Cry1F	Cry1F	1.98	ng/cm2	1	1.98			1,57–2,40		7.72	6,34–9,88	2,17 ± 0,20	2.43	5		y	n	n	y	y	y	y
	C, Gaspers, B, D, Siegfried2, T, Spencer2, A, P, Alves3, N, P, Storer4, I, Schuphan1 & S, Eber	2011	J, Appl, Entomol, 135: 7–16	Susceptibility of European and North American populations of the European corn borer to the Cry1F insecticidal protein	y	USA	Lepidoptera	Crambidae	Ostrinia	Ostrinia nubilalis	F1, partly F1 + F2	neonates	surface	7 d		5	6	?	18975	probit analysis	Saunders Co, NE 2001	LC50	LC50	Cry1F	Cry1F	2.31	ng/cm2	1	2.31			1,72–2,93		13.04	(15,90–31,07	1,70 ± 0,16	3.84	5		y	n	n	y	y	y	y
	C, Gaspers, B, D, Siegfried2, T, Spencer2, A, P, Alves3, N, P, Storer4, I, Schuphan1 & S, Eber	2011	J, Appl, Entomol, 135: 7–16	Susceptibility of European and North American populations of the European corn borer to the Cry1F insecticidal protein	y	USA	Lepidoptera	Crambidae	Ostrinia	Ostrinia nubilalis	F1, partly F1 + F2	neonates	surface	7 d		5	6	?	18975	probit analysis	Warren Co, IL 2001	LC50	LC50	Cry1F	Cry1F	1.42	ng/cm2	1	1.42			0,79–2,08		6.45	4,46–11,18	1,95 ± 0,19	9.11	5		y	n	n	y	y	y	y
2298	Gujar, G, T,, Mittal, A,, Kumari, A,, & Kalia, V,	2004	Entomologia Experimentalis Et Applicata, 113(3): 165-172	Host crop influence on the susceptibility of the American bollworm, Helicoverpa armigera, to Bacillus thuringiensis ssp kurstaki HD-73	y	India	Lepidoptera	Noctuidae	Helicoverpa	Helicoverpa armigera	F1	neonates	incorporation	96 h		6	3 - 5	30 - 50	> 210	probit analysis	Kanganhedi	LC50	LC50	Bacillus thuringiensis ssp, kurstaki HD-73 =Cry1Ac	Cry1Ac	106.72	µg/l	1	106.72			83,0 - 136,0				1,83 ± 0,30			x	y	n	y	y	y	y	y
2298	Gujar, G, T,, Mittal, A,, Kumari, A,, & Kalia, V,	2004	Entomologia Experimentalis Et Applicata, 113(3): 165-172	Host crop influence on the susceptibility of the American bollworm, Helicoverpa armigera, to Bacillus thuringiensis ssp kurstaki HD-73	y	India	Lepidoptera	Noctuidae	Helicoverpa	Helicoverpa armigera	F1	neonates	incorporation	96 h		6	3 - 5	30 - 50	> 210	probit analysis	Nagli	LC50	LC50	Bacillus thuringiensis ssp, kurstaki HD-73 =Cry1Ac	Cry1Ac	84.54	µg/l	1	84.54			64,7 - 105,7				1,94 ± 0,30
2298	Gujar, G, T,, Mittal, A,, Kumari, A,, & Kalia, V,	2004	Entomologia Experimentalis Et Applicata, 113(3): 165-172	Host crop influence on the susceptibility of the American bollworm, Helicoverpa armigera, to Bacillus thuringiensis ssp kurstaki HD-73	y	India	Lepidoptera	Noctuidae	Helicoverpa	Helicoverpa armigera	F1	neonates	incorporation	96 h		6	3 - 5	30 - 50	> 210	probit analysis	Bahadurgarh	LC50	LC50	Bacillus thuringiensis ssp, kurstaki HD-73 =Cry1Ac	Cry1Ac	161.12	µg/l	1	161.12			123,9 - 207,5				2,44 ± 0,62
2298	Gujar, G, T,, Mittal, A,, Kumari, A,, & Kalia, V,	2004	Entomologia Experimentalis Et Applicata, 113(3): 165-172	Host crop influence on the susceptibility of the American bollworm, Helicoverpa armigera, to Bacillus thuringiensis ssp kurstaki HD-73	y	India	Lepidoptera	Noctuidae	Helicoverpa	Helicoverpa armigera	F1	neonates	incorporation	96 h		6	3 - 5	30 - 50	> 210	probit analysis	Jonapura	LC50	LC50	Bacillus thuringiensis ssp, kurstaki HD-73 =Cry1Ac	Cry1Ac	164.21	µg/l	1	164.21			121,9 - 235,3				2,12 ± 0,54
2298	Gujar, G, T,, Mittal, A,, Kumari, A,, & Kalia, V,	2004	Entomologia Experimentalis Et Applicata, 113(3): 165-172	Host crop influence on the susceptibility of the American bollworm, Helicoverpa armigera, to Bacillus thuringiensis ssp kurstaki HD-73	y	India	Lepidoptera	Noctuidae	Helicoverpa	Helicoverpa armigera	F1	neonates	incorporation	96 h		6	3 - 5	30 - 50	> 210	probit analysis	Faridabad	LC50	LC50	Bacillus thuringiensis ssp, kurstaki HD-73 =Cry1Ac	Cry1Ac	84.73	µg/l	1	84.73			55,4 - 115,87				1,63 ± 0,36
2298	Gujar, G, T,, Mittal, A,, Kumari, A,, & Kalia, V,	2004	Entomologia Experimentalis Et Applicata, 113(3): 165-172	Host crop influence on the susceptibility of the American bollworm, Helicoverpa armigera, to Bacillus thuringiensis ssp kurstaki HD-73	y	India	Lepidoptera	Noctuidae	Helicoverpa	Helicoverpa armigera	F1	neonates	incorporation	96 h		6	3 - 5	30 - 50	> 210	probit analysis	Composite	LC50	LC50	Bacillus thuringiensis ssp, kurstaki HD-73 =Cry1Ac	Cry1Ac	128.14	µg/l	1	128.14			106,42 - 156,25				1,78 ± 0,22
2298	Gujar, G, T,, Mittal, A,, Kumari, A,, & Kalia, V,	2004	Entomologia Experimentalis Et Applicata, 113(3): 165-172	Host crop influence on the susceptibility of the American bollworm, Helicoverpa armigera, to Bacillus thuringiensis ssp kurstaki HD-73	y	India	Lepidoptera	Noctuidae	Helicoverpa	Helicoverpa armigera	F1	neonates	incorporation	96 h		6	3 - 5	30 - 50	> 210	probit analysis	Sirsa1	LC50	LC50	Bacillus thuringiensis ssp, kurstaki HD-73 =Cry1Ac	Cry1Ac	78.06	µg/l	1	78.06			59,4 - 96,4				1,99 ± 0,30
2298	Gujar, G, T,, Mittal, A,, Kumari, A,, & Kalia, V,	2004	Entomologia Experimentalis Et Applicata, 113(3): 165-172	Host crop influence on the susceptibility of the American bollworm, Helicoverpa armigera, to Bacillus thuringiensis ssp kurstaki HD-73	y	India	Lepidoptera	Noctuidae	Helicoverpa	Helicoverpa armigera	F1	neonates	incorporation	96 h		6	3 - 5	30 - 50	> 210	probit analysis	Sirsa2	LC50	LC50	Bacillus thuringiensis ssp, kurstaki HD-73 =Cry1Ac	Cry1Ac	98.6	µg/l	1	98.6			70,0 - 132,2				1,35 ± 0,27
2298	Gujar, G, T,, Mittal, A,, Kumari, A,, & Kalia, V,	2004	Entomologia Experimentalis Et Applicata, 113(3): 165-172	Host crop influence on the susceptibility of the American bollworm, Helicoverpa armigera, to Bacillus thuringiensis ssp kurstaki HD-73	y	India	Lepidoptera	Noctuidae	Helicoverpa	Helicoverpa armigera	F1	neonates	incorporation	96 h		6	3 - 5	30 - 50	> 210	probit analysis	Abohar	LC50	LC50	Bacillus thuringiensis ssp, kurstaki HD-73 =Cry1Ac	Cry1Ac	92.4	µg/l	1	92.4			66,8 - 119,1				2,16 ± 0,41
2298	Gujar, G, T,, Mittal, A,, Kumari, A,, & Kalia, V,	2004	Entomologia Experimentalis Et Applicata, 113(3): 165-172	Host crop influence on the susceptibility of the American bollworm, Helicoverpa armigera, to Bacillus thuringiensis ssp kurstaki HD-73	y	India	Lepidoptera	Noctuidae	Helicoverpa	Helicoverpa armigera	F1	neonates	incorporation	96 h		6	3 - 5	30 - 50	> 210	probit analysis	Kalatibba	LC50	LC50	Bacillus thuringiensis ssp, kurstaki HD-73 =Cry1Ac	Cry1Ac	51.06	µg/l	1	51.06			11,2 - 85,3				1,05 ± 0,35
2298	Gujar, G, T,, Mittal, A,, Kumari, A,, & Kalia, V,	2004	Entomologia Experimentalis Et Applicata, 113(3): 165-172	Host crop influence on the susceptibility of the American bollworm, Helicoverpa armigera, to Bacillus thuringiensis ssp kurstaki HD-73	y	India	Lepidoptera	Noctuidae	Helicoverpa	Helicoverpa armigera	F1	neonates	incorporation	96 h		6	3 - 5	30 - 50	> 210	probit analysis	Chakkatibba	LC50	LC50	Bacillus thuringiensis ssp, kurstaki HD-73 =Cry1Ac	Cry1Ac	185.3	µg/l	1	185.3			151,4 - 241,3				2,23 ± 0,45
2298	Gujar, G, T,, Mittal, A,, Kumari, A,, & Kalia, V,	2004	Entomologia Experimentalis Et Applicata, 113(3): 165-172	Host crop influence on the susceptibility of the American bollworm, Helicoverpa armigera, to Bacillus thuringiensis ssp kurstaki HD-73	y	India	Lepidoptera	Noctuidae	Helicoverpa	Helicoverpa armigera	F1	neonates	incorporation	96 h		6	3 - 5	30 - 50	> 210	probit analysis	Ganganagar	LC50	LC50	Bacillus thuringiensis ssp, kurstaki HD-73 =Cry1Ac	Cry1Ac	102.8	µg/l	1	102.8			62,7 - 160,0				1,20 ± 0,32
2298	Gujar, G, T,, Mittal, A,, Kumari, A,, & Kalia, V,	2004	Entomologia Experimentalis Et Applicata, 113(3): 165-172	Host crop influence on the susceptibility of the American bollworm, Helicoverpa armigera, to Bacillus thuringiensis ssp kurstaki HD-73	y	India	Lepidoptera	Noctuidae	Helicoverpa	Helicoverpa armigera	F1	neonates	incorporation	96 h		6	3 - 5	30 - 50	> 210	probit analysis	Bhatinda	LC50	LC50	Bacillus thuringiensis ssp, kurstaki HD-73 =Cry1Ac	Cry1Ac	247.7	µg/l	1	247.7			158,8 - 906,7				0,98 ± 0,32
2298	Gujar, G, T,, Mittal, A,, Kumari, A,, & Kalia, V,	2004	Entomologia Experimentalis Et Applicata, 113(3): 165-172	Host crop influence on the susceptibility of the American bollworm, Helicoverpa armigera, to Bacillus thuringiensis ssp kurstaki HD-73	y	India	Lepidoptera	Noctuidae	Helicoverpa	Helicoverpa armigera	F1	neonates	incorporation	96 h		6	3 - 5	30 - 50	> 210	probit analysis	Mansa	LC50	LC50	Bacillus thuringiensis ssp, kurstaki HD-73 =Cry1Ac	Cry1Ac	64.3	µg/l	1	64.3			28,0 - 96,5				1,27 ± 0,35
2298	Gujar, G, T,, Mittal, A,, Kumari, A,, & Kalia, V,	2004	Entomologia Experimentalis Et Applicata, 113(3): 165-172	Host crop influence on the susceptibility of the American bollworm, Helicoverpa armigera, to Bacillus thuringiensis ssp kurstaki HD-73	y	India	Lepidoptera	Noctuidae	Helicoverpa	Helicoverpa armigera	F1	neonates	incorporation	96 h		6	3 - 5	30 - 50	> 210	probit analysis	Compositeb	LC50	LC50	Bacillus thuringiensis ssp, kurstaki HD-73 =Cry1Ac	Cry1Ac	117.13	µg/l	1	117.13			95,41 - 144,58				1,42 ± 0,20
7	Gujar, G, T,, Kalia, V,, Kumari, A,, Singh, B, P,, Mittal, A,, Nair, R,, & Mohan, M,	2007	Journal of Invertebrate Pathology, 95(3): 214-219	Helicoverpa armigera baseline susceptibility to Bacillus thuringiensis Cry toxins and resistance management for Bt cotton in India	y	India	Lepidoptera	Noctuidae	Helicoverpa	Helicoverpa armigera	F1	neonates	incorporation	96 h							Sirsa	LC50	LC50	Cry1Ac/HD-73	Cry1Ac	0.08	µg/g	1000	80										x	y	n	n	n	n	n	y
7	Gujar, G, T,, Kalia, V,, Kumari, A,, Singh, B, P,, Mittal, A,, Nair, R,, & Mohan, M,	2007	Journal of Invertebrate Pathology, 95(3): 214-219	Helicoverpa armigera baseline susceptibility to Bacillus thuringiensis Cry toxins and resistance management for Bt cotton in India	y	India	Lepidoptera	Noctuidae	Helicoverpa	Helicoverpa armigera	F1	neonates	incorporation	96 h							Sirsa	LC50	LC50	Cry1Ac/HD-73	Cry1Ac	0.53	µg/g	1000	530										x	y	n	n	n	n	n	y
7	Gujar, G, T,, Kalia, V,, Kumari, A,, Singh, B, P,, Mittal, A,, Nair, R,, & Mohan, M,	2007	Journal of Invertebrate Pathology, 95(3): 214-219	Helicoverpa armigera baseline susceptibility to Bacillus thuringiensis Cry toxins and resistance management for Bt cotton in India	y	India	Lepidoptera	Noctuidae	Helicoverpa	Helicoverpa armigera	F1	neonates	incorporation	96 h							Sirsa	LC50	LC50	Cry1Ac/HD-73	Cry1Ac	2.95	µg/g	1000	2950										x	y	n	n	n	n	n	y
7	Gujar, G, T,, Kalia, V,, Kumari, A,, Singh, B, P,, Mittal, A,, Nair, R,, & Mohan, M,	2007	Journal of Invertebrate Pathology, 95(3): 214-219	Helicoverpa armigera baseline susceptibility to Bacillus thuringiensis Cry toxins and resistance management for Bt cotton in India	y	India	Lepidoptera	Noctuidae	Helicoverpa	Helicoverpa armigera	F1	neonates	incorporation	96 h							Sirsa	LC50	LC50	Cry1Ac/HD-73	Cry1Ac	3.34	µg/g	1000	3340										x	y	n	n	n	n	n	y
7	Gujar, G, T,, Kalia, V,, Kumari, A,, Singh, B, P,, Mittal, A,, Nair, R,, & Mohan, M,	2007	Journal of Invertebrate Pathology, 95(3): 214-219	Helicoverpa armigera baseline susceptibility to Bacillus thuringiensis Cry toxins and resistance management for Bt cotton in India	y	India	Lepidoptera	Noctuidae	Helicoverpa	Helicoverpa armigera	F1	neonates	incorporation	96 h							Sirsa	LC50	LC50	Cry1Ac/HD-73	Cry1Ac	0.42	µg/g	1000	420										x	y	n	n	n	n	n	y
7	Gujar, G, T,, Kalia, V,, Kumari, A,, Singh, B, P,, Mittal, A,, Nair, R,, & Mohan, M,	2007	Journal of Invertebrate Pathology, 95(3): 214-219	Helicoverpa armigera baseline susceptibility to Bacillus thuringiensis Cry toxins and resistance management for Bt cotton in India	y	India	Lepidoptera	Noctuidae	Helicoverpa	Helicoverpa armigera	F1	neonates	incorporation	96 h							Sirsa	LC50	LC50	Cry1Ac/HD-73	Cry1Ac	0.6	µg/g	1000	600										x	y	n	n	n	n	n	y
7	Gujar, G, T,, Kalia, V,, Kumari, A,, Singh, B, P,, Mittal, A,, Nair, R,, & Mohan, M,	2007	Journal of Invertebrate Pathology, 95(3): 214-219	Helicoverpa armigera baseline susceptibility to Bacillus thuringiensis Cry toxins and resistance management for Bt cotton in India	y	India	Lepidoptera	Noctuidae	Helicoverpa	Helicoverpa armigera	F1	neonates	incorporation	96 h							Delhi	LC50	LC50	Cry1Ac/HD-73	Cry1Ac	0.12	µg/g	1000	120										x	y	n	n	n	n	n	y
7	Gujar, G, T,, Kalia, V,, Kumari, A,, Singh, B, P,, Mittal, A,, Nair, R,, & Mohan, M,	2007	Journal of Invertebrate Pathology, 95(3): 214-219	Helicoverpa armigera baseline susceptibility to Bacillus thuringiensis Cry toxins and resistance management for Bt cotton in India	y	India	Lepidoptera	Noctuidae	Helicoverpa	Helicoverpa armigera	F1	neonates	incorporation	96 h							Delhi	LC50	LC50	Cry1Ac/HD-73	Cry1Ac	0.18	µg/g	1000	180										x	y	n	n	n	n	n	y
7	Gujar, G, T,, Kalia, V,, Kumari, A,, Singh, B, P,, Mittal, A,, Nair, R,, & Mohan, M,	2007	Journal of Invertebrate Pathology, 95(3): 214-219	Helicoverpa armigera baseline susceptibility to Bacillus thuringiensis Cry toxins and resistance management for Bt cotton in India	y	India	Lepidoptera	Noctuidae	Helicoverpa	Helicoverpa armigera	F1	neonates	incorporation	96 h							Delhi	LC50	LC50	Cry1Ac/HD-73	Cry1Ac	0.39	µg/g	1000	390										x	y	n	n	n	n	n	y
7	Gujar, G, T,, Kalia, V,, Kumari, A,, Singh, B, P,, Mittal, A,, Nair, R,, & Mohan, M,	2007	Journal of Invertebrate Pathology, 95(3): 214-219	Helicoverpa armigera baseline susceptibility to Bacillus thuringiensis Cry toxins and resistance management for Bt cotton in India	y	India	Lepidoptera	Noctuidae	Helicoverpa	Helicoverpa armigera	F1	neonates	incorporation	96 h							Delhi	LC50	LC50	Cry1Ac/HD-73	Cry1Ac	1.86	µg/g	1000	1860										x	y	n	n	n	n	n	y
7	Gujar, G, T,, Kalia, V,, Kumari, A,, Singh, B, P,, Mittal, A,, Nair, R,, & Mohan, M,	2007	Journal of Invertebrate Pathology, 95(3): 214-219	Helicoverpa armigera baseline susceptibility to Bacillus thuringiensis Cry toxins and resistance management for Bt cotton in India	y	India	Lepidoptera	Noctuidae	Helicoverpa	Helicoverpa armigera	F1	neonates	incorporation	96 h							Delhi	LC50	LC50	Cry1Ac/HD-73	Cry1Ac	4.5	µg/g	1000	4500										x	y	n	n	n	n	n	y
7	Gujar, G, T,, Kalia, V,, Kumari, A,, Singh, B, P,, Mittal, A,, Nair, R,, & Mohan, M,	2007	Journal of Invertebrate Pathology, 95(3): 214-219	Helicoverpa armigera baseline susceptibility to Bacillus thuringiensis Cry toxins and resistance management for Bt cotton in India	y	India	Lepidoptera	Noctuidae	Helicoverpa	Helicoverpa armigera	F1	neonates	incorporation	96 h							Delhi	LC50	LC50	Cry1Ac/HD-73	Cry1Ac	2.55	µg/g	1000	2550										x	y	n	n	n	n	n	y
7	Gujar, G, T,, Kalia, V,, Kumari, A,, Singh, B, P,, Mittal, A,, Nair, R,, & Mohan, M,	2007	Journal of Invertebrate Pathology, 95(3): 214-219	Helicoverpa armigera baseline susceptibility to Bacillus thuringiensis Cry toxins and resistance management for Bt cotton in India	y	India	Lepidoptera	Noctuidae	Helicoverpa	Helicoverpa armigera	F1	neonates	incorporation	96 h							Delhi	LC50	LC50	Cry1Ac/HD-73	Cry1Ac	1.13	µg/g	1000	1130										x	y	n	n	n	n	n	y
7	Gujar, G, T,, Kalia, V,, Kumari, A,, Singh, B, P,, Mittal, A,, Nair, R,, & Mohan, M,	2007	Journal of Invertebrate Pathology, 95(3): 214-219	Helicoverpa armigera baseline susceptibility to Bacillus thuringiensis Cry toxins and resistance management for Bt cotton in India	y	India	Lepidoptera	Noctuidae	Helicoverpa	Helicoverpa armigera	F1	neonates	incorporation	96 h							Delhi	LC50	LC50	Cry1Ac/HD-73	Cry1Ac	1.77	µg/g	1000	1770										x	y	n	n	n	n	n	y
7	Gujar, G, T,, Kalia, V,, Kumari, A,, Singh, B, P,, Mittal, A,, Nair, R,, & Mohan, M,	2007	Journal of Invertebrate Pathology, 95(3): 214-219	Helicoverpa armigera baseline susceptibility to Bacillus thuringiensis Cry toxins and resistance management for Bt cotton in India	y	India	Lepidoptera	Noctuidae	Helicoverpa	Helicoverpa armigera	F1	neonates	incorporation	96 h							Delhi	LC50	LC50	Cry1Ac/HD-73	Cry1Ac	0.64	µg/g	1000	640										x	y	n	n	n	n	n	y
7	Gujar, G, T,, Kalia, V,, Kumari, A,, Singh, B, P,, Mittal, A,, Nair, R,, & Mohan, M,	2007	Journal of Invertebrate Pathology, 95(3): 214-219	Helicoverpa armigera baseline susceptibility to Bacillus thuringiensis Cry toxins and resistance management for Bt cotton in India	y	India	Lepidoptera	Noctuidae	Helicoverpa	Helicoverpa armigera	F1	neonates	incorporation	96 h							Bhatinda	LC50	LC50	Cry1Ac/HD-73	Cry1Ac	0.04	µg/g	1000	40										x	y	n	n	n	n	n	y
7	Gujar, G, T,, Kalia, V,, Kumari, A,, Singh, B, P,, Mittal, A,, Nair, R,, & Mohan, M,	2007	Journal of Invertebrate Pathology, 95(3): 214-219	Helicoverpa armigera baseline susceptibility to Bacillus thuringiensis Cry toxins and resistance management for Bt cotton in India	y	India	Lepidoptera	Noctuidae	Helicoverpa	Helicoverpa armigera	F1	neonates	incorporation	96 h							Bhatinda	LC50	LC50	Cry1Ac/HD-74	Cry1Ac	0.25	µg/g	1000	250										x	y	n	n	n	n	n	y
7	Gujar, G, T,, Kalia, V,, Kumari, A,, Singh, B, P,, Mittal, A,, Nair, R,, & Mohan, M,	2007	Journal of Invertebrate Pathology, 95(3): 214-219	Helicoverpa armigera baseline susceptibility to Bacillus thuringiensis Cry toxins and resistance management for Bt cotton in India	y	India	Lepidoptera	Noctuidae	Helicoverpa	Helicoverpa armigera	F1	neonates	incorporation	96 h							Bhatinda	LC50	LC50	Cry1Ac/HD-75	Cry1Ac	5.14	µg/g	1000	5140										x	y	n	n	n	n	n	y
7	Gujar, G, T,, Kalia, V,, Kumari, A,, Singh, B, P,, Mittal, A,, Nair, R,, & Mohan, M,	2007	Journal of Invertebrate Pathology, 95(3): 214-219	Helicoverpa armigera baseline susceptibility to Bacillus thuringiensis Cry toxins and resistance management for Bt cotton in India	y	India	Lepidoptera	Noctuidae	Helicoverpa	Helicoverpa armigera	F1	neonates	incorporation	96 h							Nanded	LC50	LC50	Cry1Ac	Cry1Ac	0.3	µg/g	1000	300			0,23 - 0,40				2,00 ± 0,31			x	y	n	n	n	n	n	y
7	Gujar, G, T,, Kalia, V,, Kumari, A,, Singh, B, P,, Mittal, A,, Nair, R,, & Mohan, M,	2007	Journal of Invertebrate Pathology, 95(3): 214-219	Helicoverpa armigera baseline susceptibility to Bacillus thuringiensis Cry toxins and resistance management for Bt cotton in India	y	India	Lepidoptera	Noctuidae	Helicoverpa	Helicoverpa armigera	F1	neonates	incorporation	96 h							Nanded	LC50	LC50	Cry1Ac	Cry1Ac	5.42	µg/g	1000	5420			3,77 - 8,83				1,39 ± 0,22			x	y	n	n	n	n	n	y
528	Gujar, G, T,, Nair, R,, Singh, B, P,, Kumari, A,, & Kalia, V,	2008	Crop Protection, 27(3GÇô5): 537-544	Toxicity to the cotton bollworm, Helicoverpa armigera, of some Cry1Ac toxins expressed in cotton in India	y	India	Lepidoptera	Noctuidae	Helicoverpa	Helicoverpa armigera	F1	neonates	incorporation	96 h		a series	3 - 5	30 - 50	> 180 per each bioassay	probit analysis	Akola	LC50	LC50	Cry1Ac (E,coli produced, trypsin-activated)	Cry1Ac	5.16	µg/g	1000	5160			3,82–7,54	LC99 μg/g	110.41	46,78–548,47	1,74 ± 0,3	18.4		x	y	N	y	y	y	n	y
528	Gujar, G, T,, Nair, R,, Singh, B, P,, Kumari, A,, & Kalia, V,	2008	Crop Protection, 27(3GÇô5): 537-544	Toxicity to the cotton bollworm, Helicoverpa armigera, of some Cry1Ac toxins expressed in cotton in India	y	India	Lepidoptera	Noctuidae	Helicoverpa	Helicoverpa armigera	F1	neonates	incorporation	96 h		a series	3 - 5	30 - 50	> 180 per each bioassay	probit analysis	Indore	LC50	LC50	Cry1Ac (E,coli produced, trypsin-activated)	Cry1Ac	2.32	µg/g	1000	2320			1,46–3,93		147.87	39,44–3415,46	1,29 ± 0,3	1.3
528	Gujar, G, T,, Nair, R,, Singh, B, P,, Kumari, A,, & Kalia, V,	2008	Crop Protection, 27(3GÇô5): 537-544	Toxicity to the cotton bollworm, Helicoverpa armigera, of some Cry1Ac toxins expressed in cotton in India	y	India	Lepidoptera	Noctuidae	Helicoverpa	Helicoverpa armigera	F1	neonates	incorporation	96 h		a series	3 - 5	30 - 50	> 180 per each bioassay	probit analysis	Coimbatore	LC50	LC50	Cry1Ac (E,coli produced, trypsin-activated)	Cry1Ac	1.3	µg/g	1000	1300			0,85–1,98		84.95	29,49–618,09	1,28 ± 0,2	2.3
528	Gujar, G, T,, Nair, R,, Singh, B, P,, Kumari, A,, & Kalia, V,	2008	Crop Protection, 27(3GÇô5): 537-544	Toxicity to the cotton bollworm, Helicoverpa armigera, of some Cry1Ac toxins expressed in cotton in India	y	India	Lepidoptera	Noctuidae	Helicoverpa	Helicoverpa armigera	F1	neonates	incorporation	96 h		a series	3 - 5	30 - 50	> 180 per each bioassay	probit analysis	Nanded	LC50	LC50	Cry1Ac (E,coli produced, trypsin-activated)	Cry1Ac	5.42	µg/g	1000	5420			3,77–8,83		251.64	85,00–1860,25	1,39 ± 0,2	14.1
528	Gujar, G, T,, Nair, R,, Singh, B, P,, Kumari, A,, & Kalia, V,	2008	Crop Protection, 27(3GÇô5): 537-544	Toxicity to the cotton bollworm, Helicoverpa armigera, of some Cry1Ac toxins expressed in cotton in India	y	India	Lepidoptera	Noctuidae	Helicoverpa	Helicoverpa armigera	F1	neonates	incorporation	96 h		a series	3 - 5	30 - 50	> 180 per each bioassay	probit analysis	Satna	LC50	LC50	Cry1Ac (E,coli produced, trypsin-activated)	Cry1Ac	3.58	µg/g	1000	3580			2,03–8,39		1070.89	163,03–72564,5	0,94 ± 0,2	2.9
528	Gujar, G, T,, Nair, R,, Singh, B, P,, Kumari, A,, & Kalia, V,	2008	Crop Protection, 27(3GÇô5): 537-544	Toxicity to the cotton bollworm, Helicoverpa armigera, of some Cry1Ac toxins expressed in cotton in India	y	India	Lepidoptera	Noctuidae	Helicoverpa	Helicoverpa armigera	F1	neonates	incorporation	96 h		a series	3 - 5	30 - 50	> 180 per each bioassay	probit analysis	Rahuri	LC50	LC50	Cry1Ac (E,coli produced, trypsin-activated)	Cry1Ac	0.68	µg/g	1000	680			0,36–1,12		182.03	56,02–1429,61	0,96 ± 0,1	0.8
528	Gujar, G, T,, Nair, R,, Singh, B, P,, Kumari, A,, & Kalia, V,	2008	Crop Protection, 27(3GÇô5): 537-544	Toxicity to the cotton bollworm, Helicoverpa armigera, of some Cry1Ac toxins expressed in cotton in India	y	India	Lepidoptera	Noctuidae	Helicoverpa	Helicoverpa armigera	F1	neonates	incorporation	96 h		a series	3 - 5	30 - 50	> 180 per each bioassay	probit analysis	IARI (New Delhi)	LC50	LC50	Cry1Ac (E,coli produced, trypsin-activated)	Cry1Ac	4.5	µg/g	1000	4500			2,85–8,74		929.81	177,17–32150,7	1,01 ± 0,2	13.4
528	Gujar, G, T,, Nair, R,, Singh, B, P,, Kumari, A,, & Kalia, V,	2008	Crop Protection, 27(3GÇô5): 537-544	Toxicity to the cotton bollworm, Helicoverpa armigera, of some Cry1Ac toxins expressed in cotton in India	y	India	Lepidoptera	Noctuidae	Helicoverpa	Helicoverpa armigera	F1	neonates	incorporation	96 h		a series	3 - 5	30 - 50	> 180 per each bioassay	probit analysis	Ludhiana	LC50	LC50	Cry1Ac (E,coli produced, trypsin-activated)	Cry1Ac	0.3	µg/g	1000	300			0,16–0,56		417.47	76,85–10888,44	0,46 ± 0,1	22.3
528	Gujar, G, T,, Nair, R,, Singh, B, P,, Kumari, A,, & Kalia, V,	2008	Crop Protection, 27(3GÇô5): 537-544	Toxicity to the cotton bollworm, Helicoverpa armigera, of some Cry1Ac toxins expressed in cotton in India	y	India	Lepidoptera	Noctuidae	Helicoverpa	Helicoverpa armigera	F1	neonates	incorporation	96 h		a series	3 - 5	30 - 50	> 180 per each bioassay	probit analysis	Hisar	LC50	LC50	Cry1Ac (E,coli produced, trypsin-activated)	Cry1Ac	1.13	µg/g	1000	1130			0,67–2,18		382.14	72,18–10176,71	0,92 ± 0,1	27.2
528	Gujar, G, T,, Nair, R,, Singh, B, P,, Kumari, A,, & Kalia, V,	2008	Crop Protection, 27(3GÇô5): 537-544	Toxicity to the cotton bollworm, Helicoverpa armigera, of some Cry1Ac toxins expressed in cotton in India	y	India	Lepidoptera	Noctuidae	Helicoverpa	Helicoverpa armigera	F1	neonates	incorporation	96 h		a series	3 - 5	30 - 50	> 180 per each bioassay	probit analysis	Karnal	LC50	LC50	Cry1Ac (E,coli produced, trypsin-activated)	Cry1Ac	1.06	µg/g	1000	1060			0,48–3,66		–	–	0,63 ± 0,1	4.7
528	Gujar, G, T,, Nair, R,, Singh, B, P,, Kumari, A,, & Kalia, V,	2008	Crop Protection, 27(3GÇô5): 537-544	Toxicity to the cotton bollworm, Helicoverpa armigera, of some Cry1Ac toxins expressed in cotton in India	y	India	Lepidoptera	Noctuidae	Helicoverpa	Helicoverpa armigera	F1	neonates	incorporation	96 h		a series	3 - 5	30 - 50	> 180 per each bioassay	probit analysis	Faridkot	LC50	LC50	Cry1Ac (E,coli produced, trypsin-activated)	Cry1Ac	0.32	µg/g	1000	320			0,14–0,63		988.45	136,7–49190,2	0,67 ± 0,1	4.7
528	Gujar, G, T,, Nair, R,, Singh, B, P,, Kumari, A,, & Kalia, V,	2008	Crop Protection, 27(3GÇô5): 537-544	Toxicity to the cotton bollworm, Helicoverpa armigera, of some Cry1Ac toxins expressed in cotton in India	y	India	Lepidoptera	Noctuidae	Helicoverpa	Helicoverpa armigera	F1	neonates	incorporation	96 h		a series	3 - 5	30 - 50	> 180 per each bioassay	probit analysis	Punchkula	LC50	LC50	Cry1Ac (E,coli produced, trypsin-activated)	Cry1Ac	3.09	µg/g	1000	3090			1,15–21,14		–	–	0,67 ± 0,1	3.6
528	Gujar, G, T,, Nair, R,, Singh, B, P,, Kumari, A,, & Kalia, V,	2008	Crop Protection, 27(3GÇô5): 537-544	Toxicity to the cotton bollworm, Helicoverpa armigera, of some Cry1Ac toxins expressed in cotton in India	y	India	Lepidoptera	Noctuidae	Helicoverpa	Helicoverpa armigera	F1	neonates	incorporation	96 h		a series	3 - 5	30 - 50	> 180 per each bioassay	probit analysis	Vadodara	LC50	LC50	Cry1Ac (E,coli produced, trypsin-activated)	Cry1Ac	0.462	µg/g	1000	462			0,27–1,06		169.76	21,25–39570,46	0,80 ± 0,1	0.3
528	Gujar, G, T,, Nair, R,, Singh, B, P,, Kumari, A,, & Kalia, V,	2008	Crop Protection, 27(3GÇô5): 537-544	Toxicity to the cotton bollworm, Helicoverpa armigera, of some Cry1Ac toxins expressed in cotton in India	y	India	Lepidoptera	Noctuidae	Helicoverpa	Helicoverpa armigera	F1	neonates	incorporation	96 h		a series	3 - 5	30 - 50	> 180 per each bioassay	probit analysis	Hyderabad	LC50	LC50	Cry1Ac (E,coli produced, trypsin-activated)	Cry1Ac	0.57	µg/g	1000	570			0,25–2,25		–	–	0,50 ± 0,1	0.4
528	Gujar, G, T,, Nair, R,, Singh, B, P,, Kumari, A,, & Kalia, V,	2008	Crop Protection, 27(3GÇô5): 537-544	Toxicity to the cotton bollworm, Helicoverpa armigera, of some Cry1Ac toxins expressed in cotton in India	y	India	Lepidoptera	Noctuidae	Helicoverpa	Helicoverpa armigera	F1	neonates	incorporation	96 h		a series	3 - 5	30 - 50	> 180 per each bioassay	probit analysis	Basurgaddy	LC50	LC50	Cry1Ac (E,coli produced, trypsin-activated)	Cry1Ac	0.24	µg/g	1000	240			0,11–0,43		96.04	26,91–951,6	0,91 ± 0,1	15.8
528	Gujar, G, T,, Nair, R,, Singh, B, P,, Kumari, A,, & Kalia, V,	2008	Crop Protection, 27(3GÇô5): 537-544	Toxicity to the cotton bollworm, Helicoverpa armigera, of some Cry1Ac toxins expressed in cotton in India	y	India	Lepidoptera	Noctuidae	Helicoverpa	Helicoverpa armigera	F1	neonates	incorporation	96 h		a series	3 - 5	30 - 50	> 180 per each bioassay	probit analysis	Katni	LC50	LC50	Cry1Ac (E,coli produced, trypsin-activated)	Cry1Ac	0.88	µg/g	1000	880			0,37–2,36		–	–	0,65 ± 0,1	3.2
528	Gujar, G, T,, Nair, R,, Singh, B, P,, Kumari, A,, & Kalia, V,	2008	Crop Protection, 27(3GÇô5): 537-544	Toxicity to the cotton bollworm, Helicoverpa armigera, of some Cry1Ac toxins expressed in cotton in India	y	India	Lepidoptera	Noctuidae	Helicoverpa	Helicoverpa armigera	F1	neonates	incorporation	96 h		a series	3 - 5	30 - 50	> 180 per each bioassay	probit analysis	Jalna	LC50	LC50	Cry1Ac (E,coli produced, trypsin-activated)	Cry1Ac	0.21	µg/g	1000	210			0,14–0,29		7.1	3,12–32,66	0,65 ± 0,1	6.3
528	Gujar, G, T,, Nair, R,, Singh, B, P,, Kumari, A,, & Kalia, V,	2008	Crop Protection, 27(3GÇô5): 537-544	Toxicity to the cotton bollworm, Helicoverpa armigera, of some Cry1Ac toxins expressed in cotton in India	y	India	Lepidoptera	Noctuidae	Helicoverpa	Helicoverpa armigera	F1	neonates	incorporation	96 h		a series	3 - 5	30 - 50	> 180 per each bioassay	probit analysis	Khandwa	LC50	LC50	Cry1Ac (E,coli produced, trypsin-activated)	Cry1Ac	0.175	µg/g	1000	175			0,104–0,50		44.67	5,15–30983,62	0,83 ± 0,1	1.6
528	Gujar, G, T,, Nair, R,, Singh, B, P,, Kumari, A,, & Kalia, V,	2008	Crop Protection, 27(3GÇô5): 537-544	Toxicity to the cotton bollworm, Helicoverpa armigera, of some Cry1Ac toxins expressed in cotton in India	y	India	Lepidoptera	Noctuidae	Helicoverpa	Helicoverpa armigera	F1	neonates	incorporation	96 h		a series	3 - 5	30 - 50	> 180 per each bioassay	probit analysis	Raichur	LC50	LC50	Cry1Ac (E,coli produced, trypsin-activated)	Cry1Ac	0.158	µg/g	1000	158			0,08–0,38		72.42	16,45–1137,95	0,68 ± 0,1	0.5
528	Gujar, G, T,, Nair, R,, Singh, B, P,, Kumari, A,, & Kalia, V,	2008	Crop Protection, 27(3GÇô5): 537-544	Toxicity to the cotton bollworm, Helicoverpa armigera, of some Cry1Ac toxins expressed in cotton in India	y	India	Lepidoptera	Noctuidae	Helicoverpa	Helicoverpa armigera	F1	neonates	incorporation	96 h		a series	3 - 5	30 - 50	> 180 per each bioassay	probit analysis	Hisar	LC50	LC50	Cry1Ac (E,coli produced, trypsin-activated)	Cry1Ac	0.29	µg/g	1000	290			0,118–0,71		232.84	29,11–20432,58	0,92 ± 0,2	3.8
528	Gujar, G, T,, Nair, R,, Singh, B, P,, Kumari, A,, & Kalia, V,	2008	Crop Protection, 27(3GÇô5): 537-544	Toxicity to the cotton bollworm, Helicoverpa armigera, of some Cry1Ac toxins expressed in cotton in India	y	India	Lepidoptera	Noctuidae	Helicoverpa	Helicoverpa armigera	F1	neonates	incorporation	96 h		a series	3 - 5	30 - 50	> 180 per each bioassay	probit analysis	Sirsa	LC50	LC50	Cry1Ac (E,coli produced, trypsin-activated)	Cry1Ac	0.42	µg/g	1000	420			0,31–0,56		5.61	3,053–16,98	2,07 ± 0,3	8.7
528	Gujar, G, T,, Nair, R,, Singh, B, P,, Kumari, A,, & Kalia, V,	2008	Crop Protection, 27(3GÇô5): 537-544	Toxicity to the cotton bollworm, Helicoverpa armigera, of some Cry1Ac toxins expressed in cotton in India	y	India	Lepidoptera	Noctuidae	Helicoverpa	Helicoverpa armigera	F1	neonates	incorporation	96 h		a series	3 - 5	30 - 50	> 180 per each bioassay	probit analysis	Nagpur	LC50	LC50	Cry1Ac (E,coli produced, trypsin-activated)	Cry1Ac	0.65	µg/g	1000	650			0,41–1,39		171.63	23,02–49216,75	0,96 ± 0,2	0.6
528	Gujar, G, T,, Nair, R,, Singh, B, P,, Kumari, A,, & Kalia, V,	2008	Crop Protection, 27(3GÇô5): 537-544	Toxicity to the cotton bollworm, Helicoverpa armigera, of some Cry1Ac toxins expressed in cotton in India	y	India	Lepidoptera	Noctuidae	Helicoverpa	Helicoverpa armigera	F1	neonates	incorporation	96 h		a series	3 - 5	30 - 50	> 180 per each bioassay	probit analysis	Rajkot	LC50	LC50	Cry1Ac (E,coli produced, trypsin-activated)	Cry1Ac	0.19	µg/g	1000	190			0,116–0,33		23.78	4,50–2479,36	1,11 ± 0,3	0.9
528	Gujar, G, T,, Nair, R,, Singh, B, P,, Kumari, A,, & Kalia, V,	2008	Crop Protection, 27(3GÇô5): 537-544	Toxicity to the cotton bollworm, Helicoverpa armigera, of some Cry1Ac toxins expressed in cotton in India	y	India	Lepidoptera	Noctuidae	Helicoverpa	Helicoverpa armigera	F1	neonates	incorporation	96 h		a series	3 - 5	30 - 50	> 180 per each bioassay	probit analysis	Akola	LC50	LC50	Cry1Ac (grounded seeds)	Cry1Ac	3.36	µg/g	1000	3360			2,17–9,55	LC99 μg/g	59.81	16,37–2488,9	1,9 ± 0,5	1.6
528	Gujar, G, T,, Nair, R,, Singh, B, P,, Kumari, A,, & Kalia, V,	2008	Crop Protection, 27(3GÇô5): 537-544	Toxicity to the cotton bollworm, Helicoverpa armigera, of some Cry1Ac toxins expressed in cotton in India	y	India	Lepidoptera	Noctuidae	Helicoverpa	Helicoverpa armigera	F1	neonates	incorporation	96 h		a series	3 - 5	30 - 50	> 180 per each bioassay	probit analysis	Indore	LC50	LC50	Cry1Ac (grounded seeds)	Cry1Ac	2.19	µg/g	1000	2190			1,70–2,93		22.51	10,99–110,49	2,3 ± 0,5	3.1
528	Gujar, G, T,, Nair, R,, Singh, B, P,, Kumari, A,, & Kalia, V,	2008	Crop Protection, 27(3GÇô5): 537-544	Toxicity to the cotton bollworm, Helicoverpa armigera, of some Cry1Ac toxins expressed in cotton in India	y	India	Lepidoptera	Noctuidae	Helicoverpa	Helicoverpa armigera	F1	neonates	incorporation	96 h		a series	3 - 5	30 - 50	> 180 per each bioassay	probit analysis	Coimbatore	LC50	LC50	Cry1Ac (grounded seeds)	Cry1Ac	0.83	µg/g	1000	830			0,66–1,09		2.13	5,37–34,49	2,1 ± 0,3	0.6
528	Gujar, G, T,, Nair, R,, Singh, B, P,, Kumari, A,, & Kalia, V,	2008	Crop Protection, 27(3GÇô5): 537-544	Toxicity to the cotton bollworm, Helicoverpa armigera, of some Cry1Ac toxins expressed in cotton in India	y	India	Lepidoptera	Noctuidae	Helicoverpa	Helicoverpa armigera	F1	neonates	incorporation	96 h		a series	3 - 5	30 - 50	> 180 per each bioassay	probit analysis	Nanded	LC50	LC50	Cry1Ac (grounded seeds)	Cry1Ac	5.76	µg/g	1000	5760			3,16–44,73		–	–	1,1 ± 0,3	0.2
528	Gujar, G, T,, Nair, R,, Singh, B, P,, Kumari, A,, & Kalia, V,	2008	Crop Protection, 27(3GÇô5): 537-544	Toxicity to the cotton bollworm, Helicoverpa armigera, of some Cry1Ac toxins expressed in cotton in India	y	India	Lepidoptera	Noctuidae	Helicoverpa	Helicoverpa armigera	F1	neonates	incorporation	96 h		a series	3 - 5	30 - 50	> 180 per each bioassay	probit analysis	Satna	LC50	LC50	Cry1Ac (grounded seeds)	Cry1Ac	0.55	µg/g	1000	550			0,36–0,79		20.41	9,19–82,79	1,5 ± 0,2	1.7
528	Gujar, G, T,, Nair, R,, Singh, B, P,, Kumari, A,, & Kalia, V,	2008	Crop Protection, 27(3GÇô5): 537-544	Toxicity to the cotton bollworm, Helicoverpa armigera, of some Cry1Ac toxins expressed in cotton in India	y	India	Lepidoptera	Noctuidae	Helicoverpa	Helicoverpa armigera	F1	neonates	incorporation	96 h		a series	3 - 5	30 - 50	> 180 per each bioassay	probit analysis	Rahuri	LC50	LC50	Cry1Ac (grounded seeds)	Cry1Ac	0.2	µg/g	1000	200			0,10–0,31		10	4,36–48,43	1,4 ± 0,2	2.1
528	Gujar, G, T,, Nair, R,, Singh, B, P,, Kumari, A,, & Kalia, V,	2008	Crop Protection, 27(3GÇô5): 537-544	Toxicity to the cotton bollworm, Helicoverpa armigera, of some Cry1Ac toxins expressed in cotton in India	y	India	Lepidoptera	Noctuidae	Helicoverpa	Helicoverpa armigera	F1	neonates	incorporation	96 h		a series	3 - 5	30 - 50	> 180 per each bioassay	probit analysis	IARI (New Delhi)	LC50	LC50	Cry1Ac (grounded seeds)	Cry1Ac	1.98	µg/g	1000	1980			1,35–2,94		42.79	16,24–441,5	1,7 ± 0,4	1.3
528	Gujar, G, T,, Nair, R,, Singh, B, P,, Kumari, A,, & Kalia, V,	2008	Crop Protection, 27(3GÇô5): 537-544	Toxicity to the cotton bollworm, Helicoverpa armigera, of some Cry1Ac toxins expressed in cotton in India	y	India	Lepidoptera	Noctuidae	Helicoverpa	Helicoverpa armigera	F1	neonates	incorporation	96 h		a series	3 - 5	30 - 50	> 180 per each bioassay	probit analysis	Ludhiana	LC50	LC50	Cry1Ac (grounded seeds)	Cry1Ac	0.41	µg/g	1000	410			0,22–0,53		49.46	15,85–479,61	1,1 ± 0,2	0.3
528	Gujar, G, T,, Nair, R,, Singh, B, P,, Kumari, A,, & Kalia, V,	2008	Crop Protection, 27(3GÇô5): 537-544	Toxicity to the cotton bollworm, Helicoverpa armigera, of some Cry1Ac toxins expressed in cotton in India	y	India	Lepidoptera	Noctuidae	Helicoverpa	Helicoverpa armigera	F1	neonates	incorporation	96 h		a series	3 - 5	30 - 50	> 180 per each bioassay	probit analysis	Hisar	LC50	LC50	Cry1Ac (grounded seeds)	Cry1Ac	0.37	µg/g	1000	370			0,26–0,51		5.35	3,01–14,00	2,0 ± 0,3	0.8
528	Gujar, G, T,, Nair, R,, Singh, B, P,, Kumari, A,, & Kalia, V,	2008	Crop Protection, 27(3GÇô5): 537-544	Toxicity to the cotton bollworm, Helicoverpa armigera, of some Cry1Ac toxins expressed in cotton in India	y	India	Lepidoptera	Noctuidae	Helicoverpa	Helicoverpa armigera	F1	neonates	incorporation	96 h		a series	3 - 5	30 - 50	> 180 per each bioassay	probit analysis	Karnal	LC50	LC50	Cry1Ac (grounded seeds)	Cry1Ac	0.33	µg/g	1000	330			0,21–0,47		8.35	4,24–26,83	1,7 ± 0,2	2.8
528	Gujar, G, T,, Nair, R,, Singh, B, P,, Kumari, A,, & Kalia, V,	2008	Crop Protection, 27(3GÇô5): 537-544	Toxicity to the cotton bollworm, Helicoverpa armigera, of some Cry1Ac toxins expressed in cotton in India	y	India	Lepidoptera	Noctuidae	Helicoverpa	Helicoverpa armigera	F1	neonates	incorporation	96 h		a series	3 - 5	30 - 50	> 180 per each bioassay	probit analysis	Sirsa	LC50	LC50	Cry1Ac (grounded seeds)	Cry1Ac	1.37	µg/g	1000	1370			0,96–2,0		47.78	19,35–247,23	1,5 ± 0,2	0.9
528	Gujar, G, T,, Nair, R,, Singh, B, P,, Kumari, A,, & Kalia, V,	2008	Crop Protection, 27(3GÇô5): 537-544	Toxicity to the cotton bollworm, Helicoverpa armigera, of some Cry1Ac toxins expressed in cotton in India	y	India	Lepidoptera	Noctuidae	Helicoverpa	Helicoverpa armigera	F1	neonates	incorporation	96 h		a series	3 - 5	30 - 50	> 180 per each bioassay	probit analysis	Faridkot	LC50	LC50	Cry1Ac (grounded seeds)	Cry1Ac	0.2	µg/g	1000	200			0,12–0,28		2.47	1,37–7,43	2,1 ± 0,4	0.5
528	Gujar, G, T,, Nair, R,, Singh, B, P,, Kumari, A,, & Kalia, V,	2008	Crop Protection, 27(3GÇô5): 537-544	Toxicity to the cotton bollworm, Helicoverpa armigera, of some Cry1Ac toxins expressed in cotton in India	y	India	Lepidoptera	Noctuidae	Helicoverpa	Helicoverpa armigera	F1	neonates	incorporation	96 h		a series	3 - 5	30 - 50	> 180 per each bioassay	probit analysis	Punchkula	LC50	LC50	Cry1Ac (grounded seeds)	Cry1Ac	0.64	µg/g	1000	640			0,28–1,18		428.4	58,54–8355,02	0,8 ± 0,2	1.1
528	Gujar, G, T,, Nair, R,, Singh, B, P,, Kumari, A,, & Kalia, V,	2008	Crop Protection, 27(3GÇô5): 537-544	Toxicity to the cotton bollworm, Helicoverpa armigera, of some Cry1Ac toxins expressed in cotton in India	y	India	Lepidoptera	Noctuidae	Helicoverpa	Helicoverpa armigera	F1	neonates	incorporation	96 h		a series	3 - 5	30 - 50	> 180 per each bioassay	probit analysis	Vadodara	LC50	LC50	Cry1Ac (grounded seeds)	Cry1Ac	0.95	µg/g	1000	950			0,63–1,39		46.96	18,0–269,53	1,4 ± 0,2	2.2
528	Gujar, G, T,, Nair, R,, Singh, B, P,, Kumari, A,, & Kalia, V,	2008	Crop Protection, 27(3GÇô5): 537-544	Toxicity to the cotton bollworm, Helicoverpa armigera, of some Cry1Ac toxins expressed in cotton in India	y	India	Lepidoptera	Noctuidae	Helicoverpa	Helicoverpa armigera	F1	neonates	incorporation	96 h		a series	3 - 5	30 - 50	> 180 per each bioassay	probit analysis	Hyderabad	LC50	LC50	Cry1Ac (grounded seeds)	Cry1Ac	0.52	µg/g	1000	520			0,31–0,79		29.98	11,47–192,21	1,3 ± 0,2	8.5
528	Gujar, G, T,, Nair, R,, Singh, B, P,, Kumari, A,, & Kalia, V,	2008	Crop Protection, 27(3GÇô5): 537-544	Toxicity to the cotton bollworm, Helicoverpa armigera, of some Cry1Ac toxins expressed in cotton in India	y	India	Lepidoptera	Noctuidae	Helicoverpa	Helicoverpa armigera	F1	neonates	incorporation	96 h		a series	3 - 5	30 - 50	> 180 per each bioassay	probit analysis	Basurgaddy	LC50	LC50	Cry1Ac (grounded seeds)	Cry1Ac	0.35	µg/g	1000	350			0,20–0,55		33.19	1,41–188,37	1,2 ± 0,2	6.9
528	Gujar, G, T,, Nair, R,, Singh, B, P,, Kumari, A,, & Kalia, V,	2008	Crop Protection, 27(3GÇô5): 537-544	Toxicity to the cotton bollworm, Helicoverpa armigera, of some Cry1Ac toxins expressed in cotton in India	y	India	Lepidoptera	Noctuidae	Helicoverpa	Helicoverpa armigera	F1	neonates	incorporation	96 h		a series	3 - 5	30 - 50	> 180 per each bioassay	probit analysis	Katni	LC50	LC50	Cry1Ac (grounded seeds)	Cry1Ac	0.54	µg/g	1000	540			0,34–0,83		46.08	17,36–247,2	1,2 ± 0,2	8.9
528	Gujar, G, T,, Nair, R,, Singh, B, P,, Kumari, A,, & Kalia, V,	2008	Crop Protection, 27(3GÇô5): 537-544	Toxicity to the cotton bollworm, Helicoverpa armigera, of some Cry1Ac toxins expressed in cotton in India	y	India	Lepidoptera	Noctuidae	Helicoverpa	Helicoverpa armigera	F1	neonates	incorporation	96 h		a series	3 - 5	30 - 50	> 180 per each bioassay	probit analysis	Jalna	LC50	LC50	Cry1Ac (grounded seeds)	Cry1Ac	1.04	µg/g	1000	1040			0,70–1,7		59.73	18,91–534,7	1,3 ± 0,2	4.3
528	Gujar, G, T,, Nair, R,, Singh, B, P,, Kumari, A,, & Kalia, V,	2008	Crop Protection, 27(3GÇô5): 537-544	Toxicity to the cotton bollworm, Helicoverpa armigera, of some Cry1Ac toxins expressed in cotton in India	y	India	Lepidoptera	Noctuidae	Helicoverpa	Helicoverpa armigera	F1	neonates	incorporation	96 h		a series	3 - 5	30 - 50	> 180 per each bioassay	probit analysis	Khandwa	LC50	LC50	Cry1Ac (grounded seeds)	Cry1Ac	0.36	µg/g	1000	360			0,21–0,58		57.16	15,22–835,87	1,1 ± 0,2	0.8
528	Gujar, G, T,, Nair, R,, Singh, B, P,, Kumari, A,, & Kalia, V,	2008	Crop Protection, 27(3GÇô5): 537-544	Toxicity to the cotton bollworm, Helicoverpa armigera, of some Cry1Ac toxins expressed in cotton in India	y	India	Lepidoptera	Noctuidae	Helicoverpa	Helicoverpa armigera	F1	neonates	incorporation	96 h		a series	3 - 5	30 - 50	> 180 per each bioassay	probit analysis	Raichur	LC50	LC50	Cry1Ac (grounded seeds)	Cry1Ac	1.62	µg/g	1000	1620			1,08–2,96		82.22	23,85–1005,30	1,4 ± 0,2	3.9
528	Gujar, G, T,, Nair, R,, Singh, B, P,, Kumari, A,, & Kalia, V,	2008	Crop Protection, 27(3GÇô5): 537-544	Toxicity to the cotton bollworm, Helicoverpa armigera, of some Cry1Ac toxins expressed in cotton in India	y	India	Lepidoptera	Noctuidae	Helicoverpa	Helicoverpa armigera	F1	neonates	incorporation	96 h		a series	3 - 5	30 - 50	> 180 per each bioassay	probit analysis	Hisar	LC50	LC50	Cry1Ac (grounded seeds)	Cry1Ac	0.92	µg/g	1000	920			0,49–2,39		–	–	0,8 ± 0,2	0.2
528	Gujar, G, T,, Nair, R,, Singh, B, P,, Kumari, A,, & Kalia, V,	2008	Crop Protection, 27(3GÇô5): 537-544	Toxicity to the cotton bollworm, Helicoverpa armigera, of some Cry1Ac toxins expressed in cotton in India	y	India	Lepidoptera	Noctuidae	Helicoverpa	Helicoverpa armigera	F1	neonates	incorporation	96 h		a series	3 - 5	30 - 50	> 180 per each bioassay	probit analysis	Sirsa	LC50	LC50	Cry1Ac (grounded seeds)	Cry1Ac	1.08	µg/g	1000	1080			0,76–1,64		33.27	13,03–186,81	1,6 ± 0,2	7.3
528	Gujar, G, T,, Nair, R,, Singh, B, P,, Kumari, A,, & Kalia, V,	2008	Crop Protection, 27(3GÇô5): 537-544	Toxicity to the cotton bollworm, Helicoverpa armigera, of some Cry1Ac toxins expressed in cotton in India	y	India	Lepidoptera	Noctuidae	Helicoverpa	Helicoverpa armigera	F1	neonates	incorporation	96 h		a series	3 - 5	30 - 50	> 180 per each bioassay	probit analysis	Nagpur	LC50	LC50	Cry1Ac (grounded seeds)	Cry1Ac	1	µg/g	1000	1000			0,67–1,57		34.57	12,33–291,80	1,5 ± 0,3	3.2
528	Gujar, G, T,, Nair, R,, Singh, B, P,, Kumari, A,, & Kalia, V,	2008	Crop Protection, 27(3GÇô5): 537-544	Toxicity to the cotton bollworm, Helicoverpa armigera, of some Cry1Ac toxins expressed in cotton in India	y	India	Lepidoptera	Noctuidae	Helicoverpa	Helicoverpa armigera	F1	neonates	incorporation	96 h		a series	3 - 5	30 - 50	> 180 per each bioassay	probit analysis	Rajkot	LC50	LC50	Cry1Ac (grounded seeds)	Cry1Ac	0.076	µg/g	1000	76			0,04–0,12		1.97	0,92–9,81	1,6 ± 0,3	2.4
528	Gujar, G, T,, Nair, R,, Singh, B, P,, Kumari, A,, & Kalia, V,	2008	Crop Protection, 27(3GÇô5): 537-544	Toxicity to the cotton bollworm, Helicoverpa armigera, of some Cry1Ac toxins expressed in cotton in India	y	India	Lepidoptera	Noctuidae	Helicoverpa	Helicoverpa armigera	F1	neonates	incorporation	96 h		a series	3 - 5	30 - 50	> 180 per each bioassay	probit analysis	Indore	LC50	LC50	MVP Cry1Ac (encapsulated in killed Pseudomonas fluorescens)	Cry1Ac	0.147	µg/g	1000	147			0,094–0,231	LC99 μg/g	4.92	1,91–30,19	1,53 ± 0,3	4.3
528	Gujar, G, T,, Nair, R,, Singh, B, P,, Kumari, A,, & Kalia, V,	2008	Crop Protection, 27(3GÇô5): 537-544	Toxicity to the cotton bollworm, Helicoverpa armigera, of some Cry1Ac toxins expressed in cotton in India	y	India	Lepidoptera	Noctuidae	Helicoverpa	Helicoverpa armigera	F1	neonates	incorporation	96 h		a series	3 - 5	30 - 50	> 180 per each bioassay	probit analysis	Coimbatore	LC50	LC50	MVP Cry1Ac (encapsulated in killed Pseudomonas fluorescens)	Cry1Ac	0.31	µg/g	1000	310			0,177–0,681	LC99 μg/g	172.436	28,75–4641,65	0,85 ± 0,1	8.8
528	Gujar, G, T,, Nair, R,, Singh, B, P,, Kumari, A,, & Kalia, V,	2008	Crop Protection, 27(3GÇô5): 537-544	Toxicity to the cotton bollworm, Helicoverpa armigera, of some Cry1Ac toxins expressed in cotton in India	y	India	Lepidoptera	Noctuidae	Helicoverpa	Helicoverpa armigera	F1	neonates	incorporation	96 h		a series	3 - 5	30 - 50	> 180 per each bioassay	probit analysis	Nanded	LC50	LC50	MVP Cry1Ac (encapsulated in killed Pseudomonas fluorescens)	Cry1Ac	0.278	µg/g	1000	278			0,16–0,44	LC99 μg/g	56.47	20,27–290,23	1,01 ± 0,1	1.4
528	Gujar, G, T,, Nair, R,, Singh, B, P,, Kumari, A,, & Kalia, V,	2008	Crop Protection, 27(3GÇô5): 537-544	Toxicity to the cotton bollworm, Helicoverpa armigera, of some Cry1Ac toxins expressed in cotton in India	y	India	Lepidoptera	Noctuidae	Helicoverpa	Helicoverpa armigera	F1	neonates	incorporation	96 h		a series	3 - 5	30 - 50	> 180 per each bioassay	probit analysis	Satna	LC50	LC50	MVP Cry1Ac (encapsulated in killed Pseudomonas fluorescens)	Cry1Ac	0.096	µg/g	1000	96			0,052–0,79	LC99 μg/g	17.22	5,34–150,58	1,03 ± 0,2	3.1
528	Gujar, G, T,, Nair, R,, Singh, B, P,, Kumari, A,, & Kalia, V,	2008	Crop Protection, 27(3GÇô5): 537-544	Toxicity to the cotton bollworm, Helicoverpa armigera, of some Cry1Ac toxins expressed in cotton in India	y	India	Lepidoptera	Noctuidae	Helicoverpa	Helicoverpa armigera	F1	neonates	incorporation	96 h		a series	3 - 5	30 - 50	> 180 per each bioassay	probit analysis	Rahuri	LC50	LC50	MVP Cry1Ac (encapsulated in killed Pseudomonas fluorescens)	Cry1Ac	0.511	µg/g	1000	511			0,28–0,80	LC99 μg/g	71.87	24,80–501,36	1,08 ± 0,2	10.2
528	Gujar, G, T,, Nair, R,, Singh, B, P,, Kumari, A,, & Kalia, V,	2008	Crop Protection, 27(3GÇô5): 537-544	Toxicity to the cotton bollworm, Helicoverpa armigera, of some Cry1Ac toxins expressed in cotton in India	y	India	Lepidoptera	Noctuidae	Helicoverpa	Helicoverpa armigera	F1	neonates	incorporation	96 h		a series	3 - 5	30 - 50	> 180 per each bioassay	probit analysis	IARI (New Delhi)	LC50	LC50	MVP Cry1Ac (encapsulated in killed Pseudomonas fluorescens)	Cry1Ac	0.44	µg/g	1000	440			0,303–0,62	LC99 μg/g	12.04	5,95–37,40	1,62 ± 0,2	5.1
528	Gujar, G, T,, Nair, R,, Singh, B, P,, Kumari, A,, & Kalia, V,	2008	Crop Protection, 27(3GÇô5): 537-544	Toxicity to the cotton bollworm, Helicoverpa armigera, of some Cry1Ac toxins expressed in cotton in India	y	India	Lepidoptera	Noctuidae	Helicoverpa	Helicoverpa armigera	F1	neonates	incorporation	96 h		a series	3 - 5	30 - 50	> 180 per each bioassay	probit analysis	Ludhiana	LC50	LC50	MVP Cry1Ac (encapsulated in killed Pseudomonas fluorescens)	Cry1Ac	0.562	µg/g	1000	562			0,38–0,86	LC99 μg/g	31.73	11,98–149,44	1,33 ± 0,7	4.5
528	Gujar, G, T,, Nair, R,, Singh, B, P,, Kumari, A,, & Kalia, V,	2008	Crop Protection, 27(3GÇô5): 537-544	Toxicity to the cotton bollworm, Helicoverpa armigera, of some Cry1Ac toxins expressed in cotton in India	y	India	Lepidoptera	Noctuidae	Helicoverpa	Helicoverpa armigera	F1	neonates	incorporation	96 h		a series	3 - 5	30 - 50	> 180 per each bioassay	probit analysis	Hisar	LC50	LC50	MVP Cry1Ac (encapsulated in killed Pseudomonas fluorescens)	Cry1Ac	0.451	µg/g	1000	451			0,277–0,811	LC99 μg/g	128.89	28,65–2083	0,95 ± 0,2	3.9
528	Gujar, G, T,, Nair, R,, Singh, B, P,, Kumari, A,, & Kalia, V,	2008	Crop Protection, 27(3GÇô5): 537-544	Toxicity to the cotton bollworm, Helicoverpa armigera, of some Cry1Ac toxins expressed in cotton in India	y	India	Lepidoptera	Noctuidae	Helicoverpa	Helicoverpa armigera	F1	neonates	incorporation	96 h		a series	3 - 5	30 - 50	> 180 per each bioassay	probit analysis	Faridkot	LC50	LC50	MVP Cry1Ac (encapsulated in killed Pseudomonas fluorescens)	Cry1Ac	0.261	µg/g	1000	261			0,179–0,408	LC99 μg/g	11.56	4,63–49,52	1,41 ± 0,2	14
528	Gujar, G, T,, Nair, R,, Singh, B, P,, Kumari, A,, & Kalia, V,	2008	Crop Protection, 27(3GÇô5): 537-544	Toxicity to the cotton bollworm, Helicoverpa armigera, of some Cry1Ac toxins expressed in cotton in India	y	India	Lepidoptera	Noctuidae	Helicoverpa	Helicoverpa armigera	F1	neonates	incorporation	96 h		a series	3 - 5	30 - 50	> 180 per each bioassay	probit analysis	Punchkula	LC50	LC50	MVP Cry1Ac (encapsulated in killed Pseudomonas fluorescens)	Cry1Ac	0.573	µg/g	1000	573			0,262–2,616	LC99 μg/g	–	–	0,87 ± 0,2	7.2
528	Gujar, G, T,, Nair, R,, Singh, B, P,, Kumari, A,, & Kalia, V,	2008	Crop Protection, 27(3GÇô5): 537-544	Toxicity to the cotton bollworm, Helicoverpa armigera, of some Cry1Ac toxins expressed in cotton in India	y	India	Lepidoptera	Noctuidae	Helicoverpa	Helicoverpa armigera	F1	neonates	incorporation	96 h		a series	3 - 5	30 - 50	> 180 per each bioassay	probit analysis	Vadodara	LC50	LC50	MVP Cry1Ac (encapsulated in killed Pseudomonas fluorescens)	Cry1Ac	0.149	µg/g	1000	149			0,08–0,67	LC99 μg/g	113.79	22,46–2381,3	0,80 ± 0,1	15.9
528	Gujar, G, T,, Nair, R,, Singh, B, P,, Kumari, A,, & Kalia, V,	2008	Crop Protection, 27(3GÇô5): 537-544	Toxicity to the cotton bollworm, Helicoverpa armigera, of some Cry1Ac toxins expressed in cotton in India	y	India	Lepidoptera	Noctuidae	Helicoverpa	Helicoverpa armigera	F1	neonates	incorporation	96 h		a series	3 - 5	30 - 50	> 180 per each bioassay	probit analysis	Hyderabad	LC50	LC50	MVP Cry1Ac (encapsulated in killed Pseudomonas fluorescens)	Cry1Ac	0.822	µg/g	1000	822			0,308–4,55	LC99 μg/g	–	–	0,51 ± 0,1	5.7
528	Gujar, G, T,, Nair, R,, Singh, B, P,, Kumari, A,, & Kalia, V,	2008	Crop Protection, 27(3GÇô5): 537-544	Toxicity to the cotton bollworm, Helicoverpa armigera, of some Cry1Ac toxins expressed in cotton in India	y	India	Lepidoptera	Noctuidae	Helicoverpa	Helicoverpa armigera	F1	neonates	incorporation	96 h		a series	3 - 5	30 - 50	> 180 per each bioassay	probit analysis	Basurgaddy	LC50	LC50	MVP Cry1Ac (encapsulated in killed Pseudomonas fluorescens)	Cry1Ac	0.018	µg/g	1000	18			0,010–0,038	LC99 μg/g	6.51	2,15–37,18	0,91 ± 0,1	7.1
528	Gujar, G, T,, Nair, R,, Singh, B, P,, Kumari, A,, & Kalia, V,	2008	Crop Protection, 27(3GÇô5): 537-544	Toxicity to the cotton bollworm, Helicoverpa armigera, of some Cry1Ac toxins expressed in cotton in India	y	India	Lepidoptera	Noctuidae	Helicoverpa	Helicoverpa armigera	F1	neonates	incorporation	96 h		a series	3 - 5	30 - 50	> 180 per each bioassay	probit analysis	Katni	LC50	LC50	MVP Cry1Ac (encapsulated in killed Pseudomonas fluorescens)	Cry1Ac	0.022	µg/g	1000	22			0,004–0,53	LC99 μg/g	79.55	11,07–8140,17	0,91 ± 0,1	0.5
528	Gujar, G, T,, Nair, R,, Singh, B, P,, Kumari, A,, & Kalia, V,	2008	Crop Protection, 27(3GÇô5): 537-544	Toxicity to the cotton bollworm, Helicoverpa armigera, of some Cry1Ac toxins expressed in cotton in India	y	India	Lepidoptera	Noctuidae	Helicoverpa	Helicoverpa armigera	F1	neonates	incorporation	96 h		a series	3 - 5	30 - 50	> 180 per each bioassay	probit analysis	Jalna	LC50	LC50	MVP Cry1Ac (encapsulated in killed Pseudomonas fluorescens)	Cry1Ac	0.72	µg/g	1000	720			0,347–2,13	LC99 μg/g	–	–	0,65 ± 0,1	0.6
528	Gujar, G, T,, Nair, R,, Singh, B, P,, Kumari, A,, & Kalia, V,	2008	Crop Protection, 27(3GÇô5): 537-544	Toxicity to the cotton bollworm, Helicoverpa armigera, of some Cry1Ac toxins expressed in cotton in India	y	India	Lepidoptera	Noctuidae	Helicoverpa	Helicoverpa armigera	F1	neonates	incorporation	96 h		a series	3 - 5	30 - 50	> 180 per each bioassay	probit analysis	Khandwa	LC50	LC50	MVP Cry1Ac (encapsulated in killed Pseudomonas fluorescens)	Cry1Ac	0.224	µg/g	1000	224			0,125–0,40	LC99 μg/g	142.81	28,79–2809,18	0,83 ± 0,1	2.9
528	Gujar, G, T,, Nair, R,, Singh, B, P,, Kumari, A,, & Kalia, V,	2008	Crop Protection, 27(3GÇô5): 537-544	Toxicity to the cotton bollworm, Helicoverpa armigera, of some Cry1Ac toxins expressed in cotton in India	y	India	Lepidoptera	Noctuidae	Helicoverpa	Helicoverpa armigera	F1	neonates	incorporation	96 h		a series	3 - 5	30 - 50	> 180 per each bioassay	probit analysis	Raichur	LC50	LC50	MVP Cry1Ac (encapsulated in killed Pseudomonas fluorescens)	Cry1Ac	0.293	µg/g	1000	293			0,19–0,45	LC99 μg/g	25.64	9,49–129,21	1,19 ± 0,1	1.7
528	Gujar, G, T,, Nair, R,, Singh, B, P,, Kumari, A,, & Kalia, V,	2008	Crop Protection, 27(3GÇô5): 537-544	Toxicity to the cotton bollworm, Helicoverpa armigera, of some Cry1Ac toxins expressed in cotton in India	y	India	Lepidoptera	Noctuidae	Helicoverpa	Helicoverpa armigera	F1	neonates	incorporation	96 h		a series	3 - 5	30 - 50	> 180 per each bioassay	probit analysis	Hisar	LC50	LC50	MVP Cry1Ac (encapsulated in killed Pseudomonas fluorescens)	Cry1Ac	0.021	µg/g	1000	21			0,01–0,04	LC99 μg/g	7.23	2,41–40,15	0,92 ± 0,1	2.1
528	Gujar, G, T,, Nair, R,, Singh, B, P,, Kumari, A,, & Kalia, V,	2008	Crop Protection, 27(3GÇô5): 537-544	Toxicity to the cotton bollworm, Helicoverpa armigera, of some Cry1Ac toxins expressed in cotton in India	y	India	Lepidoptera	Noctuidae	Helicoverpa	Helicoverpa armigera	F1	neonates	incorporation	96 h		a series	3 - 5	30 - 50	> 180 per each bioassay	probit analysis	Sirsa	LC50	LC50	MVP Cry1Ac (encapsulated in killed Pseudomonas fluorescens)	Cry1Ac	0.064	µg/g	1000	64			0,041–0,09	LC99 μg/g	3.15	1,41–11,60	1,37 ± 0,2	8.8
528	Gujar, G, T,, Nair, R,, Singh, B, P,, Kumari, A,, & Kalia, V,	2008	Crop Protection, 27(3GÇô5): 537-544	Toxicity to the cotton bollworm, Helicoverpa armigera, of some Cry1Ac toxins expressed in cotton in India	y	India	Lepidoptera	Noctuidae	Helicoverpa	Helicoverpa armigera	F1	neonates	incorporation	96 h		a series	3 - 5	30 - 50	> 180 per each bioassay	probit analysis	Nagpur	LC50	LC50	MVP Cry1Ac (encapsulated in killed Pseudomonas fluorescens)	Cry1Ac	0.694	µg/g	1000	694			0,397–1,10	LC99 μg/g	15.47	5,68–214,06	1,73 ± 0,4	1.7
528	Gujar, G, T,, Nair, R,, Singh, B, P,, Kumari, A,, & Kalia, V,	2008	Crop Protection, 27(3GÇô5): 537-544	Toxicity to the cotton bollworm, Helicoverpa armigera, of some Cry1Ac toxins expressed in cotton in India	y	India	Lepidoptera	Noctuidae	Helicoverpa	Helicoverpa armigera	F1	neonates	incorporation	96 h		a series	3 - 5	30 - 50	> 180 per each bioassay	probit analysis	Rajkot	LC50	LC50	MVP Cry1Ac (encapsulated in killed Pseudomonas fluorescens)	Cry1Ac	0.0085	µg/g	1000	8.5			0,007–0,01	LC99 μg/g	0.027	0,017–0,12	4,66 ± 1,3	0.01
2062	Huang, F, N,, Leonard, B, R,, & Gable, R, H,	2006	Journal of Economic Entomology, 99(1): 194-202	Comparative susceptibility of European corn borer, southwestern corn borer, and sugarcane borer (Lepidoptera : Crambidae) to Cry1Ab protein in a commercial Bacillus thuringiensis corn hybrid	y	USA	Lepidoptera	Crambidae	Ostrinia	Ostrinia nubilalis	field strain F1	neonates	incorporation	7 d		6	4 - 8	17 - 32	246	probit analysis		LC50	LC50	Cry1Ab	Cry1Ab	0.028	mg/kg	1000	28			0,021 - 0,033	LC90 (mg/kg)	0.06	0,05 - 0,08	3,91 ± 0,71	14.72
425	Jalali, S, K,, Mohan, K, S,, Singh, S, P,, Manjunath, T, M,, & Lalitha, Y,	2004	Crop Protection, 23(1): 53-59	Baseline-susceptibility of the old-world bollworm, Helicoverpa armigera (Hübner) (Lepidoptera: Noctuidae) populations from India to Bacillus thuringiensis Cry1Ac insecticidal protein	y	India	Lepidoptera	Noctuidae	Helicoverpa	Helicoverpa armigera	F1	neonates	incorporation	7 d		7	5	32	1120 per population	probit analysis	Bathinda1999	LC50	LC50	Cry1Ac, MVP-II protoxin	Cry1Ac	0.14	µg/ml	1000	140			0,09 - 0,21	LC90 (µg/ml)	1.27	0,70 - 3,21	2,41 ± 0,31	61.03		x	y	n	Y	y	y	y	y
425	Jalali, S, K,, Mohan, K, S,, Singh, S, P,, Manjunath, T, M,, & Lalitha, Y,	2004	Crop Protection, 23(1): 53-59	Baseline-susceptibility of the old-world bollworm, Helicoverpa armigera (Hübner) (Lepidoptera: Noctuidae) populations from India to Bacillus thuringiensis Cry1Ac insecticidal protein	y	India	Lepidoptera	Noctuidae	Helicoverpa	Helicoverpa armigera	F1	neonates	incorporation	7 d		7	5	32	1120 per population	probit analysis	Sirsa 1999	LC50	LC50	Cry1Ac, MVP-II protoxin	Cry1Ac	0.49	µg/ml	1000	490			0,32 - 0,78		5.57	2,83 - 16,22	2,11 ± 0,27	59.78
425	Jalali, S, K,, Mohan, K, S,, Singh, S, P,, Manjunath, T, M,, & Lalitha, Y,	2004	Crop Protection, 23(1): 53-59	Baseline-susceptibility of the old-world bollworm, Helicoverpa armigera (Hübner) (Lepidoptera: Noctuidae) populations from India to Bacillus thuringiensis Cry1Ac insecticidal protein	y	India	Lepidoptera	Noctuidae	Helicoverpa	Helicoverpa armigera	F1	neonates	incorporation	7 d		7	5	32	1120 per population	probit analysis	Sriganganagar 1999	LC50	LC50	Cry1Ac, MVP-II protoxin	Cry1Ac	0.61	µg/ml	1000	610			0,41 - 0,93		4.52	2,55 - 11,10	2,58 ± 0,35	55.08
425	Jalali, S, K,, Mohan, K, S,, Singh, S, P,, Manjunath, T, M,, & Lalitha, Y,	2004	Crop Protection, 23(1): 53-59	Baseline-susceptibility of the old-world bollworm, Helicoverpa armigera (Hübner) (Lepidoptera: Noctuidae) populations from India to Bacillus thuringiensis Cry1Ac insecticidal protein	y	India	Lepidoptera	Noctuidae	Helicoverpa	Helicoverpa armigera	F1	neonates	incorporation	7 d		7	5	32	1120 per population	probit analysis	Khandwa 1999	LC50	LC50	Cry1Ac, MVP-II protoxin	Cry1Ac	0.32	µg/ml	1000	320			0,21 - 0,48		2.32	1,33 - 5,43	2,57 ± 0,34	58.67
425	Jalali, S, K,, Mohan, K, S,, Singh, S, P,, Manjunath, T, M,, & Lalitha, Y,	2004	Crop Protection, 23(1): 53-59	Baseline-susceptibility of the old-world bollworm, Helicoverpa armigera (Hübner) (Lepidoptera: Noctuidae) populations from India to Bacillus thuringiensis Cry1Ac insecticidal protein	y	India	Lepidoptera	Noctuidae	Helicoverpa	Helicoverpa armigera	F1	neonates	incorporation	7 d		7	5	32	1120 per population	probit analysis	Anand 1999	LC50	LC50	Cry1Ac, MVP-II protoxin	Cry1Ac	0.58	µg/ml	1000	580			0,38 - 0,93		5.7	2,84 - 15,91	2,16 ± 0,28	59.12
425	Jalali, S, K,, Mohan, K, S,, Singh, S, P,, Manjunath, T, M,, & Lalitha, Y,	2004	Crop Protection, 23(1): 53-59	Baseline-susceptibility of the old-world bollworm, Helicoverpa armigera (Hübner) (Lepidoptera: Noctuidae) populations from India to Bacillus thuringiensis Cry1Ac insecticidal protein	y	India	Lepidoptera	Noctuidae	Helicoverpa	Helicoverpa armigera	F1	neonates	incorporation	7 d		7	5	32	1120 per population	probit analysis	Akola 1999	LC50	LC50	Cry1Ac, MVP-II protoxin	Cry1Ac	0.28	µg/ml	1000	280			0,18 - 0,43		2.87	1,51 - 7,76	2,20 ± 0,28	61.11
425	Jalali, S, K,, Mohan, K, S,, Singh, S, P,, Manjunath, T, M,, & Lalitha, Y,	2004	Crop Protection, 23(1): 53-59	Baseline-susceptibility of the old-world bollworm, Helicoverpa armigera (Hübner) (Lepidoptera: Noctuidae) populations from India to Bacillus thuringiensis Cry1Ac insecticidal protein	y	India	Lepidoptera	Noctuidae	Helicoverpa	Helicoverpa armigera	F1	neonates	incorporation	7 d		7	5	32	1120 per population	probit analysis	Khammam 1999	LC50	LC50	Cry1Ac, MVP-II protoxin	Cry1Ac	0.71	µg/ml	1000	710			0,46 - 1,11		6.94	3,59 - 19,96	2,32 ± 0,32	55.61
425	Jalali, S, K,, Mohan, K, S,, Singh, S, P,, Manjunath, T, M,, & Lalitha, Y,	2004	Crop Protection, 23(1): 53-59	Baseline-susceptibility of the old-world bollworm, Helicoverpa armigera (Hübner) (Lepidoptera: Noctuidae) populations from India to Bacillus thuringiensis Cry1Ac insecticidal protein	y	India	Lepidoptera	Noctuidae	Helicoverpa	Helicoverpa armigera	F1	neonates	incorporation	7 d		7	5	32	1120 per population	probit analysis	Guntur 1999	LC50	LC50	Cry1Ac, MVP-II protoxin	Cry1Ac	0.3	µg/ml	1000	300			0,19 - 0,50		5.25	2,42 - 18,11	2,07 ± 0,27	60.71
425	Jalali, S, K,, Mohan, K, S,, Singh, S, P,, Manjunath, T, M,, & Lalitha, Y,	2004	Crop Protection, 23(1): 53-59	Baseline-susceptibility of the old-world bollworm, Helicoverpa armigera (Hübner) (Lepidoptera: Noctuidae) populations from India to Bacillus thuringiensis Cry1Ac insecticidal protein	y	India	Lepidoptera	Noctuidae	Helicoverpa	Helicoverpa armigera	F1	neonates	incorporation	7 d		7	5	32	1120 per population	probit analysis	Raichur 1999	LC50	LC50	Cry1Ac, MVP-II protoxin	Cry1Ac	0.71	µg/ml	1000	710			0,48 - 1,06		4.71	2,70 - 11,41	2,76 ± 0,39	52.45
425	Jalali, S, K,, Mohan, K, S,, Singh, S, P,, Manjunath, T, M,, & Lalitha, Y,	2004	Crop Protection, 23(1): 53-59	Baseline-susceptibility of the old-world bollworm, Helicoverpa armigera (Hübner) (Lepidoptera: Noctuidae) populations from India to Bacillus thuringiensis Cry1Ac insecticidal protein	y	India	Lepidoptera	Noctuidae	Helicoverpa	Helicoverpa armigera	F1	neonates	incorporation	7 d		7	5	32	1120 per population	probit analysis	Coimbatore1999	LC50	LC50	Cry1Ac, MVP-II protoxin	Cry1Ac	0.19	µg/ml	1000	190			0,13 - 0,27		1.17	0,69 - 2,60	3,01 ± 0,42	55.61
425	Jalali, S, K,, Mohan, K, S,, Singh, S, P,, Manjunath, T, M,, & Lalitha, Y,	2004	Crop Protection, 23(1): 53-59	Baseline-susceptibility of the old-world bollworm, Helicoverpa armigera (Hübner) (Lepidoptera: Noctuidae) populations from India to Bacillus thuringiensis Cry1Ac insecticidal protein	y	India	Lepidoptera	Noctuidae	Helicoverpa	Helicoverpa armigera	F1	neonates	incorporation	7 d		7	5	32	1120 per population	probit analysis	Barwah 2001	LC50	LC50	Cry1Ac, MVP-II protoxin	Cry1Ac	0.19	µg/ml	1000	190			0,12 - 0,28		1.47	0,83 - 3,53	2,52 ± 0,328	59.68
425	Jalali, S, K,, Mohan, K, S,, Singh, S, P,, Manjunath, T, M,, & Lalitha, Y,	2004	Crop Protection, 23(1): 53-59	Baseline-susceptibility of the old-world bollworm, Helicoverpa armigera (Hübner) (Lepidoptera: Noctuidae) populations from India to Bacillus thuringiensis Cry1Ac insecticidal protein	y	India	Lepidoptera	Noctuidae	Helicoverpa	Helicoverpa armigera	F1	neonates	incorporation	7 d		7	5	32	1120 per population	probit analysis	Khandwa 2001	LC50	LC50	Cry1Ac, MVP-II protoxin	Cry1Ac	0.26	µg/ml	1000	260			0,17 - 0,39		2.07	1,15 - 4,93	2,46 ± 0,322	60.17
425	Jalali, S, K,, Mohan, K, S,, Singh, S, P,, Manjunath, T, M,, & Lalitha, Y,	2004	Crop Protection, 23(1): 53-59	Baseline-susceptibility of the old-world bollworm, Helicoverpa armigera (Hübner) (Lepidoptera: Noctuidae) populations from India to Bacillus thuringiensis Cry1Ac insecticidal protein	y	India	Lepidoptera	Noctuidae	Helicoverpa	Helicoverpa armigera	F1	neonates	incorporation	7 d		7	5	32	1120 per population	probit analysis	Rajkot 2001	LC50	LC50	Cry1Ac, MVP-II protoxin	Cry1Ac	0.61	µg/ml	1000	610			0,04 - 0,95		5.58	2,96 - 15,43	1,76 ± 0,306	56.84
425	Jalali, S, K,, Mohan, K, S,, Singh, S, P,, Manjunath, T, M,, & Lalitha, Y,	2004	Crop Protection, 23(1): 53-59	Baseline-susceptibility of the old-world bollworm, Helicoverpa armigera (Hübner) (Lepidoptera: Noctuidae) populations from India to Bacillus thuringiensis Cry1Ac insecticidal protein	y	India	Lepidoptera	Noctuidae	Helicoverpa	Helicoverpa armigera	F1	neonates	incorporation	7 d		7	5	32	1120 per population	probit analysis	Vadodra 2001	LC50	LC50	Cry1Ac, MVP-II protoxin	Cry1Ac	0.2	µg/ml	1000	200			0,13 - 0,30		1.43	0,83 - 3,30	2,64 ± 0,346	58.74
425	Jalali, S, K,, Mohan, K, S,, Singh, S, P,, Manjunath, T, M,, & Lalitha, Y,	2004	Crop Protection, 23(1): 53-59	Baseline-susceptibility of the old-world bollworm, Helicoverpa armigera (Hübner) (Lepidoptera: Noctuidae) populations from India to Bacillus thuringiensis Cry1Ac insecticidal protein	y	India	Lepidoptera	Noctuidae	Helicoverpa	Helicoverpa armigera	F1	neonates	incorporation	7 d		7	5	32	1120 per population	probit analysis	Jalgoan 2001	LC50	LC50	Cry1Ac, MVP-II protoxin	Cry1Ac	0.4	µg/ml	1000	400			0,26 - 0,65		6.7	3,04 - 24,21	1,96 ± 0,258	59.16
425	Jalali, S, K,, Mohan, K, S,, Singh, S, P,, Manjunath, T, M,, & Lalitha, Y,	2004	Crop Protection, 23(1): 53-59	Baseline-susceptibility of the old-world bollworm, Helicoverpa armigera (Hübner) (Lepidoptera: Noctuidae) populations from India to Bacillus thuringiensis Cry1Ac insecticidal protein	y	India	Lepidoptera	Noctuidae	Helicoverpa	Helicoverpa armigera	F1	neonates	incorporation	7 d		7	5	32	1120 per population	probit analysis	Jalna 2001	LC50	LC50	Cry1Ac, MVP-II protoxin	Cry1Ac	0.31	µg/ml	1000	310			0,21 - 0,46		1.92	1,14 - 4,26	2,75 ± 0,366	56.93
425	Jalali, S, K,, Mohan, K, S,, Singh, S, P,, Manjunath, T, M,, & Lalitha, Y,	2004	Crop Protection, 23(1): 53-59	Baseline-susceptibility of the old-world bollworm, Helicoverpa armigera (Hübner) (Lepidoptera: Noctuidae) populations from India to Bacillus thuringiensis Cry1Ac insecticidal protein	y	India	Lepidoptera	Noctuidae	Helicoverpa	Helicoverpa armigera	F1	neonates	incorporation	7 d		7	5	32	1120 per population	probit analysis	Yavatmal 2001	LC50	LC50	Cry1Ac, MVP-II protoxin	Cry1Ac	0.22	µg/ml	1000	220			0,15 - 0,32		1.57	0,90 - 3,69	2,77 ± 0,376	56.96
425	Jalali, S, K,, Mohan, K, S,, Singh, S, P,, Manjunath, T, M,, & Lalitha, Y,	2004	Crop Protection, 23(1): 53-59	Baseline-susceptibility of the old-world bollworm, Helicoverpa armigera (Hübner) (Lepidoptera: Noctuidae) populations from India to Bacillus thuringiensis Cry1Ac insecticidal protein	y	India	Lepidoptera	Noctuidae	Helicoverpa	Helicoverpa armigera	F1	neonates	incorporation	7 d		7	5	32	1120 per population	probit analysis	Adilabad 2001	LC50	LC50	Cry1Ac, MVP-II protoxin	Cry1Ac	0.15	µg/ml	1000	150			0,09 - 0,23		1.47	0,80 - 3,67	2,30 ± 0,290	63.31
425	Jalali, S, K,, Mohan, K, S,, Singh, S, P,, Manjunath, T, M,, & Lalitha, Y,	2004	Crop Protection, 23(1): 53-59	Baseline-susceptibility of the old-world bollworm, Helicoverpa armigera (Hübner) (Lepidoptera: Noctuidae) populations from India to Bacillus thuringiensis Cry1Ac insecticidal protein	y	India	Lepidoptera	Noctuidae	Helicoverpa	Helicoverpa armigera	F1	neonates	incorporation	7 d		7	5	32	1120 per population	probit analysis	Warangal 2001	LC50	LC50	Cry1Ac, MVP-II protoxin	Cry1Ac	0.2	µg/ml	1000	200			0,13 - 0,31		1.95	1,06 - 5,01	2,55 ± 0,344	59.38
425	Jalali, S, K,, Mohan, K, S,, Singh, S, P,, Manjunath, T, M,, & Lalitha, Y,	2004	Crop Protection, 23(1): 53-59	Baseline-susceptibility of the old-world bollworm, Helicoverpa armigera (Hübner) (Lepidoptera: Noctuidae) populations from India to Bacillus thuringiensis Cry1Ac insecticidal protein	y	India	Lepidoptera	Noctuidae	Helicoverpa	Helicoverpa armigera	F1	neonates	incorporation	7 d		7	5	32	1120 per population	probit analysis	Guntur 2001	LC50	LC50	Cry1Ac, MVP-II protoxin	Cry1Ac	0.21	µg/ml	1000	210			0,14 - 0,31		1.44	0,84 - 3,29	2,27 ± 0,358	58.28
425	Jalali, S, K,, Mohan, K, S,, Singh, S, P,, Manjunath, T, M,, & Lalitha, Y,	2004	Crop Protection, 23(1): 53-59	Baseline-susceptibility of the old-world bollworm, Helicoverpa armigera (Hübner) (Lepidoptera: Noctuidae) populations from India to Bacillus thuringiensis Cry1Ac insecticidal protein	y	India	Lepidoptera	Noctuidae	Helicoverpa	Helicoverpa armigera	F1	neonates	incorporation	7 d		7	5	32	1120 per population	probit analysis	Ranebennur 2001	LC50	LC50	Cry1Ac, MVP-II protoxin	Cry1Ac	0.14	µg/ml	1000	140			0,10 - 0,21		1.02	0,59 - 2,29	2,58 ± 0,334	59.99
425	Jalali, S, K,, Mohan, K, S,, Singh, S, P,, Manjunath, T, M,, & Lalitha, Y,	2004	Crop Protection, 23(1): 53-59	Baseline-susceptibility of the old-world bollworm, Helicoverpa armigera (Hübner) (Lepidoptera: Noctuidae) populations from India to Bacillus thuringiensis Cry1Ac insecticidal protein	y	India	Lepidoptera	Noctuidae	Helicoverpa	Helicoverpa armigera	F1	neonates	incorporation	7 d		7	5	32	1120 per population	probit analysis	Davanagere 2001	LC50	LC50	Cry1Ac, MVP-II protoxin	Cry1Ac	0.11	µg/ml	1000	110			0,07 - 0,17		1.09	0,57 - 3,07	3,13 ± 0,460	54.27
425	Jalali, S, K,, Mohan, K, S,, Singh, S, P,, Manjunath, T, M,, & Lalitha, Y,	2004	Crop Protection, 23(1): 53-59	Baseline-susceptibility of the old-world bollworm, Helicoverpa armigera (Hübner) (Lepidoptera: Noctuidae) populations from India to Bacillus thuringiensis Cry1Ac insecticidal protein	y	India	Lepidoptera	Noctuidae	Helicoverpa	Helicoverpa armigera	F1	neonates	incorporation	7 d		7	5	32	1120 per population	probit analysis	Coimbatore 2001	LC50	LC50	Cry1Ac, MVP-II protoxin	Cry1Ac	0.16	µg/ml	1000	160			0,11 - 0,25		1.17	0,69 - 2,65	2,57 ± 0,330	60.75
425	Jalali, S, K,, Mohan, K, S,, Singh, S, P,, Manjunath, T, M,, & Lalitha, Y,	2004	Crop Protection, 23(1): 53-59	Baseline-susceptibility of the old-world bollworm, Helicoverpa armigera (Hübner) (Lepidoptera: Noctuidae) populations from India to Bacillus thuringiensis Cry1Ac insecticidal protein	y	India	Lepidoptera	Noctuidae	Helicoverpa	Helicoverpa armigera	F1	neonates	incorporation	7 d		7	5	32	1120 per population	probit analysis	Dindigul 2001	LC50	LC50	Cry1Ac, MVP-II protoxin	Cry1Ac	0.19	µg/ml	1000	190			0,12 - 0,31		2.61	1,33 - 7,32	1,97 ± 0,240	64.43
425	Jalali, S, K,, Mohan, K, S,, Singh, S, P,, Manjunath, T, M,, & Lalitha, Y,	2004	Crop Protection, 23(1): 53-59	Baseline-susceptibility of the old-world bollworm, Helicoverpa armigera (Hübner) (Lepidoptera: Noctuidae) populations from India to Bacillus thuringiensis Cry1Ac insecticidal protein	y	India	Lepidoptera	Noctuidae	Helicoverpa	Helicoverpa armigera	F1	neonates	incorporation	7 d		7	5	32	1120 per population	probit analysis	Bathinda 1999	MIC50	EC50	Cry1Ac, MVP-II protoxin	Cry1Ac	0.05	µg/ml	1000	50			0,03 - 0,07	MIC90	0.33	0,19 - 0,75	2,727 ± 0,37	55.42
425	Jalali, S, K,, Mohan, K, S,, Singh, S, P,, Manjunath, T, M,, & Lalitha, Y,	2004	Crop Protection, 23(1): 53-59	Baseline-susceptibility of the old-world bollworm, Helicoverpa armigera (Hübner) (Lepidoptera: Noctuidae) populations from India to Bacillus thuringiensis Cry1Ac insecticidal protein	y	India	Lepidoptera	Noctuidae	Helicoverpa	Helicoverpa armigera	F1	neonates	incorporation	7 d		7	5	32	1120 per population	probit analysis	Sirsa 1999	MIC50	EC50	Cry1Ac, MVP-II protoxin	Cry1Ac	0.18	µg/ml	1000	180			0,12 - 0,28		1.46	0,83 - 3,46	2,477 ± 0,32	59.43
425	Jalali, S, K,, Mohan, K, S,, Singh, S, P,, Manjunath, T, M,, & Lalitha, Y,	2004	Crop Protection, 23(1): 53-59	Baseline-susceptibility of the old-world bollworm, Helicoverpa armigera (Hübner) (Lepidoptera: Noctuidae) populations from India to Bacillus thuringiensis Cry1Ac insecticidal protein	y	India	Lepidoptera	Noctuidae	Helicoverpa	Helicoverpa armigera	F1	neonates	incorporation	7 d		7	5	32	1120 per population	probit analysis	Sriganganagar 1999	MIC50	EC50	Cry1Ac, MVP-II protoxin	Cry1Ac	0.2	µg/ml	1000	200			0,14 - 0,29		1.13	0,69 - 2,42	2,937 ± 0,39	55.75
425	Jalali, S, K,, Mohan, K, S,, Singh, S, P,, Manjunath, T, M,, & Lalitha, Y,	2004	Crop Protection, 23(1): 53-59	Baseline-susceptibility of the old-world bollworm, Helicoverpa armigera (Hübner) (Lepidoptera: Noctuidae) populations from India to Bacillus thuringiensis Cry1Ac insecticidal protein	y	India	Lepidoptera	Noctuidae	Helicoverpa	Helicoverpa armigera	F1	neonates	incorporation	7 d		7	5	32	1120 per population	probit analysis	Khandwa 1999	MIC50	EC50	Cry1Ac, MVP-II protoxin	Cry1Ac	0.15	µg/ml	1000	150			0,10 - 0,22		0.77	0,48 - 1,60	3,147 ± 0,43	53.23
425	Jalali, S, K,, Mohan, K, S,, Singh, S, P,, Manjunath, T, M,, & Lalitha, Y,	2004	Crop Protection, 23(1): 53-59	Baseline-susceptibility of the old-world bollworm, Helicoverpa armigera (Hübner) (Lepidoptera: Noctuidae) populations from India to Bacillus thuringiensis Cry1Ac insecticidal protein	y	India	Lepidoptera	Noctuidae	Helicoverpa	Helicoverpa armigera	F1	neonates	incorporation	7 d		7	5	32	1120 per population	probit analysis	Anand 1999	MIC50	EC50	Cry1Ac, MVP-II protoxin	Cry1Ac	0.19	µg/ml	1000	190			0,13 - 0,29		1.58	0,87 - 4,00	2,377 ± 0,31	59.55
425	Jalali, S, K,, Mohan, K, S,, Singh, S, P,, Manjunath, T, M,, & Lalitha, Y,	2004	Crop Protection, 23(1): 53-59	Baseline-susceptibility of the old-world bollworm, Helicoverpa armigera (Hübner) (Lepidoptera: Noctuidae) populations from India to Bacillus thuringiensis Cry1Ac insecticidal protein	y	India	Lepidoptera	Noctuidae	Helicoverpa	Helicoverpa armigera	F1	neonates	incorporation	7 d		7	5	32	1120 per population	probit analysis	Akola 1999	MIC50	EC50	Cry1Ac, MVP-II protoxin	Cry1Ac	0.12	µg/ml	1000	120			0,08 - 0,18		1.02	0,57 - 2,49	2,307 ± 0,30	60.74
425	Jalali, S, K,, Mohan, K, S,, Singh, S, P,, Manjunath, T, M,, & Lalitha, Y,	2004	Crop Protection, 23(1): 53-59	Baseline-susceptibility of the old-world bollworm, Helicoverpa armigera (Hübner) (Lepidoptera: Noctuidae) populations from India to Bacillus thuringiensis Cry1Ac insecticidal protein	y	India	Lepidoptera	Noctuidae	Helicoverpa	Helicoverpa armigera	F1	neonates	incorporation	7 d		7	5	32	1120 per population	probit analysis	Khammam 1999	MIC50	EC50	Cry1Ac, MVP-II protoxin	Cry1Ac	0.23	µg/ml	1000	230			0,16 - 0,34		1.25	0,77 - 2,68	3,077 ± 0,42	54.06
425	Jalali, S, K,, Mohan, K, S,, Singh, S, P,, Manjunath, T, M,, & Lalitha, Y,	2004	Crop Protection, 23(1): 53-59	Baseline-susceptibility of the old-world bollworm, Helicoverpa armigera (Hübner) (Lepidoptera: Noctuidae) populations from India to Bacillus thuringiensis Cry1Ac insecticidal protein	y	India	Lepidoptera	Noctuidae	Helicoverpa	Helicoverpa armigera	F1	neonates	incorporation	7 d		7	5	32	1120 per population	probit analysis	Guntur 1999	MIC50	EC50	Cry1Ac, MVP-II protoxin	Cry1Ac	0.12	µg/ml	1000	120			0,08 - 0,19		1.31	0,70 - 3,34	2,357 ± 0,27	61.51
425	Jalali, S, K,, Mohan, K, S,, Singh, S, P,, Manjunath, T, M,, & Lalitha, Y,	2004	Crop Protection, 23(1): 53-59	Baseline-susceptibility of the old-world bollworm, Helicoverpa armigera (Hübner) (Lepidoptera: Noctuidae) populations from India to Bacillus thuringiensis Cry1Ac insecticidal protein	y	India	Lepidoptera	Noctuidae	Helicoverpa	Helicoverpa armigera	F1	neonates	incorporation	7 d		7	5	32	1120 per population	probit analysis	Raichur 1999	MIC50	EC50	Cry1Ac, MVP-II protoxin	Cry1Ac	0.27	µg/ml	1000	270			0,19 - 0,38		1.26	0,80 - 2,61	3,237 ± 0,45	51.5
425	Jalali, S, K,, Mohan, K, S,, Singh, S, P,, Manjunath, T, M,, & Lalitha, Y,	2004	Crop Protection, 23(1): 53-59	Baseline-susceptibility of the old-world bollworm, Helicoverpa armigera (Hübner) (Lepidoptera: Noctuidae) populations from India to Bacillus thuringiensis Cry1Ac insecticidal protein	y	India	Lepidoptera	Noctuidae	Helicoverpa	Helicoverpa armigera	F1	neonates	incorporation	7 d		7	5	32	1120 per population	probit analysis	Coimbatore 1999	MIC50	EC50	Cry1Ac, MVP-II protoxin	Cry1Ac	0.1	µg/ml	1000	100			0,06 - 0,08		0.51	0,32 - 1,07	3,047 ± 0,41	54.5
425	Jalali, S, K,, Mohan, K, S,, Singh, S, P,, Manjunath, T, M,, & Lalitha, Y,	2004	Crop Protection, 23(1): 53-59	Baseline-susceptibility of the old-world bollworm, Helicoverpa armigera (Hübner) (Lepidoptera: Noctuidae) populations from India to Bacillus thuringiensis Cry1Ac insecticidal protein	y	India	Lepidoptera	Noctuidae	Helicoverpa	Helicoverpa armigera	F1	neonates	incorporation	7 d		7	5	32	1120 per population	probit analysis	Barwah 2001	MIC50	EC50	Cry1Ac, MVP-II protoxin	Cry1Ac	0.09	µg/ml	1000	90			0,06 - 0,14		0.62	0,36 - 1,39	2,817 ± 0,376	56.35
425	Jalali, S, K,, Mohan, K, S,, Singh, S, P,, Manjunath, T, M,, & Lalitha, Y,	2004	Crop Protection, 23(1): 53-59	Baseline-susceptibility of the old-world bollworm, Helicoverpa armigera (Hübner) (Lepidoptera: Noctuidae) populations from India to Bacillus thuringiensis Cry1Ac insecticidal protein	y	India	Lepidoptera	Noctuidae	Helicoverpa	Helicoverpa armigera	F1	neonates	incorporation	7 d		7	5	32	1120 per population	probit analysis	Khandwa 2001	MIC50	EC50	Cry1Ac, MVP-II protoxin	Cry1Ac	0.1	µg/ml	1000	100			0,07 - 0,15		0.65	0,39 - 1,42	2,907 ± 0,392	55.94
425	Jalali, S, K,, Mohan, K, S,, Singh, S, P,, Manjunath, T, M,, & Lalitha, Y,	2004	Crop Protection, 23(1): 53-59	Baseline-susceptibility of the old-world bollworm, Helicoverpa armigera (Hübner) (Lepidoptera: Noctuidae) populations from India to Bacillus thuringiensis Cry1Ac insecticidal protein	y	India	Lepidoptera	Noctuidae	Helicoverpa	Helicoverpa armigera	F1	neonates	incorporation	7 d		7	5	32	1120 per population	probit analysis	Rajkot 2001	MIC50	EC50	Cry1Ac, MVP-II protoxin	Cry1Ac	0.13	µg/ml	1000	130			0,09 - 0,19		0.69	0,43 - 1,45	2,907 ± 0,388	56
425	Jalali, S, K,, Mohan, K, S,, Singh, S, P,, Manjunath, T, M,, & Lalitha, Y,	2004	Crop Protection, 23(1): 53-59	Baseline-susceptibility of the old-world bollworm, Helicoverpa armigera (Hübner) (Lepidoptera: Noctuidae) populations from India to Bacillus thuringiensis Cry1Ac insecticidal protein	y	India	Lepidoptera	Noctuidae	Helicoverpa	Helicoverpa armigera	F1	neonates	incorporation	7 d		7	5	32	1120 per population	probit analysis	Vadodra 2001	MIC50	EC50	Cry1Ac, MVP-II protoxin	Cry1Ac	0.05	µg/ml	1000	50			0,04 - 0,08		0.28	0,17 - 0,59	3,117 ± 0,434	52.09
425	Jalali, S, K,, Mohan, K, S,, Singh, S, P,, Manjunath, T, M,, & Lalitha, Y,	2004	Crop Protection, 23(1): 53-59	Baseline-susceptibility of the old-world bollworm, Helicoverpa armigera (Hübner) (Lepidoptera: Noctuidae) populations from India to Bacillus thuringiensis Cry1Ac insecticidal protein	y	India	Lepidoptera	Noctuidae	Helicoverpa	Helicoverpa armigera	F1	neonates	incorporation	7 d		7	5	32	1120 per population	probit analysis	Jalgoan 2001	MIC50	EC50	Cry1Ac, MVP-II protoxin	Cry1Ac	0.13	µg/ml	1000	130			0,09 - 0,19		0.91	0,53 - 2,08	2,697 ± 0,36	58.94
425	Jalali, S, K,, Mohan, K, S,, Singh, S, P,, Manjunath, T, M,, & Lalitha, Y,	2004	Crop Protection, 23(1): 53-59	Baseline-susceptibility of the old-world bollworm, Helicoverpa armigera (Hübner) (Lepidoptera: Noctuidae) populations from India to Bacillus thuringiensis Cry1Ac insecticidal protein	y	India	Lepidoptera	Noctuidae	Helicoverpa	Helicoverpa armigera	F1	neonates	incorporation	7 d		7	5	32	1120 per population	probit analysis	Jalna 2001	MIC50	EC50	Cry1Ac, MVP-II protoxin	Cry1Ac	0.14	µg/ml	1000	140			0,10 - 0,20		0.55	0,37 - 1,11	3,727 ± 0,548	46.59
425	Jalali, S, K,, Mohan, K, S,, Singh, S, P,, Manjunath, T, M,, & Lalitha, Y,	2004	Crop Protection, 23(1): 53-59	Baseline-susceptibility of the old-world bollworm, Helicoverpa armigera (Hübner) (Lepidoptera: Noctuidae) populations from India to Bacillus thuringiensis Cry1Ac insecticidal protein	y	India	Lepidoptera	Noctuidae	Helicoverpa	Helicoverpa armigera	F1	neonates	incorporation	7 d		7	5	32	1120 per population	probit analysis	Yavatmal 2001	MIC50	EC50	Cry1Ac, MVP-II protoxin	Cry1Ac	0.08	µg/ml	1000	80			0,05 - 0,12		0.46	0,28 - 0,98	2,887 ± 0,394	53.8
425	Jalali, S, K,, Mohan, K, S,, Singh, S, P,, Manjunath, T, M,, & Lalitha, Y,	2004	Crop Protection, 23(1): 53-59	Baseline-susceptibility of the old-world bollworm, Helicoverpa armigera (Hübner) (Lepidoptera: Noctuidae) populations from India to Bacillus thuringiensis Cry1Ac insecticidal protein	y	India	Lepidoptera	Noctuidae	Helicoverpa	Helicoverpa armigera	F1	neonates	incorporation	7 d		7	5	32	1120 per population	probit analysis	Adilabad 2001	MIC50	EC50	Cry1Ac, MVP-II protoxin	Cry1Ac	0.07	µg/ml	1000	70			0,05 - 0,11		0.41	0,25 - 0,88	2,927 ± 0,392	55.92
425	Jalali, S, K,, Mohan, K, S,, Singh, S, P,, Manjunath, T, M,, & Lalitha, Y,	2004	Crop Protection, 23(1): 53-59	Baseline-susceptibility of the old-world bollworm, Helicoverpa armigera (Hübner) (Lepidoptera: Noctuidae) populations from India to Bacillus thuringiensis Cry1Ac insecticidal protein	y	India	Lepidoptera	Noctuidae	Helicoverpa	Helicoverpa armigera	F1	neonates	incorporation	7 d		7	5	32	1120 per population	probit analysis	Warangal 2001	MIC50	EC50	Cry1Ac, MVP-II protoxin	Cry1Ac	0.09	µg/ml	1000	90			0,06 - 0,15		0.48	0,30 - 1,00	3,317 ± 0,468	51.82
425	Jalali, S, K,, Mohan, K, S,, Singh, S, P,, Manjunath, T, M,, & Lalitha, Y,	2004	Crop Protection, 23(1): 53-59	Baseline-susceptibility of the old-world bollworm, Helicoverpa armigera (Hübner) (Lepidoptera: Noctuidae) populations from India to Bacillus thuringiensis Cry1Ac insecticidal protein	y	India	Lepidoptera	Noctuidae	Helicoverpa	Helicoverpa armigera	F1	neonates	incorporation	7 d		7	5	32	1120 per population	probit analysis	Guntur 2001	MIC50	EC50	Cry1Ac, MVP-II protoxin	Cry1Ac	0.12	µg/ml	1000	120			0,09 - 0,17		0.53	0,34 - 1,05	3,547 ± 0,514	48.69
425	Jalali, S, K,, Mohan, K, S,, Singh, S, P,, Manjunath, T, M,, & Lalitha, Y,	2004	Crop Protection, 23(1): 53-59	Baseline-susceptibility of the old-world bollworm, Helicoverpa armigera (Hübner) (Lepidoptera: Noctuidae) populations from India to Bacillus thuringiensis Cry1Ac insecticidal protein	y	India	Lepidoptera	Noctuidae	Helicoverpa	Helicoverpa armigera	F1	neonates	incorporation	7 d		7	5	32	1120 per population	probit analysis	Ranebennur 2001	MIC50	EC50	Cry1Ac, MVP-II protoxin	Cry1Ac	0.07	µg/ml	1000	70			0,05 - 0,10		0.36	0,22 - 0,74	3,177 ± 0,440	52.47
425	Jalali, S, K,, Mohan, K, S,, Singh, S, P,, Manjunath, T, M,, & Lalitha, Y,	2004	Crop Protection, 23(1): 53-59	Baseline-susceptibility of the old-world bollworm, Helicoverpa armigera (Hübner) (Lepidoptera: Noctuidae) populations from India to Bacillus thuringiensis Cry1Ac insecticidal protein	y	India	Lepidoptera	Noctuidae	Helicoverpa	Helicoverpa armigera	F1	neonates	incorporation	7 d		7	5	32	1120 per population	probit analysis	Davanagere 2001	MIC50	EC50	Cry1Ac, MVP-II protoxin	Cry1Ac	0.05	µg/ml	1000	50			0,03 - 0,07		0.26	0,16 - 0,54	3,587 ± 0,542	49.51
425	Jalali, S, K,, Mohan, K, S,, Singh, S, P,, Manjunath, T, M,, & Lalitha, Y,	2004	Crop Protection, 23(1): 53-59	Baseline-susceptibility of the old-world bollworm, Helicoverpa armigera (Hübner) (Lepidoptera: Noctuidae) populations from India to Bacillus thuringiensis Cry1Ac insecticidal protein	y	India	Lepidoptera	Noctuidae	Helicoverpa	Helicoverpa armigera	F1	neonates	incorporation	7 d		7	5	32	1120 per population	probit analysis	Coimbatore 2001	MIC50	EC50	Cry1Ac, MVP-II protoxin	Cry1Ac	0.05	µg/ml	1000	50			0,03 - 0,08		0.25	0,15 - 0,51	3,407 ± 0,490	51.2
425	Jalali, S, K,, Mohan, K, S,, Singh, S, P,, Manjunath, T, M,, & Lalitha, Y,	2004	Crop Protection, 23(1): 53-59	Baseline-susceptibility of the old-world bollworm, Helicoverpa armigera (Hübner) (Lepidoptera: Noctuidae) populations from India to Bacillus thuringiensis Cry1Ac insecticidal protein	y	India	Lepidoptera	Noctuidae	Helicoverpa	Helicoverpa armigera	F1	neonates	incorporation	7 d		7	5	32	1120 per population	probit analysis	Dindigul 2001	MIC50	EC50	Cry1Ac, MVP-II protoxin	Cry1Ac	0.07	µg/ml	1000	70			0,05 - 0,11		0.64	0,36 - 1,53	2,287 ± 0,290	61.86
425	Jalali, S, K,, Mohan, K, S,, Singh, S, P,, Manjunath, T, M,, & Lalitha, Y,	2004	Crop Protection, 23(1): 53-59	Baseline-susceptibility of the old-world bollworm, Helicoverpa armigera (Hübner) (Lepidoptera: Noctuidae) populations from India to Bacillus thuringiensis Cry1Ac insecticidal protein	y	India	Lepidoptera	Noctuidae	Helicoverpa	Helicoverpa armigera	F1	neonates	incorporation	7 d		7	5	32	1120 per population	probit analysis	Bathinda 1999	EC50	EC50	Cry1Ac, MVP-II protoxin	Cry1Ac	0.004	µg/ml	1000	4			0,003 - 0,005	EC90	0.031	0,014 - 0,167
425	Jalali, S, K,, Mohan, K, S,, Singh, S, P,, Manjunath, T, M,, & Lalitha, Y,	2004	Crop Protection, 23(1): 53-59	Baseline-susceptibility of the old-world bollworm, Helicoverpa armigera (Hübner) (Lepidoptera: Noctuidae) populations from India to Bacillus thuringiensis Cry1Ac insecticidal protein	y	India	Lepidoptera	Noctuidae	Helicoverpa	Helicoverpa armigera	F1	neonates	incorporation	7 d		7	5	32	1120 per population	probit analysis	Sirsa 1999	EC50	EC50	Cry1Ac, MVP-II protoxin	Cry1Ac	0.004	µg/ml	1000	4			0,002 - 0,005	EC90	0.068	0,035 - 0,197
425	Jalali, S, K,, Mohan, K, S,, Singh, S, P,, Manjunath, T, M,, & Lalitha, Y,	2004	Crop Protection, 23(1): 53-59	Baseline-susceptibility of the old-world bollworm, Helicoverpa armigera (Hübner) (Lepidoptera: Noctuidae) populations from India to Bacillus thuringiensis Cry1Ac insecticidal protein	y	India	Lepidoptera	Noctuidae	Helicoverpa	Helicoverpa armigera	F1	neonates	incorporation	7 d		7	5	32	1120 per population	probit analysis	Sriganganagar 1999	EC50	EC50	Cry1Ac, MVP-II protoxin	Cry1Ac	0.003	µg/ml	1000	3			0,003 - 0,003	EC90	0.039	0,025 - 0,072
425	Jalali, S, K,, Mohan, K, S,, Singh, S, P,, Manjunath, T, M,, & Lalitha, Y,	2004	Crop Protection, 23(1): 53-59	Baseline-susceptibility of the old-world bollworm, Helicoverpa armigera (Hübner) (Lepidoptera: Noctuidae) populations from India to Bacillus thuringiensis Cry1Ac insecticidal protein	y	India	Lepidoptera	Noctuidae	Helicoverpa	Helicoverpa armigera	F1	neonates	incorporation	7 d		7	5	32	1120 per population	probit analysis	Khandwa 1999	EC50	EC50	Cry1Ac, MVP-II protoxin	Cry1Ac	0.005	µg/ml	1000	5			0,004 - 0,006	EC90	0.053	0,044 - 0,074
425	Jalali, S, K,, Mohan, K, S,, Singh, S, P,, Manjunath, T, M,, & Lalitha, Y,	2004	Crop Protection, 23(1): 53-59	Baseline-susceptibility of the old-world bollworm, Helicoverpa armigera (Hübner) (Lepidoptera: Noctuidae) populations from India to Bacillus thuringiensis Cry1Ac insecticidal protein	y	India	Lepidoptera	Noctuidae	Helicoverpa	Helicoverpa armigera	F1	neonates	incorporation	7 d		7	5	32	1120 per population	probit analysis	Anand 1999	EC50	EC50	Cry1Ac, MVP-II protoxin	Cry1Ac	0.004	µg/ml	1000	4			0,003 - 0,005	EC90	0.062	0,041 - 0,100
425	Jalali, S, K,, Mohan, K, S,, Singh, S, P,, Manjunath, T, M,, & Lalitha, Y,	2004	Crop Protection, 23(1): 53-59	Baseline-susceptibility of the old-world bollworm, Helicoverpa armigera (Hübner) (Lepidoptera: Noctuidae) populations from India to Bacillus thuringiensis Cry1Ac insecticidal protein	y	India	Lepidoptera	Noctuidae	Helicoverpa	Helicoverpa armigera	F1	neonates	incorporation	7 d		7	5	32	1120 per population	probit analysis	Akola 1999	EC50	EC50	Cry1Ac, MVP-II protoxin	Cry1Ac	0.004	µg/ml	1000	4			0,003 - 0,004	EC90	0.029	0,019 - 0,052
425	Jalali, S, K,, Mohan, K, S,, Singh, S, P,, Manjunath, T, M,, & Lalitha, Y,	2004	Crop Protection, 23(1): 53-59	Baseline-susceptibility of the old-world bollworm, Helicoverpa armigera (Hübner) (Lepidoptera: Noctuidae) populations from India to Bacillus thuringiensis Cry1Ac insecticidal protein	y	India	Lepidoptera	Noctuidae	Helicoverpa	Helicoverpa armigera	F1	neonates	incorporation	7 d		7	5	32	1120 per population	probit analysis	Khammam 1999	EC50	EC50	Cry1Ac, MVP-II protoxin	Cry1Ac	0.004	µg/ml	1000	4			0,003 - 0,005	EC90	0.051	0,030 - 0,102
425	Jalali, S, K,, Mohan, K, S,, Singh, S, P,, Manjunath, T, M,, & Lalitha, Y,	2004	Crop Protection, 23(1): 53-59	Baseline-susceptibility of the old-world bollworm, Helicoverpa armigera (Hübner) (Lepidoptera: Noctuidae) populations from India to Bacillus thuringiensis Cry1Ac insecticidal protein	y	India	Lepidoptera	Noctuidae	Helicoverpa	Helicoverpa armigera	F1	neonates	incorporation	7 d		7	5	32	1120 per population	probit analysis	Guntur 1999	EC50	EC50	Cry1Ac, MVP-II protoxin	Cry1Ac	0.008	µg/ml	1000	8			0,006 - 0,010	EC90	0.076	0,045 - 0,146
425	Jalali, S, K,, Mohan, K, S,, Singh, S, P,, Manjunath, T, M,, & Lalitha, Y,	2004	Crop Protection, 23(1): 53-59	Baseline-susceptibility of the old-world bollworm, Helicoverpa armigera (Hübner) (Lepidoptera: Noctuidae) populations from India to Bacillus thuringiensis Cry1Ac insecticidal protein	y	India	Lepidoptera	Noctuidae	Helicoverpa	Helicoverpa armigera	F1	neonates	incorporation	7 d		7	5	32	1120 per population	probit analysis	Raichur 1999	EC50	EC50	Cry1Ac, MVP-II protoxin	Cry1Ac	0.003	µg/ml	1000	3			0,002 - 0,003	EC90	0.038	0,027 - 0,057
425	Jalali, S, K,, Mohan, K, S,, Singh, S, P,, Manjunath, T, M,, & Lalitha, Y,	2004	Crop Protection, 23(1): 53-59	Baseline-susceptibility of the old-world bollworm, Helicoverpa armigera (Hübner) (Lepidoptera: Noctuidae) populations from India to Bacillus thuringiensis Cry1Ac insecticidal protein	y	India	Lepidoptera	Noctuidae	Helicoverpa	Helicoverpa armigera	F1	neonates	incorporation	7 d		7	5	32	1120 per population	probit analysis	Coimbatore 1999	EC50	EC50	Cry1Ac, MVP-II protoxin	Cry1Ac	0.003	µg/ml	1000	3			0,003 - 0,004	EC90	0.042	0,032 - 0,065
425	Jalali, S, K,, Mohan, K, S,, Singh, S, P,, Manjunath, T, M,, & Lalitha, Y,	2004	Crop Protection, 23(1): 53-59	Baseline-susceptibility of the old-world bollworm, Helicoverpa armigera (Hübner) (Lepidoptera: Noctuidae) populations from India to Bacillus thuringiensis Cry1Ac insecticidal protein	y	India	Lepidoptera	Noctuidae	Helicoverpa	Helicoverpa armigera	F1	neonates	incorporation	7 d		7	5	32	1120 per population	probit analysis	Barwah 2001	EC50	EC50	Cry1Ac, MVP-II protoxin	Cry1Ac	0.002	µg/ml	1000	2			0,002 - 0,002	EC90	0.016	0,014 - 0,019
425	Jalali, S, K,, Mohan, K, S,, Singh, S, P,, Manjunath, T, M,, & Lalitha, Y,	2004	Crop Protection, 23(1): 53-59	Baseline-susceptibility of the old-world bollworm, Helicoverpa armigera (Hübner) (Lepidoptera: Noctuidae) populations from India to Bacillus thuringiensis Cry1Ac insecticidal protein	y	India	Lepidoptera	Noctuidae	Helicoverpa	Helicoverpa armigera	F1	neonates	incorporation	7 d		7	5	32	1120 per population	probit analysis	Khandwa 2001	EC50	EC50	Cry1Ac, MVP-II protoxin	Cry1Ac	0.003	µg/ml	1000	3			0,003 - 0,005	EC90	0.047	0,020 - 0,262
425	Jalali, S, K,, Mohan, K, S,, Singh, S, P,, Manjunath, T, M,, & Lalitha, Y,	2004	Crop Protection, 23(1): 53-59	Baseline-susceptibility of the old-world bollworm, Helicoverpa armigera (Hübner) (Lepidoptera: Noctuidae) populations from India to Bacillus thuringiensis Cry1Ac insecticidal protein	y	India	Lepidoptera	Noctuidae	Helicoverpa	Helicoverpa armigera	F1	neonates	incorporation	7 d		7	5	32	1120 per population	probit analysis	Rajkot 2001	EC50	EC50	Cry1Ac, MVP-II protoxin	Cry1Ac	0.001	µg/ml	1000	1			0,000 - 0,002	EC90	0.028	0,014 - 0,090
425	Jalali, S, K,, Mohan, K, S,, Singh, S, P,, Manjunath, T, M,, & Lalitha, Y,	2004	Crop Protection, 23(1): 53-59	Baseline-susceptibility of the old-world bollworm, Helicoverpa armigera (Hübner) (Lepidoptera: Noctuidae) populations from India to Bacillus thuringiensis Cry1Ac insecticidal protein	y	India	Lepidoptera	Noctuidae	Helicoverpa	Helicoverpa armigera	F1	neonates	incorporation	7 d		7	5	32	1120 per population	probit analysis	Vadodra 2001	EC50	EC50	Cry1Ac, MVP-II protoxin	Cry1Ac	0.002	µg/ml	1000	2			0,002 - 0,002	EC90	0.014	0,011 - 0,018
425	Jalali, S, K,, Mohan, K, S,, Singh, S, P,, Manjunath, T, M,, & Lalitha, Y,	2004	Crop Protection, 23(1): 53-59	Baseline-susceptibility of the old-world bollworm, Helicoverpa armigera (Hübner) (Lepidoptera: Noctuidae) populations from India to Bacillus thuringiensis Cry1Ac insecticidal protein	y	India	Lepidoptera	Noctuidae	Helicoverpa	Helicoverpa armigera	F1	neonates	incorporation	7 d		7	5	32	1120 per population	probit analysis	Jalgoan 2001	EC50	EC50	Cry1Ac, MVP-II protoxin	Cry1Ac	0.004	µg/ml	1000	4			0,003 - 0,005	EC90	0.028	0,019 - 0,044
425	Jalali, S, K,, Mohan, K, S,, Singh, S, P,, Manjunath, T, M,, & Lalitha, Y,	2004	Crop Protection, 23(1): 53-59	Baseline-susceptibility of the old-world bollworm, Helicoverpa armigera (Hübner) (Lepidoptera: Noctuidae) populations from India to Bacillus thuringiensis Cry1Ac insecticidal protein	y	India	Lepidoptera	Noctuidae	Helicoverpa	Helicoverpa armigera	F1	neonates	incorporation	7 d		7	5	32	1120 per population	probit analysis	Jalna 2001	EC50	EC50	Cry1Ac, MVP-II protoxin	Cry1Ac	0.002	µg/ml	1000	2			0,001 - 0,002	EC90	0.03	0,020 - 0,050
425	Jalali, S, K,, Mohan, K, S,, Singh, S, P,, Manjunath, T, M,, & Lalitha, Y,	2004	Crop Protection, 23(1): 53-59	Baseline-susceptibility of the old-world bollworm, Helicoverpa armigera (Hübner) (Lepidoptera: Noctuidae) populations from India to Bacillus thuringiensis Cry1Ac insecticidal protein	y	India	Lepidoptera	Noctuidae	Helicoverpa	Helicoverpa armigera	F1	neonates	incorporation	7 d		7	5	32	1120 per population	probit analysis	Yavatmal 2001	EC50	EC50	Cry1Ac, MVP-II protoxin	Cry1Ac	0.0003	µg/ml	1000	0.3			0,0002 - 0,0004	EC90	0.01	0,008 - 0,016
425	Jalali, S, K,, Mohan, K, S,, Singh, S, P,, Manjunath, T, M,, & Lalitha, Y,	2004	Crop Protection, 23(1): 53-59	Baseline-susceptibility of the old-world bollworm, Helicoverpa armigera (Hübner) (Lepidoptera: Noctuidae) populations from India to Bacillus thuringiensis Cry1Ac insecticidal protein	y	India	Lepidoptera	Noctuidae	Helicoverpa	Helicoverpa armigera	F1	neonates	incorporation	7 d		7	5	32	1120 per population	probit analysis	Adilabad 2001	EC50	EC50	Cry1Ac, MVP-II protoxin	Cry1Ac	0.001	µg/ml	1000	1			0,000 - 0,001	EC90	0.019	0,013 - 0,031
425	Jalali, S, K,, Mohan, K, S,, Singh, S, P,, Manjunath, T, M,, & Lalitha, Y,	2004	Crop Protection, 23(1): 53-59	Baseline-susceptibility of the old-world bollworm, Helicoverpa armigera (Hübner) (Lepidoptera: Noctuidae) populations from India to Bacillus thuringiensis Cry1Ac insecticidal protein	y	India	Lepidoptera	Noctuidae	Helicoverpa	Helicoverpa armigera	F1	neonates	incorporation	7 d		7	5	32	1120 per population	probit analysis	Warangal 2001	EC50	EC50	Cry1Ac, MVP-II protoxin	Cry1Ac	0.002	µg/ml	1000	2			0,001 - 0,002	EC90	0.032	0,023 - 0,045
425	Jalali, S, K,, Mohan, K, S,, Singh, S, P,, Manjunath, T, M,, & Lalitha, Y,	2004	Crop Protection, 23(1): 53-59	Baseline-susceptibility of the old-world bollworm, Helicoverpa armigera (Hübner) (Lepidoptera: Noctuidae) populations from India to Bacillus thuringiensis Cry1Ac insecticidal protein	y	India	Lepidoptera	Noctuidae	Helicoverpa	Helicoverpa armigera	F1	neonates	incorporation	7 d		7	5	32	1120 per population	probit analysis	Guntur 2001	EC50	EC50	Cry1Ac, MVP-II protoxin	Cry1Ac	0.003	µg/ml	1000	3			0,002 - 0,004	EC90	0.054	0,026 - 0,054
425	Jalali, S, K,, Mohan, K, S,, Singh, S, P,, Manjunath, T, M,, & Lalitha, Y,	2004	Crop Protection, 23(1): 53-59	Baseline-susceptibility of the old-world bollworm, Helicoverpa armigera (Hübner) (Lepidoptera: Noctuidae) populations from India to Bacillus thuringiensis Cry1Ac insecticidal protein	y	India	Lepidoptera	Noctuidae	Helicoverpa	Helicoverpa armigera	F1	neonates	incorporation	7 d		7	5	32	1120 per population	probit analysis	Ranebennur 2001	EC50	EC50	Cry1Ac, MVP-II protoxin	Cry1Ac	0.003	µg/ml	1000	3			0,002 - 0,004	EC90	0.043	0,027 - 0,111
425	Jalali, S, K,, Mohan, K, S,, Singh, S, P,, Manjunath, T, M,, & Lalitha, Y,	2004	Crop Protection, 23(1): 53-59	Baseline-susceptibility of the old-world bollworm, Helicoverpa armigera (Hübner) (Lepidoptera: Noctuidae) populations from India to Bacillus thuringiensis Cry1Ac insecticidal protein	y	India	Lepidoptera	Noctuidae	Helicoverpa	Helicoverpa armigera	F1	neonates	incorporation	7 d		7	5	32	1120 per population	probit analysis	Davanagere 2001	EC50	EC50	Cry1Ac, MVP-II protoxin	Cry1Ac	0.0004	µg/ml	1000	0.4			0,0002 - 0,0005	EC90	0.013	0,010 - 0,021
425	Jalali, S, K,, Mohan, K, S,, Singh, S, P,, Manjunath, T, M,, & Lalitha, Y,	2004	Crop Protection, 23(1): 53-59	Baseline-susceptibility of the old-world bollworm, Helicoverpa armigera (Hübner) (Lepidoptera: Noctuidae) populations from India to Bacillus thuringiensis Cry1Ac insecticidal protein	y	India	Lepidoptera	Noctuidae	Helicoverpa	Helicoverpa armigera	F1	neonates	incorporation	7 d		7	5	32	1120 per population	probit analysis	Coimbatore 2001	EC50	EC50	Cry1Ac, MVP-II protoxin	Cry1Ac	0.001	µg/ml	1000	1			0,000 - 0,001	EC90	0.009	0,009 - 0,010
425	Jalali, S, K,, Mohan, K, S,, Singh, S, P,, Manjunath, T, M,, & Lalitha, Y,	2004	Crop Protection, 23(1): 53-59	Baseline-susceptibility of the old-world bollworm, Helicoverpa armigera (Hübner) (Lepidoptera: Noctuidae) populations from India to Bacillus thuringiensis Cry1Ac insecticidal protein	y	India	Lepidoptera	Noctuidae	Helicoverpa	Helicoverpa armigera	F1	neonates	incorporation	7 d		7	5	32	1120 per population	probit analysis	Dindigul 2001	EC50	EC50	Cry1Ac, MVP-II protoxin	Cry1Ac	0.001	µg/ml	1000	1			0,001 - 0,001	EC90	0.014	0,012 - 0,018
1044	Jalali, S, K,, Lalitha, Y,, Kamath, S, P,, Mohan, K, S,, & Head, G, P,	2010	Pest Management Science, 66(8): 809-815	Baseline sensitivity of lepidopteran corn pests in India to Cry1Ab insecticidal protein of Bacillus thuringiensis		India	Lepidoptera	Noctuidae	Helicoverpa	Helicoverpa armigera	F2, F3	neonates	incorporation	7 d		7	7	112	896 per population	probit analysis	Ludhiana	LC50	LC50	Cry1Ab	Cry1Ab	1.532	µg/ml	1000	1532			0,830 - 3,040	LC90 (µg/ml)	17.294	5,580 - 71,700	1,29 (±0,24)	6.08		x	y	n	y	y	y	y	y
1044	Jalali, S, K,, Lalitha, Y,, Kamath, S, P,, Mohan, K, S,, & Head, G, P,	2010	Pest Management Science, 66(8): 809-815	Baseline sensitivity of lepidopteran corn pests in India to Cry1Ab insecticidal protein of Bacillus thuringiensis		India	Lepidoptera	Noctuidae	Helicoverpa	Helicoverpa armigera	F2, F3	neonates	incorporation	7 d		7	7	112	896 per population	probit analysis	Sirsa	LC50	LC50	Cry1Ab	Cry1Ab	1.57	µg/ml	1000	1570			0,930 - 3,090	LC90 (µg/ml)	14.916	6,142 - 49,920	1,39 (±0,25)	4.9
1044	Jalali, S, K,, Lalitha, Y,, Kamath, S, P,, Mohan, K, S,, & Head, G, P,	2010	Pest Management Science, 66(8): 809-815	Baseline sensitivity of lepidopteran corn pests in India to Cry1Ab insecticidal protein of Bacillus thuringiensis		India	Lepidoptera	Noctuidae	Helicoverpa	Helicoverpa armigera	F2, F3	neonates	incorporation	7 d		7	7	112	896 per population	probit analysis	Udaipur	LC50	LC50	Cry1Ab	Cry1Ab	0.122	µg/ml	1000	122			0,072 - 0,219	LC90 (µg/ml)	1.03	0,533 - 3,253	1,56 (±0,26)	3.17
1044	Jalali, S, K,, Lalitha, Y,, Kamath, S, P,, Mohan, K, S,, & Head, G, P,	2010	Pest Management Science, 66(8): 809-815	Baseline sensitivity of lepidopteran corn pests in India to Cry1Ab insecticidal protein of Bacillus thuringiensis		India	Lepidoptera	Noctuidae	Helicoverpa	Helicoverpa armigera	F2, F3	neonates	incorporation	7 d		7	7	112	896 per population	probit analysis	Aurangabad	LC50	LC50	Cry1Ab	Cry1Ab	0.123	µg/ml	1000	123			0,079 - 0,203	LC90 (µg/ml)	1.034	0,539 - 3,230	1,43 (±0,24)	2.96
1044	Jalali, S, K,, Lalitha, Y,, Kamath, S, P,, Mohan, K, S,, & Head, G, P,	2010	Pest Management Science, 66(8): 809-815	Baseline sensitivity of lepidopteran corn pests in India to Cry1Ab insecticidal protein of Bacillus thuringiensis		India	Lepidoptera	Noctuidae	Helicoverpa	Helicoverpa armigera	F2, F3	neonates	incorporation	7 d		7	7	112	896 per population	probit analysis	Chhindwara	LC50	LC50	Cry1Ab	Cry1Ab	0.119	µg/ml	1000	119			0,063 - 0,190	LC90 (µg/ml)	1.489	0,652 - 5,345	1,70 (±0,26)	6.03
1044	Jalali, S, K,, Lalitha, Y,, Kamath, S, P,, Mohan, K, S,, & Head, G, P,	2010	Pest Management Science, 66(8): 809-815	Baseline sensitivity of lepidopteran corn pests in India to Cry1Ab insecticidal protein of Bacillus thuringiensis		India	Lepidoptera	Noctuidae	Helicoverpa	Helicoverpa armigera	F2, F3	neonates	incorporation	7 d		7	7	112	896 per population	probit analysis	Hyderabad	LC50	LC50	Cry1Ab	Cry1Ab	0.432	µg/ml	1000	432			0,170 - 2,030	LC90 (µg/ml)	11.617	2,690 - 30,968	0,94 (±0,16)	5.87
1044	Jalali, S, K,, Lalitha, Y,, Kamath, S, P,, Mohan, K, S,, & Head, G, P,	2010	Pest Management Science, 66(8): 809-815	Baseline sensitivity of lepidopteran corn pests in India to Cry1Ab insecticidal protein of Bacillus thuringiensis		India	Lepidoptera	Noctuidae	Helicoverpa	Helicoverpa armigera	F2, F3	neonates	incorporation	7 d		7	7	112	896 per population	probit analysis	Coimbatore	LC50	LC50	Cry1Ab	Cry1Ab	1.99	µg/ml	1000	1990			1,199 - 3,920	LC90 (µg/ml)	10.579	4,921 - 53,691	2,15 (±0,42)	5.56
1044	Jalali, S, K,, Lalitha, Y,, Kamath, S, P,, Mohan, K, S,, & Head, G, P,	2010	Pest Management Science, 66(8): 809-815	Baseline sensitivity of lepidopteran corn pests in India to Cry1Ab insecticidal protein of Bacillus thuringiensis		India	Lepidoptera	Noctuidae	Helicoverpa	Helicoverpa armigera	F2, F3	neonates	incorporation	7 d		7	7	112	896 per population	probit analysis	Ludhiana	MIC50	EC50	Cry1Ab	Cry1Ab	0.54	µg/ml	1000	540			0,29 - 1,25	MIC90	6.29	2,51 - 23,20	1,22 (±0,19)	5.69
1044	Jalali, S, K,, Lalitha, Y,, Kamath, S, P,, Mohan, K, S,, & Head, G, P,	2010	Pest Management Science, 66(8): 809-815	Baseline sensitivity of lepidopteran corn pests in India to Cry1Ab insecticidal protein of Bacillus thuringiensis		India	Lepidoptera	Noctuidae	Helicoverpa	Helicoverpa armigera	F2, F3	neonates	incorporation	7 d		7	7	112	896 per population	probit analysis	Sirsa	MIC50	EC50	Cry1Ab	Cry1Ab	0.69	µg/ml	1000	690			0,34 - 1,13	MIC90	9.52	2,94 - 35,96	1,22 (±0,20)	6.23
1044	Jalali, S, K,, Lalitha, Y,, Kamath, S, P,, Mohan, K, S,, & Head, G, P,	2010	Pest Management Science, 66(8): 809-815	Baseline sensitivity of lepidopteran corn pests in India to Cry1Ab insecticidal protein of Bacillus thuringiensis		India	Lepidoptera	Noctuidae	Helicoverpa	Helicoverpa armigera	F2, F3	neonates	incorporation	7 d		7	7	112	896 per population	probit analysis	Udaipur	MIC50	EC50	Cry1Ab	Cry1Ab	0.07	µg/ml	1000	70			0,04 - 0,10	MIC90	0.3	0,17 - 0,78	2,12 (±0,43)	2.61
1044	Jalali, S, K,, Lalitha, Y,, Kamath, S, P,, Mohan, K, S,, & Head, G, P,	2010	Pest Management Science, 66(8): 809-815	Baseline sensitivity of lepidopteran corn pests in India to Cry1Ab insecticidal protein of Bacillus thuringiensis		India	Lepidoptera	Noctuidae	Helicoverpa	Helicoverpa armigera	F2, F3	neonates	incorporation	7 d		7	7	112	896 per population	probit analysis	Aurangabad	MIC50	EC50	Cry1Ab	Cry1Ab	0.07	µg/ml	1000	70			0,04 - 0,11	MIC90	0.46	0,25 - 1,32	1,62 (±0,30)	4.07
1044	Jalali, S, K,, Lalitha, Y,, Kamath, S, P,, Mohan, K, S,, & Head, G, P,	2010	Pest Management Science, 66(8): 809-815	Baseline sensitivity of lepidopteran corn pests in India to Cry1Ab insecticidal protein of Bacillus thuringiensis		India	Lepidoptera	Noctuidae	Helicoverpa	Helicoverpa armigera	F2, F3	neonates	incorporation	7 d		7	7	112	896 per population	probit analysis	Chhindwara	MIC50	EC50	Cry1Ab	Cry1Ab	0.07	µg/ml	1000	70			0,04 - 0,11	MIC90	0.58	0,30 - 1,87	1,37 (±0,25)	5.1
1044	Jalali, S, K,, Lalitha, Y,, Kamath, S, P,, Mohan, K, S,, & Head, G, P,	2010	Pest Management Science, 66(8): 809-815	Baseline sensitivity of lepidopteran corn pests in India to Cry1Ab insecticidal protein of Bacillus thuringiensis		India	Lepidoptera	Noctuidae	Helicoverpa	Helicoverpa armigera	F2, F3	neonates	incorporation	7 d		7	7	112	896 per population	probit analysis	Hyderabad	MIC50	EC50	Cry1Ab	Cry1Ab	0.15	µg/ml	1000	150			0,07 - 0,32	MIC90	2.38	0,90 - 9,08	1,09 (±0,19)	4.98
1044	Jalali, S, K,, Lalitha, Y,, Kamath, S, P,, Mohan, K, S,, & Head, G, P,	2010	Pest Management Science, 66(8): 809-815	Baseline sensitivity of lepidopteran corn pests in India to Cry1Ab insecticidal protein of Bacillus thuringiensis		India	Lepidoptera	Noctuidae	Helicoverpa	Helicoverpa armigera	F2, F3	neonates	incorporation	7 d		7	7	112	896 per population	probit analysis	Coimbatore	MIC50	EC50	Cry1Ab	Cry1Ab	1.14	µg/ml	1000	1140			0,76 - 1,77	MIC90	4.69	2,65 - 14,28	0,45 (±0,45)	3.65
1044	Jalali, S, K,, Lalitha, Y,, Kamath, S, P,, Mohan, K, S,, & Head, G, P,	2010	Pest Management Science, 66(8): 809-815	Baseline sensitivity of lepidopteran corn pests in India to Cry1Ab insecticidal protein of Bacillus thuringiensis		India	Lepidoptera	Noctuidae	Helicoverpa	Helicoverpa armigera	F2, F3	neonates	incorporation	7 d		7	7	112	896 per population	probit analysis	Ludhiana	EC50	EC50	Cry1Ab	Cry1Ab	0.003	µg/ml	1000	3			0,002 - 0,005	EC90	0.22	0,107 - 0,695
1044	Jalali, S, K,, Lalitha, Y,, Kamath, S, P,, Mohan, K, S,, & Head, G, P,	2010	Pest Management Science, 66(8): 809-815	Baseline sensitivity of lepidopteran corn pests in India to Cry1Ab insecticidal protein of Bacillus thuringiensis		India	Lepidoptera	Noctuidae	Helicoverpa	Helicoverpa armigera	F2, F3	neonates	incorporation	7 d		7	7	112	896 per population	probit analysis	Sirsa	EC50	EC50	Cry1Ab	Cry1Ab	0.008	µg/ml	1000	8			0,004 - 0,018	EC90	0.485	0,201 - 1,310
1044	Jalali, S, K,, Lalitha, Y,, Kamath, S, P,, Mohan, K, S,, & Head, G, P,	2010	Pest Management Science, 66(8): 809-815	Baseline sensitivity of lepidopteran corn pests in India to Cry1Ab insecticidal protein of Bacillus thuringiensis		India	Lepidoptera	Noctuidae	Helicoverpa	Helicoverpa armigera	F2, F3	neonates	incorporation	7 d		7	7	112	896 per population	probit analysis	Udaipur	EC50	EC50	Cry1Ab	Cry1Ab	0.008	µg/ml	1000	8			0,004 - 0,013	EC90	0.266	0,089 - 2,003
1044	Jalali, S, K,, Lalitha, Y,, Kamath, S, P,, Mohan, K, S,, & Head, G, P,	2010	Pest Management Science, 66(8): 809-815	Baseline sensitivity of lepidopteran corn pests in India to Cry1Ab insecticidal protein of Bacillus thuringiensis		India	Lepidoptera	Noctuidae	Helicoverpa	Helicoverpa armigera	F2, F3	neonates	incorporation	7 d		7	7	112	896 per population	probit analysis	Aurangabad	EC50	EC50	Cry1Ab	Cry1Ab	0.002	µg/ml	1000	2			0,002 - 0,004	EC90	0.081	0,054 - 0,154
1044	Jalali, S, K,, Lalitha, Y,, Kamath, S, P,, Mohan, K, S,, & Head, G, P,	2010	Pest Management Science, 66(8): 809-815	Baseline sensitivity of lepidopteran corn pests in India to Cry1Ab insecticidal protein of Bacillus thuringiensis		India	Lepidoptera	Noctuidae	Helicoverpa	Helicoverpa armigera	F2, F3	neonates	incorporation	7 d		7	7	112	896 per population	probit analysis	Chhindwara	EC50	EC50	Cry1Ab	Cry1Ab	0.002	µg/ml	1000	2			0,001 - 0,003	EC90	0.067	0,047 - 0,104
1044	Jalali, S, K,, Lalitha, Y,, Kamath, S, P,, Mohan, K, S,, & Head, G, P,	2010	Pest Management Science, 66(8): 809-815	Baseline sensitivity of lepidopteran corn pests in India to Cry1Ab insecticidal protein of Bacillus thuringiensis		India	Lepidoptera	Noctuidae	Helicoverpa	Helicoverpa armigera	F2, F3	neonates	incorporation	7 d		7	7	112	896 per population	probit analysis	Hyderabad	EC50	EC50	Cry1Ab	Cry1Ab	0.002	µg/ml	1000	2			0,0005 - 0,006	EC90	0.627	0,201 - 2,230
1044	Jalali, S, K,, Lalitha, Y,, Kamath, S, P,, Mohan, K, S,, & Head, G, P,	2010	Pest Management Science, 66(8): 809-815	Baseline sensitivity of lepidopteran corn pests in India to Cry1Ab insecticidal protein of Bacillus thuringiensis		India	Lepidoptera	Noctuidae	Helicoverpa	Helicoverpa armigera	F2, F3	neonates	incorporation	7 d		7	7	112	896 per population	probit analysis	Coimbatore	EC50	EC50	Cry1Ab	Cry1Ab	0.003	µg/ml	1000	3			0,001 - 0,004	EC90	0.108	0,074 - 0,215
8266	Kalia, V,, Archana, K,, Mittal, A,, Singh, B, P,, Nair, R,, & Gujar, G, T,	2006	Pesticide Research Journal, 18(1): 47-50	Temporal variation in susceptibility of American bollworm, Helicoverpa armigera to Bacillus thuringiensis (Bt) var, kurstaki HD-73, its Cry1Ac toxin and Bt cotton	y	India	Lepidoptera	Noctuidae	Helicoverpa	Helicoverpa armigera	F1	neonates	incorporation	4 d					>50	probit analysis	Sirsa 2001	LC50	LC50	Cry1Ac/HD-73 E, coli acetone powder	Cry1Ac	0.08	µg/g	1000	80			0,06 - 0,10				1,99 ± 0,30			x	n	n	n	n	n	n	y
8266	Kalia, V,, Archana, K,, Mittal, A,, Singh, B, P,, Nair, R,, & Gujar, G, T,	2006	Pesticide Research Journal, 18(1): 47-50	Temporal variation in susceptibility of American bollworm, Helicoverpa armigera to Bacillus thuringiensis (Bt) var, kurstaki HD-73, its Cry1Ac toxin and Bt cotton	y	India	Lepidoptera	Noctuidae	Helicoverpa	Helicoverpa armigera	F1	neonates	incorporation	4 d					>50	probit analysis	Sirsa 2002	LC50	LC50	Cry1Ac/HD-73 E, coli acetone powder	Cry1Ac	0.53	µg/g	1000	530			0,45 - 0,64				2,01 ± 0,22
8266	Kalia, V,, Archana, K,, Mittal, A,, Singh, B, P,, Nair, R,, & Gujar, G, T,	2006	Pesticide Research Journal, 18(1): 47-50	Temporal variation in susceptibility of American bollworm, Helicoverpa armigera to Bacillus thuringiensis (Bt) var, kurstaki HD-73, its Cry1Ac toxin and Bt cotton	y	India	Lepidoptera	Noctuidae	Helicoverpa	Helicoverpa armigera	F1	neonates	incorporation	4 d					>50	probit analysis	Sirsa 2003	LC50	LC50	Cry1Ac/HD-73 E, coli acetone powder	Cry1Ac	2.95	µg/g	1000	2950			2,40 - 3,52				2,51 ± 0,34
8266	Kalia, V,, Archana, K,, Mittal, A,, Singh, B, P,, Nair, R,, & Gujar, G, T,	2006	Pesticide Research Journal, 18(1): 47-50	Temporal variation in susceptibility of American bollworm, Helicoverpa armigera to Bacillus thuringiensis (Bt) var, kurstaki HD-73, its Cry1Ac toxin and Bt cotton	y	India	Lepidoptera	Noctuidae	Helicoverpa	Helicoverpa armigera	F1	neonates	incorporation	4 d					>50	probit analysis	Sirsa 2004	LC50	LC50	Cry1Ac/HD-73 E, coli acetone powder	Cry1Ac	3.34	µg/g	1000	3340			2,43 - 4,93				1,75 ± 0,29
8266	Kalia, V,, Archana, K,, Mittal, A,, Singh, B, P,, Nair, R,, & Gujar, G, T,	2006	Pesticide Research Journal, 18(1): 47-50	Temporal variation in susceptibility of American bollworm, Helicoverpa armigera to Bacillus thuringiensis (Bt) var, kurstaki HD-73, its Cry1Ac toxin and Bt cotton	y	India	Lepidoptera	Noctuidae	Helicoverpa	Helicoverpa armigera	F1	neonates	incorporation	4 d					>50	probit analysis	Delhi 2000	LC50	LC50	Cry1Ac/HD-73 E, coli acetone powder	Cry1Ac	0.12	µg/g	1000	120			0,09 - 0,16				1,62 ± 0,24
8266	Kalia, V,, Archana, K,, Mittal, A,, Singh, B, P,, Nair, R,, & Gujar, G, T,	2006	Pesticide Research Journal, 18(1): 47-50	Temporal variation in susceptibility of American bollworm, Helicoverpa armigera to Bacillus thuringiensis (Bt) var, kurstaki HD-73, its Cry1Ac toxin and Bt cotton	y	India	Lepidoptera	Noctuidae	Helicoverpa	Helicoverpa armigera	F1	neonates	incorporation	4 d					>50	probit analysis	Delhi 2001	LC50	LC50	Cry1Ac/HD-73 E, coli acetone powder	Cry1Ac	0.18	µg/g	1000	180			0,12 - 0,36				1,24 z 0,34
8266	Kalia, V,, Archana, K,, Mittal, A,, Singh, B, P,, Nair, R,, & Gujar, G, T,	2006	Pesticide Research Journal, 18(1): 47-50	Temporal variation in susceptibility of American bollworm, Helicoverpa armigera to Bacillus thuringiensis (Bt) var, kurstaki HD-73, its Cry1Ac toxin and Bt cotton	y	India	Lepidoptera	Noctuidae	Helicoverpa	Helicoverpa armigera	F1	neonates	incorporation	4 d					>50	probit analysis	Delhi 2002	LC50	LC50	Cry1Ac/HD-73 E, coli acetone powder	Cry1Ac	0.39	µg/g	1000	390			0,25 - 0,74				0,97 ± 0,18
8266	Kalia, V,, Archana, K,, Mittal, A,, Singh, B, P,, Nair, R,, & Gujar, G, T,	2006	Pesticide Research Journal, 18(1): 47-50	Temporal variation in susceptibility of American bollworm, Helicoverpa armigera to Bacillus thuringiensis (Bt) var, kurstaki HD-73, its Cry1Ac toxin and Bt cotton	y	India	Lepidoptera	Noctuidae	Helicoverpa	Helicoverpa armigera	F1	neonates	incorporation	4 d					>50	probit analysis	Delhi 2003	LC50	LC50	Cry1Ac/HD-73 E, coli acetone powder	Cry1Ac	1.86	µg/g	1000	1860			1,43 - 2,50				2,23 ± 0,39
8266	Kalia, V,, Archana, K,, Mittal, A,, Singh, B, P,, Nair, R,, & Gujar, G, T,	2006	Pesticide Research Journal, 18(1): 47-50	Temporal variation in susceptibility of American bollworm, Helicoverpa armigera to Bacillus thuringiensis (Bt) var, kurstaki HD-73, its Cry1Ac toxin and Bt cotton	y	India	Lepidoptera	Noctuidae	Helicoverpa	Helicoverpa armigera	F1	neonates	incorporation	4 d					>50	probit analysis	Delhi 2005	LC50	LC50	Cry1Ac/HD-73 E, coli acetone powder	Cry1Ac	4.5	µg/g	1000	4500			2,85 - 8,74				1,01 ± 0,19
8266	Kalia, V,, Archana, K,, Mittal, A,, Singh, B, P,, Nair, R,, & Gujar, G, T,	2006	Pesticide Research Journal, 18(1): 47-50	Temporal variation in susceptibility of American bollworm, Helicoverpa armigera to Bacillus thuringiensis (Bt) var, kurstaki HD-73, its Cry1Ac toxin and Bt cotton	y	India	Lepidoptera	Noctuidae	Helicoverpa	Helicoverpa armigera	F1	neonates	incorporation	4 d					>50	probit analysis	Bhatinda 2000	LC50	LC50	Cry1Ac/HD-73 E, coli acetone powder	Cry1Ac	0.04	µg/g	1000	40			0,02 - 0,07				1,48 ± 0,29
8266	Kalia, V,, Archana, K,, Mittal, A,, Singh, B, P,, Nair, R,, & Gujar, G, T,	2006	Pesticide Research Journal, 18(1): 47-50	Temporal variation in susceptibility of American bollworm, Helicoverpa armigera to Bacillus thuringiensis (Bt) var, kurstaki HD-73, its Cry1Ac toxin and Bt cotton	y	India	Lepidoptera	Noctuidae	Helicoverpa	Helicoverpa armigera	F1	neonates	incorporation	4 d					>50	probit analysis	Bhatinda 2001	LC50	LC50	Cry1Ac/HD-73 E, coli acetone powder	Cry1Ac	0.25	µg/g	1000	250			0,16 - 0,91				0,98 ± 0,32
8266	Kalia, V,, Archana, K,, Mittal, A,, Singh, B, P,, Nair, R,, & Gujar, G, T,	2006	Pesticide Research Journal, 18(1): 47-50	Temporal variation in susceptibility of American bollworm, Helicoverpa armigera to Bacillus thuringiensis (Bt) var, kurstaki HD-73, its Cry1Ac toxin and Bt cotton	y	India	Lepidoptera	Noctuidae	Helicoverpa	Helicoverpa armigera	F1	neonates	incorporation	4 d					>50	probit analysis	Bhatinda 2005	LC50	LC50	Cry1Ac/HD-73 E, coli acetone powder	Cry1Ac	5.14	µg/g	1000	5140			3,20 - 11,94				1,20 ± 0,23
8266	Kalia, V,, Archana, K,, Mittal, A,, Singh, B, P,, Nair, R,, & Gujar, G, T,	2006	Pesticide Research Journal, 18(1): 47-50	Temporal variation in susceptibility of American bollworm, Helicoverpa armigera to Bacillus thuringiensis (Bt) var, kurstaki HD-73, its Cry1Ac toxin and Bt cotton	y	India	Lepidoptera	Noctuidae	Helicoverpa	Helicoverpa armigera	F1	neonates	incorporation	4 d					>50	probit analysis	Nanded 2002	LC50	LC50		Cry1Ac	0.3	µg/g	1000	300			0,23 - 0,40				2,00 ± 0,31
8266	Kalia, V,, Archana, K,, Mittal, A,, Singh, B, P,, Nair, R,, & Gujar, G, T,	2006	Pesticide Research Journal, 18(1): 47-50	Temporal variation in susceptibility of American bollworm, Helicoverpa armigera to Bacillus thuringiensis (Bt) var, kurstaki HD-73, its Cry1Ac toxin and Bt cotton	y	India	Lepidoptera	Noctuidae	Helicoverpa	Helicoverpa armigera	F1	neonates	incorporation	4 d					>50	probit analysis	Nanded 2004	LC50	LC50		Cry1Ac	5.42	µg/g	1000	5420			0,77 - 8,83				1,39 ± 0,22
8266	Kalia, V,, Archana, K,, Mittal, A,, Singh, B, P,, Nair, R,, & Gujar, G, T,	2006	Pesticide Research Journal, 18(1): 47-50	Temporal variation in susceptibility of American bollworm, Helicoverpa armigera to Bacillus thuringiensis (Bt) var, kurstaki HD-73, its Cry1Ac toxin and Bt cotton	y	India	Lepidoptera	Noctuidae	Helicoverpa	Helicoverpa armigera	F1	neonates	incorporation	4 d					>50	probit analysis	Coimbatore	LC50	LC50		Cry1Ac	0.159	µg/g	1000	159			0,09 - 0,26				0,75 ± 0,15
8266	Kalia, V,, Archana, K,, Mittal, A,, Singh, B, P,, Nair, R,, & Gujar, G, T,	2006	Pesticide Research Journal, 18(1): 47-50	Temporal variation in susceptibility of American bollworm, Helicoverpa armigera to Bacillus thuringiensis (Bt) var, kurstaki HD-73, its Cry1Ac toxin and Bt cotton	y	India	Lepidoptera	Noctuidae	Helicoverpa	Helicoverpa armigera	F1	neonates	leaf surface	4 d					>50	probit analysis	Coimbatore	LC50	LC50		Cry1Ac	0.052	µg/ml	1000	52			0,03 - 0,07				1,19 ± 0,15
1709	Kashyap, S, & Amla, D,, V	2007	African Journal of Biotechnology, 6(15): 1821-1827	Characterisation of Bacillus thuringiensis Kurstaki strains by toxicity, plasmid profiles and numerical analysis of their cryIA genes	y	India	Lepidoptera	Noctuidae	Helicoverpa	Helicoverpa armigera	F1	neonates	surface	6 - 8 d						(UPGMA) of NTSYS-pc 2,02		LC50	LC50	Cry1Ac HD73	Cry1Ac	0.04	ng/cm2	1	0.04										x	y	y	y	n	y	n	n
1709	Kashyap, S, & Amla, D,, V	2007	African Journal of Biotechnology, 6(15): 1821-1827	Characterisation of Bacillus thuringiensis Kurstaki strains by toxicity, plasmid profiles and numerical analysis of their cryIA genes	y	India	Lepidoptera	Noctuidae	Helicoverpa	Helicoverpa armigera	F1	neonates	surface	6 - 8 d						(UPGMA) of NTSYS-pc 2,02		LC50	LC50	Cry1Ac HD1	Cry1Ac	0.031	ng/cm2	1	0.031
4444	Kaur, P, & Dilawari, V, K,	2011	Pest Management Science, 67(10): 1294-1302	Inheritance of resistance to Bacillus thuringiensis Cry1Ac toxin in Helicoverpa armigera (Hubner) (Lepidoptera: Noctuidae) from India	y	India	Lepidoptera	Noctuidae	Helicoverpa	Helicoverpa armigera	F1	2nd instar	incorporation	7 d		several				probit analysis	Bathinda (B)	LC50	LC50	Cry1Ac (MPV-II protoxin encapsulated in Pseudomonas florescense)	Cry1Ac	0.202	µg/ml	1000	202			0,118–0,326				2,381 ± 0,276	5.37		x	y	n	Y	n	n	n	y
4444	Kaur, P, & Dilawari, V, K,	2011	Pest Management Science, 67(10): 1294-1302	Inheritance of resistance to Bacillus thuringiensis Cry1Ac toxin in Helicoverpa armigera (Hubner) (Lepidoptera: Noctuidae) from India	y	India	Lepidoptera	Noctuidae	Helicoverpa	Helicoverpa armigera	F1	2nd instar	incorporation	7 d		several				probit analysis	Abohar (A)	LC50	LC50	Cry1Ac (MPV-II protoxin encapsulated in Pseudomonas florescense)	Cry1Ac	0.151	µg/ml	1000	151			0,098–0,211				1,084 ± 0,115	3.44
4444	Kaur, P, & Dilawari, V, K,	2011	Pest Management Science, 67(10): 1294-1302	Inheritance of resistance to Bacillus thuringiensis Cry1Ac toxin in Helicoverpa armigera (Hubner) (Lepidoptera: Noctuidae) from India	y	India	Lepidoptera	Noctuidae	Helicoverpa	Helicoverpa armigera	F1	2nd instar	incorporation	7 d		several				probit analysis	Faridkot (F)	LC50	LC50	Cry1Ac (MPV-II protoxin encapsulated in Pseudomonas florescense)	Cry1Ac	0.151	µg/ml	1000	151			0,090–0,230				1,064 ± 0,125	3.32
4444	Kaur, P, & Dilawari, V, K,	2011	Pest Management Science, 67(10): 1294-1302	Inheritance of resistance to Bacillus thuringiensis Cry1Ac toxin in Helicoverpa armigera (Hubner) (Lepidoptera: Noctuidae) from India	y	India	Lepidoptera	Noctuidae	Helicoverpa	Helicoverpa armigera	F1	2nd instar	incorporation	7 d		several				probit analysis	Mansa (Mn)	LC50	LC50	Cry1Ac (MPV-II protoxin encapsulated in Pseudomonas florescense)	Cry1Ac	0.19	µg/ml	1000	190			0,145–0,244				2,438 ± 0,281	5.86
4444	Kaur, P, & Dilawari, V, K,	2011	Pest Management Science, 67(10): 1294-1302	Inheritance of resistance to Bacillus thuringiensis Cry1Ac toxin in Helicoverpa armigera (Hubner) (Lepidoptera: Noctuidae) from India	y	India	Lepidoptera	Noctuidae	Helicoverpa	Helicoverpa armigera	F1	2nd instar	incorporation	7 d		several				probit analysis	Muktsar (M)	LC50	LC50	Cry1Ac (MPV-II protoxin encapsulated in Pseudomonas florescense)	Cry1Ac	0.181	µg/ml	1000	181			0,108–0,274				1,787 ± 0,245	5.95
4444	Kaur, P, & Dilawari, V, K,	2011	Pest Management Science, 67(10): 1294-1302	Inheritance of resistance to Bacillus thuringiensis Cry1Ac toxin in Helicoverpa armigera (Hubner) (Lepidoptera: Noctuidae) from India	y	India	Lepidoptera	Noctuidae	Helicoverpa	Helicoverpa armigera	F1	2nd instar	incorporation	7 d		several				probit analysis	Hoshiarpur (H)	LC50	LC50	Cry1Ac (MPV-II protoxin encapsulated in Pseudomonas florescense)	Cry1Ac	0.087	µg/ml	1000	87			0,050–0,129				2,381 ± 0,276	5.37
4444	Kaur, P, & Dilawari, V, K,	2011	Pest Management Science, 67(10): 1294-1302	Inheritance of resistance to Bacillus thuringiensis Cry1Ac toxin in Helicoverpa armigera (Hubner) (Lepidoptera: Noctuidae) from India	y	India	Lepidoptera	Noctuidae	Helicoverpa	Helicoverpa armigera	F1	2nd instar	incorporation	7 d		several				probit analysis	Ludhiana (L)	LC50	LC50	Cry1Ac (MPV-II protoxin encapsulated in Pseudomonas florescense)	Cry1Ac	0.106	µg/ml	1000	106			0,065–0,152				0,989 ± 0,196	5.94
	Kranthi KR, Kranthi S, Ali S, Banerjee SK	2000	Curr Sci 78:1001-4,	Resistance to ‘CrylAc delta-endotoxin of Bacillus thuringiensis’ in a laboratory selected strain of Helicoverpa armigera (Hubner),	y	India	Lepidoptera	Noctuidae	Helicoverpa	Helicoverpa armigera	F1, pooled from different field collections	one-day old larvae	incorporation	6 d		various	3 x 2-3		24 per concentration	probit analysis		LC50	LC50	Cry1Ac	Cry1Ac	0.185	µg/ml	1000	185			0,065 - 0,356	LC90 (μg/ml)	0,95		1,80 ± 0,21			x	n	n	y	y	y	n	y
	Kranthi KR, Kranthi S, Ali S, Banerjee SK	2000	Curr Sci 78:1001-4,	Resistance to ‘CrylAc delta-endotoxin of Bacillus thuringiensis’ in a laboratory selected strain of Helicoverpa armigera (Hubner),	y	India	Lepidoptera	Noctuidae	Helicoverpa	Helicoverpa armigera	F1, pooled from different field collections	one-day old larvae	incorporation	6 d		various	3 x 2-3		24 per concentration	probit analysis		EC50	EC50	Cry1Ac	Cry1Ac	0.0136	µg/ml	1000	13.6			0,009 - 0,193	EC90 (μg/ml)	0.084		1,62 ± 0,26
183	Kranthi, S,, Dhawad, C, S,, Naidu, S,, Bharose, A,, Chaudhary, A,, Sangode, V,, Nehare, S, K,, Bajaj, S, R,, & Kranthi, K, R,	2009	Crop Protection, 28(5): 371-375	Susceptibility of the cotton bollworm, Helicoverpa armigera (Hubner) (Lepidoptera: Noctuidae) to the Bacillus thuringiensis toxin Cry2Ab before and after the introduction of Bollgard-II	y	India	Lepidoptera	Noctuidae	Helicoverpa	Helicoverpa armigera	F1	one-day old larvae	incorporation	6 d		5			2960	probit analysis	Guntur	LC50	LC50	Cry2Ab	Cry2Ab	11.59	µg/g	1000	11590			6,00–35,29				1,05 ± 0,20	0.89		x	y	n	Y	y	n	y	y
183	Kranthi, S,, Dhawad, C, S,, Naidu, S,, Bharose, A,, Chaudhary, A,, Sangode, V,, Nehare, S, K,, Bajaj, S, R,, & Kranthi, K, R,	2009	Crop Protection, 28(5): 371-375	Susceptibility of the cotton bollworm, Helicoverpa armigera (Hubner) (Lepidoptera: Noctuidae) to the Bacillus thuringiensis toxin Cry2Ab before and after the introduction of Bollgard-II	y	India	Lepidoptera	Noctuidae	Helicoverpa	Helicoverpa armigera	F1	one-day old larvae	incorporation	6 d		5			2960	probit analysis	Warangal 2005	LC50	LC50	Cry2Ab	Cry2Ab	15.24	µg/g	1000	15240			7,48–57,04				1,02 ± 0,22	0.52
183	Kranthi, S,, Dhawad, C, S,, Naidu, S,, Bharose, A,, Chaudhary, A,, Sangode, V,, Nehare, S, K,, Bajaj, S, R,, & Kranthi, K, R,	2009	Crop Protection, 28(5): 371-375	Susceptibility of the cotton bollworm, Helicoverpa armigera (Hubner) (Lepidoptera: Noctuidae) to the Bacillus thuringiensis toxin Cry2Ab before and after the introduction of Bollgard-II	y	India	Lepidoptera	Noctuidae	Helicoverpa	Helicoverpa armigera	F1	one-day old larvae	incorporation	6 d		5			2960	probit analysis	Karimnagar 2005	LC50	LC50	Cry2Ab	Cry2Ab	8.26	µg/g	1000	8260			4,48–20,86				1,08 ± 0,21	0.72
183	Kranthi, S,, Dhawad, C, S,, Naidu, S,, Bharose, A,, Chaudhary, A,, Sangode, V,, Nehare, S, K,, Bajaj, S, R,, & Kranthi, K, R,	2009	Crop Protection, 28(5): 371-375	Susceptibility of the cotton bollworm, Helicoverpa armigera (Hubner) (Lepidoptera: Noctuidae) to the Bacillus thuringiensis toxin Cry2Ab before and after the introduction of Bollgard-II	y	India	Lepidoptera	Noctuidae	Helicoverpa	Helicoverpa armigera	F1	one-day old larvae	incorporation	6 d		5			2960	probit analysis	Khammam 2005	LC50	LC50	Cry2Ab	Cry2Ab	6	µg/g	1000	6000			3,42–12,94				1,13 ± 0,20	0.61
183	Kranthi, S,, Dhawad, C, S,, Naidu, S,, Bharose, A,, Chaudhary, A,, Sangode, V,, Nehare, S, K,, Bajaj, S, R,, & Kranthi, K, R,	2009	Crop Protection, 28(5): 371-375	Susceptibility of the cotton bollworm, Helicoverpa armigera (Hubner) (Lepidoptera: Noctuidae) to the Bacillus thuringiensis toxin Cry2Ab before and after the introduction of Bollgard-II	y	India	Lepidoptera	Noctuidae	Helicoverpa	Helicoverpa armigera	F1	one-day old larvae	incorporation	6 d		5			2960	probit analysis	Dharwad 2005	LC50	LC50	Cry2Ab	Cry2Ab	17.96	µg/g	1000	17960			8,29–83,06				0,96 ± 0,22	0.58
183	Kranthi, S,, Dhawad, C, S,, Naidu, S,, Bharose, A,, Chaudhary, A,, Sangode, V,, Nehare, S, K,, Bajaj, S, R,, & Kranthi, K, R,	2009	Crop Protection, 28(5): 371-375	Susceptibility of the cotton bollworm, Helicoverpa armigera (Hubner) (Lepidoptera: Noctuidae) to the Bacillus thuringiensis toxin Cry2Ab before and after the introduction of Bollgard-II	y	India	Lepidoptera	Noctuidae	Helicoverpa	Helicoverpa armigera	F1	one-day old larvae	incorporation	6 d		5			2960	probit analysis	Coimbatore 2005	LC50	LC50	Cry2Ab	Cry2Ab	8.91	µg/g	1000	8910			4,62–25,40				0,98 ± 0,18	1.04
183	Kranthi, S,, Dhawad, C, S,, Naidu, S,, Bharose, A,, Chaudhary, A,, Sangode, V,, Nehare, S, K,, Bajaj, S, R,, & Kranthi, K, R,	2009	Crop Protection, 28(5): 371-375	Susceptibility of the cotton bollworm, Helicoverpa armigera (Hubner) (Lepidoptera: Noctuidae) to the Bacillus thuringiensis toxin Cry2Ab before and after the introduction of Bollgard-II	y	India	Lepidoptera	Noctuidae	Helicoverpa	Helicoverpa armigera	F1	one-day old larvae	incorporation	6 d		5			2960	probit analysis	Abohar 2005	LC50	LC50	Cry2Ab	Cry2Ab	17.84	µg/g	1000	17840			7,93–90,26				0,91 ± 0,21	0.92
183	Kranthi, S,, Dhawad, C, S,, Naidu, S,, Bharose, A,, Chaudhary, A,, Sangode, V,, Nehare, S, K,, Bajaj, S, R,, & Kranthi, K, R,	2009	Crop Protection, 28(5): 371-375	Susceptibility of the cotton bollworm, Helicoverpa armigera (Hubner) (Lepidoptera: Noctuidae) to the Bacillus thuringiensis toxin Cry2Ab before and after the introduction of Bollgard-II	y	India	Lepidoptera	Noctuidae	Helicoverpa	Helicoverpa armigera	F1	one-day old larvae	incorporation	6 d		5			2960	probit analysis	Hissar 2005	LC50	LC50	Cry2Ab	Cry2Ab	11.92	µg/g	1000	11920			6,94–32,01				1,19 ± 0,22	0.39
183	Kranthi, S,, Dhawad, C, S,, Naidu, S,, Bharose, A,, Chaudhary, A,, Sangode, V,, Nehare, S, K,, Bajaj, S, R,, & Kranthi, K, R,	2009	Crop Protection, 28(5): 371-375	Susceptibility of the cotton bollworm, Helicoverpa armigera (Hubner) (Lepidoptera: Noctuidae) to the Bacillus thuringiensis toxin Cry2Ab before and after the introduction of Bollgard-II	y	India	Lepidoptera	Noctuidae	Helicoverpa	Helicoverpa armigera	F1	one-day old larvae	incorporation	6 d		5			2960	probit analysis	Fatehabad 2005	LC50	LC50	Cry2Ab	Cry2Ab	16.04	µg/g	1000	16040			7,30–73,83				0,92 ± 0,20	0.77
183	Kranthi, S,, Dhawad, C, S,, Naidu, S,, Bharose, A,, Chaudhary, A,, Sangode, V,, Nehare, S, K,, Bajaj, S, R,, & Kranthi, K, R,	2009	Crop Protection, 28(5): 371-375	Susceptibility of the cotton bollworm, Helicoverpa armigera (Hubner) (Lepidoptera: Noctuidae) to the Bacillus thuringiensis toxin Cry2Ab before and after the introduction of Bollgard-II	y	India	Lepidoptera	Noctuidae	Helicoverpa	Helicoverpa armigera	F1	one-day old larvae	incorporation	6 d		5			2960	probit analysis	Sriganganagar 2005	LC50	LC50	Cry2Ab	Cry2Ab	14.92	µg/g	1000	14920			6,53–75,07				0,85 ± 0,19	2.57
183	Kranthi, S,, Dhawad, C, S,, Naidu, S,, Bharose, A,, Chaudhary, A,, Sangode, V,, Nehare, S, K,, Bajaj, S, R,, & Kranthi, K, R,	2009	Crop Protection, 28(5): 371-375	Susceptibility of the cotton bollworm, Helicoverpa armigera (Hubner) (Lepidoptera: Noctuidae) to the Bacillus thuringiensis toxin Cry2Ab before and after the introduction of Bollgard-II	y	India	Lepidoptera	Noctuidae	Helicoverpa	Helicoverpa armigera	F1	one-day old larvae	incorporation	6 d		5			2960	probit analysis	Sirsa 2005	LC50	LC50	Cry2Ab	Cry2Ab	14.45	µg/g	1000	14450			6,75–60,01				0,93 ± 0,20	0.61
183	Kranthi, S,, Dhawad, C, S,, Naidu, S,, Bharose, A,, Chaudhary, A,, Sangode, V,, Nehare, S, K,, Bajaj, S, R,, & Kranthi, K, R,	2009	Crop Protection, 28(5): 371-375	Susceptibility of the cotton bollworm, Helicoverpa armigera (Hubner) (Lepidoptera: Noctuidae) to the Bacillus thuringiensis toxin Cry2Ab before and after the introduction of Bollgard-II	y	India	Lepidoptera	Noctuidae	Helicoverpa	Helicoverpa armigera	F1	one-day old larvae	incorporation	6 d		5			2960	probit analysis	Hanumangarh 2005	LC50	LC50	Cry2Ab	Cry2Ab	13.59	µg/g	1000	13590			6,58–50,41				0,97 ± 0,20	1
183	Kranthi, S,, Dhawad, C, S,, Naidu, S,, Bharose, A,, Chaudhary, A,, Sangode, V,, Nehare, S, K,, Bajaj, S, R,, & Kranthi, K, R,	2009	Crop Protection, 28(5): 371-375	Susceptibility of the cotton bollworm, Helicoverpa armigera (Hubner) (Lepidoptera: Noctuidae) to the Bacillus thuringiensis toxin Cry2Ab before and after the introduction of Bollgard-II	y	India	Lepidoptera	Noctuidae	Helicoverpa	Helicoverpa armigera	F1	one-day old larvae	incorporation	6 d		5			2960	probit analysis	Mansa 2005	LC50	LC50	Cry2Ab	Cry2Ab	11.98	µg/g	1000	11980			5,56–48,39				0,87 ± 0,19	1.36
183	Kranthi, S,, Dhawad, C, S,, Naidu, S,, Bharose, A,, Chaudhary, A,, Sangode, V,, Nehare, S, K,, Bajaj, S, R,, & Kranthi, K, R,	2009	Crop Protection, 28(5): 371-375	Susceptibility of the cotton bollworm, Helicoverpa armigera (Hubner) (Lepidoptera: Noctuidae) to the Bacillus thuringiensis toxin Cry2Ab before and after the introduction of Bollgard-II	y	India	Lepidoptera	Noctuidae	Helicoverpa	Helicoverpa armigera	F1	one-day old larvae	incorporation	6 d		5			2960	probit analysis	Bhatinda 2005	LC50	LC50	Cry2Ab	Cry2Ab	9.71	µg/g	1000	9710			4,53–36,94				0,84 ± 0,18	2.5
183	Kranthi, S,, Dhawad, C, S,, Naidu, S,, Bharose, A,, Chaudhary, A,, Sangode, V,, Nehare, S, K,, Bajaj, S, R,, & Kranthi, K, R,	2009	Crop Protection, 28(5): 371-375	Susceptibility of the cotton bollworm, Helicoverpa armigera (Hubner) (Lepidoptera: Noctuidae) to the Bacillus thuringiensis toxin Cry2Ab before and after the introduction of Bollgard-II	y	India	Lepidoptera	Noctuidae	Helicoverpa	Helicoverpa armigera	F1	one-day old larvae	incorporation	6 d		5			2960	probit analysis	Bharuch 2005	LC50	LC50	Cry2Ab	Cry2Ab	12.3	µg/g	1000	12300			5,31–65,07				0,86 ± 0,21	1.13
183	Kranthi, S,, Dhawad, C, S,, Naidu, S,, Bharose, A,, Chaudhary, A,, Sangode, V,, Nehare, S, K,, Bajaj, S, R,, & Kranthi, K, R,	2009	Crop Protection, 28(5): 371-375	Susceptibility of the cotton bollworm, Helicoverpa armigera (Hubner) (Lepidoptera: Noctuidae) to the Bacillus thuringiensis toxin Cry2Ab before and after the introduction of Bollgard-II	y	India	Lepidoptera	Noctuidae	Helicoverpa	Helicoverpa armigera	F1	one-day old larvae	incorporation	6 d		5			2960	probit analysis	Vadodara 2005	LC50	LC50	Cry2Ab	Cry2Ab	11.9	µg/g	1000	11900			6,54–31,75				1,19 ± 0,24	0.42
183	Kranthi, S,, Dhawad, C, S,, Naidu, S,, Bharose, A,, Chaudhary, A,, Sangode, V,, Nehare, S, K,, Bajaj, S, R,, & Kranthi, K, R,	2009	Crop Protection, 28(5): 371-375	Susceptibility of the cotton bollworm, Helicoverpa armigera (Hubner) (Lepidoptera: Noctuidae) to the Bacillus thuringiensis toxin Cry2Ab before and after the introduction of Bollgard-II	y	India	Lepidoptera	Noctuidae	Helicoverpa	Helicoverpa armigera	F1	one-day old larvae	incorporation	6 d		5			2960	probit analysis	Surat 2005	LC50	LC50	Cry2Ab	Cry2Ab	22.55	µg/g	1000	22550			8,89–205,6				0,90 ± 0,23	0.49
183	Kranthi, S,, Dhawad, C, S,, Naidu, S,, Bharose, A,, Chaudhary, A,, Sangode, V,, Nehare, S, K,, Bajaj, S, R,, & Kranthi, K, R,	2009	Crop Protection, 28(5): 371-375	Susceptibility of the cotton bollworm, Helicoverpa armigera (Hubner) (Lepidoptera: Noctuidae) to the Bacillus thuringiensis toxin Cry2Ab before and after the introduction of Bollgard-II	y	India	Lepidoptera	Noctuidae	Helicoverpa	Helicoverpa armigera	F1	one-day old larvae	incorporation	6 d		5			2960	probit analysis	Surendranagar 2005	LC50	LC50	Cry2Ab	Cry2Ab	13.89	µg/g	1000	13890			6,96–48,02				1,04 ± 0,22	0.46
183	Kranthi, S,, Dhawad, C, S,, Naidu, S,, Bharose, A,, Chaudhary, A,, Sangode, V,, Nehare, S, K,, Bajaj, S, R,, & Kranthi, K, R,	2009	Crop Protection, 28(5): 371-375	Susceptibility of the cotton bollworm, Helicoverpa armigera (Hubner) (Lepidoptera: Noctuidae) to the Bacillus thuringiensis toxin Cry2Ab before and after the introduction of Bollgard-II	y	India	Lepidoptera	Noctuidae	Helicoverpa	Helicoverpa armigera	F1	one-day old larvae	incorporation	6 d		5			2960	probit analysis	Amreli 2005	LC50	LC50	Cry2Ab	Cry2Ab	18.5	µg/g	1000	18500			7,73–114,51				0,84 ± 0,19	1.03
183	Kranthi, S,, Dhawad, C, S,, Naidu, S,, Bharose, A,, Chaudhary, A,, Sangode, V,, Nehare, S, K,, Bajaj, S, R,, & Kranthi, K, R,	2009	Crop Protection, 28(5): 371-375	Susceptibility of the cotton bollworm, Helicoverpa armigera (Hubner) (Lepidoptera: Noctuidae) to the Bacillus thuringiensis toxin Cry2Ab before and after the introduction of Bollgard-II	y	India	Lepidoptera	Noctuidae	Helicoverpa	Helicoverpa armigera	F1	one-day old larvae	incorporation	6 d		5			2960	probit analysis	Wardha 2005	LC50	LC50	Cry2Ab	Cry2Ab	18.44	µg/g	1000	18440			7,74–112,64				0,85 ± 0,19	1.12
183	Kranthi, S,, Dhawad, C, S,, Naidu, S,, Bharose, A,, Chaudhary, A,, Sangode, V,, Nehare, S, K,, Bajaj, S, R,, & Kranthi, K, R,	2009	Crop Protection, 28(5): 371-375	Susceptibility of the cotton bollworm, Helicoverpa armigera (Hubner) (Lepidoptera: Noctuidae) to the Bacillus thuringiensis toxin Cry2Ab before and after the introduction of Bollgard-II	y	India	Lepidoptera	Noctuidae	Helicoverpa	Helicoverpa armigera	F1	one-day old larvae	incorporation	6 d		5			2960	probit analysis	Aurangabad 2005	LC50	LC50	Cry2Ab	Cry2Ab	28.6	µg/g	1000	28600			12,47–206,60				1,05 ± 0,27	1.37
183	Kranthi, S,, Dhawad, C, S,, Naidu, S,, Bharose, A,, Chaudhary, A,, Sangode, V,, Nehare, S, K,, Bajaj, S, R,, & Kranthi, K, R,	2009	Crop Protection, 28(5): 371-375	Susceptibility of the cotton bollworm, Helicoverpa armigera (Hubner) (Lepidoptera: Noctuidae) to the Bacillus thuringiensis toxin Cry2Ab before and after the introduction of Bollgard-II	y	India	Lepidoptera	Noctuidae	Helicoverpa	Helicoverpa armigera	F1	one-day old larvae	incorporation	6 d		5			2960	probit analysis	Chindwara 2005	LC50	LC50	Cry2Ab	Cry2Ab	20.82	µg/g	1000	20820			8,44–147,08				0,83 ± 0,19	0.86
183	Kranthi, S,, Dhawad, C, S,, Naidu, S,, Bharose, A,, Chaudhary, A,, Sangode, V,, Nehare, S, K,, Bajaj, S, R,, & Kranthi, K, R,	2009	Crop Protection, 28(5): 371-375	Susceptibility of the cotton bollworm, Helicoverpa armigera (Hubner) (Lepidoptera: Noctuidae) to the Bacillus thuringiensis toxin Cry2Ab before and after the introduction of Bollgard-II	y	India	Lepidoptera	Noctuidae	Helicoverpa	Helicoverpa armigera	F1	one-day old larvae	incorporation	6 d		5			2960	probit analysis	Hingoli 2005	LC50	LC50	Cry2Ab	Cry2Ab	12.69	µg/g	1000	12690			6,48–40,80				1,04 ± 0,22	0.67
183	Kranthi, S,, Dhawad, C, S,, Naidu, S,, Bharose, A,, Chaudhary, A,, Sangode, V,, Nehare, S, K,, Bajaj, S, R,, & Kranthi, K, R,	2009	Crop Protection, 28(5): 371-375	Susceptibility of the cotton bollworm, Helicoverpa armigera (Hubner) (Lepidoptera: Noctuidae) to the Bacillus thuringiensis toxin Cry2Ab before and after the introduction of Bollgard-II	y	India	Lepidoptera	Noctuidae	Helicoverpa	Helicoverpa armigera	F1	one-day old larvae	incorporation	6 d		5			2960	probit analysis	Parbhani 2005	LC50	LC50	Cry2Ab	Cry2Ab	10.19	µg/g	1000	10190			4,68–41,27				0,82 ± 0,18	2.03
183	Kranthi, S,, Dhawad, C, S,, Naidu, S,, Bharose, A,, Chaudhary, A,, Sangode, V,, Nehare, S, K,, Bajaj, S, R,, & Kranthi, K, R,	2009	Crop Protection, 28(5): 371-375	Susceptibility of the cotton bollworm, Helicoverpa armigera (Hubner) (Lepidoptera: Noctuidae) to the Bacillus thuringiensis toxin Cry2Ab before and after the introduction of Bollgard-II	y	India	Lepidoptera	Noctuidae	Helicoverpa	Helicoverpa armigera	F1	one-day old larvae	incorporation	6 d		5			2960	probit analysis	Nagpur 2005	LC50	LC50	Cry2Ab	Cry2Ab	16.24	µg/g	1000	16240			7,69–67,93				0,98 ± 0,21	0.66
183	Kranthi, S,, Dhawad, C, S,, Naidu, S,, Bharose, A,, Chaudhary, A,, Sangode, V,, Nehare, S, K,, Bajaj, S, R,, & Kranthi, K, R,	2009	Crop Protection, 28(5): 371-375	Susceptibility of the cotton bollworm, Helicoverpa armigera (Hubner) (Lepidoptera: Noctuidae) to the Bacillus thuringiensis toxin Cry2Ab before and after the introduction of Bollgard-II	y	India	Lepidoptera	Noctuidae	Helicoverpa	Helicoverpa armigera	F1	one-day old larvae	incorporation	6 d		5			2960	probit analysis	Warangal 2007	LC50	LC50	Cry2Ab	Cry2Ab	6.58	µg/g	1000	6580			2,11–123,35				0,95 ± 0,21	1.61						y			y
183	Kranthi, S,, Dhawad, C, S,, Naidu, S,, Bharose, A,, Chaudhary, A,, Sangode, V,, Nehare, S, K,, Bajaj, S, R,, & Kranthi, K, R,	2009	Crop Protection, 28(5): 371-375	Susceptibility of the cotton bollworm, Helicoverpa armigera (Hubner) (Lepidoptera: Noctuidae) to the Bacillus thuringiensis toxin Cry2Ab before and after the introduction of Bollgard-II	y	India	Lepidoptera	Noctuidae	Helicoverpa	Helicoverpa armigera	F1	one-day old larvae	incorporation	6 d		5			2960	probit analysis	Khammam 2007	LC50	LC50	Cry2Ab	Cry2Ab	2.46	µg/g	1000	2460			1,30–5,31				1,44 ± 0,24	1.08
183	Kranthi, S,, Dhawad, C, S,, Naidu, S,, Bharose, A,, Chaudhary, A,, Sangode, V,, Nehare, S, K,, Bajaj, S, R,, & Kranthi, K, R,	2009	Crop Protection, 28(5): 371-375	Susceptibility of the cotton bollworm, Helicoverpa armigera (Hubner) (Lepidoptera: Noctuidae) to the Bacillus thuringiensis toxin Cry2Ab before and after the introduction of Bollgard-II	y	India	Lepidoptera	Noctuidae	Helicoverpa	Helicoverpa armigera	F1	one-day old larvae	incorporation	6 d		5			2960	probit analysis	Dharwad 2007	LC50	LC50	Cry2Ab	Cry2Ab	15.42	µg/g	1000	15420			6,29–81,25				0,77 ± 0,19	0.6
183	Kranthi, S,, Dhawad, C, S,, Naidu, S,, Bharose, A,, Chaudhary, A,, Sangode, V,, Nehare, S, K,, Bajaj, S, R,, & Kranthi, K, R,	2009	Crop Protection, 28(5): 371-375	Susceptibility of the cotton bollworm, Helicoverpa armigera (Hubner) (Lepidoptera: Noctuidae) to the Bacillus thuringiensis toxin Cry2Ab before and after the introduction of Bollgard-II	y	India	Lepidoptera	Noctuidae	Helicoverpa	Helicoverpa armigera	F1	one-day old larvae	incorporation	6 d		5			2960	probit analysis	Rangareddy 2007	LC50	LC50	Cry2Ab	Cry2Ab	8.23	µg/g	1000	8230			2,21–76,58				1,03 ± 0,12	0.53
183	Kranthi, S,, Dhawad, C, S,, Naidu, S,, Bharose, A,, Chaudhary, A,, Sangode, V,, Nehare, S, K,, Bajaj, S, R,, & Kranthi, K, R,	2009	Crop Protection, 28(5): 371-375	Susceptibility of the cotton bollworm, Helicoverpa armigera (Hubner) (Lepidoptera: Noctuidae) to the Bacillus thuringiensis toxin Cry2Ab before and after the introduction of Bollgard-II	y	India	Lepidoptera	Noctuidae	Helicoverpa	Helicoverpa armigera	F1	one-day old larvae	incorporation	6 d		5			2960	probit analysis	Fatehabad 2007	LC50	LC50	Cry2Ab	Cry2Ab	34.26	µg/g	1000	34260			23,43–95,00				0,47 ± 0,17	0.57
183	Kranthi, S,, Dhawad, C, S,, Naidu, S,, Bharose, A,, Chaudhary, A,, Sangode, V,, Nehare, S, K,, Bajaj, S, R,, & Kranthi, K, R,	2009	Crop Protection, 28(5): 371-375	Susceptibility of the cotton bollworm, Helicoverpa armigera (Hubner) (Lepidoptera: Noctuidae) to the Bacillus thuringiensis toxin Cry2Ab before and after the introduction of Bollgard-II	y	India	Lepidoptera	Noctuidae	Helicoverpa	Helicoverpa armigera	F1	one-day old larvae	incorporation	6 d		5			2960	probit analysis	Sriganganagar 2007	LC50	LC50	Cry2Ab	Cry2Ab	4.05	µg/g	1000	4050			2,06–9,03				1,03 ± 0,27	0.39
183	Kranthi, S,, Dhawad, C, S,, Naidu, S,, Bharose, A,, Chaudhary, A,, Sangode, V,, Nehare, S, K,, Bajaj, S, R,, & Kranthi, K, R,	2009	Crop Protection, 28(5): 371-375	Susceptibility of the cotton bollworm, Helicoverpa armigera (Hubner) (Lepidoptera: Noctuidae) to the Bacillus thuringiensis toxin Cry2Ab before and after the introduction of Bollgard-II	y	India	Lepidoptera	Noctuidae	Helicoverpa	Helicoverpa armigera	F1	one-day old larvae	incorporation	6 d		5			2960	probit analysis	Nanded 2007	LC50	LC50	Cry2Ab	Cry2Ab	33.55	µg/g	1000	33550			26,62–132,00				0,62 ± 0,20	0.21
183	Kranthi, S,, Dhawad, C, S,, Naidu, S,, Bharose, A,, Chaudhary, A,, Sangode, V,, Nehare, S, K,, Bajaj, S, R,, & Kranthi, K, R,	2009	Crop Protection, 28(5): 371-375	Susceptibility of the cotton bollworm, Helicoverpa armigera (Hubner) (Lepidoptera: Noctuidae) to the Bacillus thuringiensis toxin Cry2Ab before and after the introduction of Bollgard-II	y	India	Lepidoptera	Noctuidae	Helicoverpa	Helicoverpa armigera	F1	one-day old larvae	incorporation	6 d		5			2960	probit analysis	Bharuch 2007	LC50	LC50	Cry2Ab	Cry2Ab	11.24	µg/g	1000	11240			4,29–65,70				0,61 ± 0,15	0.43
183	Kranthi, S,, Dhawad, C, S,, Naidu, S,, Bharose, A,, Chaudhary, A,, Sangode, V,, Nehare, S, K,, Bajaj, S, R,, & Kranthi, K, R,	2009	Crop Protection, 28(5): 371-375	Susceptibility of the cotton bollworm, Helicoverpa armigera (Hubner) (Lepidoptera: Noctuidae) to the Bacillus thuringiensis toxin Cry2Ab before and after the introduction of Bollgard-II	y	India	Lepidoptera	Noctuidae	Helicoverpa	Helicoverpa armigera	F1	one-day old larvae	incorporation	6 d		5			2960	probit analysis	Vadodara 2007	LC50	LC50	Cry2Ab	Cry2Ab	21.64	µg/g	1000	21640			8,88–315,60				1,02 ± 0,39	0.32
183	Kranthi, S,, Dhawad, C, S,, Naidu, S,, Bharose, A,, Chaudhary, A,, Sangode, V,, Nehare, S, K,, Bajaj, S, R,, & Kranthi, K, R,	2009	Crop Protection, 28(5): 371-375	Susceptibility of the cotton bollworm, Helicoverpa armigera (Hubner) (Lepidoptera: Noctuidae) to the Bacillus thuringiensis toxin Cry2Ab before and after the introduction of Bollgard-II	y	India	Lepidoptera	Noctuidae	Helicoverpa	Helicoverpa armigera	F1	one-day old larvae	incorporation	6 d		5			2960	probit analysis	Surat 2007	LC50	LC50	Cry2Ab	Cry2Ab	28.53	µg/g	1000	28530			11,86–554,8				0,99 ± 0,39	0.34
183	Kranthi, S,, Dhawad, C, S,, Naidu, S,, Bharose, A,, Chaudhary, A,, Sangode, V,, Nehare, S, K,, Bajaj, S, R,, & Kranthi, K, R,	2009	Crop Protection, 28(5): 371-375	Susceptibility of the cotton bollworm, Helicoverpa armigera (Hubner) (Lepidoptera: Noctuidae) to the Bacillus thuringiensis toxin Cry2Ab before and after the introduction of Bollgard-II	y	India	Lepidoptera	Noctuidae	Helicoverpa	Helicoverpa armigera	F1	one-day old larvae	incorporation	6 d		5			2960	probit analysis	Surendranagar 2007	LC50	LC50	Cry2Ab	Cry2Ab	20.68	µg/g	1000	20680			8,78–126,95				0,86 ± 0,23	0.52
183	Kranthi, S,, Dhawad, C, S,, Naidu, S,, Bharose, A,, Chaudhary, A,, Sangode, V,, Nehare, S, K,, Bajaj, S, R,, & Kranthi, K, R,	2009	Crop Protection, 28(5): 371-375	Susceptibility of the cotton bollworm, Helicoverpa armigera (Hubner) (Lepidoptera: Noctuidae) to the Bacillus thuringiensis toxin Cry2Ab before and after the introduction of Bollgard-II	y	India	Lepidoptera	Noctuidae	Helicoverpa	Helicoverpa armigera	F1	one-day old larvae	incorporation	6 d		5			2960	probit analysis	Amreli 2007	LC50	LC50	Cry2Ab	Cry2Ab	20.97	µg/g	1000	20970			11,00–538,60				0,96 ± 0,11	0.98
183	Kranthi, S,, Dhawad, C, S,, Naidu, S,, Bharose, A,, Chaudhary, A,, Sangode, V,, Nehare, S, K,, Bajaj, S, R,, & Kranthi, K, R,	2009	Crop Protection, 28(5): 371-375	Susceptibility of the cotton bollworm, Helicoverpa armigera (Hubner) (Lepidoptera: Noctuidae) to the Bacillus thuringiensis toxin Cry2Ab before and after the introduction of Bollgard-II	y	India	Lepidoptera	Noctuidae	Helicoverpa	Helicoverpa armigera	F1	one-day old larvae	incorporation	6 d		5			2960	probit analysis	Wardha 2007	LC50	LC50	Cry2Ab	Cry2Ab	4.11	µg/g	1000	4110			1,84–10,46				2,00 ± 0,34	2.06
183	Kranthi, S,, Dhawad, C, S,, Naidu, S,, Bharose, A,, Chaudhary, A,, Sangode, V,, Nehare, S, K,, Bajaj, S, R,, & Kranthi, K, R,	2009	Crop Protection, 28(5): 371-375	Susceptibility of the cotton bollworm, Helicoverpa armigera (Hubner) (Lepidoptera: Noctuidae) to the Bacillus thuringiensis toxin Cry2Ab before and after the introduction of Bollgard-II	y	India	Lepidoptera	Noctuidae	Helicoverpa	Helicoverpa armigera	F1	one-day old larvae	incorporation	6 d		5			2960	probit analysis	Hingoli 2007	LC50	LC50	Cry2Ab	Cry2Ab	4.49	µg/g	1000	4490			2,60–8,60				1,28 ± 0,32	0.76
183	Kranthi, S,, Dhawad, C, S,, Naidu, S,, Bharose, A,, Chaudhary, A,, Sangode, V,, Nehare, S, K,, Bajaj, S, R,, & Kranthi, K, R,	2009	Crop Protection, 28(5): 371-375	Susceptibility of the cotton bollworm, Helicoverpa armigera (Hubner) (Lepidoptera: Noctuidae) to the Bacillus thuringiensis toxin Cry2Ab before and after the introduction of Bollgard-II	y	India	Lepidoptera	Noctuidae	Helicoverpa	Helicoverpa armigera	F1	one-day old larvae	incorporation	6 d		5			2960	probit analysis	Parbhani 2007	LC50	LC50	Cry2Ab	Cry2Ab	3.69	µg/g	1000	3690			0,90–174,40				0,78 ± 0,16	2.11
183	Kranthi, S,, Dhawad, C, S,, Naidu, S,, Bharose, A,, Chaudhary, A,, Sangode, V,, Nehare, S, K,, Bajaj, S, R,, & Kranthi, K, R,	2009	Crop Protection, 28(5): 371-375	Susceptibility of the cotton bollworm, Helicoverpa armigera (Hubner) (Lepidoptera: Noctuidae) to the Bacillus thuringiensis toxin Cry2Ab before and after the introduction of Bollgard-II	y	India	Lepidoptera	Noctuidae	Helicoverpa	Helicoverpa armigera	F1	one-day old larvae	incorporation	6 d		5			2960	probit analysis	Nagpur 2007	LC50	LC50	Cry2Ab	Cry2Ab	2.81	µg/g	1000	2810			1,63–5,43				1,10 ± 0,20	0.33
183	Kranthi, S,, Dhawad, C, S,, Naidu, S,, Bharose, A,, Chaudhary, A,, Sangode, V,, Nehare, S, K,, Bajaj, S, R,, & Kranthi, K, R,	2009	Crop Protection, 28(5): 371-375	Susceptibility of the cotton bollworm, Helicoverpa armigera (Hubner) (Lepidoptera: Noctuidae) to the Bacillus thuringiensis toxin Cry2Ab before and after the introduction of Bollgard-II	y	India	Lepidoptera	Noctuidae	Helicoverpa	Helicoverpa armigera	F1	one-day old larvae	incorporation	6 d		5			2960	probit analysis	Rajkot 2007	LC50	LC50	Cry2Ab	Cry2Ab	29.79	µg/g	1000	29790			7,35–4222,00				0,73 ± 0,19	1.05
183	Kranthi, S,, Dhawad, C, S,, Naidu, S,, Bharose, A,, Chaudhary, A,, Sangode, V,, Nehare, S, K,, Bajaj, S, R,, & Kranthi, K, R,	2009	Crop Protection, 28(5): 371-375	Susceptibility of the cotton bollworm, Helicoverpa armigera (Hubner) (Lepidoptera: Noctuidae) to the Bacillus thuringiensis toxin Cry2Ab before and after the introduction of Bollgard-II	y	India	Lepidoptera	Noctuidae	Helicoverpa	Helicoverpa armigera	F1	one-day old larvae	incorporation	6 d		5			2960	probit analysis	Beed 2007	LC50	LC50	Cry2Ab	Cry2Ab	12.56	µg/g	1000	12560			7,35–28,13				1,42 ± 0,32	0.15
183	Kranthi, S,, Dhawad, C, S,, Naidu, S,, Bharose, A,, Chaudhary, A,, Sangode, V,, Nehare, S, K,, Bajaj, S, R,, & Kranthi, K, R,	2009	Crop Protection, 28(5): 371-375	Susceptibility of the cotton bollworm, Helicoverpa armigera (Hubner) (Lepidoptera: Noctuidae) to the Bacillus thuringiensis toxin Cry2Ab before and after the introduction of Bollgard-II	y	India	Lepidoptera	Noctuidae	Helicoverpa	Helicoverpa armigera	F1	one-day old larvae	incorporation	6 d		5			2960	probit analysis	Buldana 2007	LC50	LC50	Cry2Ab	Cry2Ab	6.28	µg/g	1000	6280			2,73–21,52				0,62 ± 0,14	0.13
183	Kranthi, S,, Dhawad, C, S,, Naidu, S,, Bharose, A,, Chaudhary, A,, Sangode, V,, Nehare, S, K,, Bajaj, S, R,, & Kranthi, K, R,	2009	Crop Protection, 28(5): 371-375	Susceptibility of the cotton bollworm, Helicoverpa armigera (Hubner) (Lepidoptera: Noctuidae) to the Bacillus thuringiensis toxin Cry2Ab before and after the introduction of Bollgard-II	y	India	Lepidoptera	Noctuidae	Helicoverpa	Helicoverpa armigera	F1	one-day old larvae	incorporation	6 d		5			2960	probit analysis	Saoner 2007	LC50	LC50	Cry2Ab	Cry2Ab	5.99	µg/g	1000	5990			1,42–132,96				0,42 ± 0,15	0.5
183	Kranthi, S,, Dhawad, C, S,, Naidu, S,, Bharose, A,, Chaudhary, A,, Sangode, V,, Nehare, S, K,, Bajaj, S, R,, & Kranthi, K, R,	2009	Crop Protection, 28(5): 371-375	Susceptibility of the cotton bollworm, Helicoverpa armigera (Hubner) (Lepidoptera: Noctuidae) to the Bacillus thuringiensis toxin Cry2Ab before and after the introduction of Bollgard-II	y	India	Lepidoptera	Noctuidae	Helicoverpa	Helicoverpa armigera	F1	one-day old larvae	incorporation	6 d		5			2960	probit analysis	Latur 2007	LC50	LC50	Cry2Ab	Cry2Ab	5.27	µg/g	1000	5270			3,07–10,89				1,06 ± 0,20	0.08
183	Kranthi, S,, Dhawad, C, S,, Naidu, S,, Bharose, A,, Chaudhary, A,, Sangode, V,, Nehare, S, K,, Bajaj, S, R,, & Kranthi, K, R,	2009	Crop Protection, 28(5): 371-375	Susceptibility of the cotton bollworm, Helicoverpa armigera (Hubner) (Lepidoptera: Noctuidae) to the Bacillus thuringiensis toxin Cry2Ab before and after the introduction of Bollgard-II	y	India	Lepidoptera	Noctuidae	Helicoverpa	Helicoverpa armigera	F1	one-day old larvae	incorporation	6 d		5			2960	probit analysis	Akola 2007	LC50	LC50	Cry2Ab	Cry2Ab	4.47	µg/g	1000	4470			2,54–9,74				1,01 ± 0,21	0.91
183	Kranthi, S,, Dhawad, C, S,, Naidu, S,, Bharose, A,, Chaudhary, A,, Sangode, V,, Nehare, S, K,, Bajaj, S, R,, & Kranthi, K, R,	2009	Crop Protection, 28(5): 371-375	Susceptibility of the cotton bollworm, Helicoverpa armigera (Hubner) (Lepidoptera: Noctuidae) to the Bacillus thuringiensis toxin Cry2Ab before and after the introduction of Bollgard-II	y	India	Lepidoptera	Noctuidae	Helicoverpa	Helicoverpa armigera	F1	one-day old larvae	incorporation	6 d		5			2960	probit analysis	Guntur	IC50	EC50	Cry2Ab	Cry2Ab	1.26	µg/g	1000	1260
183	Kranthi, S,, Dhawad, C, S,, Naidu, S,, Bharose, A,, Chaudhary, A,, Sangode, V,, Nehare, S, K,, Bajaj, S, R,, & Kranthi, K, R,	2009	Crop Protection, 28(5): 371-375	Susceptibility of the cotton bollworm, Helicoverpa armigera (Hubner) (Lepidoptera: Noctuidae) to the Bacillus thuringiensis toxin Cry2Ab before and after the introduction of Bollgard-II	y	India	Lepidoptera	Noctuidae	Helicoverpa	Helicoverpa armigera	F1	one-day old larvae	incorporation	6 d		5			2960	probit analysis	Warangal 2005	IC50	EC50	Cry2Ab	Cry2Ab	1.57	µg/g	1000	1570
183	Kranthi, S,, Dhawad, C, S,, Naidu, S,, Bharose, A,, Chaudhary, A,, Sangode, V,, Nehare, S, K,, Bajaj, S, R,, & Kranthi, K, R,	2009	Crop Protection, 28(5): 371-375	Susceptibility of the cotton bollworm, Helicoverpa armigera (Hubner) (Lepidoptera: Noctuidae) to the Bacillus thuringiensis toxin Cry2Ab before and after the introduction of Bollgard-II	y	India	Lepidoptera	Noctuidae	Helicoverpa	Helicoverpa armigera	F1	one-day old larvae	incorporation	6 d		5			2960	probit analysis	Karimnagar 2005	IC50	EC50	Cry2Ab	Cry2Ab	0.59	µg/g	1000	590
183	Kranthi, S,, Dhawad, C, S,, Naidu, S,, Bharose, A,, Chaudhary, A,, Sangode, V,, Nehare, S, K,, Bajaj, S, R,, & Kranthi, K, R,	2009	Crop Protection, 28(5): 371-375	Susceptibility of the cotton bollworm, Helicoverpa armigera (Hubner) (Lepidoptera: Noctuidae) to the Bacillus thuringiensis toxin Cry2Ab before and after the introduction of Bollgard-II	y	India	Lepidoptera	Noctuidae	Helicoverpa	Helicoverpa armigera	F1	one-day old larvae	incorporation	6 d		5			2960	probit analysis	Khammam 2005	IC50	EC50	Cry2Ab	Cry2Ab	0.45	µg/g	1000	450
183	Kranthi, S,, Dhawad, C, S,, Naidu, S,, Bharose, A,, Chaudhary, A,, Sangode, V,, Nehare, S, K,, Bajaj, S, R,, & Kranthi, K, R,	2009	Crop Protection, 28(5): 371-375	Susceptibility of the cotton bollworm, Helicoverpa armigera (Hubner) (Lepidoptera: Noctuidae) to the Bacillus thuringiensis toxin Cry2Ab before and after the introduction of Bollgard-II	y	India	Lepidoptera	Noctuidae	Helicoverpa	Helicoverpa armigera	F1	one-day old larvae	incorporation	6 d		5			2960	probit analysis	Dharwad 2005	IC50	EC50	Cry2Ab	Cry2Ab	0.92	µg/g	1000	920
183	Kranthi, S,, Dhawad, C, S,, Naidu, S,, Bharose, A,, Chaudhary, A,, Sangode, V,, Nehare, S, K,, Bajaj, S, R,, & Kranthi, K, R,	2009	Crop Protection, 28(5): 371-375	Susceptibility of the cotton bollworm, Helicoverpa armigera (Hubner) (Lepidoptera: Noctuidae) to the Bacillus thuringiensis toxin Cry2Ab before and after the introduction of Bollgard-II	y	India	Lepidoptera	Noctuidae	Helicoverpa	Helicoverpa armigera	F1	one-day old larvae	incorporation	6 d		5			2960	probit analysis	Coimbatore 2005	IC50	EC50	Cry2Ab	Cry2Ab	0.69	µg/g	1000	690
183	Kranthi, S,, Dhawad, C, S,, Naidu, S,, Bharose, A,, Chaudhary, A,, Sangode, V,, Nehare, S, K,, Bajaj, S, R,, & Kranthi, K, R,	2009	Crop Protection, 28(5): 371-375	Susceptibility of the cotton bollworm, Helicoverpa armigera (Hubner) (Lepidoptera: Noctuidae) to the Bacillus thuringiensis toxin Cry2Ab before and after the introduction of Bollgard-II	y	India	Lepidoptera	Noctuidae	Helicoverpa	Helicoverpa armigera	F1	one-day old larvae	incorporation	6 d		5			2960	probit analysis	Abohar 2005	IC50	EC50	Cry2Ab	Cry2Ab	0.83	µg/g	1000	830
183	Kranthi, S,, Dhawad, C, S,, Naidu, S,, Bharose, A,, Chaudhary, A,, Sangode, V,, Nehare, S, K,, Bajaj, S, R,, & Kranthi, K, R,	2009	Crop Protection, 28(5): 371-375	Susceptibility of the cotton bollworm, Helicoverpa armigera (Hubner) (Lepidoptera: Noctuidae) to the Bacillus thuringiensis toxin Cry2Ab before and after the introduction of Bollgard-II	y	India	Lepidoptera	Noctuidae	Helicoverpa	Helicoverpa armigera	F1	one-day old larvae	incorporation	6 d		5			2960	probit analysis	Hissar 2005	IC50	EC50	Cry2Ab	Cry2Ab	0.84	µg/g	1000	840
183	Kranthi, S,, Dhawad, C, S,, Naidu, S,, Bharose, A,, Chaudhary, A,, Sangode, V,, Nehare, S, K,, Bajaj, S, R,, & Kranthi, K, R,	2009	Crop Protection, 28(5): 371-375	Susceptibility of the cotton bollworm, Helicoverpa armigera (Hubner) (Lepidoptera: Noctuidae) to the Bacillus thuringiensis toxin Cry2Ab before and after the introduction of Bollgard-II	y	India	Lepidoptera	Noctuidae	Helicoverpa	Helicoverpa armigera	F1	one-day old larvae	incorporation	6 d		5			2960	probit analysis	Fatehabad 2005	IC50	EC50	Cry2Ab	Cry2Ab	1.1	µg/g	1000	1100
183	Kranthi, S,, Dhawad, C, S,, Naidu, S,, Bharose, A,, Chaudhary, A,, Sangode, V,, Nehare, S, K,, Bajaj, S, R,, & Kranthi, K, R,	2009	Crop Protection, 28(5): 371-375	Susceptibility of the cotton bollworm, Helicoverpa armigera (Hubner) (Lepidoptera: Noctuidae) to the Bacillus thuringiensis toxin Cry2Ab before and after the introduction of Bollgard-II	y	India	Lepidoptera	Noctuidae	Helicoverpa	Helicoverpa armigera	F1	one-day old larvae	incorporation	6 d		5			2960	probit analysis	Sriganganagar 2005	IC50	EC50	Cry2Ab	Cry2Ab	0.75	µg/g	1000	750
183	Kranthi, S,, Dhawad, C, S,, Naidu, S,, Bharose, A,, Chaudhary, A,, Sangode, V,, Nehare, S, K,, Bajaj, S, R,, & Kranthi, K, R,	2009	Crop Protection, 28(5): 371-375	Susceptibility of the cotton bollworm, Helicoverpa armigera (Hubner) (Lepidoptera: Noctuidae) to the Bacillus thuringiensis toxin Cry2Ab before and after the introduction of Bollgard-II	y	India	Lepidoptera	Noctuidae	Helicoverpa	Helicoverpa armigera	F1	one-day old larvae	incorporation	6 d		5			2960	probit analysis	Sirsa 2005	IC50	EC50	Cry2Ab	Cry2Ab	0.88	µg/g	1000	880
183	Kranthi, S,, Dhawad, C, S,, Naidu, S,, Bharose, A,, Chaudhary, A,, Sangode, V,, Nehare, S, K,, Bajaj, S, R,, & Kranthi, K, R,	2009	Crop Protection, 28(5): 371-375	Susceptibility of the cotton bollworm, Helicoverpa armigera (Hubner) (Lepidoptera: Noctuidae) to the Bacillus thuringiensis toxin Cry2Ab before and after the introduction of Bollgard-II	y	India	Lepidoptera	Noctuidae	Helicoverpa	Helicoverpa armigera	F1	one-day old larvae	incorporation	6 d		5			2960	probit analysis	Hanumangarh 2005	IC50	EC50	Cry2Ab	Cry2Ab	1.04	µg/g	1000	1040
183	Kranthi, S,, Dhawad, C, S,, Naidu, S,, Bharose, A,, Chaudhary, A,, Sangode, V,, Nehare, S, K,, Bajaj, S, R,, & Kranthi, K, R,	2009	Crop Protection, 28(5): 371-375	Susceptibility of the cotton bollworm, Helicoverpa armigera (Hubner) (Lepidoptera: Noctuidae) to the Bacillus thuringiensis toxin Cry2Ab before and after the introduction of Bollgard-II	y	India	Lepidoptera	Noctuidae	Helicoverpa	Helicoverpa armigera	F1	one-day old larvae	incorporation	6 d		5			2960	probit analysis	Mansa 2005	IC50	EC50	Cry2Ab	Cry2Ab	2.05	µg/g	1000	2050
183	Kranthi, S,, Dhawad, C, S,, Naidu, S,, Bharose, A,, Chaudhary, A,, Sangode, V,, Nehare, S, K,, Bajaj, S, R,, & Kranthi, K, R,	2009	Crop Protection, 28(5): 371-375	Susceptibility of the cotton bollworm, Helicoverpa armigera (Hubner) (Lepidoptera: Noctuidae) to the Bacillus thuringiensis toxin Cry2Ab before and after the introduction of Bollgard-II	y	India	Lepidoptera	Noctuidae	Helicoverpa	Helicoverpa armigera	F1	one-day old larvae	incorporation	6 d		5			2960	probit analysis	Bhatinda 2005	IC50	EC50	Cry2Ab	Cry2Ab	2.3	µg/g	1000	2300
183	Kranthi, S,, Dhawad, C, S,, Naidu, S,, Bharose, A,, Chaudhary, A,, Sangode, V,, Nehare, S, K,, Bajaj, S, R,, & Kranthi, K, R,	2009	Crop Protection, 28(5): 371-375	Susceptibility of the cotton bollworm, Helicoverpa armigera (Hubner) (Lepidoptera: Noctuidae) to the Bacillus thuringiensis toxin Cry2Ab before and after the introduction of Bollgard-II	y	India	Lepidoptera	Noctuidae	Helicoverpa	Helicoverpa armigera	F1	one-day old larvae	incorporation	6 d		5			2960	probit analysis	Bharuch 2005	IC50	EC50	Cry2Ab	Cry2Ab	0.31	µg/g	1000	310
183	Kranthi, S,, Dhawad, C, S,, Naidu, S,, Bharose, A,, Chaudhary, A,, Sangode, V,, Nehare, S, K,, Bajaj, S, R,, & Kranthi, K, R,	2009	Crop Protection, 28(5): 371-375	Susceptibility of the cotton bollworm, Helicoverpa armigera (Hubner) (Lepidoptera: Noctuidae) to the Bacillus thuringiensis toxin Cry2Ab before and after the introduction of Bollgard-II	y	India	Lepidoptera	Noctuidae	Helicoverpa	Helicoverpa armigera	F1	one-day old larvae	incorporation	6 d		5			2960	probit analysis	Vadodara 2005	IC50	EC50	Cry2Ab	Cry2Ab	0.45	µg/g	1000	450
183	Kranthi, S,, Dhawad, C, S,, Naidu, S,, Bharose, A,, Chaudhary, A,, Sangode, V,, Nehare, S, K,, Bajaj, S, R,, & Kranthi, K, R,	2009	Crop Protection, 28(5): 371-375	Susceptibility of the cotton bollworm, Helicoverpa armigera (Hubner) (Lepidoptera: Noctuidae) to the Bacillus thuringiensis toxin Cry2Ab before and after the introduction of Bollgard-II	y	India	Lepidoptera	Noctuidae	Helicoverpa	Helicoverpa armigera	F1	one-day old larvae	incorporation	6 d		5			2960	probit analysis	Surat 2005	IC50	EC50	Cry2Ab	Cry2Ab	0.45	µg/g	1000	450
183	Kranthi, S,, Dhawad, C, S,, Naidu, S,, Bharose, A,, Chaudhary, A,, Sangode, V,, Nehare, S, K,, Bajaj, S, R,, & Kranthi, K, R,	2009	Crop Protection, 28(5): 371-375	Susceptibility of the cotton bollworm, Helicoverpa armigera (Hubner) (Lepidoptera: Noctuidae) to the Bacillus thuringiensis toxin Cry2Ab before and after the introduction of Bollgard-II	y	India	Lepidoptera	Noctuidae	Helicoverpa	Helicoverpa armigera	F1	one-day old larvae	incorporation	6 d		5			2960	probit analysis	Surendranagar 2005	IC50	EC50	Cry2Ab	Cry2Ab	1.05	µg/g	1000	1050
183	Kranthi, S,, Dhawad, C, S,, Naidu, S,, Bharose, A,, Chaudhary, A,, Sangode, V,, Nehare, S, K,, Bajaj, S, R,, & Kranthi, K, R,	2009	Crop Protection, 28(5): 371-375	Susceptibility of the cotton bollworm, Helicoverpa armigera (Hubner) (Lepidoptera: Noctuidae) to the Bacillus thuringiensis toxin Cry2Ab before and after the introduction of Bollgard-II	y	India	Lepidoptera	Noctuidae	Helicoverpa	Helicoverpa armigera	F1	one-day old larvae	incorporation	6 d		5			2960	probit analysis	Amreli 2005	IC50	EC50	Cry2Ab	Cry2Ab	0.67	µg/g	1000	670
183	Kranthi, S,, Dhawad, C, S,, Naidu, S,, Bharose, A,, Chaudhary, A,, Sangode, V,, Nehare, S, K,, Bajaj, S, R,, & Kranthi, K, R,	2009	Crop Protection, 28(5): 371-375	Susceptibility of the cotton bollworm, Helicoverpa armigera (Hubner) (Lepidoptera: Noctuidae) to the Bacillus thuringiensis toxin Cry2Ab before and after the introduction of Bollgard-II	y	India	Lepidoptera	Noctuidae	Helicoverpa	Helicoverpa armigera	F1	one-day old larvae	incorporation	6 d		5			2960	probit analysis	Wardha 2005	IC50	EC50	Cry2Ab	Cry2Ab	0.79	µg/g	1000	790
183	Kranthi, S,, Dhawad, C, S,, Naidu, S,, Bharose, A,, Chaudhary, A,, Sangode, V,, Nehare, S, K,, Bajaj, S, R,, & Kranthi, K, R,	2009	Crop Protection, 28(5): 371-375	Susceptibility of the cotton bollworm, Helicoverpa armigera (Hubner) (Lepidoptera: Noctuidae) to the Bacillus thuringiensis toxin Cry2Ab before and after the introduction of Bollgard-II	y	India	Lepidoptera	Noctuidae	Helicoverpa	Helicoverpa armigera	F1	one-day old larvae	incorporation	6 d		5			2960	probit analysis	Aurangabad 2005	IC50	EC50	Cry2Ab	Cry2Ab	0.5	µg/g	1000	500
183	Kranthi, S,, Dhawad, C, S,, Naidu, S,, Bharose, A,, Chaudhary, A,, Sangode, V,, Nehare, S, K,, Bajaj, S, R,, & Kranthi, K, R,	2009	Crop Protection, 28(5): 371-375	Susceptibility of the cotton bollworm, Helicoverpa armigera (Hubner) (Lepidoptera: Noctuidae) to the Bacillus thuringiensis toxin Cry2Ab before and after the introduction of Bollgard-II	y	India	Lepidoptera	Noctuidae	Helicoverpa	Helicoverpa armigera	F1	one-day old larvae	incorporation	6 d		5			2960	probit analysis	Chindwara 2005	IC50	EC50	Cry2Ab	Cry2Ab	1.11	µg/g	1000	1110
183	Kranthi, S,, Dhawad, C, S,, Naidu, S,, Bharose, A,, Chaudhary, A,, Sangode, V,, Nehare, S, K,, Bajaj, S, R,, & Kranthi, K, R,	2009	Crop Protection, 28(5): 371-375	Susceptibility of the cotton bollworm, Helicoverpa armigera (Hubner) (Lepidoptera: Noctuidae) to the Bacillus thuringiensis toxin Cry2Ab before and after the introduction of Bollgard-II	y	India	Lepidoptera	Noctuidae	Helicoverpa	Helicoverpa armigera	F1	one-day old larvae	incorporation	6 d		5			2960	probit analysis	Hingoli 2005	IC50	EC50	Cry2Ab	Cry2Ab	0.97	µg/g	1000	970
183	Kranthi, S,, Dhawad, C, S,, Naidu, S,, Bharose, A,, Chaudhary, A,, Sangode, V,, Nehare, S, K,, Bajaj, S, R,, & Kranthi, K, R,	2009	Crop Protection, 28(5): 371-375	Susceptibility of the cotton bollworm, Helicoverpa armigera (Hubner) (Lepidoptera: Noctuidae) to the Bacillus thuringiensis toxin Cry2Ab before and after the introduction of Bollgard-II	y	India	Lepidoptera	Noctuidae	Helicoverpa	Helicoverpa armigera	F1	one-day old larvae	incorporation	6 d		5			2960	probit analysis	Parbhani 2005	IC50	EC50	Cry2Ab	Cry2Ab	1.31	µg/g	1000	1310
183	Kranthi, S,, Dhawad, C, S,, Naidu, S,, Bharose, A,, Chaudhary, A,, Sangode, V,, Nehare, S, K,, Bajaj, S, R,, & Kranthi, K, R,	2009	Crop Protection, 28(5): 371-375	Susceptibility of the cotton bollworm, Helicoverpa armigera (Hubner) (Lepidoptera: Noctuidae) to the Bacillus thuringiensis toxin Cry2Ab before and after the introduction of Bollgard-II	y	India	Lepidoptera	Noctuidae	Helicoverpa	Helicoverpa armigera	F1	one-day old larvae	incorporation	6 d		5			2960	probit analysis	Nagpur 2005	IC50	EC50	Cry2Ab	Cry2Ab	1.24	µg/g	1000	1240
183	Kranthi, S,, Dhawad, C, S,, Naidu, S,, Bharose, A,, Chaudhary, A,, Sangode, V,, Nehare, S, K,, Bajaj, S, R,, & Kranthi, K, R,	2009	Crop Protection, 28(5): 371-375	Susceptibility of the cotton bollworm, Helicoverpa armigera (Hubner) (Lepidoptera: Noctuidae) to the Bacillus thuringiensis toxin Cry2Ab before and after the introduction of Bollgard-II	y	India	Lepidoptera	Noctuidae	Helicoverpa	Helicoverpa armigera	F1	one-day old larvae	incorporation	6 d		5			2960	probit analysis	Warangal 2007	IC50	EC50	Cry2Ab	Cry2Ab	0.52	µg/g	1000	520														y			y
183	Kranthi, S,, Dhawad, C, S,, Naidu, S,, Bharose, A,, Chaudhary, A,, Sangode, V,, Nehare, S, K,, Bajaj, S, R,, & Kranthi, K, R,	2009	Crop Protection, 28(5): 371-375	Susceptibility of the cotton bollworm, Helicoverpa armigera (Hubner) (Lepidoptera: Noctuidae) to the Bacillus thuringiensis toxin Cry2Ab before and after the introduction of Bollgard-II	y	India	Lepidoptera	Noctuidae	Helicoverpa	Helicoverpa armigera	F1	one-day old larvae	incorporation	6 d		5			2960	probit analysis	Khammam 2007	IC50	EC50	Cry2Ab	Cry2Ab	0.58	µg/g	1000	580
183	Kranthi, S,, Dhawad, C, S,, Naidu, S,, Bharose, A,, Chaudhary, A,, Sangode, V,, Nehare, S, K,, Bajaj, S, R,, & Kranthi, K, R,	2009	Crop Protection, 28(5): 371-375	Susceptibility of the cotton bollworm, Helicoverpa armigera (Hubner) (Lepidoptera: Noctuidae) to the Bacillus thuringiensis toxin Cry2Ab before and after the introduction of Bollgard-II	y	India	Lepidoptera	Noctuidae	Helicoverpa	Helicoverpa armigera	F1	one-day old larvae	incorporation	6 d		5			2960	probit analysis	Dharwad 2007	IC50	EC50	Cry2Ab	Cry2Ab	3.15	µg/g	1000	3150
183	Kranthi, S,, Dhawad, C, S,, Naidu, S,, Bharose, A,, Chaudhary, A,, Sangode, V,, Nehare, S, K,, Bajaj, S, R,, & Kranthi, K, R,	2009	Crop Protection, 28(5): 371-375	Susceptibility of the cotton bollworm, Helicoverpa armigera (Hubner) (Lepidoptera: Noctuidae) to the Bacillus thuringiensis toxin Cry2Ab before and after the introduction of Bollgard-II	y	India	Lepidoptera	Noctuidae	Helicoverpa	Helicoverpa armigera	F1	one-day old larvae	incorporation	6 d		5			2960	probit analysis	Rangareddy 2007	IC50	EC50	Cry2Ab	Cry2Ab	1.57	µg/g	1000	1570
183	Kranthi, S,, Dhawad, C, S,, Naidu, S,, Bharose, A,, Chaudhary, A,, Sangode, V,, Nehare, S, K,, Bajaj, S, R,, & Kranthi, K, R,	2009	Crop Protection, 28(5): 371-375	Susceptibility of the cotton bollworm, Helicoverpa armigera (Hubner) (Lepidoptera: Noctuidae) to the Bacillus thuringiensis toxin Cry2Ab before and after the introduction of Bollgard-II	y	India	Lepidoptera	Noctuidae	Helicoverpa	Helicoverpa armigera	F1	one-day old larvae	incorporation	6 d		5			2960	probit analysis	Fatehabad 2007	IC50	EC50	Cry2Ab	Cry2Ab	2.24	µg/g	1000	2240
183	Kranthi, S,, Dhawad, C, S,, Naidu, S,, Bharose, A,, Chaudhary, A,, Sangode, V,, Nehare, S, K,, Bajaj, S, R,, & Kranthi, K, R,	2009	Crop Protection, 28(5): 371-375	Susceptibility of the cotton bollworm, Helicoverpa armigera (Hubner) (Lepidoptera: Noctuidae) to the Bacillus thuringiensis toxin Cry2Ab before and after the introduction of Bollgard-II	y	India	Lepidoptera	Noctuidae	Helicoverpa	Helicoverpa armigera	F1	one-day old larvae	incorporation	6 d		5			2960	probit analysis	Sriganganagar 2007	IC50	EC50	Cry2Ab	Cry2Ab	0.82	µg/g	1000	820
183	Kranthi, S,, Dhawad, C, S,, Naidu, S,, Bharose, A,, Chaudhary, A,, Sangode, V,, Nehare, S, K,, Bajaj, S, R,, & Kranthi, K, R,	2009	Crop Protection, 28(5): 371-375	Susceptibility of the cotton bollworm, Helicoverpa armigera (Hubner) (Lepidoptera: Noctuidae) to the Bacillus thuringiensis toxin Cry2Ab before and after the introduction of Bollgard-II	y	India	Lepidoptera	Noctuidae	Helicoverpa	Helicoverpa armigera	F1	one-day old larvae	incorporation	6 d		5			2960	probit analysis	Nanded 2007	IC50	EC50	Cry2Ab	Cry2Ab	1.13	µg/g	1000	1130
183	Kranthi, S,, Dhawad, C, S,, Naidu, S,, Bharose, A,, Chaudhary, A,, Sangode, V,, Nehare, S, K,, Bajaj, S, R,, & Kranthi, K, R,	2009	Crop Protection, 28(5): 371-375	Susceptibility of the cotton bollworm, Helicoverpa armigera (Hubner) (Lepidoptera: Noctuidae) to the Bacillus thuringiensis toxin Cry2Ab before and after the introduction of Bollgard-II	y	India	Lepidoptera	Noctuidae	Helicoverpa	Helicoverpa armigera	F1	one-day old larvae	incorporation	6 d		5			2960	probit analysis	Bharuch 2007	IC50	EC50	Cry2Ab	Cry2Ab	1.53	µg/g	1000	1530
183	Kranthi, S,, Dhawad, C, S,, Naidu, S,, Bharose, A,, Chaudhary, A,, Sangode, V,, Nehare, S, K,, Bajaj, S, R,, & Kranthi, K, R,	2009	Crop Protection, 28(5): 371-375	Susceptibility of the cotton bollworm, Helicoverpa armigera (Hubner) (Lepidoptera: Noctuidae) to the Bacillus thuringiensis toxin Cry2Ab before and after the introduction of Bollgard-II	y	India	Lepidoptera	Noctuidae	Helicoverpa	Helicoverpa armigera	F1	one-day old larvae	incorporation	6 d		5			2960	probit analysis	Vadodara 2007	IC50	EC50	Cry2Ab	Cry2Ab	3.05	µg/g	1000	3050
183	Kranthi, S,, Dhawad, C, S,, Naidu, S,, Bharose, A,, Chaudhary, A,, Sangode, V,, Nehare, S, K,, Bajaj, S, R,, & Kranthi, K, R,	2009	Crop Protection, 28(5): 371-375	Susceptibility of the cotton bollworm, Helicoverpa armigera (Hubner) (Lepidoptera: Noctuidae) to the Bacillus thuringiensis toxin Cry2Ab before and after the introduction of Bollgard-II	y	India	Lepidoptera	Noctuidae	Helicoverpa	Helicoverpa armigera	F1	one-day old larvae	incorporation	6 d		5			2960	probit analysis	Surat 2007	IC50	EC50	Cry2Ab	Cry2Ab	0.24	µg/g	1000	240
183	Kranthi, S,, Dhawad, C, S,, Naidu, S,, Bharose, A,, Chaudhary, A,, Sangode, V,, Nehare, S, K,, Bajaj, S, R,, & Kranthi, K, R,	2009	Crop Protection, 28(5): 371-375	Susceptibility of the cotton bollworm, Helicoverpa armigera (Hubner) (Lepidoptera: Noctuidae) to the Bacillus thuringiensis toxin Cry2Ab before and after the introduction of Bollgard-II	y	India	Lepidoptera	Noctuidae	Helicoverpa	Helicoverpa armigera	F1	one-day old larvae	incorporation	6 d		5			2960	probit analysis	Surendranagar 2007	IC50	EC50	Cry2Ab	Cry2Ab	0.3	µg/g	1000	300
183	Kranthi, S,, Dhawad, C, S,, Naidu, S,, Bharose, A,, Chaudhary, A,, Sangode, V,, Nehare, S, K,, Bajaj, S, R,, & Kranthi, K, R,	2009	Crop Protection, 28(5): 371-375	Susceptibility of the cotton bollworm, Helicoverpa armigera (Hubner) (Lepidoptera: Noctuidae) to the Bacillus thuringiensis toxin Cry2Ab before and after the introduction of Bollgard-II	y	India	Lepidoptera	Noctuidae	Helicoverpa	Helicoverpa armigera	F1	one-day old larvae	incorporation	6 d		5			2960	probit analysis	Amreli 2007	IC50	EC50	Cry2Ab	Cry2Ab	1.55	µg/g	1000	1550
183	Kranthi, S,, Dhawad, C, S,, Naidu, S,, Bharose, A,, Chaudhary, A,, Sangode, V,, Nehare, S, K,, Bajaj, S, R,, & Kranthi, K, R,	2009	Crop Protection, 28(5): 371-375	Susceptibility of the cotton bollworm, Helicoverpa armigera (Hubner) (Lepidoptera: Noctuidae) to the Bacillus thuringiensis toxin Cry2Ab before and after the introduction of Bollgard-II	y	India	Lepidoptera	Noctuidae	Helicoverpa	Helicoverpa armigera	F1	one-day old larvae	incorporation	6 d		5			2960	probit analysis	Wardha 2007	IC50	EC50	Cry2Ab	Cry2Ab	0.52	µg/g	1000	520
183	Kranthi, S,, Dhawad, C, S,, Naidu, S,, Bharose, A,, Chaudhary, A,, Sangode, V,, Nehare, S, K,, Bajaj, S, R,, & Kranthi, K, R,	2009	Crop Protection, 28(5): 371-375	Susceptibility of the cotton bollworm, Helicoverpa armigera (Hubner) (Lepidoptera: Noctuidae) to the Bacillus thuringiensis toxin Cry2Ab before and after the introduction of Bollgard-II	y	India	Lepidoptera	Noctuidae	Helicoverpa	Helicoverpa armigera	F1	one-day old larvae	incorporation	6 d		5			2960	probit analysis	Hingoli 2007	IC50	EC50	Cry2Ab	Cry2Ab	3.4	µg/g	1000	3400
183	Kranthi, S,, Dhawad, C, S,, Naidu, S,, Bharose, A,, Chaudhary, A,, Sangode, V,, Nehare, S, K,, Bajaj, S, R,, & Kranthi, K, R,	2009	Crop Protection, 28(5): 371-375	Susceptibility of the cotton bollworm, Helicoverpa armigera (Hubner) (Lepidoptera: Noctuidae) to the Bacillus thuringiensis toxin Cry2Ab before and after the introduction of Bollgard-II	y	India	Lepidoptera	Noctuidae	Helicoverpa	Helicoverpa armigera	F1	one-day old larvae	incorporation	6 d		5			2960	probit analysis	Parbhani 2007	IC50	EC50	Cry2Ab	Cry2Ab	0.37	µg/g	1000	370
183	Kranthi, S,, Dhawad, C, S,, Naidu, S,, Bharose, A,, Chaudhary, A,, Sangode, V,, Nehare, S, K,, Bajaj, S, R,, & Kranthi, K, R,	2009	Crop Protection, 28(5): 371-375	Susceptibility of the cotton bollworm, Helicoverpa armigera (Hubner) (Lepidoptera: Noctuidae) to the Bacillus thuringiensis toxin Cry2Ab before and after the introduction of Bollgard-II	y	India	Lepidoptera	Noctuidae	Helicoverpa	Helicoverpa armigera	F1	one-day old larvae	incorporation	6 d		5			2960	probit analysis	Nagpur 2007	IC50	EC50	Cry2Ab	Cry2Ab	0.77	µg/g	1000	770
183	Kranthi, S,, Dhawad, C, S,, Naidu, S,, Bharose, A,, Chaudhary, A,, Sangode, V,, Nehare, S, K,, Bajaj, S, R,, & Kranthi, K, R,	2009	Crop Protection, 28(5): 371-375	Susceptibility of the cotton bollworm, Helicoverpa armigera (Hubner) (Lepidoptera: Noctuidae) to the Bacillus thuringiensis toxin Cry2Ab before and after the introduction of Bollgard-II	y	India	Lepidoptera	Noctuidae	Helicoverpa	Helicoverpa armigera	F1	one-day old larvae	incorporation	6 d		5			2960	probit analysis	Rajkot 2007	IC50	EC50	Cry2Ab	Cry2Ab	0.61	µg/g	1000	610
183	Kranthi, S,, Dhawad, C, S,, Naidu, S,, Bharose, A,, Chaudhary, A,, Sangode, V,, Nehare, S, K,, Bajaj, S, R,, & Kranthi, K, R,	2009	Crop Protection, 28(5): 371-375	Susceptibility of the cotton bollworm, Helicoverpa armigera (Hubner) (Lepidoptera: Noctuidae) to the Bacillus thuringiensis toxin Cry2Ab before and after the introduction of Bollgard-II	y	India	Lepidoptera	Noctuidae	Helicoverpa	Helicoverpa armigera	F1	one-day old larvae	incorporation	6 d		5			2960	probit analysis	Beed 2007	IC50	EC50	Cry2Ab	Cry2Ab	0.31	µg/g	1000	310
183	Kranthi, S,, Dhawad, C, S,, Naidu, S,, Bharose, A,, Chaudhary, A,, Sangode, V,, Nehare, S, K,, Bajaj, S, R,, & Kranthi, K, R,	2009	Crop Protection, 28(5): 371-375	Susceptibility of the cotton bollworm, Helicoverpa armigera (Hubner) (Lepidoptera: Noctuidae) to the Bacillus thuringiensis toxin Cry2Ab before and after the introduction of Bollgard-II	y	India	Lepidoptera	Noctuidae	Helicoverpa	Helicoverpa armigera	F1	one-day old larvae	incorporation	6 d		5			2960	probit analysis	Buldana 2007	IC50	EC50	Cry2Ab	Cry2Ab	0.38	µg/g	1000	380
183	Kranthi, S,, Dhawad, C, S,, Naidu, S,, Bharose, A,, Chaudhary, A,, Sangode, V,, Nehare, S, K,, Bajaj, S, R,, & Kranthi, K, R,	2009	Crop Protection, 28(5): 371-375	Susceptibility of the cotton bollworm, Helicoverpa armigera (Hubner) (Lepidoptera: Noctuidae) to the Bacillus thuringiensis toxin Cry2Ab before and after the introduction of Bollgard-II	y	India	Lepidoptera	Noctuidae	Helicoverpa	Helicoverpa armigera	F1	one-day old larvae	incorporation	6 d		5			2960	probit analysis	Saoner 2007	IC50	EC50	Cry2Ab	Cry2Ab	0.1	µg/g	1000	100
183	Kranthi, S,, Dhawad, C, S,, Naidu, S,, Bharose, A,, Chaudhary, A,, Sangode, V,, Nehare, S, K,, Bajaj, S, R,, & Kranthi, K, R,	2009	Crop Protection, 28(5): 371-375	Susceptibility of the cotton bollworm, Helicoverpa armigera (Hubner) (Lepidoptera: Noctuidae) to the Bacillus thuringiensis toxin Cry2Ab before and after the introduction of Bollgard-II	y	India	Lepidoptera	Noctuidae	Helicoverpa	Helicoverpa armigera	F1	one-day old larvae	incorporation	6 d		5			2960	probit analysis	Akola 2007	IC50	EC50	Cry2Ab	Cry2Ab	2.16	µg/g	1000	2160
1149	Liu, F,, Xu, Z,, Zhu, Y, C,, Huang, F,, Wang, Y,, Li, H,, Li, H,, Gao, C,, Zhou, W,, & Shen, J,	2009	Pest Management Science, 66(2): 155-161	Evidence of field-evolved resistance to Cry1Ac-expressing Bt cotton in Helicoverpa armigera (Lepidoptera: Noctuidae) in northern China	y	China	Lepidoptera	Noctuidae	Helicoverpa	Helicoverpa armigera	F1	neonates	incorporation	5 d		7	4	40	280	POLO software	field pop	LC50	LC50	Cry1Ac, MVP protoxin, encapsulated in Pseudomonas fluorescens	Cry1Ac	2.233	µg/ml	1000	2233			1,716 - 2,860	LC90 (µg/ml)	13.666		1,629 (± 0,163)
3190	Marcon, P, C, R, G,, Young, L, J,, Steffey, K, L,, & Siegfried, B, D,	1999	Journal of Economic Entomology, 92(2): 279-285	Baseline susceptibility of European corn borer (Lepidoptera : Crambidae) to Bacillus thuringiensis toxins	y	USA	Lepidoptera	Crambidae	Ostrinia	Ostrinia nubilalis	F1, F2, F3, lab strains	neonates	surface	7 d		8 - 9	3 x (2-4)		> 20,000	probit analysis	Colorado F1	LC50	LC50	Cry1Ac, MVP protoxin, encapsulated in Pseudomonas fluorescens	Cry1Ac	0.33	ng/cm2	1	0.33			0,25 - 0,43		2.02	1,42 - 3,34	2,09 ± 0,13	13.24	6
3190	Marcon, P, C, R, G,, Young, L, J,, Steffey, K, L,, & Siegfried, B, D,	1999	Journal of Economic Entomology, 92(2): 279-285	Baseline susceptibility of European corn borer (Lepidoptera : Crambidae) to Bacillus thuringiensis toxins	y	USA	Lepidoptera	Crambidae	Ostrinia	Ostrinia nubilalis	F1, F2, F3, lab strains	neonates	surface	7 d		8 - 9	3 x (2-4)		> 20,000	probit analysis	Illinois F2	LC50	LC50	Cry1Ac, MVP protoxin, encapsulated in Pseudomonas fluorescens	Cry1Ac	0.78	ng/cm2	1	0.78			0,67 - 0,89		4.53	3,68 - 5,87	2,15 ± 0,15	46143	6
3190	Marcon, P, C, R, G,, Young, L, J,, Steffey, K, L,, & Siegfried, B, D,	1999	Journal of Economic Entomology, 92(2): 279-285	Baseline susceptibility of European corn borer (Lepidoptera : Crambidae) to Bacillus thuringiensis toxins	y	USA	Lepidoptera	Crambidae	Ostrinia	Ostrinia nubilalis	F1, F2, F3, lab strains	neonates	surface	7 d		8 - 9	3 x (2-4)		> 20,000	probit analysis	Indiana F1	LC50	LC50	Cry1Ac, MVP protoxin, encapsulated in Pseudomonas fluorescens	Cry1Ac	0.4	ng/cm2	1	0.4			0,28 - 0,53		2.9	1,98 - 5,09	1,19 ± 0,12	13.48	6
3190	Marcon, P, C, R, G,, Young, L, J,, Steffey, K, L,, & Siegfried, B, D,	1999	Journal of Economic Entomology, 92(2): 279-285	Baseline susceptibility of European corn borer (Lepidoptera : Crambidae) to Bacillus thuringiensis toxins	y	USA	Lepidoptera	Crambidae	Ostrinia	Ostrinia nubilalis	F1, F2, F3, lab strains	neonates	surface	7 d		8 - 9	3 x (2-4)		> 20,000	probit analysis	Iowa F1	LC50	LC50	Cry1Ac, MVP protoxin, encapsulated in Pseudomonas fluorescens	Cry1Ac	0.21	ng/cm2	1	0.21			0,17 - 0,25		1.15	0,93 - 1,47	2,23 ± 0,17	23071	6
3190	Marcon, P, C, R, G,, Young, L, J,, Steffey, K, L,, & Siegfried, B, D,	1999	Journal of Economic Entomology, 92(2): 279-285	Baseline susceptibility of European corn borer (Lepidoptera : Crambidae) to Bacillus thuringiensis toxins	y	Italy	Lepidoptera	Crambidae	Ostrinia	Ostrinia nubilalis	F1, F2, F3, lab strains	neonates	surface	7 d		8 - 9	3 x (2-4)		> 20,000	probit analysis	Italy F2	LC50	LC50	Cry1Ac, MVP protoxin, encapsulated in Pseudomonas fluorescens	Cry1Ac	0.2	ng/cm2	1	0.2			0,16 - 0,25		1.46	1,08 - 2,19	1,90 ± 0,11	44075	6
3190	Marcon, P, C, R, G,, Young, L, J,, Steffey, K, L,, & Siegfried, B, D,	1999	Journal of Economic Entomology, 92(2): 279-285	Baseline susceptibility of European corn borer (Lepidoptera : Crambidae) to Bacillus thuringiensis toxins	y	USA	Lepidoptera	Crambidae	Ostrinia	Ostrinia nubilalis	F1, F2, F3, lab strains	neonates	surface	7 d		8 - 9	3 x (2-4)		> 20,000	probit analysis	Nebraska F1	LC50	LC50	Cry1Ac, MVP protoxin, encapsulated in Pseudomonas fluorescens	Cry1Ac	0.29	ng/cm2	1	0.29			0,21 - 0,37		2.3	1,62 - 3,73	1,82 ± 0,11	16742	6
3190	Marcon, P, C, R, G,, Young, L, J,, Steffey, K, L,, & Siegfried, B, D,	1999	Journal of Economic Entomology, 92(2): 279-285	Baseline susceptibility of European corn borer (Lepidoptera : Crambidae) to Bacillus thuringiensis toxins	y	USA	Lepidoptera	Crambidae	Ostrinia	Ostrinia nubilalis	F1, F2, F3, lab strains	neonates	surface	7 d		8 - 9	3 x (2-4)		> 20,000	probit analysis	N, Dakota F2	LC50	LC50	Cry1Ac, MVP protoxin, encapsulated in Pseudomonas fluorescens	Cry1Ac	0.53	ng/cm2	1	0.53			0,42 - 0,66		3.19	2,38 - 4,76	2,12 ± 0,17	46905	6
3190	Marcon, P, C, R, G,, Young, L, J,, Steffey, K, L,, & Siegfried, B, D,	1999	Journal of Economic Entomology, 92(2): 279-285	Baseline susceptibility of European corn borer (Lepidoptera : Crambidae) to Bacillus thuringiensis toxins	y	USA	Lepidoptera	Crambidae	Ostrinia	Ostrinia nubilalis	F1, F2, F3, lab strains	neonates	surface	7 d		8 - 9	3 x (2-4)		> 20,000	probit analysis	North Carolina F1	LC50	LC50	Cry1Ac, MVP protoxin, encapsulated in Pseudomonas fluorescens	Cry1Ac	0.33	ng/cm2	1	0.33			0,25 - 0,42		2.64	1,89 - 4,17	1,83 ± 0,09	17.45	6
3190	Marcon, P, C, R, G,, Young, L, J,, Steffey, K, L,, & Siegfried, B, D,	1999	Journal of Economic Entomology, 92(2): 279-285	Baseline susceptibility of European corn borer (Lepidoptera : Crambidae) to Bacillus thuringiensis toxins	y	USA	Lepidoptera	Crambidae	Ostrinia	Ostrinia nubilalis	F1, F2, F3, lab strains	neonates	surface	7 d		8 - 9	3 x (2-4)		> 20,000	probit analysis	North Carolina F2	LC50	LC50	Cry1Ac, MVP protoxin, encapsulated in Pseudomonas fluorescens	Cry1Ac	0.42	ng/cm2	1	0.42			0,30 - 0,55		1.88	1,31 - 3,37	2,52 ± 0,19	15.95	6
3190	Marcon, P, C, R, G,, Young, L, J,, Steffey, K, L,, & Siegfried, B, D,	1999	Journal of Economic Entomology, 92(2): 279-285	Baseline susceptibility of European corn borer (Lepidoptera : Crambidae) to Bacillus thuringiensis toxins	y	USA	Lepidoptera	Crambidae	Ostrinia	Ostrinia nubilalis	F1, F2, F3, lab strains	neonates	surface	7 d		8 - 9	3 x (2-4)		> 20,000	probit analysis	Pennsylvania F1	LC50	LC50	Cry1Ac, MVP protoxin, encapsulated in Pseudomonas fluorescens	Cry1Ac	0.42	ng/cm2	1	0.42			0,30 - 0,57		2.97	1,93 - 5,72	1,95 ± 0,10	24.58	6
3190	Marcon, P, C, R, G,, Young, L, J,, Steffey, K, L,, & Siegfried, B, D,	1999	Journal of Economic Entomology, 92(2): 279-285	Baseline susceptibility of European corn borer (Lepidoptera : Crambidae) to Bacillus thuringiensis toxins	y	USA	Lepidoptera	Crambidae	Ostrinia	Ostrinia nubilalis	F1, F2, F3, lab strains	neonates	surface	7 d		8 - 9	3 x (2-4)		> 20,000	probit analysis	Tennessee F2	LC50	LC50	Cry1Ac, MVP protoxin, encapsulated in Pseudomonas fluorescens	Cry1Ac	0.44	ng/cm2	1	0.44			0,36 - 0,52		2.23	1,73 - 3,12	2,33 ± 0,14	18476	6
3190	Marcon, P, C, R, G,, Young, L, J,, Steffey, K, L,, & Siegfried, B, D,	1999	Journal of Economic Entomology, 92(2): 279-285	Baseline susceptibility of European corn borer (Lepidoptera : Crambidae) to Bacillus thuringiensis toxins	y	USA	Lepidoptera	Crambidae	Ostrinia	Ostrinia nubilalis	F1, F2, F3, lab strains	neonates	surface	7 d		8 - 9	3 x (2-4)		> 20,000	probit analysis	Colorado	EC50	EC50	Cry1Ac, MVP protoxin, encapsulated in Pseudomonas fluorescens	Cry1Ac	0.076	ng/cm2	1	0.076			0,072 - 0,081	EC95 (ng/cm2)	0.44	0,37 - 0,51
3190	Marcon, P, C, R, G,, Young, L, J,, Steffey, K, L,, & Siegfried, B, D,	1999	Journal of Economic Entomology, 92(2): 279-285	Baseline susceptibility of European corn borer (Lepidoptera : Crambidae) to Bacillus thuringiensis toxins	y	USA	Lepidoptera	Crambidae	Ostrinia	Ostrinia nubilalis	F1, F2, F3, lab strains	neonates	surface	7 d		8 - 9	3 x (2-4)		> 20,000	probit analysis	Illinois	EC50	EC50	Cry1Ac, MVP protoxin, encapsulated in Pseudomonas fluorescens	Cry1Ac	0.11	ng/cm2	1	0.11			0,072 - 0,081	EC95 (ng/cm2)	0.44	0,37 - 0,51
3190	Marcon, P, C, R, G,, Young, L, J,, Steffey, K, L,, & Siegfried, B, D,	1999	Journal of Economic Entomology, 92(2): 279-285	Baseline susceptibility of European corn borer (Lepidoptera : Crambidae) to Bacillus thuringiensis toxins	y	USA	Lepidoptera	Crambidae	Ostrinia	Ostrinia nubilalis	F1, F2, F3, lab strains	neonates	surface	7 d		8 - 9	3 x (2-4)		> 20,000	probit analysis	Indiana	EC50	EC50	Cry1Ac, MVP protoxin, encapsulated in Pseudomonas fluorescens	Cry1Ac	0.13	ng/cm2	1	0.13			0,072 - 0,081	EC95 (ng/cm2)	0.44	0,37 - 0,51
3190	Marcon, P, C, R, G,, Young, L, J,, Steffey, K, L,, & Siegfried, B, D,	1999	Journal of Economic Entomology, 92(2): 279-285	Baseline susceptibility of European corn borer (Lepidoptera : Crambidae) to Bacillus thuringiensis toxins	y	USA	Lepidoptera	Crambidae	Ostrinia	Ostrinia nubilalis	F1, F2, F3, lab strains	neonates	surface	7 d		8 - 9	3 x (2-4)		> 20,000	probit analysis	Iowa	EC50	EC50	Cry1Ac, MVP protoxin, encapsulated in Pseudomonas fluorescens	Cry1Ac	0.071	ng/cm2	1	0.071			0,072 - 0,081	EC95 (ng/cm2)	0.44	0,37 - 0,51
3190	Marcon, P, C, R, G,, Young, L, J,, Steffey, K, L,, & Siegfried, B, D,	1999	Journal of Economic Entomology, 92(2): 279-285	Baseline susceptibility of European corn borer (Lepidoptera : Crambidae) to Bacillus thuringiensis toxins	y	USA	Lepidoptera	Crambidae	Ostrinia	Ostrinia nubilalis	F1, F2, F3, lab strains	neonates	surface	7 d		8 - 9	3 x (2-4)		> 20,000	probit analysis	Italy	EC50	EC50	Cry1Ac, MVP protoxin, encapsulated in Pseudomonas fluorescens	Cry1Ac	0.052	ng/cm2	1	0.052			0,072 - 0,081	EC95 (ng/cm2)	0.44	0,37 - 0,51
3190	Marcon, P, C, R, G,, Young, L, J,, Steffey, K, L,, & Siegfried, B, D,	1999	Journal of Economic Entomology, 92(2): 279-285	Baseline susceptibility of European corn borer (Lepidoptera : Crambidae) to Bacillus thuringiensis toxins	y	USA	Lepidoptera	Crambidae	Ostrinia	Ostrinia nubilalis	F1, F2, F3, lab strains	neonates	surface	7 d		8 - 9	3 x (2-4)		> 20,000	probit analysis	Nebraska	EC50	EC50	Cry1Ac, MVP protoxin, encapsulated in Pseudomonas fluorescens	Cry1Ac	0.079	ng/cm2	1	0.079			0,072 - 0,081	EC95 (ng/cm2)	0.44	0,37 - 0,51
3190	Marcon, P, C, R, G,, Young, L, J,, Steffey, K, L,, & Siegfried, B, D,	1999	Journal of Economic Entomology, 92(2): 279-285	Baseline susceptibility of European corn borer (Lepidoptera : Crambidae) to Bacillus thuringiensis toxins	y	USA	Lepidoptera	Crambidae	Ostrinia	Ostrinia nubilalis	F1, F2, F3, lab strains	neonates	surface	7 d		8 - 9	3 x (2-4)		> 20,000	probit analysis	N Carolina	EC50	EC50	Cry1Ac, MVP protoxin, encapsulated in Pseudomonas fluorescens	Cry1Ac	0.067	ng/cm2	1	0.067			0,072 - 0,081	EC95 (ng/cm2)	0.44	0,37 - 0,51
3190	Marcon, P, C, R, G,, Young, L, J,, Steffey, K, L,, & Siegfried, B, D,	1999	Journal of Economic Entomology, 92(2): 279-285	Baseline susceptibility of European corn borer (Lepidoptera : Crambidae) to Bacillus thuringiensis toxins	y	USA	Lepidoptera	Crambidae	Ostrinia	Ostrinia nubilalis	F1, F2, F3, lab strains	neonates	surface	7 d		8 - 9	3 x (2-4)		> 20,000	probit analysis	N Carolina	EC50	EC50	Cry1Ac, MVP protoxin, encapsulated in Pseudomonas fluorescens	Cry1Ac	0.11	ng/cm2	1	0.11			0,072 - 0,081	EC95 (ng/cm2)	0.44	0,37 - 0,51
3190	Marcon, P, C, R, G,, Young, L, J,, Steffey, K, L,, & Siegfried, B, D,	1999	Journal of Economic Entomology, 92(2): 279-285	Baseline susceptibility of European corn borer (Lepidoptera : Crambidae) to Bacillus thuringiensis toxins	y	USA	Lepidoptera	Crambidae	Ostrinia	Ostrinia nubilalis	F1, F2, F3, lab strains	neonates	surface	7 d		8 - 9	3 x (2-4)		> 20,000	probit analysis	N Dakota (BV)	EC50	EC50	Cry1Ac, MVP protoxin, encapsulated in Pseudomonas fluorescens	Cry1Ac	0.12	ng/cm2	1	0.12			0,072 - 0,081	EC95 (ng/cm2)	0.44	0,37 - 0,51
3190	Marcon, P, C, R, G,, Young, L, J,, Steffey, K, L,, & Siegfried, B, D,	1999	Journal of Economic Entomology, 92(2): 279-285	Baseline susceptibility of European corn borer (Lepidoptera : Crambidae) to Bacillus thuringiensis toxins	y	USA	Lepidoptera	Crambidae	Ostrinia	Ostrinia nubilalis	F1, F2, F3, lab strains	neonates	surface	7 d		8 - 9	3 x (2-4)		> 20,000	probit analysis	Tennessee	EC50	EC50	Cry1Ac, MVP protoxin, encapsulated in Pseudomonas fluorescens	Cry1Ac	0.11	ng/cm2	1	0.11			0,072 - 0,081	EC95 (ng/cm2)	0.44	0,37 - 0,51
8711	Meise, T, & Langenbruch, G, A,	2007	Nachrichtenblatt Des Deutschen Pflanzenschutzdienstes, 59(12): 297-301	Susceptibility of German populations of the Corn Borer Ostrinia nubilalis (Lepidoptera: Pyralidae) to a Bacillus thuringiensis endotoxin	n	Germany	Lepidoptera	Crambidae	Ostrinia	Ostrinia nubilalis	F1	neonates	surface	7 d		7			> 25,000	NLMIXED Prozedur	2000 LA	LC50	LC50	Cry1Ab	Cry1Ab	60	ng/cm2	1	60			44 - 81				2,15 (1,54 - 2,77)				y	n	y	y	n	y	y
8711	Meise, T, & Langenbruch, G, A,	2007	Nachrichtenblatt Des Deutschen Pflanzenschutzdienstes, 59(12): 297-301	Susceptibility of German populations of the Corn Borer Ostrinia nubilalis (Lepidoptera: Pyralidae) to a Bacillus thuringiensis endotoxin	n	Germany	Lepidoptera	Crambidae	Ostrinia	Ostrinia nubilalis	F1	neonates	surface	7 d		7			> 25,000	NLMIXED Prozedur	2000 PO	LC50	LC50	Cry1Ab	Cry1Ab	32	ng/cm2	1	32			21 - 50				2,65 (1,73 - 3,56)				y	n	y	y	n	y	y
8711	Meise, T, & Langenbruch, G, A,	2007	Nachrichtenblatt Des Deutschen Pflanzenschutzdienstes, 59(12): 297-301	Susceptibility of German populations of the Corn Borer Ostrinia nubilalis (Lepidoptera: Pyralidae) to a Bacillus thuringiensis endotoxin	n	Germany	Lepidoptera	Crambidae	Ostrinia	Ostrinia nubilalis	F1	neonates	surface	7 d		7			> 25,000	NLMIXED Prozedur	2000 NI	LC50	LC50	Cry1Ab	Cry1Ab	19	ng/cm2	1	19			14 - 28				3,39 (2,37 - 4,41)				y	n	y	y	n	y	y
8711	Meise, T, & Langenbruch, G, A,	2007	Nachrichtenblatt Des Deutschen Pflanzenschutzdienstes, 59(12): 297-301	Susceptibility of German populations of the Corn Borer Ostrinia nubilalis (Lepidoptera: Pyralidae) to a Bacillus thuringiensis endotoxin	n	Germany	Lepidoptera	Crambidae	Ostrinia	Ostrinia nubilalis	F1	neonates	surface	7 d		7			> 25,000	NLMIXED Prozedur	2000 HR	LC50	LC50	Cry1Ab	Cry1Ab	33	ng/cm2	1	33			24 - 44				2,24 (1,66 - 2,83)				y	n	y	y	n	y	y
8711	Meise, T, & Langenbruch, G, A,	2007	Nachrichtenblatt Des Deutschen Pflanzenschutzdienstes, 59(12): 297-301	Susceptibility of German populations of the Corn Borer Ostrinia nubilalis (Lepidoptera: Pyralidae) to a Bacillus thuringiensis endotoxin	n	Germany	Lepidoptera	Crambidae	Ostrinia	Ostrinia nubilalis	F1	neonates	surface	7 d		7			> 25,000	NLMIXED Prozedur	2001 LA	LC50	LC50	Cry1Ab	Cry1Ab	46	ng/cm2	1	46			26 - 82				1,68 (1,16 - 2,21)				y	n	y	y	n	y	y
8711	Meise, T, & Langenbruch, G, A,	2007	Nachrichtenblatt Des Deutschen Pflanzenschutzdienstes, 59(12): 297-301	Susceptibility of German populations of the Corn Borer Ostrinia nubilalis (Lepidoptera: Pyralidae) to a Bacillus thuringiensis endotoxin	n	Germany	Lepidoptera	Crambidae	Ostrinia	Ostrinia nubilalis	F1	neonates	surface	7 d		7			> 25,000	NLMIXED Prozedur	2001 PO	LC50	LC50	Cry1Ab	Cry1Ab	55	ng/cm2	1	55			21 - 142				1,97 (1,06 - 2,87)				y	n	y	y	n	y	y
8711	Meise, T, & Langenbruch, G, A,	2007	Nachrichtenblatt Des Deutschen Pflanzenschutzdienstes, 59(12): 297-301	Susceptibility of German populations of the Corn Borer Ostrinia nubilalis (Lepidoptera: Pyralidae) to a Bacillus thuringiensis endotoxin	n	Germany	Lepidoptera	Crambidae	Ostrinia	Ostrinia nubilalis	F1	neonates	surface	7 d		7			> 25,000	NLMIXED Prozedur	2001 NI	LC50	LC50	Cry1Ab	Cry1Ab	28	ng/cm2	1	28			9 - 85				1,91 (0,86 - 2,96)				y	n	y	y	n	y	y
8711	Meise, T, & Langenbruch, G, A,	2007	Nachrichtenblatt Des Deutschen Pflanzenschutzdienstes, 59(12): 297-301	Susceptibility of German populations of the Corn Borer Ostrinia nubilalis (Lepidoptera: Pyralidae) to a Bacillus thuringiensis endotoxin	n	Germany	Lepidoptera	Crambidae	Ostrinia	Ostrinia nubilalis	F1	neonates	surface	7 d		7			> 25,000	NLMIXED Prozedur	2001 HR	LC50	LC50	Cry1Ab	Cry1Ab	28	ng/cm2	1	28			15 - 50				1,76 (1,21 - 2,31)				y	n	y	y	n	y	y
8711	Meise, T, & Langenbruch, G, A,	2007	Nachrichtenblatt Des Deutschen Pflanzenschutzdienstes, 59(12): 297-301	Susceptibility of German populations of the Corn Borer Ostrinia nubilalis (Lepidoptera: Pyralidae) to a Bacillus thuringiensis endotoxin	n	Germany	Lepidoptera	Crambidae	Ostrinia	Ostrinia nubilalis	F1	neonates	surface	7 d		7			> 25,000	NLMIXED Prozedur	2001 OD	LC50	LC50	Cry1Ab	Cry1Ab	10	ng/cm2	1	10			6 -19				1,88 (1,36 - 2,41)				y	n	y	y	n	y	y
8711	Meise, T, & Langenbruch, G, A,	2007	Nachrichtenblatt Des Deutschen Pflanzenschutzdienstes, 59(12): 297-301	Susceptibility of German populations of the Corn Borer Ostrinia nubilalis (Lepidoptera: Pyralidae) to a Bacillus thuringiensis endotoxin	n	Germany	Lepidoptera	Crambidae	Ostrinia	Ostrinia nubilalis	F1	neonates	surface	7 d		7			> 25,000	NLMIXED Prozedur	2002 LA	LC50	LC50	Cry1Ab	Cry1Ab	3	ng/cm2	1	3			1 - 12				1,54 (0,91 - 2,17)				y	n	y	y	n	y	y
8711	Meise, T, & Langenbruch, G, A,	2007	Nachrichtenblatt Des Deutschen Pflanzenschutzdienstes, 59(12): 297-301	Susceptibility of German populations of the Corn Borer Ostrinia nubilalis (Lepidoptera: Pyralidae) to a Bacillus thuringiensis endotoxin	n	Germany	Lepidoptera	Crambidae	Ostrinia	Ostrinia nubilalis	F1	neonates	surface	7 d		7			> 25,000	NLMIXED Prozedur	2002 PO	LC50	LC50	Cry1Ab	Cry1Ab	28	ng/cm2	1	28			11 -72				1,73 (1,19 - 2,28)				y	n	y	y	n	y	y
8711	Meise, T, & Langenbruch, G, A,	2007	Nachrichtenblatt Des Deutschen Pflanzenschutzdienstes, 59(12): 297-301	Susceptibility of German populations of the Corn Borer Ostrinia nubilalis (Lepidoptera: Pyralidae) to a Bacillus thuringiensis endotoxin	n	Germany	Lepidoptera	Crambidae	Ostrinia	Ostrinia nubilalis	F1	neonates	surface	7 d		7			> 25,000	NLMIXED Prozedur	2002 NI	LC50	LC50	Cry1Ab	Cry1Ab	17	ng/cm2	1	17			8 - 37				2,09 (1,64 - 2,54)				y	n	y	y	n	y	y
8711	Meise, T, & Langenbruch, G, A,	2007	Nachrichtenblatt Des Deutschen Pflanzenschutzdienstes, 59(12): 297-301	Susceptibility of German populations of the Corn Borer Ostrinia nubilalis (Lepidoptera: Pyralidae) to a Bacillus thuringiensis endotoxin	n	Germany	Lepidoptera	Crambidae	Ostrinia	Ostrinia nubilalis	F1	neonates	surface	7 d		7			> 25,000	NLMIXED Prozedur	2002 HR	LC50	LC50	Cry1Ab	Cry1Ab	16	ng/cm2	1	16			6 - 38				1,95 (1,41 - 2,50)				y	n	y	y	n	y	y
8711	Meise, T, & Langenbruch, G, A,	2007	Nachrichtenblatt Des Deutschen Pflanzenschutzdienstes, 59(12): 297-301	Susceptibility of German populations of the Corn Borer Ostrinia nubilalis (Lepidoptera: Pyralidae) to a Bacillus thuringiensis endotoxin	n	Germany	Lepidoptera	Crambidae	Ostrinia	Ostrinia nubilalis	F1	neonates	surface	7 d		7			> 25,000	NLMIXED Prozedur	2002 OD	LC50	LC50	Cry1Ab	Cry1Ab	9	ng/cm2	1	9			4 - 19				1,98 (1,54 - 2,42)				y	n	y	y	n	y	y
8711	Meise, T, & Langenbruch, G, A,	2007	Nachrichtenblatt Des Deutschen Pflanzenschutzdienstes, 59(12): 297-301	Susceptibility of German populations of the Corn Borer Ostrinia nubilalis (Lepidoptera: Pyralidae) to a Bacillus thuringiensis endotoxin	n	Germany	Lepidoptera	Crambidae	Ostrinia	Ostrinia nubilalis	F1	neonates	surface	7 d		7			> 25,000	NLMIXED Prozedur	2002 HA	LC50	LC50	Cry1Ab	Cry1Ab	25	ng/cm2	1	25			12 - 51				2,08 (1,65 - 2,51)				y	n	y	y	n	y	y
1930	Saeglitz, C,, Bartsch, D,, Eber, S,, Gathmann, A,, Priesnitz, K,, & Schuphan, I,	2006	Journal of Economic Entomology, 99(5): 1768-1773	Monitoring the Cry1Ab susceptibility of European corn borer in Germany	y	Germany	Lepidoptera	Crambidae	Ostrinia	Ostrinia nubilalis	F1, F2 Labstrain (F42)	neonate	incorporation	7 d	21568	5 to 7	4 to 10	64	32	probit analysis	Bonn	LC50	LC50	Cry1Ab Trancated Monsanto	Cry1Ab	0.34	µg/g	1000	340			0,21-0,54		4.45	2,31-12,44	1,15 ± 0,62	0.15	5		y	N	n	y	y	y	y
1930	Saeglitz, C,, Bartsch, D,, Eber, S,, Gathmann, A,, Priesnitz, K,, & Schuphan, I,	2006	Journal of Economic Entomology, 99(5): 1768-1773	Monitoring the Cry1Ab susceptibility of European corn borer in Germany	y	Germany	Lepidoptera	Crambidae	Ostrinia	Ostrinia nubilalis	F1, F2 Labstrain (F42)	neonate	incorporation	7 d	21568	5 to 7	4 to 10	64	32	probit analysis	Karlsruhe	LC50	LC50	Cry1Ab Trancated Monsanto	Cry1Ab	0.11	µg/g	1000	110			0,09-0,13		0.93	0,70-1,31	1,35 ± 0,96	0.03	5		y	N	n	y	y	y	y
1930	Saeglitz, C,, Bartsch, D,, Eber, S,, Gathmann, A,, Priesnitz, K,, & Schuphan, I,	2006	Journal of Economic Entomology, 99(5): 1768-1773	Monitoring the Cry1Ab susceptibility of European corn borer in Germany	y	Germany	Lepidoptera	Crambidae	Ostrinia	Ostrinia nubilalis	F1, F2 Labstrain (F42)	neonate	incorporation	7 d	21568	5 to 7	4 to 10	64	32	probit analysis	Freiburg (Þeld pop)	LC50	LC50	Cry1Ab Trancated Monsanto	Cry1Ab	0.11	µg/g	1000	110			0,07-0,19		3.33	1,13-9,81	0,87 ± 0,02	2.18	5		y	N	n	y	y	y	y
1930	Saeglitz, C,, Bartsch, D,, Eber, S,, Gathmann, A,, Priesnitz, K,, & Schuphan, I,	2006	Journal of Economic Entomology, 99(5): 1768-1773	Monitoring the Cry1Ab susceptibility of European corn borer in Germany	y	Germany	Lepidoptera	Crambidae	Ostrinia	Ostrinia nubilalis	F1, F2 Labstrain (F42)	neonate	incorporation	7 d	21568	5 to 7	4 to 10	64	32	probit analysis	Lake Constance	LC50	LC50	Cry1Ab Trancated Monsanto	Cry1Ab	0.1	µg/g	1000	100			0,06-0,14		0.92	0,56-1,88	1,30 ± 0,98	0.09	5		y	N	n	y	y	y	y
1930	Saeglitz, C,, Bartsch, D,, Eber, S,, Gathmann, A,, Priesnitz, K,, & Schuphan, I,	2006	Journal of Economic Entomology, 99(5): 1768-1773	Monitoring the Cry1Ab susceptibility of European corn borer in Germany	y	Germany	Lepidoptera	Crambidae	Ostrinia	Ostrinia nubilalis	F1, F2 Labstrain (F42)	neonate	incorporation	7 d	21568	5 to 7	4 to 10	64	32	probit analysis	Bonn	LC50	LC50	Cry1Ab Truncated DLR	Cry1Ab	2.12	µg/g	1000	2120			1,40-3,21		23.99	10,34-55,68	1,22 ± 0,04	0.8	5		y	N	n	y	y	y	y
1930	Saeglitz, C,, Bartsch, D,, Eber, S,, Gathmann, A,, Priesnitz, K,, & Schuphan, I,	2006	Journal of Economic Entomology, 99(5): 1768-1773	Monitoring the Cry1Ab susceptibility of European corn borer in Germany	y	Germany	Lepidoptera	Crambidae	Ostrinia	Ostrinia nubilalis	F1, F2 Labstrain (F42)	neonate	incorporation	7 d	21568	5 to 7	4 to 10	64	32	probit analysis	Freiburg	LC50	LC50	Cry1Ab Truncated DLR	Cry1Ab	1.54	µg/g	1000	1540			0,97-2,42		28.01	10,87-72,16	1,02 ± 0,03	3.75	5		y	N	n	y	y	y	y
1930	Saeglitz, C,, Bartsch, D,, Eber, S,, Gathmann, A,, Priesnitz, K,, & Schuphan, I,	2006	Journal of Economic Entomology, 99(5): 1768-1773	Monitoring the Cry1Ab susceptibility of European corn borer in Germany	y	Germany	Lepidoptera	Crambidae	Ostrinia	Ostrinia nubilalis	F1, F2 Labstrain (F42)	neonate	incorporation	7 d	21568	5 to 7	4 to 10	64	32	probit analysis	Lake Constance	LC50	LC50	Cry1Ab Truncated DLR	Cry1Ab	1.64	µg/g	1000	1640			1,13-2,39		17.98	8,87-36,43	1,23 ± 0,03	2.74	5		y	N	n	y	y	y	y
1930	Saeglitz, C,, Bartsch, D,, Eber, S,, Gathmann, A,, Priesnitz, K,, & Schuphan, I,	2006	Journal of Economic Entomology, 99(5): 1768-1773	Monitoring the Cry1Ab susceptibility of European corn borer in Germany	y	Germany	Lepidoptera	Crambidae	Ostrinia	Ostrinia nubilalis	F1, F2 Labstrain (F42)	neonate	surface	7 d	21568	5 to 7	4 to 10	64	32	probit analysis	Bonn	LC50	LC50	Cry1Ab Truncated DLR	Cry1Ab	28.04	ng/cm2	1	28.04			19,74-39,84		213,37	102,3-445,08	1,45 ± 0,05	0,89	5		y	N	n	y	y	y	y
1930	Saeglitz, C,, Bartsch, D,, Eber, S,, Gathmann, A,, Priesnitz, K,, & Schuphan, I,	2006	Journal of Economic Entomology, 99(5): 1768-1773	Monitoring the Cry1Ab susceptibility of European corn borer in Germany	y	Germany	Lepidoptera	Crambidae	Ostrinia	Ostrinia nubilalis	F1, F2 Labstrain (F42)	neonate	surface	7 d	21568	5 to 7	4 to 10	64	32	probit analysis	Karlsruhe	LC50	LC50	Cry1Ab Truncated DLR	Cry1Ab	21.62	ng/cm2	1	21.62			15,63-29,90		183,15	104,9-324,60	1,38 ± 0,03	4,17	6		y	N	n	y	y	y	y
1930	Saeglitz, C,, Bartsch, D,, Eber, S,, Gathmann, A,, Priesnitz, K,, & Schuphan, I,	2006	Journal of Economic Entomology, 99(5): 1768-1773	Monitoring the Cry1Ab susceptibility of European corn borer in Germany	y	Germany	Lepidoptera	Crambidae	Ostrinia	Ostrinia nubilalis	F1, F2 Labstrain (F42)	neonate	surface	7 d	21568	5 to 7	4 to 10	64	32	probit analysis	Freiburg	LC50	LC50	Cry1Ab Truncated DLR	Cry1Ab	30.79	ng/cm2	1	30.79			21,26-44,60		372,89	171,34-811,51	1,18 ± 0,03	1,04	5		y	N	n	y	y	y	y
1930	Saeglitz, C,, Bartsch, D,, Eber, S,, Gathmann, A,, Priesnitz, K,, & Schuphan, I,	2006	Journal of Economic Entomology, 99(5): 1768-1773	Monitoring the Cry1Ab susceptibility of European corn borer in Germany	y	Germany	Lepidoptera	Crambidae	Ostrinia	Ostrinia nubilalis	F1, F2 Labstrain (F42)	neonate	surface	7 d	21568	5 to 7	4 to 10	64	32	probit analysis	Lake Constance	LC50	LC50	Cry1Ab Truncated DLR	Cry1Ab	17.17	ng/cm2	1	17.17			11,96-23,90		156,66	77,35-217,28	1,33 ± 0,04	1,65	5		y	N	n	y	y	y	y
1930	Saeglitz, C,, Bartsch, D,, Eber, S,, Gathmann, A,, Priesnitz, K,, & Schuphan, I,	2006	Journal of Economic Entomology, 99(5): 1768-1773	Monitoring the Cry1Ab susceptibility of European corn borer in Germany	y	Germany	Lepidoptera	Crambidae	Ostrinia	Ostrinia nubilalis	F1, F2 Labstrain (F42)	neonate	surface	7 d	21568	5 to 7	4 to 10	64	32	probit analysis	Freiburg	LC50	LC50	Cry1Ab Trancated Monsanto	Cry1Ab	3.61	ng/cm2	1	3.61			2,41-5,41		38,67	20,37-73,43	1,24 ± 0,03	0,81	5		y	N	n	y	y	y	y
2169	Siegfried, B, D,, Vaughn, T, T,, & Spencer, T,	2005	Journal of Economic Entomology, 98(4): 1320-1324	Baseline susceptibility of western corn rootworm (Coleoptera : Crysomelidae) to Cry3Bb1 Bacillus thuringiensis toxin	y	USA	Coleoptera	Chrysomelidae	Diabrotica	Diabrotica virgifera virgifera	5 to 7 or field collected	neonate	surface	4 - 7 d	275	6	6			probit analysis	Phelps Co, Keene	EC50	EC50	Cry3Bb3	Cry3Bb1	1.85	ng/cm2	1	1.85			(1,32-2,54)	LC50 in µg/cm²	2.11	1,38-3,00	1,32 ± 0,17	2.58	3		n	n	y	y	y	y	y
2169	Siegfried, B, D,, Vaughn, T, T,, & Spencer, T,	2005	Journal of Economic Entomology, 98(4): 1320-1324	Baseline susceptibility of western corn rootworm (Coleoptera : Crysomelidae) to Cry3Bb1 Bacillus thuringiensis toxin	y	USA	Coleoptera	Chrysomelidae	Diabrotica	Diabrotica virgifera virgifera	5 to 7 or field collected	neonate	surface	4 - 7 d	418	6	6			probit analysis	Phelps Co, Nitchie	EC50	EC50	Cry3Bb4	Cry3Bb1	2.1	ng/cm2	1	2.1			(0,57-6,79)	LC50 in µg/cm²	2.01	0,75-3,75	1,13 ± 0,15	13.13	8		n	n	y	y	y	y	y
2169	Siegfried, B, D,, Vaughn, T, T,, & Spencer, T,	2005	Journal of Economic Entomology, 98(4): 1320-1324	Baseline susceptibility of western corn rootworm (Coleoptera : Crysomelidae) to Cry3Bb1 Bacillus thuringiensis toxin	y	USA	Coleoptera	Chrysomelidae	Diabrotica	Diabrotica virgifera virgifera	5 to 7 or field collected	neonate	surface	4 - 7 d	203	6	6			probit analysis	Phelps Co, Wenz	EC50	EC50	Cry3Bb5	Cry3Bb1	0.97	ng/cm2	1	0.97			(0,51-1,52)	LC50 in µg/cm²	2.18	0,90-3,93	1,11 ± 0,21	0.99	3		n	n	y	y	y	y	y
2169	Siegfried, B, D,, Vaughn, T, T,, & Spencer, T,	2005	Journal of Economic Entomology, 98(4): 1320-1324	Baseline susceptibility of western corn rootworm (Coleoptera : Crysomelidae) to Cry3Bb1 Bacillus thuringiensis toxin	y	USA	Coleoptera	Chrysomelidae	Diabrotica	Diabrotica virgifera virgifera	5 to 7 or field collected	neonate	surface	4 - 7 d	137	6	6			probit analysis	Phelps Co, Vandell	EC50	EC50	Cry3Bb6	Cry3Bb1	2.12	ng/cm2	1	2.12			(0,62-4,89)	LC50 in µg/cm²	4.62	1,90-8,23	1,25 ± 0,30	0.74	2		n	n	y	y	y	y	y
2169	Siegfried, B, D,, Vaughn, T, T,, & Spencer, T,	2005	Journal of Economic Entomology, 98(4): 1320-1324	Baseline susceptibility of western corn rootworm (Coleoptera : Crysomelidae) to Cry3Bb1 Bacillus thuringiensis toxin	y	USA	Coleoptera	Chrysomelidae	Diabrotica	Diabrotica virgifera virgifera	5 to 7 or field collected	neonate	surface	4 - 7 d	198	6	6			probit analysis	Clay Co,	EC50	EC50	Cry3Bb7	Cry3Bb1	2.71	ng/cm2	1	2.71			(1,86-3,96)	LC50 in µg/cm²	2.84	1,29-5,10	1,17 ± 0,20	1.69	2		n	n	y	y	y	y	y
2169	Siegfried, B, D,, Vaughn, T, T,, & Spencer, T,	2005	Journal of Economic Entomology, 98(4): 1320-1324	Baseline susceptibility of western corn rootworm (Coleoptera : Crysomelidae) to Cry3Bb1 Bacillus thuringiensis toxin	y	USA	Coleoptera	Chrysomelidae	Diabrotica	Diabrotica virgifera virgifera	5 to 7 or field collected	neonate	surface	4 - 7 d	275	6	6			probit analysis	York Co,	EC50	EC50	Cry3Bb8	Cry3Bb1	3.14	ng/cm2	1	3.14			(1,59-5,77)	LC50 in µg/cm²	7.92	3,62-14,75	0,94 ± 0,21	1.79	2		n	n	y	y	y	y	y
2169	Siegfried, B, D,, Vaughn, T, T,, & Spencer, T,	2005	Journal of Economic Entomology, 98(4): 1320-1324	Baseline susceptibility of western corn rootworm (Coleoptera : Crysomelidae) to Cry3Bb1 Bacillus thuringiensis toxin	y	USA	Coleoptera	Chrysomelidae	Diabrotica	Diabrotica virgifera virgifera	5 to 7 or field collected	neonate	surface	4 - 7 d	140	6	6			probit analysis	Saunders Co,	EC50	EC50	Cry3Bb9	Cry3Bb1	1.62	ng/cm2	1	1.62			(0,62-3,45)	LC50 in µg/cm²	2.38	0,23-4,81	1,79 ± 0,59	0.77	3		n	n	y	y	y	y	y
2169	Siegfried, B, D,, Vaughn, T, T,, & Spencer, T,	2005	Journal of Economic Entomology, 98(4): 1320-1324	Baseline susceptibility of western corn rootworm (Coleoptera : Crysomelidae) to Cry3Bb1 Bacillus thuringiensis toxin	y	USA	Coleoptera	Chrysomelidae	Diabrotica	Diabrotica virgifera virgifera	5 to 7 or field collected	neonate	surface	4 - 7 d	115	6	6			probit analysis	Potter Co,	EC50	EC50	Cry3Bb10	Cry3Bb1	4.14	ng/cm2	1	4.14			(2,77-5,19)	LC50 in µg/cm²	10.79	4,34-22,23	1,41 ± 0,39	1.8	2		n	n	y	y	y	y	y
2169	Siegfried, B, D,, Vaughn, T, T,, & Spencer, T,	2005	Journal of Economic Entomology, 98(4): 1320-1324	Baseline susceptibility of western corn rootworm (Coleoptera : Crysomelidae) to Cry3Bb1 Bacillus thuringiensis toxin	y	USA	Coleoptera	Chrysomelidae	Diabrotica	Diabrotica virgifera virgifera	5 to 7 or field collected	neonate	surface	4 - 7 d	303	6	6			probit analysis	Tippecanoe Co,	EC50	EC50	Cry3Bb11	Cry3Bb1	3.75	ng/cm2	1	3.75			(2,41-5,81)	LC50 in µg/cm²	4.14	2,59-5,98	1,51 ± 0,21	2.86	3		n	n	y	y	y	y	y
2169	Siegfried, B, D,, Vaughn, T, T,, & Spencer, T,	2005	Journal of Economic Entomology, 98(4): 1320-1324	Baseline susceptibility of western corn rootworm (Coleoptera : Crysomelidae) to Cry3Bb1 Bacillus thuringiensis toxin	y	USA	Coleoptera	Chrysomelidae	Diabrotica	Diabrotica virgifera virgifera	5 to 7 or field collected	neonate	surface	4 - 7 d	244	6	6			probit analysis	Finney Co,	EC50	EC50	Cry3Bb12	Cry3Bb1	1.67	ng/cm2	1	1.67			(1,41-1,98)	LC50 in µg/cm²	2.36	1,65-3,24	1,70 ± 0,21	2.47	3		n	n	y	y	y	y	y
2169	Siegfried, B, D,, Vaughn, T, T,, & Spencer, T,	2005	Journal of Economic Entomology, 98(4): 1320-1324	Baseline susceptibility of western corn rootworm (Coleoptera : Crysomelidae) to Cry3Bb1 Bacillus thuringiensis toxin	y	USA	Coleoptera	Chrysomelidae	Diabrotica	Diabrotica virgifera virgifera	5 to 7 or field collected	neonate	surface	4 - 7 d	292	6	6			probit analysis	Champaign Co,	EC50	EC50	Cry3Bb13	Cry3Bb1	1.95	ng/cm2	1	1.95			(1,55-2,43)	LC50 in µg/cm²	6.76	3,91-11,04	1,08 ± 0,17	1.77	3		n	n	y	y	y	y	y
2169	Siegfried, B, D,, Vaughn, T, T,, & Spencer, T,	2005	Journal of Economic Entomology, 98(4): 1320-1324	Baseline susceptibility of western corn rootworm (Coleoptera : Crysomelidae) to Cry3Bb1 Bacillus thuringiensis toxin	y	USA	Coleoptera	Chrysomelidae	Diabrotica	Diabrotica virgifera virgifera	5 to 7 or field collected	neonate	surface	4 - 7 d	164	6	6			probit analysis	Center Co,	EC50	EC50	Cry3Bb14	Cry3Bb1	2.49	ng/cm2	1	2.49			(2,12-2,93)	LC50 in µg/cm²	2.06	1,04-2,97	3,07 ± 0,84	0.15	2		n	n	y	y	y	y	y
4836	Siegfried, B, D,, Rangasamy, M,, Wang, H,, Spencer, T,, Haridas, C, V,, Tenhumberg, B,, Sumerford, D, V,, & Storer, N, P,	2014	Pest Management Science, 70(5): 725-733	Estimating the frequency of Cry1F resistance in field populations of the European corn borer (Lepidoptera: Crambidae)	y	USA	Lepidoptera	Crambidae	Ostrinia	Ostrinia nubilalis	1 to 4	neonate	surface	7 d			3		112		East IA	EC50	EC50	Cry1F	Cry1F	0.57	ng/cm2	1	0.57										x	y	n	n	y	y	n	y
4836	Siegfried, B, D,, Rangasamy, M,, Wang, H,, Spencer, T,, Haridas, C, V,, Tenhumberg, B,, Sumerford, D, V,, & Storer, N, P,	2014	Pest Management Science, 70(5): 725-733	Estimating the frequency of Cry1F resistance in field populations of the European corn borer (Lepidoptera: Crambidae)	y	USA	Lepidoptera	Crambidae	Ostrinia	Ostrinia nubilalis	1 to 4	neonate	surface	7 d			3		112		Polk/Story	EC50	EC50	Cry1F	Cry1F	0.95	ng/cm2	1	0.95										x	y	n	n	y	y	n	y
4836	Siegfried, B, D,, Rangasamy, M,, Wang, H,, Spencer, T,, Haridas, C, V,, Tenhumberg, B,, Sumerford, D, V,, & Storer, N, P,	2014	Pest Management Science, 70(5): 725-733	Estimating the frequency of Cry1F resistance in field populations of the European corn borer (Lepidoptera: Crambidae)	y	USA	Lepidoptera	Crambidae	Ostrinia	Ostrinia nubilalis	1 to 4	neonate	surface	7 d			3		112		Bureau	EC50	EC50	Cry1F	Cry1F	0.46	ng/cm2	1	0.46										x	y	n	n	y	y	n	y
4836	Siegfried, B, D,, Rangasamy, M,, Wang, H,, Spencer, T,, Haridas, C, V,, Tenhumberg, B,, Sumerford, D, V,, & Storer, N, P,	2014	Pest Management Science, 70(5): 725-733	Estimating the frequency of Cry1F resistance in field populations of the European corn borer (Lepidoptera: Crambidae)	y	USA	Lepidoptera	Crambidae	Ostrinia	Ostrinia nubilalis	1 to 4	neonate	surface	7 d			3		112		Champaign	EC50	EC50	Cry1F	Cry1F	0.68	ng/cm2	1	0.68										x	y	n	n	y	y	n	y
4836	Siegfried, B, D,, Rangasamy, M,, Wang, H,, Spencer, T,, Haridas, C, V,, Tenhumberg, B,, Sumerford, D, V,, & Storer, N, P,	2014	Pest Management Science, 70(5): 725-733	Estimating the frequency of Cry1F resistance in field populations of the European corn borer (Lepidoptera: Crambidae)	y	USA	Lepidoptera	Crambidae	Ostrinia	Ostrinia nubilalis	1 to 4	neonate	surface	7 d			3		112		Dekalb	EC50	EC50	Cry1F	Cry1F	0.3	ng/cm2	1	0.3										x	y	n	n	y	y	n	y
4836	Siegfried, B, D,, Rangasamy, M,, Wang, H,, Spencer, T,, Haridas, C, V,, Tenhumberg, B,, Sumerford, D, V,, & Storer, N, P,	2014	Pest Management Science, 70(5): 725-733	Estimating the frequency of Cry1F resistance in field populations of the European corn borer (Lepidoptera: Crambidae)	y	USA	Lepidoptera	Crambidae	Ostrinia	Ostrinia nubilalis	1 to 4	neonate	surface	7 d			3		112		Warren	EC50	EC50	Cry1F	Cry1F	0.63	ng/cm2	1	0.63										x	y	n	n	y	y	n	y
4836	Siegfried, B, D,, Rangasamy, M,, Wang, H,, Spencer, T,, Haridas, C, V,, Tenhumberg, B,, Sumerford, D, V,, & Storer, N, P,	2014	Pest Management Science, 70(5): 725-733	Estimating the frequency of Cry1F resistance in field populations of the European corn borer (Lepidoptera: Crambidae)	y	USA	Lepidoptera	Crambidae	Ostrinia	Ostrinia nubilalis	1 to 4	neonate	surface	7 d			3		112		Finney	EC50	EC50	Cry1F	Cry1F	0.57	ng/cm2	1	0.57										x	y	n	n	y	y	n	y
4836	Siegfried, B, D,, Rangasamy, M,, Wang, H,, Spencer, T,, Haridas, C, V,, Tenhumberg, B,, Sumerford, D, V,, & Storer, N, P,	2014	Pest Management Science, 70(5): 725-733	Estimating the frequency of Cry1F resistance in field populations of the European corn borer (Lepidoptera: Crambidae)	y	USA	Lepidoptera	Crambidae	Ostrinia	Ostrinia nubilalis	1 to 4	neonate	surface	7 d			3		112		Douglas	EC50	EC50	Cry1F	Cry1F	0.54	ng/cm2	1	0.54										x	y	n	n	y	y	n	y
4836	Siegfried, B, D,, Rangasamy, M,, Wang, H,, Spencer, T,, Haridas, C, V,, Tenhumberg, B,, Sumerford, D, V,, & Storer, N, P,	2014	Pest Management Science, 70(5): 725-733	Estimating the frequency of Cry1F resistance in field populations of the European corn borer (Lepidoptera: Crambidae)	y	USA	Lepidoptera	Crambidae	Ostrinia	Ostrinia nubilalis	1 to 4	neonate	surface	7 d			3		112		Goodhue	EC50	EC50	Cry1F	Cry1F	0.61	ng/cm2	1	0.61										x	y	n	n	y	y	n	y
4836	Siegfried, B, D,, Rangasamy, M,, Wang, H,, Spencer, T,, Haridas, C, V,, Tenhumberg, B,, Sumerford, D, V,, & Storer, N, P,	2014	Pest Management Science, 70(5): 725-733	Estimating the frequency of Cry1F resistance in field populations of the European corn borer (Lepidoptera: Crambidae)	y	USA	Lepidoptera	Crambidae	Ostrinia	Ostrinia nubilalis	1 to 4	neonate	surface	7 d			3		112		Kandiyohi	EC50	EC50	Cry1F	Cry1F	1.02	ng/cm2	1	1.02										x	y	n	n	y	y	n	y
4836	Siegfried, B, D,, Rangasamy, M,, Wang, H,, Spencer, T,, Haridas, C, V,, Tenhumberg, B,, Sumerford, D, V,, & Storer, N, P,	2014	Pest Management Science, 70(5): 725-733	Estimating the frequency of Cry1F resistance in field populations of the European corn borer (Lepidoptera: Crambidae)	y	USA	Lepidoptera	Crambidae	Ostrinia	Ostrinia nubilalis	1 to 4	neonate	surface	7 d			3		112		Hamilton	EC50	EC50	Cry1F	Cry1F	0.44	ng/cm2	1	0.44										x	y	n	n	y	y	n	y
4836	Siegfried, B, D,, Rangasamy, M,, Wang, H,, Spencer, T,, Haridas, C, V,, Tenhumberg, B,, Sumerford, D, V,, & Storer, N, P,	2014	Pest Management Science, 70(5): 725-733	Estimating the frequency of Cry1F resistance in field populations of the European corn borer (Lepidoptera: Crambidae)	y	USA	Lepidoptera	Crambidae	Ostrinia	Ostrinia nubilalis	1 to 4	neonate	surface	7 d			3		112		Saunders	EC50	EC50	Cry1F	Cry1F	0.56	ng/cm2	1	0.56										x	y	n	n	y	y	n	y
4836	Siegfried, B, D,, Rangasamy, M,, Wang, H,, Spencer, T,, Haridas, C, V,, Tenhumberg, B,, Sumerford, D, V,, & Storer, N, P,	2014	Pest Management Science, 70(5): 725-733	Estimating the frequency of Cry1F resistance in field populations of the European corn borer (Lepidoptera: Crambidae)	y	USA	Lepidoptera	Crambidae	Ostrinia	Ostrinia nubilalis	1 to 4	neonate	surface	7 d			3		112		Union	EC50	EC50	Cry1F	Cry1F	0.39	ng/cm2	1	0.39										x	y	n	n	y	y	n	y
4836	Siegfried, B, D,, Rangasamy, M,, Wang, H,, Spencer, T,, Haridas, C, V,, Tenhumberg, B,, Sumerford, D, V,, & Storer, N, P,	2014	Pest Management Science, 70(5): 725-733	Estimating the frequency of Cry1F resistance in field populations of the European corn borer (Lepidoptera: Crambidae)	y	USA	Lepidoptera	Crambidae	Ostrinia	Ostrinia nubilalis	1 to 4	neonate	surface	7 d			3		112		McClean	EC50	EC50	Cry1F	Cry1F	0.94	ng/cm2	1	0.94										x	y	n	n	y	y	n	y
4836	Siegfried, B, D,, Rangasamy, M,, Wang, H,, Spencer, T,, Haridas, C, V,, Tenhumberg, B,, Sumerford, D, V,, & Storer, N, P,	2014	Pest Management Science, 70(5): 725-733	Estimating the frequency of Cry1F resistance in field populations of the European corn borer (Lepidoptera: Crambidae)	y	USA	Lepidoptera	Crambidae	Ostrinia	Ostrinia nubilalis	1 to 4	neonate	surface	7 d			3		112		Warren	EC50	EC50	Cry1F	Cry1F	0.94	ng/cm2	1	0.94										x	y	n	n	y	y	n	y
4836	Siegfried, B, D,, Rangasamy, M,, Wang, H,, Spencer, T,, Haridas, C, V,, Tenhumberg, B,, Sumerford, D, V,, & Storer, N, P,	2014	Pest Management Science, 70(5): 725-733	Estimating the frequency of Cry1F resistance in field populations of the European corn borer (Lepidoptera: Crambidae)	y	USA	Lepidoptera	Crambidae	Ostrinia	Ostrinia nubilalis	1 to 4	neonate	surface	7 d			3		112		Blackhawk	EC50	EC50	Cry1F	Cry1F	0.7	ng/cm2	1	0.7										x	y	n	n	y	y	n	y
4836	Siegfried, B, D,, Rangasamy, M,, Wang, H,, Spencer, T,, Haridas, C, V,, Tenhumberg, B,, Sumerford, D, V,, & Storer, N, P,	2014	Pest Management Science, 70(5): 725-733	Estimating the frequency of Cry1F resistance in field populations of the European corn borer (Lepidoptera: Crambidae)	y	USA	Lepidoptera	Crambidae	Ostrinia	Ostrinia nubilalis	1 to 4	neonate	surface	7 d			3		112		Bruce/Story	EC50	EC50	Cry1F	Cry1F	0.56	ng/cm2	1	0.56										x	y	n	n	y	y	n	y
4836	Siegfried, B, D,, Rangasamy, M,, Wang, H,, Spencer, T,, Haridas, C, V,, Tenhumberg, B,, Sumerford, D, V,, & Storer, N, P,	2014	Pest Management Science, 70(5): 725-733	Estimating the frequency of Cry1F resistance in field populations of the European corn borer (Lepidoptera: Crambidae)	y	USA	Lepidoptera	Crambidae	Ostrinia	Ostrinia nubilalis	1 to 4	neonate	surface	7 d			3		112		Delaware	EC50	EC50	Cry1F	Cry1F	0.62	ng/cm2	1	0.62										x	y	n	n	y	y	n	y
4836	Siegfried, B, D,, Rangasamy, M,, Wang, H,, Spencer, T,, Haridas, C, V,, Tenhumberg, B,, Sumerford, D, V,, & Storer, N, P,	2014	Pest Management Science, 70(5): 725-733	Estimating the frequency of Cry1F resistance in field populations of the European corn borer (Lepidoptera: Crambidae)	y	USA	Lepidoptera	Crambidae	Ostrinia	Ostrinia nubilalis	1 to 4	neonate	surface	7 d			3		112		Kossuth	EC50	EC50	Cry1F	Cry1F	1.15	ng/cm2	1	1.15										x	y	n	n	y	y	n	y
4836	Siegfried, B, D,, Rangasamy, M,, Wang, H,, Spencer, T,, Haridas, C, V,, Tenhumberg, B,, Sumerford, D, V,, & Storer, N, P,	2014	Pest Management Science, 70(5): 725-733	Estimating the frequency of Cry1F resistance in field populations of the European corn borer (Lepidoptera: Crambidae)	y	USA	Lepidoptera	Crambidae	Ostrinia	Ostrinia nubilalis	1 to 4	neonate	surface	7 d			3		112		Marshall	EC50	EC50	Cry1F	Cry1F	0.88	ng/cm2	1	0.88										x	y	n	n	y	y	n	y
4836	Siegfried, B, D,, Rangasamy, M,, Wang, H,, Spencer, T,, Haridas, C, V,, Tenhumberg, B,, Sumerford, D, V,, & Storer, N, P,	2014	Pest Management Science, 70(5): 725-733	Estimating the frequency of Cry1F resistance in field populations of the European corn borer (Lepidoptera: Crambidae)	y	USA	Lepidoptera	Crambidae	Ostrinia	Ostrinia nubilalis	1 to 4	neonate	surface	7 d			3		112		O’Brien	EC50	EC50	Cry1F	Cry1F	0.69	ng/cm2	1	0.69										x	y	n	n	y	y	n	y
4836	Siegfried, B, D,, Rangasamy, M,, Wang, H,, Spencer, T,, Haridas, C, V,, Tenhumberg, B,, Sumerford, D, V,, & Storer, N, P,	2014	Pest Management Science, 70(5): 725-733	Estimating the frequency of Cry1F resistance in field populations of the European corn borer (Lepidoptera: Crambidae)	y	USA	Lepidoptera	Crambidae	Ostrinia	Ostrinia nubilalis	1 to 4	neonate	surface	7 d			3		112		Goodhue	EC50	EC50	Cry1F	Cry1F	0.75	ng/cm2	1	0.75										x	y	n	n	y	y	n	y
4836	Siegfried, B, D,, Rangasamy, M,, Wang, H,, Spencer, T,, Haridas, C, V,, Tenhumberg, B,, Sumerford, D, V,, & Storer, N, P,	2014	Pest Management Science, 70(5): 725-733	Estimating the frequency of Cry1F resistance in field populations of the European corn borer (Lepidoptera: Crambidae)	y	USA	Lepidoptera	Crambidae	Ostrinia	Ostrinia nubilalis	1 to 4	neonate	surface	7 d			3		112		Hamilton	EC50	EC50	Cry1F	Cry1F	0.82	ng/cm2	1	0.82										x	y	n	n	y	y	n	y
4836	Siegfried, B, D,, Rangasamy, M,, Wang, H,, Spencer, T,, Haridas, C, V,, Tenhumberg, B,, Sumerford, D, V,, & Storer, N, P,	2014	Pest Management Science, 70(5): 725-733	Estimating the frequency of Cry1F resistance in field populations of the European corn borer (Lepidoptera: Crambidae)	y	USA	Lepidoptera	Crambidae	Ostrinia	Ostrinia nubilalis	1 to 4	neonate	surface	7 d			3		112		Saunders	EC50	EC50	Cry1F	Cry1F	0.76	ng/cm2	1	0.76										x	y	n	n	y	y	n	y
4836	Siegfried, B, D,, Rangasamy, M,, Wang, H,, Spencer, T,, Haridas, C, V,, Tenhumberg, B,, Sumerford, D, V,, & Storer, N, P,	2014	Pest Management Science, 70(5): 725-733	Estimating the frequency of Cry1F resistance in field populations of the European corn borer (Lepidoptera: Crambidae)	y	USA	Lepidoptera	Crambidae	Ostrinia	Ostrinia nubilalis	1 to 4	neonate	surface	7 d			3		112		Boone/Story	EC50	EC50	Cry1F	Cry1F	1.17	ng/cm2	1	1.17										x	y	n	n	y	y	n	y
4836	Siegfried, B, D,, Rangasamy, M,, Wang, H,, Spencer, T,, Haridas, C, V,, Tenhumberg, B,, Sumerford, D, V,, & Storer, N, P,	2014	Pest Management Science, 70(5): 725-733	Estimating the frequency of Cry1F resistance in field populations of the European corn borer (Lepidoptera: Crambidae)	y	USA	Lepidoptera	Crambidae	Ostrinia	Ostrinia nubilalis	1 to 4	neonate	surface	7 d			3		112		Crawford	EC50	EC50	Cry1F	Cry1F	2.58	ng/cm2	1	2.58										x	y	n	n	y	y	n	y
4836	Siegfried, B, D,, Rangasamy, M,, Wang, H,, Spencer, T,, Haridas, C, V,, Tenhumberg, B,, Sumerford, D, V,, & Storer, N, P,	2014	Pest Management Science, 70(5): 725-733	Estimating the frequency of Cry1F resistance in field populations of the European corn borer (Lepidoptera: Crambidae)	y	USA	Lepidoptera	Crambidae	Ostrinia	Ostrinia nubilalis	1 to 4	neonate	surface	7 d			3		112		Harrison	EC50	EC50	Cry1F	Cry1F	2.49	ng/cm2	1	2.49										x	y	n	n	y	y	n	y
4836	Siegfried, B, D,, Rangasamy, M,, Wang, H,, Spencer, T,, Haridas, C, V,, Tenhumberg, B,, Sumerford, D, V,, & Storer, N, P,	2014	Pest Management Science, 70(5): 725-733	Estimating the frequency of Cry1F resistance in field populations of the European corn borer (Lepidoptera: Crambidae)	y	USA	Lepidoptera	Crambidae	Ostrinia	Ostrinia nubilalis	1 to 4	neonate	surface	7 d			3		112		Iowa	EC50	EC50	Cry1F	Cry1F	2.24	ng/cm2	1	2.24										x	y	n	n	y	y	n	y
4836	Siegfried, B, D,, Rangasamy, M,, Wang, H,, Spencer, T,, Haridas, C, V,, Tenhumberg, B,, Sumerford, D, V,, & Storer, N, P,	2014	Pest Management Science, 70(5): 725-733	Estimating the frequency of Cry1F resistance in field populations of the European corn borer (Lepidoptera: Crambidae)	y	USA	Lepidoptera	Crambidae	Ostrinia	Ostrinia nubilalis	1 to 4	neonate	surface	7 d			3		112		Polk	EC50	EC50	Cry1F	Cry1F	2.39	ng/cm2	1	2.39										x	y	n	n	y	y	n	y
4836	Siegfried, B, D,, Rangasamy, M,, Wang, H,, Spencer, T,, Haridas, C, V,, Tenhumberg, B,, Sumerford, D, V,, & Storer, N, P,	2014	Pest Management Science, 70(5): 725-733	Estimating the frequency of Cry1F resistance in field populations of the European corn borer (Lepidoptera: Crambidae)	y	USA	Lepidoptera	Crambidae	Ostrinia	Ostrinia nubilalis	1 to 4	neonate	surface	7 d			3		112		Scott	EC50	EC50	Cry1F	Cry1F	2.65	ng/cm2	1	2.65										x	y	n	n	y	y	n	y
4836	Siegfried, B, D,, Rangasamy, M,, Wang, H,, Spencer, T,, Haridas, C, V,, Tenhumberg, B,, Sumerford, D, V,, & Storer, N, P,	2014	Pest Management Science, 70(5): 725-733	Estimating the frequency of Cry1F resistance in field populations of the European corn borer (Lepidoptera: Crambidae)	y	USA	Lepidoptera	Crambidae	Ostrinia	Ostrinia nubilalis	1 to 4	neonate	surface	7 d			3		112		Shelby	EC50	EC50	Cry1F	Cry1F	1.38	ng/cm2	1	1.38										x	y	n	n	y	y	n	y
4836	Siegfried, B, D,, Rangasamy, M,, Wang, H,, Spencer, T,, Haridas, C, V,, Tenhumberg, B,, Sumerford, D, V,, & Storer, N, P,	2014	Pest Management Science, 70(5): 725-733	Estimating the frequency of Cry1F resistance in field populations of the European corn borer (Lepidoptera: Crambidae)	y	USA	Lepidoptera	Crambidae	Ostrinia	Ostrinia nubilalis	1 to 4	neonate	surface	7 d			3		112		Kandiyohi	EC50	EC50	Cry1F	Cry1F	0.92	ng/cm2	1	0.92										x	y	n	n	y	y	n	y
4836	Siegfried, B, D,, Rangasamy, M,, Wang, H,, Spencer, T,, Haridas, C, V,, Tenhumberg, B,, Sumerford, D, V,, & Storer, N, P,	2014	Pest Management Science, 70(5): 725-733	Estimating the frequency of Cry1F resistance in field populations of the European corn borer (Lepidoptera: Crambidae)	y	USA	Lepidoptera	Crambidae	Ostrinia	Ostrinia nubilalis	1 to 4	neonate	surface	7 d			3		112		Sibley	EC50	EC50	Cry1F	Cry1F	1.06	ng/cm2	1	1.06										x	y	n	n	y	y	n	y
4836	Siegfried, B, D,, Rangasamy, M,, Wang, H,, Spencer, T,, Haridas, C, V,, Tenhumberg, B,, Sumerford, D, V,, & Storer, N, P,	2014	Pest Management Science, 70(5): 725-733	Estimating the frequency of Cry1F resistance in field populations of the European corn borer (Lepidoptera: Crambidae)	y	USA	Lepidoptera	Crambidae	Ostrinia	Ostrinia nubilalis	1 to 4	neonate	surface	7 d			3		112		Hamilton	EC50	EC50	Cry1F	Cry1F	1.25	ng/cm2	1	1.25										x	y	n	n	y	y	n	y
4836	Siegfried, B, D,, Rangasamy, M,, Wang, H,, Spencer, T,, Haridas, C, V,, Tenhumberg, B,, Sumerford, D, V,, & Storer, N, P,	2014	Pest Management Science, 70(5): 725-733	Estimating the frequency of Cry1F resistance in field populations of the European corn borer (Lepidoptera: Crambidae)	y	USA	Lepidoptera	Crambidae	Ostrinia	Ostrinia nubilalis	1 to 4	neonate	surface	7 d			3		112		Saunders	EC50	EC50	Cry1F	Cry1F	1.04	ng/cm2	1	1.04										x	y	n	n	y	y	n	y
4836	Siegfried, B, D,, Rangasamy, M,, Wang, H,, Spencer, T,, Haridas, C, V,, Tenhumberg, B,, Sumerford, D, V,, & Storer, N, P,	2014	Pest Management Science, 70(5): 725-733	Estimating the frequency of Cry1F resistance in field populations of the European corn borer (Lepidoptera: Crambidae)	y	USA	Lepidoptera	Crambidae	Ostrinia	Ostrinia nubilalis	1 to 4	neonate	surface	7 d			3		112		Audubon	EC50	EC50	Cry1F	Cry1F	1.49	ng/cm2	1	1.49										x	y	n	n	y	y	n	y
4836	Siegfried, B, D,, Rangasamy, M,, Wang, H,, Spencer, T,, Haridas, C, V,, Tenhumberg, B,, Sumerford, D, V,, & Storer, N, P,	2014	Pest Management Science, 70(5): 725-733	Estimating the frequency of Cry1F resistance in field populations of the European corn borer (Lepidoptera: Crambidae)	y	USA	Lepidoptera	Crambidae	Ostrinia	Ostrinia nubilalis	1 to 4	neonate	surface	7 d			3		112		Boone	EC50	EC50	Cry1F	Cry1F	0.96	ng/cm2	1	0.96										x	y	n	n	y	y	n	y
4836	Siegfried, B, D,, Rangasamy, M,, Wang, H,, Spencer, T,, Haridas, C, V,, Tenhumberg, B,, Sumerford, D, V,, & Storer, N, P,	2014	Pest Management Science, 70(5): 725-733	Estimating the frequency of Cry1F resistance in field populations of the European corn borer (Lepidoptera: Crambidae)	y	USA	Lepidoptera	Crambidae	Ostrinia	Ostrinia nubilalis	1 to 4	neonate	surface	7 d			3		112		Bremer	EC50	EC50	Cry1F	Cry1F	0.97	ng/cm2	1	0.97										x	y	n	n	y	y	n	y
4836	Siegfried, B, D,, Rangasamy, M,, Wang, H,, Spencer, T,, Haridas, C, V,, Tenhumberg, B,, Sumerford, D, V,, & Storer, N, P,	2014	Pest Management Science, 70(5): 725-733	Estimating the frequency of Cry1F resistance in field populations of the European corn borer (Lepidoptera: Crambidae)	y	USA	Lepidoptera	Crambidae	Ostrinia	Ostrinia nubilalis	1 to 4	neonate	surface	7 d			3		112		Dubuque	EC50	EC50	Cry1F	Cry1F	1.12	ng/cm2	1	1.12										x	y	n	n	y	y	n	y
4836	Siegfried, B, D,, Rangasamy, M,, Wang, H,, Spencer, T,, Haridas, C, V,, Tenhumberg, B,, Sumerford, D, V,, & Storer, N, P,	2014	Pest Management Science, 70(5): 725-733	Estimating the frequency of Cry1F resistance in field populations of the European corn borer (Lepidoptera: Crambidae)	y	USA	Lepidoptera	Crambidae	Ostrinia	Ostrinia nubilalis	1 to 4	neonate	surface	7 d			3		112		Hamilton 1	EC50	EC50	Cry1F	Cry1F	1.15	ng/cm2	1	1.15										x	y	n	n	y	y	n	y
4836	Siegfried, B, D,, Rangasamy, M,, Wang, H,, Spencer, T,, Haridas, C, V,, Tenhumberg, B,, Sumerford, D, V,, & Storer, N, P,	2014	Pest Management Science, 70(5): 725-733	Estimating the frequency of Cry1F resistance in field populations of the European corn borer (Lepidoptera: Crambidae)	y	USA	Lepidoptera	Crambidae	Ostrinia	Ostrinia nubilalis	1 to 4	neonate	surface	7 d			3		112		Hamilton 2	EC50	EC50	Cry1F	Cry1F	1.48	ng/cm2	1	1.48										x	y	n	n	y	y	n	y
4836	Siegfried, B, D,, Rangasamy, M,, Wang, H,, Spencer, T,, Haridas, C, V,, Tenhumberg, B,, Sumerford, D, V,, & Storer, N, P,	2014	Pest Management Science, 70(5): 725-733	Estimating the frequency of Cry1F resistance in field populations of the European corn borer (Lepidoptera: Crambidae)	y	USA	Lepidoptera	Crambidae	Ostrinia	Ostrinia nubilalis	1 to 4	neonate	surface	7 d			3		112		Hamilton 3	EC50	EC50	Cry1F	Cry1F	1.69	ng/cm2	1	1.69										x	y	n	n	y	y	n	y
4836	Siegfried, B, D,, Rangasamy, M,, Wang, H,, Spencer, T,, Haridas, C, V,, Tenhumberg, B,, Sumerford, D, V,, & Storer, N, P,	2014	Pest Management Science, 70(5): 725-733	Estimating the frequency of Cry1F resistance in field populations of the European corn borer (Lepidoptera: Crambidae)	y	USA	Lepidoptera	Crambidae	Ostrinia	Ostrinia nubilalis	1 to 4	neonate	surface	7 d			3		112		Marshall	EC50	EC50	Cry1F	Cry1F	0.88	ng/cm2	1	0.88										x	y	n	n	y	y	n	y
4836	Siegfried, B, D,, Rangasamy, M,, Wang, H,, Spencer, T,, Haridas, C, V,, Tenhumberg, B,, Sumerford, D, V,, & Storer, N, P,	2014	Pest Management Science, 70(5): 725-733	Estimating the frequency of Cry1F resistance in field populations of the European corn borer (Lepidoptera: Crambidae)	y	USA	Lepidoptera	Crambidae	Ostrinia	Ostrinia nubilalis	1 to 4	neonate	surface	7 d			3		112		Monona	EC50	EC50	Cry1F	Cry1F	1.22	ng/cm2	1	1.22										x	y	n	n	y	y	n	y
4836	Siegfried, B, D,, Rangasamy, M,, Wang, H,, Spencer, T,, Haridas, C, V,, Tenhumberg, B,, Sumerford, D, V,, & Storer, N, P,	2014	Pest Management Science, 70(5): 725-733	Estimating the frequency of Cry1F resistance in field populations of the European corn borer (Lepidoptera: Crambidae)	y	USA	Lepidoptera	Crambidae	Ostrinia	Ostrinia nubilalis	1 to 4	neonate	surface	7 d			3		112		Montgomery	EC50	EC50	Cry1F	Cry1F	1.44	ng/cm2	1	1.44										x	y	n	n	y	y	n	y
4836	Siegfried, B, D,, Rangasamy, M,, Wang, H,, Spencer, T,, Haridas, C, V,, Tenhumberg, B,, Sumerford, D, V,, & Storer, N, P,	2014	Pest Management Science, 70(5): 725-733	Estimating the frequency of Cry1F resistance in field populations of the European corn borer (Lepidoptera: Crambidae)	y	USA	Lepidoptera	Crambidae	Ostrinia	Ostrinia nubilalis	1 to 4	neonate	surface	7 d			3		112		Sac	EC50	EC50	Cry1F	Cry1F	0.92	ng/cm2	1	0.92										x	y	n	n	y	y	n	y
4836	Siegfried, B, D,, Rangasamy, M,, Wang, H,, Spencer, T,, Haridas, C, V,, Tenhumberg, B,, Sumerford, D, V,, & Storer, N, P,	2014	Pest Management Science, 70(5): 725-733	Estimating the frequency of Cry1F resistance in field populations of the European corn borer (Lepidoptera: Crambidae)	y	USA	Lepidoptera	Crambidae	Ostrinia	Ostrinia nubilalis	1 to 4	neonate	surface	7 d			3		112		Story	EC50	EC50	Cry1F	Cry1F	0.93	ng/cm2	1	0.93										x	y	n	n	y	y	n	y
4836	Siegfried, B, D,, Rangasamy, M,, Wang, H,, Spencer, T,, Haridas, C, V,, Tenhumberg, B,, Sumerford, D, V,, & Storer, N, P,	2014	Pest Management Science, 70(5): 725-733	Estimating the frequency of Cry1F resistance in field populations of the European corn borer (Lepidoptera: Crambidae)	y	USA	Lepidoptera	Crambidae	Ostrinia	Ostrinia nubilalis	1 to 4	neonate	surface	7 d			3		112		Webster	EC50	EC50	Cry1F	Cry1F	1.32	ng/cm2	1	1.32										x	y	n	n	y	y	n	y
4836	Siegfried, B, D,, Rangasamy, M,, Wang, H,, Spencer, T,, Haridas, C, V,, Tenhumberg, B,, Sumerford, D, V,, & Storer, N, P,	2014	Pest Management Science, 70(5): 725-733	Estimating the frequency of Cry1F resistance in field populations of the European corn borer (Lepidoptera: Crambidae)	y	USA	Lepidoptera	Crambidae	Ostrinia	Ostrinia nubilalis	1 to 4	neonate	surface	7 d			3		112		Swift	EC50	EC50	Cry1F	Cry1F	1.49	ng/cm2	1	1.49										x	y	n	n	y	y	n	y
4836	Siegfried, B, D,, Rangasamy, M,, Wang, H,, Spencer, T,, Haridas, C, V,, Tenhumberg, B,, Sumerford, D, V,, & Storer, N, P,	2014	Pest Management Science, 70(5): 725-733	Estimating the frequency of Cry1F resistance in field populations of the European corn borer (Lepidoptera: Crambidae)	y	USA	Lepidoptera	Crambidae	Ostrinia	Ostrinia nubilalis	1 to 4	neonate	surface	7 d			3		112		Traverse	EC50	EC50	Cry1F	Cry1F	1.27	ng/cm2	1	1.27										x	y	n	n	y	y	n	y
4836	Siegfried, B, D,, Rangasamy, M,, Wang, H,, Spencer, T,, Haridas, C, V,, Tenhumberg, B,, Sumerford, D, V,, & Storer, N, P,	2014	Pest Management Science, 70(5): 725-733	Estimating the frequency of Cry1F resistance in field populations of the European corn borer (Lepidoptera: Crambidae)	y	USA	Lepidoptera	Crambidae	Ostrinia	Ostrinia nubilalis	1 to 4	neonate	surface	7 d			3		112		Dixon	EC50	EC50	Cry1F	Cry1F	1.07	ng/cm2	1	1.07										x	y	n	n	y	y	n	y
4836	Siegfried, B, D,, Rangasamy, M,, Wang, H,, Spencer, T,, Haridas, C, V,, Tenhumberg, B,, Sumerford, D, V,, & Storer, N, P,	2014	Pest Management Science, 70(5): 725-733	Estimating the frequency of Cry1F resistance in field populations of the European corn borer (Lepidoptera: Crambidae)	y	USA	Lepidoptera	Crambidae	Ostrinia	Ostrinia nubilalis	1 to 4	neonate	surface	7 d			3		112		Hamilton	EC50	EC50	Cry1F	Cry1F	1.58	ng/cm2	1	1.58										x	y	n	n	y	y	n	y
4836	Siegfried, B, D,, Rangasamy, M,, Wang, H,, Spencer, T,, Haridas, C, V,, Tenhumberg, B,, Sumerford, D, V,, & Storer, N, P,	2014	Pest Management Science, 70(5): 725-733	Estimating the frequency of Cry1F resistance in field populations of the European corn borer (Lepidoptera: Crambidae)	y	USA	Lepidoptera	Crambidae	Ostrinia	Ostrinia nubilalis	1 to 4	neonate	surface	7 d			3		112		Saunders	EC50	EC50	Cry1F	Cry1F	1.23	ng/cm2	1	1.23										x	y	n	n	y	y	n	y
4836	Siegfried, B, D,, Rangasamy, M,, Wang, H,, Spencer, T,, Haridas, C, V,, Tenhumberg, B,, Sumerford, D, V,, & Storer, N, P,	2014	Pest Management Science, 70(5): 725-733	Estimating the frequency of Cry1F resistance in field populations of the European corn borer (Lepidoptera: Crambidae)	y	USA	Lepidoptera	Crambidae	Ostrinia	Ostrinia nubilalis	1 to 4	neonate	surface	7 d			3		112		Seward	EC50	EC50	Cry1F	Cry1F	1.21	ng/cm2	1	1.21										x	y	n	n	y	y	n	y
4836	Siegfried, B, D,, Rangasamy, M,, Wang, H,, Spencer, T,, Haridas, C, V,, Tenhumberg, B,, Sumerford, D, V,, & Storer, N, P,	2014	Pest Management Science, 70(5): 725-733	Estimating the frequency of Cry1F resistance in field populations of the European corn borer (Lepidoptera: Crambidae)	y	USA	Lepidoptera	Crambidae	Ostrinia	Ostrinia nubilalis	1 to 4	neonate	surface	7 d			3		112		Brookings	EC50	EC50	Cry1F	Cry1F	0.98	ng/cm2	1	0.98										x	y	n	n	y	y	n	y
4836	Siegfried, B, D,, Rangasamy, M,, Wang, H,, Spencer, T,, Haridas, C, V,, Tenhumberg, B,, Sumerford, D, V,, & Storer, N, P,	2014	Pest Management Science, 70(5): 725-733	Estimating the frequency of Cry1F resistance in field populations of the European corn borer (Lepidoptera: Crambidae)	y	USA	Lepidoptera	Crambidae	Ostrinia	Ostrinia nubilalis	1 to 4	neonate	surface	7 d			3		112		Bremer	EC50	EC50	Cry1F	Cry1F	1.74	ng/cm2	1	1.74										x	y	n	n	y	y	n	y
4836	Siegfried, B, D,, Rangasamy, M,, Wang, H,, Spencer, T,, Haridas, C, V,, Tenhumberg, B,, Sumerford, D, V,, & Storer, N, P,	2014	Pest Management Science, 70(5): 725-733	Estimating the frequency of Cry1F resistance in field populations of the European corn borer (Lepidoptera: Crambidae)	y	USA	Lepidoptera	Crambidae	Ostrinia	Ostrinia nubilalis	1 to 4	neonate	surface	7 d			3		112		Hamilton 1	EC50	EC50	Cry1F	Cry1F	1.54	ng/cm2	1	1.54										x	y	n	n	y	y	n	y
4836	Siegfried, B, D,, Rangasamy, M,, Wang, H,, Spencer, T,, Haridas, C, V,, Tenhumberg, B,, Sumerford, D, V,, & Storer, N, P,	2014	Pest Management Science, 70(5): 725-733	Estimating the frequency of Cry1F resistance in field populations of the European corn borer (Lepidoptera: Crambidae)	y	USA	Lepidoptera	Crambidae	Ostrinia	Ostrinia nubilalis	1 to 4	neonate	surface	7 d			3		112		Hamilton 2	EC50	EC50	Cry1F	Cry1F	1.86	ng/cm2	1	1.86										x	y	n	n	y	y	n	y
4836	Siegfried, B, D,, Rangasamy, M,, Wang, H,, Spencer, T,, Haridas, C, V,, Tenhumberg, B,, Sumerford, D, V,, & Storer, N, P,	2014	Pest Management Science, 70(5): 725-733	Estimating the frequency of Cry1F resistance in field populations of the European corn borer (Lepidoptera: Crambidae)	y	USA	Lepidoptera	Crambidae	Ostrinia	Ostrinia nubilalis	1 to 4	neonate	surface	7 d			3		112		Marshall	EC50	EC50	Cry1F	Cry1F	1.57	ng/cm2	1	1.57										x	y	n	n	y	y	n	y
4836	Siegfried, B, D,, Rangasamy, M,, Wang, H,, Spencer, T,, Haridas, C, V,, Tenhumberg, B,, Sumerford, D, V,, & Storer, N, P,	2014	Pest Management Science, 70(5): 725-733	Estimating the frequency of Cry1F resistance in field populations of the European corn borer (Lepidoptera: Crambidae)	y	USA	Lepidoptera	Crambidae	Ostrinia	Ostrinia nubilalis	1 to 4	neonate	surface	7 d			3		112		Story	EC50	EC50	Cry1F	Cry1F	1.01	ng/cm2	1	1.01										x	y	n	n	y	y	n	y
4836	Siegfried, B, D,, Rangasamy, M,, Wang, H,, Spencer, T,, Haridas, C, V,, Tenhumberg, B,, Sumerford, D, V,, & Storer, N, P,	2014	Pest Management Science, 70(5): 725-733	Estimating the frequency of Cry1F resistance in field populations of the European corn borer (Lepidoptera: Crambidae)	y	USA	Lepidoptera	Crambidae	Ostrinia	Ostrinia nubilalis	1 to 4	neonate	surface	7 d			3		112		Bureau	EC50	EC50	Cry1F	Cry1F	1.42	ng/cm2	1	1.42										x	y	n	n	y	y	n	y
4836	Siegfried, B, D,, Rangasamy, M,, Wang, H,, Spencer, T,, Haridas, C, V,, Tenhumberg, B,, Sumerford, D, V,, & Storer, N, P,	2014	Pest Management Science, 70(5): 725-733	Estimating the frequency of Cry1F resistance in field populations of the European corn borer (Lepidoptera: Crambidae)	y	USA	Lepidoptera	Crambidae	Ostrinia	Ostrinia nubilalis	1 to 4	neonate	surface	7 d			3		112		Lee	EC50	EC50	Cry1F	Cry1F	1.58	ng/cm2	1	1.58										x	y	n	n	y	y	n	y
4836	Siegfried, B, D,, Rangasamy, M,, Wang, H,, Spencer, T,, Haridas, C, V,, Tenhumberg, B,, Sumerford, D, V,, & Storer, N, P,	2014	Pest Management Science, 70(5): 725-733	Estimating the frequency of Cry1F resistance in field populations of the European corn borer (Lepidoptera: Crambidae)	y	USA	Lepidoptera	Crambidae	Ostrinia	Ostrinia nubilalis	1 to 4	neonate	surface	7 d			3		112		Murray	EC50	EC50	Cry1F	Cry1F	1.3	ng/cm2	1	1.3										x	y	n	n	y	y	n	y
4836	Siegfried, B, D,, Rangasamy, M,, Wang, H,, Spencer, T,, Haridas, C, V,, Tenhumberg, B,, Sumerford, D, V,, & Storer, N, P,	2014	Pest Management Science, 70(5): 725-733	Estimating the frequency of Cry1F resistance in field populations of the European corn borer (Lepidoptera: Crambidae)	y	USA	Lepidoptera	Crambidae	Ostrinia	Ostrinia nubilalis	1 to 4	neonate	surface	7 d			3		112		Yellow Medicine	EC50	EC50	Cry1F	Cry1F	1.01	ng/cm2	1	1.01										x	y	n	n	y	y	n	y
4836	Siegfried, B, D,, Rangasamy, M,, Wang, H,, Spencer, T,, Haridas, C, V,, Tenhumberg, B,, Sumerford, D, V,, & Storer, N, P,	2014	Pest Management Science, 70(5): 725-733	Estimating the frequency of Cry1F resistance in field populations of the European corn borer (Lepidoptera: Crambidae)	y	USA	Lepidoptera	Crambidae	Ostrinia	Ostrinia nubilalis	1 to 4	neonate	surface	7 d			3		112		Jefferson F1	EC50	EC50	Cry1F	Cry1F	1.24	ng/cm2	1	1.24										x	y	n	n	y	y	n	y
4836	Siegfried, B, D,, Rangasamy, M,, Wang, H,, Spencer, T,, Haridas, C, V,, Tenhumberg, B,, Sumerford, D, V,, & Storer, N, P,	2014	Pest Management Science, 70(5): 725-733	Estimating the frequency of Cry1F resistance in field populations of the European corn borer (Lepidoptera: Crambidae)	y	USA	Lepidoptera	Crambidae	Ostrinia	Ostrinia nubilalis	1 to 4	neonate	surface	7 d			3		112		Jefferson F2	EC50	EC50	Cry1F	Cry1F	1.27	ng/cm2	1	1.27										x	y	n	n	y	y	n	y
4836	Siegfried, B, D,, Rangasamy, M,, Wang, H,, Spencer, T,, Haridas, C, V,, Tenhumberg, B,, Sumerford, D, V,, & Storer, N, P,	2014	Pest Management Science, 70(5): 725-733	Estimating the frequency of Cry1F resistance in field populations of the European corn borer (Lepidoptera: Crambidae)	y	USA	Lepidoptera	Crambidae	Ostrinia	Ostrinia nubilalis	1 to 4	neonate	surface	7 d			3		112		Dakota	EC50	EC50	Cry1F	Cry1F	0.94	ng/cm2	1	0.94										x	y	n	n	y	y	n	y
4836	Siegfried, B, D,, Rangasamy, M,, Wang, H,, Spencer, T,, Haridas, C, V,, Tenhumberg, B,, Sumerford, D, V,, & Storer, N, P,	2014	Pest Management Science, 70(5): 725-733	Estimating the frequency of Cry1F resistance in field populations of the European corn borer (Lepidoptera: Crambidae)	y	USA	Lepidoptera	Crambidae	Ostrinia	Ostrinia nubilalis	1 to 4	neonate	surface	7 d			3		112		Hamilton	EC50	EC50	Cry1F	Cry1F	1.56	ng/cm2	1	1.56										x	y	n	n	y	y	n	y
4836	Siegfried, B, D,, Rangasamy, M,, Wang, H,, Spencer, T,, Haridas, C, V,, Tenhumberg, B,, Sumerford, D, V,, & Storer, N, P,	2014	Pest Management Science, 70(5): 725-733	Estimating the frequency of Cry1F resistance in field populations of the European corn borer (Lepidoptera: Crambidae)	y	USA	Lepidoptera	Crambidae	Ostrinia	Ostrinia nubilalis	1 to 4	neonate	surface	7 d			3		112		Saunders	EC50	EC50	Cry1F	Cry1F	0.87	ng/cm2	1	0.87										x	y	n	n	y	y	n	y
4836	Siegfried, B, D,, Rangasamy, M,, Wang, H,, Spencer, T,, Haridas, C, V,, Tenhumberg, B,, Sumerford, D, V,, & Storer, N, P,	2014	Pest Management Science, 70(5): 725-733	Estimating the frequency of Cry1F resistance in field populations of the European corn borer (Lepidoptera: Crambidae)	y	USA	Lepidoptera	Crambidae	Ostrinia	Ostrinia nubilalis	1 to 4	neonate	surface	7 d			3		112		Seward	EC50	EC50	Cry1F	Cry1F	1	ng/cm2	1	1										x	y	n	n	y	y	n	y
4836	Siegfried, B, D,, Rangasamy, M,, Wang, H,, Spencer, T,, Haridas, C, V,, Tenhumberg, B,, Sumerford, D, V,, & Storer, N, P,	2014	Pest Management Science, 70(5): 725-733	Estimating the frequency of Cry1F resistance in field populations of the European corn borer (Lepidoptera: Crambidae)	y	USA	Lepidoptera	Crambidae	Ostrinia	Ostrinia nubilalis	1 to 4	neonate	surface	7 d			3		112		Kingbury	EC50	EC50	Cry1F	Cry1F	0.93	ng/cm2	1	0.93										x	y	n	n	y	y	n	y
4836	Siegfried, B, D,, Rangasamy, M,, Wang, H,, Spencer, T,, Haridas, C, V,, Tenhumberg, B,, Sumerford, D, V,, & Storer, N, P,	2014	Pest Management Science, 70(5): 725-733	Estimating the frequency of Cry1F resistance in field populations of the European corn borer (Lepidoptera: Crambidae)	y	USA	Lepidoptera	Crambidae	Ostrinia	Ostrinia nubilalis	1 to 4	neonate	surface	7 d			3		112		Turner	EC50	EC50	Cry1F	Cry1F	1.59	ng/cm2	1	1.59										x	y	n	n	y	y	n	y
4836	Siegfried, B, D,, Rangasamy, M,, Wang, H,, Spencer, T,, Haridas, C, V,, Tenhumberg, B,, Sumerford, D, V,, & Storer, N, P,	2014	Pest Management Science, 70(5): 725-733	Estimating the frequency of Cry1F resistance in field populations of the European corn borer (Lepidoptera: Crambidae)	y	USA	Lepidoptera	Crambidae	Ostrinia	Ostrinia nubilalis	1 to 4	neonate	surface	7 d			3		112		Yankton	EC50	EC50	Cry1F	Cry1F	1.12	ng/cm2	1	1.12										x	y	n	n	y	y	n	y
4836	Siegfried, B, D,, Rangasamy, M,, Wang, H,, Spencer, T,, Haridas, C, V,, Tenhumberg, B,, Sumerford, D, V,, & Storer, N, P,	2014	Pest Management Science, 70(5): 725-733	Estimating the frequency of Cry1F resistance in field populations of the European corn borer (Lepidoptera: Crambidae)	y	USA	Lepidoptera	Crambidae	Ostrinia	Ostrinia nubilalis	1 to 4	neonate	surface	7 d			3		112		Warren	EC50	EC50	Cry1F	Cry1F	1.4	ng/cm2	1	1.4										x	y	n	n	y	y	n	y
4836	Siegfried, B, D,, Rangasamy, M,, Wang, H,, Spencer, T,, Haridas, C, V,, Tenhumberg, B,, Sumerford, D, V,, & Storer, N, P,	2014	Pest Management Science, 70(5): 725-733	Estimating the frequency of Cry1F resistance in field populations of the European corn borer (Lepidoptera: Crambidae)	y	USA	Lepidoptera	Crambidae	Ostrinia	Ostrinia nubilalis	1 to 4	neonate	surface	7 d			3		112		Henry	EC50	EC50	Cry1F	Cry1F	1.71	ng/cm2	1	1.71										x	y	n	n	y	y	n	y
4836	Siegfried, B, D,, Rangasamy, M,, Wang, H,, Spencer, T,, Haridas, C, V,, Tenhumberg, B,, Sumerford, D, V,, & Storer, N, P,	2014	Pest Management Science, 70(5): 725-733	Estimating the frequency of Cry1F resistance in field populations of the European corn borer (Lepidoptera: Crambidae)	y	USA	Lepidoptera	Crambidae	Ostrinia	Ostrinia nubilalis	1 to 4	neonate	surface	7 d			3		112		Hamilton 1	EC50	EC50	Cry1F	Cry1F	0.8	ng/cm2	1	0.8										x	y	n	n	y	y	n	y
4836	Siegfried, B, D,, Rangasamy, M,, Wang, H,, Spencer, T,, Haridas, C, V,, Tenhumberg, B,, Sumerford, D, V,, & Storer, N, P,	2014	Pest Management Science, 70(5): 725-733	Estimating the frequency of Cry1F resistance in field populations of the European corn borer (Lepidoptera: Crambidae)	y	USA	Lepidoptera	Crambidae	Ostrinia	Ostrinia nubilalis	1 to 4	neonate	surface	7 d			3		112		Hamilton 2	EC50	EC50	Cry1F	Cry1F	1.15	ng/cm2	1	1.15										x	y	n	n	y	y	n	y
4836	Siegfried, B, D,, Rangasamy, M,, Wang, H,, Spencer, T,, Haridas, C, V,, Tenhumberg, B,, Sumerford, D, V,, & Storer, N, P,	2014	Pest Management Science, 70(5): 725-733	Estimating the frequency of Cry1F resistance in field populations of the European corn borer (Lepidoptera: Crambidae)	y	USA	Lepidoptera	Crambidae	Ostrinia	Ostrinia nubilalis	1 to 4	neonate	surface	7 d			3		112		Bremer	EC50	EC50	Cry1F	Cry1F	1.34	ng/cm2	1	1.34										x	y	n	n	y	y	n	y
4836	Siegfried, B, D,, Rangasamy, M,, Wang, H,, Spencer, T,, Haridas, C, V,, Tenhumberg, B,, Sumerford, D, V,, & Storer, N, P,	2014	Pest Management Science, 70(5): 725-733	Estimating the frequency of Cry1F resistance in field populations of the European corn borer (Lepidoptera: Crambidae)	y	USA	Lepidoptera	Crambidae	Ostrinia	Ostrinia nubilalis	1 to 4	neonate	surface	7 d			3		112		Marshall	EC50	EC50	Cry1F	Cry1F	1.09	ng/cm2	1	1.09										x	y	n	n	y	y	n	y
4836	Siegfried, B, D,, Rangasamy, M,, Wang, H,, Spencer, T,, Haridas, C, V,, Tenhumberg, B,, Sumerford, D, V,, & Storer, N, P,	2014	Pest Management Science, 70(5): 725-733	Estimating the frequency of Cry1F resistance in field populations of the European corn borer (Lepidoptera: Crambidae)	y	USA	Lepidoptera	Crambidae	Ostrinia	Ostrinia nubilalis	1 to 4	neonate	surface	7 d			3		112		Story	EC50	EC50	Cry1F	Cry1F	0.91	ng/cm2	1	0.91										x	y	n	n	y	y	n	y
4836	Siegfried, B, D,, Rangasamy, M,, Wang, H,, Spencer, T,, Haridas, C, V,, Tenhumberg, B,, Sumerford, D, V,, & Storer, N, P,	2014	Pest Management Science, 70(5): 725-733	Estimating the frequency of Cry1F resistance in field populations of the European corn borer (Lepidoptera: Crambidae)	y	USA	Lepidoptera	Crambidae	Ostrinia	Ostrinia nubilalis	1 to 4	neonate	surface	7 d			3		112		Atchison	EC50	EC50	Cry1F	Cry1F	1.1	ng/cm2	1	1.1										x	y	n	n	y	y	n	y
4836	Siegfried, B, D,, Rangasamy, M,, Wang, H,, Spencer, T,, Haridas, C, V,, Tenhumberg, B,, Sumerford, D, V,, & Storer, N, P,	2014	Pest Management Science, 70(5): 725-733	Estimating the frequency of Cry1F resistance in field populations of the European corn borer (Lepidoptera: Crambidae)	y	USA	Lepidoptera	Crambidae	Ostrinia	Ostrinia nubilalis	1 to 4	neonate	surface	7 d			3		112		Lac Qui Parle	EC50	EC50	Cry1F	Cry1F	1.09	ng/cm2	1	1.09										x	y	n	n	y	y	n	y
4836	Siegfried, B, D,, Rangasamy, M,, Wang, H,, Spencer, T,, Haridas, C, V,, Tenhumberg, B,, Sumerford, D, V,, & Storer, N, P,	2014	Pest Management Science, 70(5): 725-733	Estimating the frequency of Cry1F resistance in field populations of the European corn borer (Lepidoptera: Crambidae)	y	USA	Lepidoptera	Crambidae	Ostrinia	Ostrinia nubilalis	1 to 4	neonate	surface	7 d			3		112		Hamilton	EC50	EC50	Cry1F	Cry1F	1.26	ng/cm2	1	1.26										x	y	n	n	y	y	n	y
4836	Siegfried, B, D,, Rangasamy, M,, Wang, H,, Spencer, T,, Haridas, C, V,, Tenhumberg, B,, Sumerford, D, V,, & Storer, N, P,	2014	Pest Management Science, 70(5): 725-733	Estimating the frequency of Cry1F resistance in field populations of the European corn borer (Lepidoptera: Crambidae)	y	USA	Lepidoptera	Crambidae	Ostrinia	Ostrinia nubilalis	1 to 4	neonate	surface	7 d			3		112		Johnson	EC50	EC50	Cry1F	Cry1F	1.4	ng/cm2	1	1.4										x	y	n	n	y	y	n	y
4836	Siegfried, B, D,, Rangasamy, M,, Wang, H,, Spencer, T,, Haridas, C, V,, Tenhumberg, B,, Sumerford, D, V,, & Storer, N, P,	2014	Pest Management Science, 70(5): 725-733	Estimating the frequency of Cry1F resistance in field populations of the European corn borer (Lepidoptera: Crambidae)	y	USA	Lepidoptera	Crambidae	Ostrinia	Ostrinia nubilalis	1 to 4	neonate	surface	7 d			3		112		Saunders	EC50	EC50	Cry1F	Cry1F	1.44	ng/cm2	1	1.44										x	y	n	n	y	y	n	y
4836	Siegfried, B, D,, Rangasamy, M,, Wang, H,, Spencer, T,, Haridas, C, V,, Tenhumberg, B,, Sumerford, D, V,, & Storer, N, P,	2014	Pest Management Science, 70(5): 725-733	Estimating the frequency of Cry1F resistance in field populations of the European corn borer (Lepidoptera: Crambidae)	y	USA	Lepidoptera	Crambidae	Ostrinia	Ostrinia nubilalis	1 to 4	neonate	surface	7 d			3		112		Seward	EC50	EC50	Cry1F	Cry1F	1.43	ng/cm2	1	1.43										x	y	n	n	y	y	n	y
4836	Siegfried, B, D,, Rangasamy, M,, Wang, H,, Spencer, T,, Haridas, C, V,, Tenhumberg, B,, Sumerford, D, V,, & Storer, N, P,	2014	Pest Management Science, 70(5): 725-733	Estimating the frequency of Cry1F resistance in field populations of the European corn borer (Lepidoptera: Crambidae)	y	USA	Lepidoptera	Crambidae	Ostrinia	Ostrinia nubilalis	1 to 4	neonate	surface	7 d			3		112		Thayer	EC50	EC50	Cry1F	Cry1F	1.59	ng/cm2	1	1.59										x	y	n	n	y	y	n	y
4836	Siegfried, B, D,, Rangasamy, M,, Wang, H,, Spencer, T,, Haridas, C, V,, Tenhumberg, B,, Sumerford, D, V,, & Storer, N, P,	2014	Pest Management Science, 70(5): 725-733	Estimating the frequency of Cry1F resistance in field populations of the European corn borer (Lepidoptera: Crambidae)	y	USA	Lepidoptera	Crambidae	Ostrinia	Ostrinia nubilalis	1 to 4	neonate	surface	7 d			3		112		Codington	EC50	EC50	Cry1F	Cry1F	0.76	ng/cm2	1	0.76										x	y	n	n	y	y	n	y
4836	Siegfried, B, D,, Rangasamy, M,, Wang, H,, Spencer, T,, Haridas, C, V,, Tenhumberg, B,, Sumerford, D, V,, & Storer, N, P,	2014	Pest Management Science, 70(5): 725-733	Estimating the frequency of Cry1F resistance in field populations of the European corn borer (Lepidoptera: Crambidae)	y	USA	Lepidoptera	Crambidae	Ostrinia	Ostrinia nubilalis	1 to 4	neonate	surface	7 d			3		112		Audubon	EC50	EC50	Cry1F	Cry1F	1.54	ng/cm2	1	1.54										x	y	n	n	y	y	n	y
4836	Siegfried, B, D,, Rangasamy, M,, Wang, H,, Spencer, T,, Haridas, C, V,, Tenhumberg, B,, Sumerford, D, V,, & Storer, N, P,	2014	Pest Management Science, 70(5): 725-733	Estimating the frequency of Cry1F resistance in field populations of the European corn borer (Lepidoptera: Crambidae)	y	USA	Lepidoptera	Crambidae	Ostrinia	Ostrinia nubilalis	1 to 4	neonate	surface	7 d			3		112		Fremont	EC50	EC50	Cry1F	Cry1F	1.61	ng/cm2	1	1.61										x	y	n	n	y	y	n	y
4836	Siegfried, B, D,, Rangasamy, M,, Wang, H,, Spencer, T,, Haridas, C, V,, Tenhumberg, B,, Sumerford, D, V,, & Storer, N, P,	2014	Pest Management Science, 70(5): 725-733	Estimating the frequency of Cry1F resistance in field populations of the European corn borer (Lepidoptera: Crambidae)	y	USA	Lepidoptera	Crambidae	Ostrinia	Ostrinia nubilalis	1 to 4	neonate	surface	7 d			3		112		Hamilton	EC50	EC50	Cry1F	Cry1F	1.74	ng/cm2	1	1.74										x	y	n	n	y	y	n	y
4836	Siegfried, B, D,, Rangasamy, M,, Wang, H,, Spencer, T,, Haridas, C, V,, Tenhumberg, B,, Sumerford, D, V,, & Storer, N, P,	2014	Pest Management Science, 70(5): 725-733	Estimating the frequency of Cry1F resistance in field populations of the European corn borer (Lepidoptera: Crambidae)	y	USA	Lepidoptera	Crambidae	Ostrinia	Ostrinia nubilalis	1 to 4	neonate	surface	7 d			3		112		Marshall	EC50	EC50	Cry1F	Cry1F	1.45	ng/cm2	1	1.45										x	y	n	n	y	y	n	y
4836	Siegfried, B, D,, Rangasamy, M,, Wang, H,, Spencer, T,, Haridas, C, V,, Tenhumberg, B,, Sumerford, D, V,, & Storer, N, P,	2014	Pest Management Science, 70(5): 725-733	Estimating the frequency of Cry1F resistance in field populations of the European corn borer (Lepidoptera: Crambidae)	y	USA	Lepidoptera	Crambidae	Ostrinia	Ostrinia nubilalis	1 to 4	neonate	surface	7 d			3		112		Story	EC50	EC50	Cry1F	Cry1F	1.48	ng/cm2	1	1.48										x	y	n	n	y	y	n	y
4836	Siegfried, B, D,, Rangasamy, M,, Wang, H,, Spencer, T,, Haridas, C, V,, Tenhumberg, B,, Sumerford, D, V,, & Storer, N, P,	2014	Pest Management Science, 70(5): 725-733	Estimating the frequency of Cry1F resistance in field populations of the European corn borer (Lepidoptera: Crambidae)	y	USA	Lepidoptera	Crambidae	Ostrinia	Ostrinia nubilalis	1 to 4	neonate	surface	7 d			3		112		Monmouth	EC50	EC50	Cry1F	Cry1F	1.67	ng/cm2	1	1.67										x	y	n	n	y	y	n	y
4836	Siegfried, B, D,, Rangasamy, M,, Wang, H,, Spencer, T,, Haridas, C, V,, Tenhumberg, B,, Sumerford, D, V,, & Storer, N, P,	2014	Pest Management Science, 70(5): 725-733	Estimating the frequency of Cry1F resistance in field populations of the European corn borer (Lepidoptera: Crambidae)	y	USA	Lepidoptera	Crambidae	Ostrinia	Ostrinia nubilalis	1 to 4	neonate	surface	7 d			3		112		Colfax	EC50	EC50	Cry1F	Cry1F	1.33	ng/cm2	1	1.33										x	y	n	n	y	y	n	y
4836	Siegfried, B, D,, Rangasamy, M,, Wang, H,, Spencer, T,, Haridas, C, V,, Tenhumberg, B,, Sumerford, D, V,, & Storer, N, P,	2014	Pest Management Science, 70(5): 725-733	Estimating the frequency of Cry1F resistance in field populations of the European corn borer (Lepidoptera: Crambidae)	y	USA	Lepidoptera	Crambidae	Ostrinia	Ostrinia nubilalis	1 to 4	neonate	surface	7 d			3		112		Fillmore	EC50	EC50	Cry1F	Cry1F	1.07	ng/cm2	1	1.07										x	y	n	n	y	y	n	y
4836	Siegfried, B, D,, Rangasamy, M,, Wang, H,, Spencer, T,, Haridas, C, V,, Tenhumberg, B,, Sumerford, D, V,, & Storer, N, P,	2014	Pest Management Science, 70(5): 725-733	Estimating the frequency of Cry1F resistance in field populations of the European corn borer (Lepidoptera: Crambidae)	y	USA	Lepidoptera	Crambidae	Ostrinia	Ostrinia nubilalis	1 to 4	neonate	surface	7 d			3		112		Hamilton	EC50	EC50	Cry1F	Cry1F	1.63	ng/cm2	1	1.63										x	y	n	n	y	y	n	y
4836	Siegfried, B, D,, Rangasamy, M,, Wang, H,, Spencer, T,, Haridas, C, V,, Tenhumberg, B,, Sumerford, D, V,, & Storer, N, P,	2014	Pest Management Science, 70(5): 725-733	Estimating the frequency of Cry1F resistance in field populations of the European corn borer (Lepidoptera: Crambidae)	y	USA	Lepidoptera	Crambidae	Ostrinia	Ostrinia nubilalis	1 to 4	neonate	surface	7 d			3		112		Saunders	EC50	EC50	Cry1F	Cry1F	0.85	ng/cm2	1	0.85										x	y	n	n	y	y	n	y
4836	Siegfried, B, D,, Rangasamy, M,, Wang, H,, Spencer, T,, Haridas, C, V,, Tenhumberg, B,, Sumerford, D, V,, & Storer, N, P,	2014	Pest Management Science, 70(5): 725-733	Estimating the frequency of Cry1F resistance in field populations of the European corn borer (Lepidoptera: Crambidae)	y	USA	Lepidoptera	Crambidae	Ostrinia	Ostrinia nubilalis	1 to 4	neonate	surface	7 d			3		112		Seward	EC50	EC50	Cry1F	Cry1F	1.53	ng/cm2	1	1.53										x	y	n	n	y	y	n	y
4836	Siegfried, B, D,, Rangasamy, M,, Wang, H,, Spencer, T,, Haridas, C, V,, Tenhumberg, B,, Sumerford, D, V,, & Storer, N, P,	2014	Pest Management Science, 70(5): 725-733	Estimating the frequency of Cry1F resistance in field populations of the European corn borer (Lepidoptera: Crambidae)	y	USA	Lepidoptera	Crambidae	Ostrinia	Ostrinia nubilalis	1 to 4	neonate	surface	7 d			3		112		Yankton	EC50	EC50	Cry1F	Cry1F	1.98	ng/cm2	1	1.98										x	y	n	n	y	y	n	y
4836	Siegfried, B, D,, Rangasamy, M,, Wang, H,, Spencer, T,, Haridas, C, V,, Tenhumberg, B,, Sumerford, D, V,, & Storer, N, P,	2014	Pest Management Science, 70(5): 725-733	Estimating the frequency of Cry1F resistance in field populations of the European corn borer (Lepidoptera: Crambidae)	y	USA	Lepidoptera	Crambidae	Ostrinia	Ostrinia nubilalis	1 to 4	neonate	surface	7 d			3		112		Bremer	EC50	EC50	Cry1F	Cry1F	1.26	ng/cm2	1	1.26										x	y	n	n	y	y	n	y
4836	Siegfried, B, D,, Rangasamy, M,, Wang, H,, Spencer, T,, Haridas, C, V,, Tenhumberg, B,, Sumerford, D, V,, & Storer, N, P,	2014	Pest Management Science, 70(5): 725-733	Estimating the frequency of Cry1F resistance in field populations of the European corn borer (Lepidoptera: Crambidae)	y	USA	Lepidoptera	Crambidae	Ostrinia	Ostrinia nubilalis	1 to 4	neonate	surface	7 d			3		112		Harrison	EC50	EC50	Cry1F	Cry1F	1.16	ng/cm2	1	1.16										x	y	n	n	y	y	n	y
4836	Siegfried, B, D,, Rangasamy, M,, Wang, H,, Spencer, T,, Haridas, C, V,, Tenhumberg, B,, Sumerford, D, V,, & Storer, N, P,	2014	Pest Management Science, 70(5): 725-733	Estimating the frequency of Cry1F resistance in field populations of the European corn borer (Lepidoptera: Crambidae)	y	USA	Lepidoptera	Crambidae	Ostrinia	Ostrinia nubilalis	1 to 4	neonate	surface	7 d			3		112		Marshall	EC50	EC50	Cry1F	Cry1F	2.05	ng/cm2	1	2.05										x	y	n	n	y	y	n	y
4836	Siegfried, B, D,, Rangasamy, M,, Wang, H,, Spencer, T,, Haridas, C, V,, Tenhumberg, B,, Sumerford, D, V,, & Storer, N, P,	2014	Pest Management Science, 70(5): 725-733	Estimating the frequency of Cry1F resistance in field populations of the European corn borer (Lepidoptera: Crambidae)	y	USA	Lepidoptera	Crambidae	Ostrinia	Ostrinia nubilalis	1 to 4	neonate	surface	7 d			3		112		Scott	EC50	EC50	Cry1F	Cry1F	0.92	ng/cm2	1	0.92										x	y	n	n	y	y	n	y
4836	Siegfried, B, D,, Rangasamy, M,, Wang, H,, Spencer, T,, Haridas, C, V,, Tenhumberg, B,, Sumerford, D, V,, & Storer, N, P,	2014	Pest Management Science, 70(5): 725-733	Estimating the frequency of Cry1F resistance in field populations of the European corn borer (Lepidoptera: Crambidae)	y	USA	Lepidoptera	Crambidae	Ostrinia	Ostrinia nubilalis	1 to 4	neonate	surface	7 d			3		112		Story	EC50	EC50	Cry1F	Cry1F	1.27	ng/cm2	1	1.27										x	y	n	n	y	y	n	y
4836	Siegfried, B, D,, Rangasamy, M,, Wang, H,, Spencer, T,, Haridas, C, V,, Tenhumberg, B,, Sumerford, D, V,, & Storer, N, P,	2014	Pest Management Science, 70(5): 725-733	Estimating the frequency of Cry1F resistance in field populations of the European corn borer (Lepidoptera: Crambidae)	y	USA	Lepidoptera	Crambidae	Ostrinia	Ostrinia nubilalis	1 to 4	neonate	surface	7 d			3		112		Warren	EC50	EC50	Cry1F	Cry1F	1.49	ng/cm2	1	1.49										x	y	n	n	y	y	n	y
4836	Siegfried, B, D,, Rangasamy, M,, Wang, H,, Spencer, T,, Haridas, C, V,, Tenhumberg, B,, Sumerford, D, V,, & Storer, N, P,	2014	Pest Management Science, 70(5): 725-733	Estimating the frequency of Cry1F resistance in field populations of the European corn borer (Lepidoptera: Crambidae)	y	USA	Lepidoptera	Crambidae	Ostrinia	Ostrinia nubilalis	1 to 4	neonate	surface	7 d			3		112		Kandiyohi	EC50	EC50	Cry1F	Cry1F	0.68	ng/cm2	1	0.68										x	y	n	n	y	y	n	y
4836	Siegfried, B, D,, Rangasamy, M,, Wang, H,, Spencer, T,, Haridas, C, V,, Tenhumberg, B,, Sumerford, D, V,, & Storer, N, P,	2014	Pest Management Science, 70(5): 725-733	Estimating the frequency of Cry1F resistance in field populations of the European corn borer (Lepidoptera: Crambidae)	y	USA	Lepidoptera	Crambidae	Ostrinia	Ostrinia nubilalis	1 to 4	neonate	surface	7 d			3		112		Yellow Medicine	EC50	EC50	Cry1F	Cry1F	1.45	ng/cm2	1	1.45										x	y	n	n	y	y	n	y
4836	Siegfried, B, D,, Rangasamy, M,, Wang, H,, Spencer, T,, Haridas, C, V,, Tenhumberg, B,, Sumerford, D, V,, & Storer, N, P,	2014	Pest Management Science, 70(5): 725-733	Estimating the frequency of Cry1F resistance in field populations of the European corn borer (Lepidoptera: Crambidae)	y	USA	Lepidoptera	Crambidae	Ostrinia	Ostrinia nubilalis	1 to 4	neonate	surface	7 d			3		112		Dakota	EC50	EC50	Cry1F	Cry1F	1.8	ng/cm2	1	1.8										x	y	n	n	y	y	n	y
4836	Siegfried, B, D,, Rangasamy, M,, Wang, H,, Spencer, T,, Haridas, C, V,, Tenhumberg, B,, Sumerford, D, V,, & Storer, N, P,	2014	Pest Management Science, 70(5): 725-733	Estimating the frequency of Cry1F resistance in field populations of the European corn borer (Lepidoptera: Crambidae)	y	USA	Lepidoptera	Crambidae	Ostrinia	Ostrinia nubilalis	1 to 4	neonate	surface	7 d			3		112		Hamilton	EC50	EC50	Cry1F	Cry1F	1.28	ng/cm2	1	1.28										x	y	n	n	y	y	n	y
4836	Siegfried, B, D,, Rangasamy, M,, Wang, H,, Spencer, T,, Haridas, C, V,, Tenhumberg, B,, Sumerford, D, V,, & Storer, N, P,	2014	Pest Management Science, 70(5): 725-733	Estimating the frequency of Cry1F resistance in field populations of the European corn borer (Lepidoptera: Crambidae)	y	USA	Lepidoptera	Crambidae	Ostrinia	Ostrinia nubilalis	1 to 4	neonate	surface	7 d			3		112		Johnson	EC50	EC50	Cry1F	Cry1F	1.93	ng/cm2	1	1.93										x	y	n	n	y	y	n	y
4836	Siegfried, B, D,, Rangasamy, M,, Wang, H,, Spencer, T,, Haridas, C, V,, Tenhumberg, B,, Sumerford, D, V,, & Storer, N, P,	2014	Pest Management Science, 70(5): 725-733	Estimating the frequency of Cry1F resistance in field populations of the European corn borer (Lepidoptera: Crambidae)	y	USA	Lepidoptera	Crambidae	Ostrinia	Ostrinia nubilalis	1 to 4	neonate	surface	7 d			3		112		Pierce	EC50	EC50	Cry1F	Cry1F	1.46	ng/cm2	1	1.46										x	y	n	n	y	y	n	y
4836	Siegfried, B, D,, Rangasamy, M,, Wang, H,, Spencer, T,, Haridas, C, V,, Tenhumberg, B,, Sumerford, D, V,, & Storer, N, P,	2014	Pest Management Science, 70(5): 725-733	Estimating the frequency of Cry1F resistance in field populations of the European corn borer (Lepidoptera: Crambidae)	y	USA	Lepidoptera	Crambidae	Ostrinia	Ostrinia nubilalis	1 to 4	neonate	surface	7 d			3		112		Saunders	EC50	EC50	Cry1F	Cry1F	1.59	ng/cm2	1	1.59										x	y	n	n	y	y	n	y
4836	Siegfried, B, D,, Rangasamy, M,, Wang, H,, Spencer, T,, Haridas, C, V,, Tenhumberg, B,, Sumerford, D, V,, & Storer, N, P,	2014	Pest Management Science, 70(5): 725-733	Estimating the frequency of Cry1F resistance in field populations of the European corn borer (Lepidoptera: Crambidae)	y	USA	Lepidoptera	Crambidae	Ostrinia	Ostrinia nubilalis	1 to 4	neonate	surface	7 d			3		112		Seward	EC50	EC50	Cry1F	Cry1F	1.99	ng/cm2	1	1.99										x	y	n	n	y	y	n	y
4836	Siegfried, B, D,, Rangasamy, M,, Wang, H,, Spencer, T,, Haridas, C, V,, Tenhumberg, B,, Sumerford, D, V,, & Storer, N, P,	2014	Pest Management Science, 70(5): 725-733	Estimating the frequency of Cry1F resistance in field populations of the European corn borer (Lepidoptera: Crambidae)	y	USA	Lepidoptera	Crambidae	Ostrinia	Ostrinia nubilalis	1 to 4	neonate	surface	7 d			3		112		Duel	EC50	EC50	Cry1F	Cry1F	1.24	ng/cm2	1	1.24										x	y	n	n	y	y	n	y
4836	Siegfried, B, D,, Rangasamy, M,, Wang, H,, Spencer, T,, Haridas, C, V,, Tenhumberg, B,, Sumerford, D, V,, & Storer, N, P,	2014	Pest Management Science, 70(5): 725-733	Estimating the frequency of Cry1F resistance in field populations of the European corn borer (Lepidoptera: Crambidae)	y	USA	Lepidoptera	Crambidae	Ostrinia	Ostrinia nubilalis	1 to 4	neonate	surface	7 d			3		112		Moody	EC50	EC50	Cry1F	Cry1F	1.09	ng/cm2	1	1.09										x	y	n	n	y	y	n	y
4836	Siegfried, B, D,, Rangasamy, M,, Wang, H,, Spencer, T,, Haridas, C, V,, Tenhumberg, B,, Sumerford, D, V,, & Storer, N, P,	2014	Pest Management Science, 70(5): 725-733	Estimating the frequency of Cry1F resistance in field populations of the European corn borer (Lepidoptera: Crambidae)	y	USA	Lepidoptera	Crambidae	Ostrinia	Ostrinia nubilalis	1 to 4	neonate	surface	7 d			3		112		Bremer .	EC50	EC50	Cry1F	Cry1F	0.73	ng/cm2	1	0.73										x	y	n	n	y	y	n	y
4836	Siegfried, B, D,, Rangasamy, M,, Wang, H,, Spencer, T,, Haridas, C, V,, Tenhumberg, B,, Sumerford, D, V,, & Storer, N, P,	2014	Pest Management Science, 70(5): 725-733	Estimating the frequency of Cry1F resistance in field populations of the European corn borer (Lepidoptera: Crambidae)	y	USA	Lepidoptera	Crambidae	Ostrinia	Ostrinia nubilalis	1 to 4	neonate	surface	7 d			3		112		Dallas	EC50	EC50	Cry1F	Cry1F	0.73	ng/cm2	1	0.73										x	y	n	n	y	y	n	y
4836	Siegfried, B, D,, Rangasamy, M,, Wang, H,, Spencer, T,, Haridas, C, V,, Tenhumberg, B,, Sumerford, D, V,, & Storer, N, P,	2014	Pest Management Science, 70(5): 725-733	Estimating the frequency of Cry1F resistance in field populations of the European corn borer (Lepidoptera: Crambidae)	y	USA	Lepidoptera	Crambidae	Ostrinia	Ostrinia nubilalis	1 to 4	neonate	surface	7 d			3		112		Marshall	EC50	EC50	Cry1F	Cry1F	0.8	ng/cm2	1	0.8										x	y	n	n	y	y	n	y
4836	Siegfried, B, D,, Rangasamy, M,, Wang, H,, Spencer, T,, Haridas, C, V,, Tenhumberg, B,, Sumerford, D, V,, & Storer, N, P,	2014	Pest Management Science, 70(5): 725-733	Estimating the frequency of Cry1F resistance in field populations of the European corn borer (Lepidoptera: Crambidae)	y	USA	Lepidoptera	Crambidae	Ostrinia	Ostrinia nubilalis	1 to 4	neonate	surface	7 d			3		112		Monona	EC50	EC50	Cry1F	Cry1F	0.74	ng/cm2	1	0.74										x	y	n	n	y	y	n	y
4836	Siegfried, B, D,, Rangasamy, M,, Wang, H,, Spencer, T,, Haridas, C, V,, Tenhumberg, B,, Sumerford, D, V,, & Storer, N, P,	2014	Pest Management Science, 70(5): 725-733	Estimating the frequency of Cry1F resistance in field populations of the European corn borer (Lepidoptera: Crambidae)	y	USA	Lepidoptera	Crambidae	Ostrinia	Ostrinia nubilalis	1 to 4	neonate	surface	7 d			3		112		Scott	EC50	EC50	Cry1F	Cry1F	0.59	ng/cm2	1	0.59										x	y	n	n	y	y	n	y
4836	Siegfried, B, D,, Rangasamy, M,, Wang, H,, Spencer, T,, Haridas, C, V,, Tenhumberg, B,, Sumerford, D, V,, & Storer, N, P,	2014	Pest Management Science, 70(5): 725-733	Estimating the frequency of Cry1F resistance in field populations of the European corn borer (Lepidoptera: Crambidae)	y	USA	Lepidoptera	Crambidae	Ostrinia	Ostrinia nubilalis	1 to 4	neonate	surface	7 d			3		112		Chippewa	EC50	EC50	Cry1F	Cry1F	1.07	ng/cm2	1	1.07										x	y	n	n	y	y	n	y
4836	Siegfried, B, D,, Rangasamy, M,, Wang, H,, Spencer, T,, Haridas, C, V,, Tenhumberg, B,, Sumerford, D, V,, & Storer, N, P,	2014	Pest Management Science, 70(5): 725-733	Estimating the frequency of Cry1F resistance in field populations of the European corn borer (Lepidoptera: Crambidae)	y	USA	Lepidoptera	Crambidae	Ostrinia	Ostrinia nubilalis	1 to 4	neonate	surface	7 d			3		112		Sibley	EC50	EC50	Cry1F	Cry1F	0.63	ng/cm2	1	0.63										x	y	n	n	y	y	n	y
4836	Siegfried, B, D,, Rangasamy, M,, Wang, H,, Spencer, T,, Haridas, C, V,, Tenhumberg, B,, Sumerford, D, V,, & Storer, N, P,	2014	Pest Management Science, 70(5): 725-733	Estimating the frequency of Cry1F resistance in field populations of the European corn borer (Lepidoptera: Crambidae)	y	USA	Lepidoptera	Crambidae	Ostrinia	Ostrinia nubilalis	1 to 4	neonate	surface	7 d			3		112		Fillmore	EC50	EC50	Cry1F	Cry1F	1.79	ng/cm2	1	1.79										x	y	n	n	y	y	n	y
4836	Siegfried, B, D,, Rangasamy, M,, Wang, H,, Spencer, T,, Haridas, C, V,, Tenhumberg, B,, Sumerford, D, V,, & Storer, N, P,	2014	Pest Management Science, 70(5): 725-733	Estimating the frequency of Cry1F resistance in field populations of the European corn borer (Lepidoptera: Crambidae)	y	USA	Lepidoptera	Crambidae	Ostrinia	Ostrinia nubilalis	1 to 4	neonate	surface	7 d			3		112		Hamilton	EC50	EC50	Cry1F	Cry1F	1.55	ng/cm2	1	1.55										x	y	n	n	y	y	n	y
4836	Siegfried, B, D,, Rangasamy, M,, Wang, H,, Spencer, T,, Haridas, C, V,, Tenhumberg, B,, Sumerford, D, V,, & Storer, N, P,	2014	Pest Management Science, 70(5): 725-733	Estimating the frequency of Cry1F resistance in field populations of the European corn borer (Lepidoptera: Crambidae)	y	USA	Lepidoptera	Crambidae	Ostrinia	Ostrinia nubilalis	1 to 4	neonate	surface	7 d			3		112		Platte	EC50	EC50	Cry1F	Cry1F	1.14	ng/cm2	1	1.14										x	y	n	n	y	y	n	y
4836	Siegfried, B, D,, Rangasamy, M,, Wang, H,, Spencer, T,, Haridas, C, V,, Tenhumberg, B,, Sumerford, D, V,, & Storer, N, P,	2014	Pest Management Science, 70(5): 725-733	Estimating the frequency of Cry1F resistance in field populations of the European corn borer (Lepidoptera: Crambidae)	y	USA	Lepidoptera	Crambidae	Ostrinia	Ostrinia nubilalis	1 to 4	neonate	surface	7 d			3		112		Saunders	EC50	EC50	Cry1F	Cry1F	1.19	ng/cm2	1	1.19										x	y	n	n	y	y	n	y
4836	Siegfried, B, D,, Rangasamy, M,, Wang, H,, Spencer, T,, Haridas, C, V,, Tenhumberg, B,, Sumerford, D, V,, & Storer, N, P,	2014	Pest Management Science, 70(5): 725-733	Estimating the frequency of Cry1F resistance in field populations of the European corn borer (Lepidoptera: Crambidae)	y	USA	Lepidoptera	Crambidae	Ostrinia	Ostrinia nubilalis	1 to 4	neonate	surface	7 d			3		112		Seward	EC50	EC50	Cry1F	Cry1F	1.85	ng/cm2	1	1.85										x	y	n	n	y	y	n	y
4836	Siegfried, B, D,, Rangasamy, M,, Wang, H,, Spencer, T,, Haridas, C, V,, Tenhumberg, B,, Sumerford, D, V,, & Storer, N, P,	2014	Pest Management Science, 70(5): 725-733	Estimating the frequency of Cry1F resistance in field populations of the European corn borer (Lepidoptera: Crambidae)	y	USA	Lepidoptera	Crambidae	Ostrinia	Ostrinia nubilalis	1 to 4	neonate	surface	7 d			3		112		Grant	EC50	EC50	Cry1F	Cry1F	0.99	ng/cm2	1	0.99										x	y	n	n	y	y	n	y
4836	Siegfried, B, D,, Rangasamy, M,, Wang, H,, Spencer, T,, Haridas, C, V,, Tenhumberg, B,, Sumerford, D, V,, & Storer, N, P,	2014	Pest Management Science, 70(5): 725-733	Estimating the frequency of Cry1F resistance in field populations of the European corn borer (Lepidoptera: Crambidae)	y	USA	Lepidoptera	Crambidae	Ostrinia	Ostrinia nubilalis	1 to 4	neonate	surface	7 d			3		112		Turner	EC50	EC50	Cry1F	Cry1F	0.9	ng/cm2	1	0.9										x	y	n	n	y	y	n	y
4836	Siegfried, B, D,, Rangasamy, M,, Wang, H,, Spencer, T,, Haridas, C, V,, Tenhumberg, B,, Sumerford, D, V,, & Storer, N, P,	2014	Pest Management Science, 70(5): 725-733	Estimating the frequency of Cry1F resistance in field populations of the European corn borer (Lepidoptera: Crambidae)	y	USA	Lepidoptera	Crambidae	Ostrinia	Ostrinia nubilalis	1 to 4	neonate	surface	7 d			3		112		Audubon	EC50	EC50	Cry1F	Cry1F	1.53	ng/cm2	1	1.53										x	y	n	n	y	y	n	y
4836	Siegfried, B, D,, Rangasamy, M,, Wang, H,, Spencer, T,, Haridas, C, V,, Tenhumberg, B,, Sumerford, D, V,, & Storer, N, P,	2014	Pest Management Science, 70(5): 725-733	Estimating the frequency of Cry1F resistance in field populations of the European corn borer (Lepidoptera: Crambidae)	y	USA	Lepidoptera	Crambidae	Ostrinia	Ostrinia nubilalis	1 to 4	neonate	surface	7 d			3		112		Bremer	EC50	EC50	Cry1F	Cry1F	1.24	ng/cm2	1	1.24										x	y	n	n	y	y	n	y
4836	Siegfried, B, D,, Rangasamy, M,, Wang, H,, Spencer, T,, Haridas, C, V,, Tenhumberg, B,, Sumerford, D, V,, & Storer, N, P,	2014	Pest Management Science, 70(5): 725-733	Estimating the frequency of Cry1F resistance in field populations of the European corn borer (Lepidoptera: Crambidae)	y	USA	Lepidoptera	Crambidae	Ostrinia	Ostrinia nubilalis	1 to 4	neonate	surface	7 d			3		112		Marshall	EC50	EC50	Cry1F	Cry1F	1.32	ng/cm2	1	1.32										x	y	n	n	y	y	n	y
4836	Siegfried, B, D,, Rangasamy, M,, Wang, H,, Spencer, T,, Haridas, C, V,, Tenhumberg, B,, Sumerford, D, V,, & Storer, N, P,	2014	Pest Management Science, 70(5): 725-733	Estimating the frequency of Cry1F resistance in field populations of the European corn borer (Lepidoptera: Crambidae)	y	USA	Lepidoptera	Crambidae	Ostrinia	Ostrinia nubilalis	1 to 4	neonate	surface	7 d			3		112		Scott	EC50	EC50	Cry1F	Cry1F	1.12	ng/cm2	1	1.12										x	y	n	n	y	y	n	y
4836	Siegfried, B, D,, Rangasamy, M,, Wang, H,, Spencer, T,, Haridas, C, V,, Tenhumberg, B,, Sumerford, D, V,, & Storer, N, P,	2014	Pest Management Science, 70(5): 725-733	Estimating the frequency of Cry1F resistance in field populations of the European corn borer (Lepidoptera: Crambidae)	y	USA	Lepidoptera	Crambidae	Ostrinia	Ostrinia nubilalis	1 to 4	neonate	surface	7 d			3		112		Story	EC50	EC50	Cry1F	Cry1F	1.76	ng/cm2	1	1.76										x	y	n	n	y	y	n	y
4836	Siegfried, B, D,, Rangasamy, M,, Wang, H,, Spencer, T,, Haridas, C, V,, Tenhumberg, B,, Sumerford, D, V,, & Storer, N, P,	2014	Pest Management Science, 70(5): 725-733	Estimating the frequency of Cry1F resistance in field populations of the European corn borer (Lepidoptera: Crambidae)	y	USA	Lepidoptera	Crambidae	Ostrinia	Ostrinia nubilalis	1 to 4	neonate	surface	7 d			3		112		Pope	EC50	EC50	Cry1F	Cry1F	1.22	ng/cm2	1	1.22										x	y	n	n	y	y	n	y
[truncated: 337 more rows]
